# Supplementary material for: Metal catalyst-free substitution of allylic and propargylic phosphates with diarylmethyl anions
Source: Royal Society of Chemistry journal article supplement (doi:10.1039/c6cc00024j), 2016-01-01

## Metal Catalyst-free Substitution of Allylic and Propargylic Phosphates with Diarylmethyl Anions

Hidehisa Kawashima, Narihito Ogawa, Ryohei Saeki and Yuichi Kobayashi\*

Department of Bioengineering, Tokyo Institute of Technology, Box B-52, Nagatsuta-cho 4259, Midori-ku, Yokohama 226-8501, Japan

|                                                                                                   |     |
|---------------------------------------------------------------------------------------------------|-----|
| <b>Part 1: Experimental</b>                                                                       | S2  |
| General Information                                                                               | S2  |
| Materials                                                                                         | S2  |
| GP1: General Procedure for Phosphorylation of Alcohols                                            | S2  |
| Phosphates                                                                                        | S2  |
| Reaction of 4-PyPhCH <sub>2</sub> ( <b>1e</b> ) with BuLi                                         | S7  |
| GP2: General Procedures for Substitution of Phosphates with Diarylmethanes using BuLi             | S7  |
| GP3: General Procedures for Substitution of Phosphates with Diarylmethanes using LDA              | S7  |
| Allylic Products                                                                                  | S7  |
| Propargylic Products                                                                              | S14 |
| <b>Part 2: References</b>                                                                         | S17 |
| <b>Part 3: D-Incorporation Experiments of Ph<sub>2</sub>CH<sub>2</sub> (<b>1a</b>) (Table S1)</b> | S18 |
| <b>Part 4: Determination of Enantiomeric, Diastereomeric, Regioisomeric Ratios</b>                | S23 |
| <b>Part 5: <sup>1</sup>H and <sup>13</sup>C NMR Spectra to Establish Identity and Purity</b>      | S55 |
| Phosphates                                                                                        | S56 |
| Reaction Product <b>29</b> derived from 4-PyPhCH <sub>2</sub> ( <b>1e</b> ) with BuLi             | S70 |
| Allylic Products                                                                                  | S71 |
| Propargylic Products                                                                              | S94 |

## Part 1: Experimental

### General Information

The  $^1\text{H}$  (300 or 400 MHz) and  $^{13}\text{C}$  NMR (75 or 100 MHz) spectroscopic data were recorded in  $\text{CDCl}_3$  using  $\text{Me}_4\text{Si}$  ( $\delta = 0$  ppm) and the centreline of the triplet ( $\delta = 77.1$  ppm), respectively, as internal standards. Signal patterns are indicated as br s (broad singlet), s (singlet), d (doublet), t (triplet), q (quartet) and m (multiplet). Coupling constants ( $J$ ) are given in Hertz (Hz). Chemical shifts of carbons are accompanied by minus (for C and  $\text{CH}_2$ ) and plus (for CH and  $\text{CH}_3$ ) signs of the attached proton test (APT) experiments. High-resolution mass spectroscopy (HRMS) was performed with a double-focusing mass spectrometer with an ionization mode of positive FAB or EI as indicated for each compound. The solvents that were distilled prior to use are THF (from Na/benzophenone),  $\text{Et}_2\text{O}$  (from Na/benzophenone) and  $\text{CH}_2\text{Cl}_2$  (from  $\text{CaH}_2$ ). Products were purified by chromatography on silica gel (Kanto, spherical silica gel 60N). Regioselectivity is expressed by % rs or by ratios of the products.

### Materials

Alcohol (*R*)-**6**, which had been prepared previously from (*R*)-but-3-yn-2-ol ((*R*)-**117**) of 98% ee,<sup>S1</sup> was converted to (*R*)-**3** (vide infra). (*S*)- and (*R*)-MTPA acids (both 99% ee) were purchased from Aldrich.

### GP1: General Procedure for Phosphorylation of Alcohols

To a solution of an alcohol (1 equiv) and *N*-methylimidazole (>1 equiv) in  $\text{CH}_2\text{Cl}_2$  was added diethyl chlorophosphate (>1 equiv). The solution was stirred at rt and diluted with saturated  $\text{NaHCO}_3$ . The resulting mixture was extracted with EtOAc several times. The combined extracts were washed with brine, dried over  $\text{MgSO}_4$  and concentrated under reduced pressure. The residual oil was purified by chromatography on silica gel to give the phosphate.

### Phosphates

#### (*R,E*)-5-((*tert*-Butyldimethylsilyloxy)pent-3-en-2-yl diethyl phosphate ((*R*)-**3**)

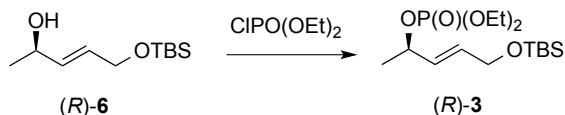

According to GP1 using alcohol (*R*)-**6**<sup>S1</sup> (98% ee, 220 mg, 1.03 mmol), diethyl chlorophosphate (0.22 mL, 1.54 mmol) and *N*-methylimidazole (0.15 mL, 1.85 mmol) in  $\text{CH}_2\text{Cl}_2$  (5 mL) at rt for 12 h afforded phosphate (*R*)-**3** (343 mg, 95% yield):  $R_f$  0.37 (hexane/EtOAc 1:1); IR (neat) 1472, 1390, 1259, 1035  $\text{cm}^{-1}$ ;  $^1\text{H}$  NMR (300 MHz,  $\text{CDCl}_3$ )  $\delta$  0.03 (s, 6 H), 0.87 (s, 9 H), 1.28 (dt,  $J = 1.0, 7.2$  Hz, 3 H), 1.30 (dt,  $J = 1.0, 7.2$  Hz, 3 H), 1.38 (d,  $J = 6.3$  Hz, 3 H), 3.99–4.12 (m, 4 H), 4.13–4.18 (m, 2 H), 4.92 (sext.,  $J = 6.6$  Hz, 1 H), 5.72 (dd,  $J = 15.3, 6.0$  Hz, 1 H), 5.79 (dt,  $J = 15.3, 3.6$  Hz, 1 H);  $^{13}\text{C}$  NMR (75 MHz,  $\text{CDCl}_3$ )  $\delta$  -5.3 (+), 16.1 (+) (d,  $J = 7$  Hz), 18.4 (-), 22.3 (+) (d,  $J = 5$  Hz), 25.9 (+), 62.7 (-), 63.50 (-) (d,  $J = 6$  Hz), 63.54 (-) (d,  $J = 6$  Hz), 75.2 (+) (d,  $J = 6$  Hz), 129.5 (+) (d,  $J = 5$  Hz), 131.5 (+). The  $^1\text{H}$  and  $^{13}\text{C}$ -APT NMR spectra were consistent with those reported.<sup>S1</sup>

#### (*E*)-6-((*tert*-Butyldimethylsilyloxy)hex-4-en-3-yl diethyl phosphate (**7**)

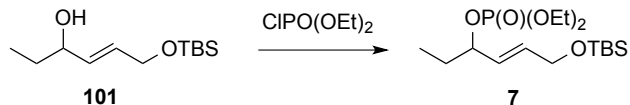

According to the literature procedure<sup>S1</sup> a mixture of alcohol **101** (193 mg, 0.835 mmol), diethyl chlorophosphate (0.18 mL, 1.25 mmol) and *N*-methylimidazole (0.12 mL, 1.51 mmol) in  $\text{CH}_2\text{Cl}_2$  (5 mL) was stirred at rt for 12 h to afford phosphate **7** (275 mg, 90% yield):  $R_f$  0.35 (hexane/EtOAc 2:1); IR (neat) 1472, 1390, 1259, 1035, 837  $\text{cm}^{-1}$ ;  $^1\text{H}$  NMR (400 MHz,  $\text{CDCl}_3$ )  $\delta$  0.07 (s, 6 H), 0.91 (s, 9 H), 0.93 (t,  $J = 7.4$  Hz, 3 H), 1.31 (dt,  $J = 1.2, 7.2$  Hz, 3 H), 1.33 (dt,  $J = 1.2, 7.2$  Hz, 3 H), 1.61–1.83 (m, 2 H), 4.02–4.15 (m, 4 H), 4.16–4.21 (m, 2 H), 4.73 (quint.,  $J = 7.0$  Hz, 1 H), 5.71 (ddt,  $J = 15.4, 7.2, 1.2$  Hz, 1 H), 5.84 (dt,  $J = 15.4, 4.3$  Hz, 1 H);  $^{13}\text{C}$  NMR (100 MHz,  $\text{CDCl}_3$ )  $\delta$  -5.3 (+), 9.3 (+), 16.13 (+) (d,  $J = 7$  Hz), 16.15 (+) (d,  $J = 7$  Hz), 18.4 (-), 25.9 (+), 29.1 (-) (d,  $J = 6$  Hz), 62.7 (-), 63.46 (-) (d,  $J = 6$  Hz), 63.48 (-) (d,  $J = 6$  Hz), 80.4 (+) (d,  $J = 6$  Hz), 128.0 (+) (d,  $J = 4$  Hz), 132.9 (+). The  $^1\text{H}$  and  $^{13}\text{C}$ -APT NMR spectra were consistent with those reported.<sup>S1</sup>

**(E)-6-((tert-Butyldimethylsilyloxy)-2-methylhex-4-en-3-yl diethyl phosphate (8)**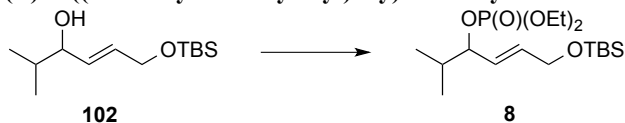

According to GP1 using alcohol **102** (76 mg, 0.31 mmol), diethyl chlorophosphate (0.067 mL, 0.47 mmol) and *N*-methylimidazole (0.044 mL, 0.56 mmol) in CH<sub>2</sub>Cl<sub>2</sub> (2 mL) at rt for 12 h afforded phosphate **8** (113 mg, 95% yield): *R<sub>f</sub>* 0.41 (hexane/EtOAc 2:1); IR (neat) 1471, 1389, 1258, 1037 cm<sup>-1</sup>; <sup>1</sup>H NMR (400 MHz, CDCl<sub>3</sub>) δ 0.06 (s, 6 H), 0.90 (s, 9 H), 0.92 (d, *J* = 6.8 Hz, 3 H), 0.94 (d, *J* = 6.8 Hz, 3 H), 1.30 (dt, *J* = 1.0, 7.1 Hz, 3 H), 1.32 (dt, *J* = 1.0, 7.1 Hz, 3 H), 1.93 (d of sept., *J* = 6.0, 6.8 Hz, 1 H), 4.02–4.16 (m, 4 H), 4.19 (dm, *J* = 4.2 Hz, 2 H), 4.58 (dt, *J* = 6.0, 7.5 Hz, 1 H), 5.71 (ddt, *J* = 15.4, 7.5, 1.7 Hz, 2 H), 5.84 (ddt, *J* = 15.4, 4.2, 0.6 Hz, 2 H); <sup>13</sup>C NMR (100 MHz, CDCl<sub>3</sub>) δ -5.3 (+), 16.1 (+) (d, *J* = 7 Hz), 16.2 (+) (d, *J* = 7 Hz), 17.6 (+), 18.0 (+), 18.4 (-), 25.9 (+), 33.4 (+) (d, *J* = 6 Hz), 62.7 (-), 63.5 (-) (d, *J* = 5 Hz), 84.0 (+) (d, *J* = 6 Hz), 126.1 (+) (d, *J* = 3 Hz), 133.8 (+); HRMS (FAB): *m/z* calcd for C<sub>17</sub>H<sub>38</sub>O<sub>5</sub>PSi [(M+H)<sup>+</sup>] 381.2226, found 381.2218.

**Diethyl hex-1-en-3-yl phosphate (9)**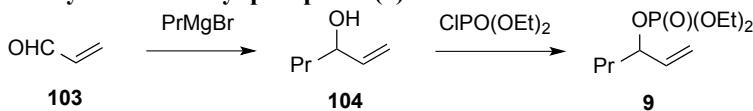

To a suspension of Mg turning (174 mg, 7.16 mmol) in THF (3 mL) was added 1-bromopropane (0.54 mL, 5.97 mmol) dropwise under reflux. The resulting mixture was cooled to rt and diluted with THF (3 mL). Acrolein (**103**) (0.20 mL, 2.99 mmol) was added to the mixture dropwise. The mixture was stirred at rt for 1 h and diluted with saturated NH<sub>4</sub>Cl. The resulting mixture was extracted with CH<sub>2</sub>Cl<sub>2</sub> three times. The combined extracts were dried over MgSO<sub>4</sub> and concentrated to afford crude alcohol **104**, which was used for the next reaction without further purification.

According to GP1 using the above alcohol **104**, diethyl chlorophosphate (0.86 mL, 5.98 mmol) and *N*-methylimidazole (0.59 mL, 7.48 mmol) in CH<sub>2</sub>Cl<sub>2</sub> (6 mL) at rt for 1 h afforded phosphate **9** (481 mg, 68% yield from **103**): *R<sub>f</sub>* 0.36 (hexane/EtOAc 2:1); IR (neat) 1264, 985 cm<sup>-1</sup>; <sup>1</sup>H NMR (400 MHz, CDCl<sub>3</sub>) δ 0.93 (t, *J* = 7.3 Hz, 3 H), 1.32 (dt, *J* = 1.0, 7.1 Hz, 3 H), 1.33 (dt, *J* = 1.0, 7.1 Hz, 3 H), 1.26–1.48 (m, 2 H), 1.54–1.65 (m, 1 H), 1.66–1.78 (m, 1 H), 4.03–4.16 (m, 4 H), 4.75 (ddt, *J* = 7.1, 6.8, 6.8 Hz, 1 H), 5.20 (dt, *J* = 10.3, 1.0 Hz, 1 H), 5.31 (dt, *J* = 17.3, 1.2 Hz, 1 H), 5.83 (ddd, *J* = 17.3, 10.3, 7.1 Hz, 1 H); <sup>13</sup>C NMR (100 MHz, CDCl<sub>3</sub>) δ 13.8 (+), 16.1 (+) (d, *J* = 7 Hz), 16.2 (+) (d, *J* = 7 Hz), 18.1 (-), 38.0 (-) (d, *J* = 6 Hz), 63.57 (-) (d, *J* = 6 Hz), 63.59 (-) (d, *J* = 6 Hz), 79.7 (+) (d, *J* = 6 Hz), 117.1 (-), 137.1 (+) (d, *J* = 4 Hz); HRMS (FAB): *m/z* calcd for C<sub>10</sub>H<sub>22</sub>O<sub>4</sub>P [(M+H)<sup>+</sup>] 237.1256, found 237.1255.

**(R,E)-Diethyl (1-(trimethylsilyloxy)oct-1-en-3-yl) phosphate ((R)-10)**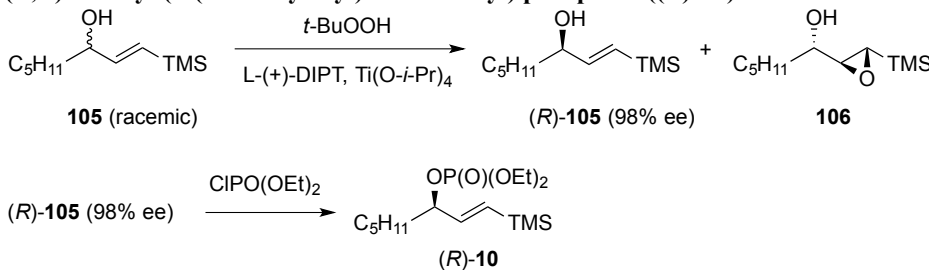

According to the literature procedure,<sup>S2</sup> a solution of **105** (982 mg, 4.90 mmol), Ti(O-*i*-Pr)<sub>4</sub> (1.45 mL, 4.90 mmol) and L-(+)-DIPT (1.24 mL, 5.88 mmol) in CH<sub>2</sub>Cl<sub>2</sub> (25 mL) was cooled to -40 °C. A solution of *t*-BuOOH (3.50 M in CH<sub>2</sub>Cl<sub>2</sub>, 2.10 mL, 7.35 mmol) was added to the solution. The reaction was conducted at -20 °C for 11 h and Me<sub>2</sub>S (1.10 mL, 14.9 mmol) was added to quench excess *t*-BuOOH. After 30 min at -20 °C, tartaric acid (10%, 1.0 mL) and NaF (2.91 g, 69 mmol) were added. The mixture was stirred at rt for 30 min and Celite (4.0 g) was added. The mixture was filtered through a pad of Celite. The filtrate was mixed with NaOH (10%, 50 mL) and the mixture was stirred at rt for 10 min. The organic solution was separated, and the aqueous solution was extracted with CH<sub>2</sub>Cl<sub>2</sub> twice. The combined extracts were dried over MgSO<sub>4</sub> and concentrated to afford a mixture of (*R*)-**105** and **106**. The mixture was subjected to chromatography on silica gel to afford (*R*)-**105** (401 mg, 41% yield) and **106** (426 mg, 40% yield). Alcohol (*R*)-**105** was converted to the MTPA ester to determine 98% ee by <sup>1</sup>H NMR.

According to GP1 using the above alcohol (*R*)-**105** (190 mg, 0.949 mmol), diethyl chlorophosphate (0.21 mL,

1.46 mmol) and *N*-methylimidazole (0.15 mL, 1.90 mmol) in CH<sub>2</sub>Cl<sub>2</sub> (3 mL) at rt for 1 h afforded phosphate (*R*)-**10** (266 mg, 83% yield): [ $\alpha$ ]<sub>D</sub><sup>21</sup> +8.5 (*c* 0.98, CHCl<sub>3</sub>); *R*<sub>f</sub> 0.74 (hexane/EtOAc 1:2); IR (neat) 1262, 1250, 1037, 986 cm<sup>-1</sup>; <sup>1</sup>H NMR (400 MHz, CDCl<sub>3</sub>)  $\delta$  0.04 (s, 9 H), 0.85 (d, *J* = 6.8 Hz, 3 H), 1.21–1.40 (m, 12 H), 1.52–1.74 (m, 2 H), 3.99–4.12 (m, 4 H), 4.64–4.73 (m, 1 H), 5.89 (d, *J* = 18.4 Hz, 1 H), 5.95 (dd, *J* = 18.4, 4.8 Hz, 1 H); <sup>13</sup>C NMR (100 MHz, CDCl<sub>3</sub>)  $\delta$  -1.4 (+), 14.0 (+), 16.2 (+) (*J* = 7 Hz), 22.5 (-), 24.4 (-), 31.5 (-), 35.7 (-) (d, *J* = 6 Hz), 63.5 (-) (d, *J* = 5 Hz), 81.5 (+) (d, *J* = 4 Hz), 132.4 (+), 144.1 (+); HRMS (EI): *m/z* calcd for C<sub>15</sub>H<sub>33</sub>O<sub>4</sub>PSi (M<sup>+</sup>) 336.1886, found 336.1888.

***cis*-4-((*tert*-Butyldimethylsilyloxy)cyclopent-2-en-1-yl diethyl phosphate (**11**)**

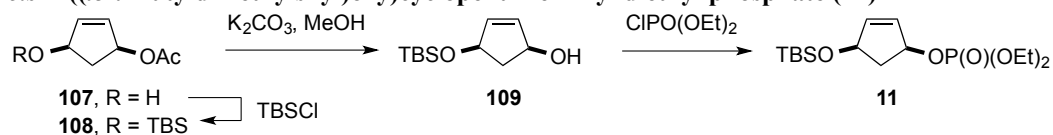

A mixture of alcohol **107**<sup>S3</sup> (1.05 g, 7.38 mmol), TBSCl (1.63 g, 10.8 mmol), imidazole (1.01 g, 14.9 mmol) and a catalytic amount of DMAP in CH<sub>2</sub>Cl<sub>2</sub> (10 mL) was stirred at rt for 12 h and diluted with brine. The resulting mixture was extracted with CH<sub>2</sub>Cl<sub>2</sub> three times. The combined extracts were washed with brine, dried over MgSO<sub>4</sub> and concentrated to afford TBS ether **108**, which was used for the next reaction without further purification.

A mixture of the above ether **108** and K<sub>2</sub>CO<sub>3</sub> (2.07 g, 14.9 mmol) in MeOH (15 mL) was stirred at rt for 17 h and diluted with saturated NH<sub>4</sub>Cl. The resulting mixture was extracted with EtOAc three times. The combined extracts were dried over MgSO<sub>4</sub> and concentrated to give a residue, which was purified by chromatography on silica gel (hexane/EtOAc) to afford alcohol **109** (1.34 g, 85% yield over two steps). The <sup>1</sup>H NMR spectrum was consistent with that reported.<sup>S1,S4,S5</sup>

According to GP1 using alcohol **109** (388 mg, 1.81 mmol), diethyl chlorophosphate (0.39 mL, 2.71 mmol) and *N*-methylimidazole (0.26 mL, 3.30 mmol) in CH<sub>2</sub>Cl<sub>2</sub> (10 mL) at rt for 11 h afforded phosphate **11** (566 mg, 89% yield): *R*<sub>f</sub> 0.40 (hexane/EtOAc 1:1); IR (neat) 1261, 1036, 1003 cm<sup>-1</sup>; <sup>1</sup>H NMR (300 MHz, CDCl<sub>3</sub>)  $\delta$  0.04 (s, 3 H), 0.05 (s, 3 H), 0.85 (s, 9 H), 1.30 (t, *J* = 7.2 Hz, 6 H), 1.72 (dt, *J* = 13.4, 5.4 Hz, 1 H), 2.78 (dt, *J* = 13.4, 7.2 Hz, 1 H), 4.07 (quint., *J* = 7.2 Hz, 4 H), 4.59–4.68 (m, 1 H), 5.10–5.20 (m, 1 H), 5.88–5.96 (m, 2 H); <sup>13</sup>C NMR (75 MHz, CDCl<sub>3</sub>)  $\delta$  -4.7 (+), -4.6 (+), 16.1 (+) (d, *J* = 7 Hz), 18.1 (-), 25.8 (+), 42.4 (-) (d, *J* = 4 Hz), 63.7 (-) (d, *J* = 6 Hz), 74.6 (+), 79.9 (+) (d, *J* = 6 Hz), 131.8 (+) (d, *J* = 6 Hz), 139.0 (+). The <sup>1</sup>H and <sup>13</sup>C–APT NMR spectra were consistent with those reported.<sup>S1</sup>

***trans*-4-((*tert*-Butyldimethylsilyloxy)cyclopent-2-en-1-yl diethyl phosphate (**12**)**

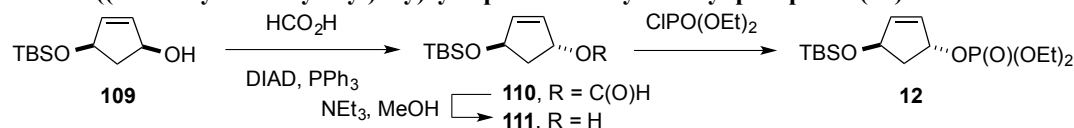

To an ice-cold solution of alcohol **109** (216 mg, 1.01 mmol), PPh<sub>3</sub> (537 mg, 2.05 mmol) and HCO<sub>2</sub>H (0.076 mL, 2.01 mmol) in toluene (10 mL) was added DIAD (0.39 mL, 2.02 mmol) dropwise. The mixture was stirred at rt for 12 h and diluted with saturated NaHCO<sub>3</sub>. The resulting mixture was extracted with EtOAc three times. The combined extracts were dried over MgSO<sub>4</sub> and concentrated to give a residue, which was purified by chromatography on silica gel (hexane/EtOAc) to afford formyl ester **110**.

A mixture of the above ester **110** and Et<sub>3</sub>N (0.014 mL, 0.100 mmol) in MeOH (3 mL) was stirred at rt for 6 h and concentrated to give a residue, which was purified by chromatography on silica gel (hexane/EtOAc) to afford alcohol **111** (206 mg, 95% yield over two steps).

According to GP1 using alcohol **111** (100.3 mg, 0.468 mmol), diethyl chlorophosphate (0.10 mL, 0.695 mmol) and *N*-methylimidazole (0.066 mL, 0.837 mmol) at rt for 10 h afforded phosphate **12** (138 mg, 84% yield): *R*<sub>f</sub> 0.40 (hexane/EtOAc 2:1); IR (neat) 1472, 1370, 1260, 1030 cm<sup>-1</sup>; <sup>1</sup>H NMR (300 MHz, CDCl<sub>3</sub>)  $\delta$  0.06 (s, 6 H), 0.86 (s, 9 H), 1.31 (tm, *J* = 7.2 Hz, 6 H), 2.01 (dddd, *J* = 14.4, 6.6, 3.9, 1.2 Hz, 1 H), 2.30 (ddd, *J* = 14.4, 6.6, 2.1 Hz, 1 H), 4.01–4.18 (m, 4 H), 5.02–5.11 (m, 1 H), 5.44–5.57 (m, 1 H), 5.98 (dt, *J* = 5.5, 2.1 Hz, 1 H), 6.03 (dd, *J* = 5.5, 1.2 Hz, 1 H); <sup>13</sup>C NMR (75 MHz, CDCl<sub>3</sub>)  $\delta$  -4.7 (+), 16.2 (+) (d, *J* = 7 Hz), 18.2 (-), 25.9 (+), 42.3 (-) (d, *J* = 5 Hz), 63.7 (-) (d, *J* = 6 Hz), 76.2 (+), 82.3 (+) (d, *J* = 6 Hz), 131.8 (+) (d, *J* = 4 Hz), 141.2 (+); HRMS (FAB): *m/z* calcd for C<sub>15</sub>H<sub>32</sub>O<sub>5</sub>PSi [(M+H)<sup>+</sup>] 351.1757, found 351.1745.

### Allyl diethyl phosphate (**13**)

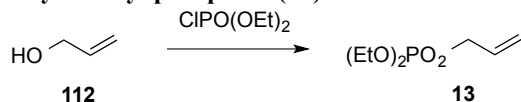

According to GP1 using alcohol **112** (0.10 mL, 1.47 mmol), diethyl chlorophosphate (0.21 mL, 1.46 mmol) and *N*-methylimidazole (0.13 mL, 1.65 mmol) in CH<sub>2</sub>Cl<sub>2</sub> (2 mL) at rt for 12 h afforded phosphate **13** (218 mg, 76% yield): *R*<sub>f</sub> 0.33 (hexane/EtOAc 1:2); <sup>1</sup>H NMR (300 MHz, CDCl<sub>3</sub>) δ 1.30 (d, *J* = 7.2 Hz, 6 H), 4.08 (quint., *J* = 7.2 Hz, 4 H), 4.49 (dd, *J* = 7.8, 5.6 Hz, 2 H), 5.21 (d, *J* = 10.2 Hz, 1 H), 5.33 (d, *J* = 17.1 Hz, 1 H), 5.90 (dd, *J* = 17.1, 10.2, 5.6 Hz, 1 H); <sup>13</sup>C NMR (75 MHz, CDCl<sub>3</sub>) δ 16.1 (+) (d, *J* = 7 Hz), 63.8 (-) (d, *J* = 6 Hz), 67.9 (-) (d, *J* = 5 Hz), 118.1 (-), 132.6 (+) (d, *J* = 7 Hz). The <sup>1</sup>H and <sup>13</sup>C NMR spectra were consistent with those reported.<sup>S6</sup>

### (*E*)-Diethyl hex-2-en-1-yl phosphate (**14**)

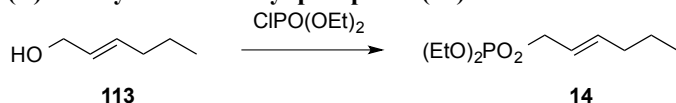

According to GP1 using alcohol **113** (0.50 mL, 4.19 mmol), diethyl chlorophosphate (0.91 mL, 6.29 mmol) and *N*-methylimidazole (0.60 mL, 7.55 mmol) at rt for 13 h afforded phosphate **14** (904 mg, 91% yield): *R*<sub>f</sub> 0.31 (hexane/EtOAc 1:1); IR (neat) 1459, 1393, 1265, 1034 cm<sup>-1</sup>; <sup>1</sup>H NMR (400 MHz, CDCl<sub>3</sub>) δ 0.91 (t, *J* = 7.5 Hz, 3 H), 1.34 (dt, *J* = 1.0, 7.1 Hz, 6 H), 1.41 (tq, *J* = 7.0, 7.5 Hz, 2 H), 2.04 (dt, *J* = 6.4, 7.0 Hz, 2 H), 4.10 (q, *J* = 7.1 Hz, 2 H), 4.12 (q, *J* = 7.1 Hz, 2 H), 4.48 (dd, *J* = 7.2, 6.6 Hz, 2 H), 5.60 (dtt, *J* = 15.3, 6.4, 1.2 Hz, 1 H), 5.80 (dt, *J* = 15.3, 6.6 Hz, 1 H); <sup>13</sup>C NMR (100 MHz, CDCl<sub>3</sub>) δ 13.5 (+), 16.0 (+) (d, *J* = 7 Hz), 21.9 (-), 34.1 (-), 63.5 (-) (d, *J* = 6 Hz), 68.1 (-) (d, *J* = 6 Hz), 124.5 (+) (d, *J* = 7 Hz), 136.3 (+); HRMS (FAB): *m/z* calcd for C<sub>10</sub>H<sub>22</sub>O<sub>4</sub>P [(M+H)<sup>+</sup>] 237.1256, found 237.1251. The <sup>1</sup>H NMR spectrum was consistent with that reported.<sup>S7</sup>

### (*E*)-3,7-Dimethylocta-2,6-dien-1-yl diethyl phosphate (**15**)

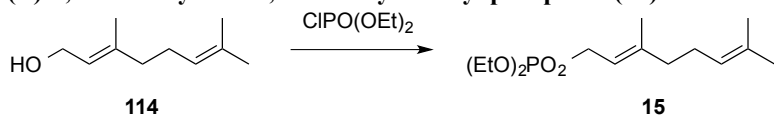

According to GP1 using geraniol (**114**) (297 mg, 1.93 mmol), diethyl chlorophosphate (0.42 mL, 2.92 mmol) and *N*-methylimidazole (0.27 mL, 3.42 mmol) in CH<sub>2</sub>Cl<sub>2</sub> (2 mL) at rt for 12 h afforded phosphate **15** (517 mg, 92% yield, >97% *E* olefin by <sup>13</sup>C NMR): *R*<sub>f</sub> 0.45 (hexane/EtOAc 1:2); <sup>1</sup>H NMR (300 MHz, CDCl<sub>3</sub>) δ 1.34 (dt, *J* = 1.2, 7.1 Hz, 6 H), 1.60 (s, 3 H), 1.68 (s, 3 H), 1.71 (s, 3 H), 2.01–2.17 (m, 4 H), 4.11 (dq, *J* = 7.8, 7.1 Hz, 4 H), 4.57 (t, *J* = 7.5 Hz, 2 H), 5.09 (tm, *J* = 6.9 Hz, 1 H), 5.41 (tm, *J* = 7.2 Hz, 1 H); <sup>13</sup>C NMR (75 MHz, CDCl<sub>3</sub>) δ 16.1 (+) (d, *J* = 7 Hz), 16.4 (+), 17.7 (+), 25.7 (+), 26.2 (-), 39.5 (-), 63.6 (-) (d, *J* = 6 Hz), 64.1 (-) (d, *J* = 5 Hz), 118.9 (+) (d, *J* = 7 Hz), 123.6 (+), 131.9 (-), 142.5 (-). The <sup>1</sup>H and <sup>13</sup>C NMR spectra were consistent with those reported,<sup>S8</sup> whereas the <sup>13</sup>C NMR spectrum in the lit.<sup>S9</sup> is corrected.

### (*Z*)-3,7-Dimethylocta-2,6-dien-1-yl diethyl phosphate (**16**)

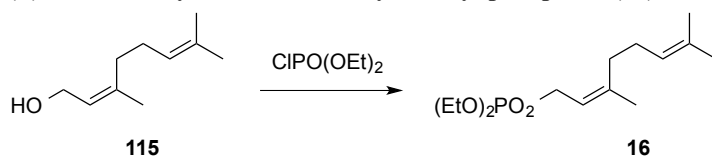

According to GP1 using nerol (**115**) (390 mg, 2.53 mmol), diethyl chlorophosphate (0.55 mL, 3.83 mmol) and *N*-methylimidazole (0.40 mL, 5.07 mmol) in CH<sub>2</sub>Cl<sub>2</sub> (25 mL) at rt for 7 h afforded phosphate **16** (521 mg, 71% yield, >97% *Z* olefin by <sup>13</sup>C NMR): *R*<sub>f</sub> 0.34 (hexane/EtOAc 2:1); <sup>1</sup>H NMR (300 MHz, CDCl<sub>3</sub>) δ 1.33 (dt, *J* = 1.0, 7.2 Hz, 6 H), 1.60 (s, 3 H), 1.68 (s, 3 H), 1.77 (s, 3 H), 2.02–2.16 (m, 4 H), 4.10 (dq, *J* = 8.0, 7.2 Hz, 4 H), 4.54 (t, *J* = 6.9 Hz, 2 H), 5.04–5.13 (m, 1 H), 5.41 (t, *J* = 7.2 Hz, 1 H); <sup>13</sup>C NMR (75 MHz, CDCl<sub>3</sub>) δ 16.1 (+) (d, *J* = 7 Hz), 17.7 (+), 23.5 (+), 25.7 (+), 26.6 (-), 32.1 (-), 63.6 (-) (d, *J* = 6 Hz), 63.8 (-) (d, *J* = 5 Hz), 119.9 (+) (d, *J* = 7 Hz), 123.5 (+), 132.3 (-), 142.7 (-). The <sup>1</sup>H and <sup>13</sup>C NMR spectra were consistent with those reported,<sup>S8</sup> whereas the <sup>13</sup>C NMR spectrum in the lit.<sup>S10</sup> is corrected.

### 5-((*tert*-Butyldimethylsilyloxy)pent-3-yn-2-yl diethyl phosphate (**17**)

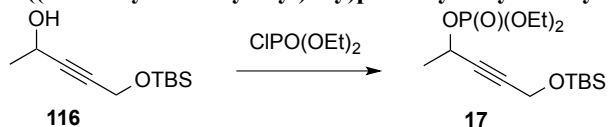

According to GP1 using alcohol **116** (238 mg, 1.11 mmol), diethyl chlorophosphate (0.24 mL, 1.67 mmol) and *N*-methylimidazole (0.158 mL, 2.00 mmol) in CH<sub>2</sub>Cl<sub>2</sub> (5 mL) at rt for 11 h afforded phosphate **17** (361 mg, 92% yield): *R*<sub>f</sub> 0.33 (hexane/EtOAc 2:1); IR (neat) 1261, 1037, 1003, 837 cm<sup>-1</sup>; <sup>1</sup>H NMR (400 MHz, CDCl<sub>3</sub>) δ 0.12 (s, 6 H), 0.91 (s, 9 H), 1.35 (dt, *J* = 2.0, 7.2 Hz, 6 H), 1.57 (d, *J* = 6.4 Hz, 3 H), 4.08–4.20 (m, 4 H), 4.35 (d, *J* = 1.6 Hz, 2 H), 5.09–5.18 (m, 1 H); <sup>13</sup>C NMR (100 MHz, CDCl<sub>3</sub>) δ -5.1 (+), 16.2 (+) (d, *J* = 7 Hz), 18.3 (-), 23.4 (+) (d, *J* = 5 Hz), 25.8 (+), 51.7 (-), 63.9 (-) (d, *J* = 6 Hz), 64.0 (-) (d, *J* = 6 Hz), 64.4 (+) (d, *J* = 5 Hz), 83.0 (-) (d, *J* = 6 Hz), 84.6 (-); HRMS (FAB): *m/z* calcd for C<sub>15</sub>H<sub>32</sub>O<sub>5</sub>PSi [(M+H)<sup>+</sup>] 351.1757, found 351.1767.

### (*R*)-Diethyl (4-(trimethylsilyl)but-3-yn-2-yl) phosphate ((*R*)-**18**)

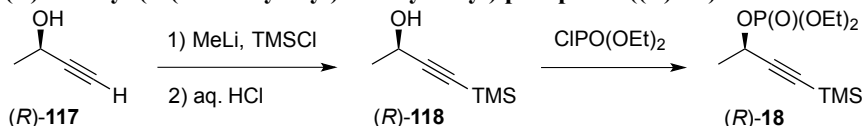

To an ice-cold solution of alcohol (*R*)-**117**<sup>S11</sup> (98% ee by <sup>1</sup>H NMR of the MTPA ester (see part 4 of this supporting info.), 350 mg, 4.99 mmol) in THF (20 mL) was added a solution of MeLi (1.16 M in Et<sub>2</sub>O, 9.50 mL, 11.0 mmol) dropwise. The solution was stirred at rt for 1 h and TMSCl (1.60 mL, 12.6 mmol) was added. The solution was stirred at rt for 1 h and 3 N HCl was carefully added until the mixture became acidic. After being stirred for 30 min at rt, the mixture was extracted with Et<sub>2</sub>O. The extract was washed sequentially with saturated NaHCO<sub>3</sub> and brine, dried over MgSO<sub>4</sub> and concentrated to afford (*R*)-**118**, which was diluted with CH<sub>2</sub>Cl<sub>2</sub> (10 mL). To the CH<sub>2</sub>Cl<sub>2</sub> solution cooled to 0 °C were added *N*-methylimidazole (0.71 mL, 8.99 mmol) and diethyl chlorophosphate (1.08 mL, 7.51 mmol) and the solution was stirred at rt for 5 h. The remaining reagent was quenched by addition of Me<sub>2</sub>N(CH<sub>2</sub>)<sub>3</sub>NH<sub>2</sub> (1.90 mL, 15.2 mmol) and the mixture was stirred at rt for 30 min before addition of saturated NaHCO<sub>3</sub>. The resulting mixture was extracted with CH<sub>2</sub>Cl<sub>2</sub> three times. The combined extracts were washed with brine, dried over MgSO<sub>4</sub> and concentrated to leave an oil, which was purified by chromatography on silica gel (hexane/EtOAc) to afford (*R*)-**18** (1.05 g, 76% yield): [α]<sub>D</sub><sup>21</sup> +51 (*c* 1.03, CHCl<sub>3</sub>); *R*<sub>f</sub> 0.31 (hexane/EtOAc 1:1); IR (neat) 1394, 1034, 989, 847 cm<sup>-1</sup>; <sup>1</sup>H NMR (300 MHz, CDCl<sub>3</sub>) δ 0.13 (s, 9 H), 1.31 (dt, *J* = 1.2, 7.2 Hz, 3 H), 1.32 (dt, *J* = 1.2, 7.2 Hz, 3 H), 1.52 (d, *J* = 6.6 Hz, 3 H), 4.02–4.18 (m, 2 H), 5.06 (dt, *J* = 7.5, 6.6 Hz, 1 H); <sup>13</sup>C NMR (75 MHz, CDCl<sub>3</sub>) δ -0.3 (+), 16.1 (+) (d, *J* = 7 Hz), 23.4 (+), 63.8 (-) (d, *J* = 6.5 Hz), 63.9 (-) (d, *J* = 6.5 Hz), 64.6 (+) (d, *J* = 5 Hz), 90.5 (-), 103.4 (-) (d, *J* = 5 Hz); HRMS (EI): *m/z* calcd for C<sub>11</sub>H<sub>23</sub>O<sub>4</sub>PSi (M<sup>+</sup>) 278.1103, found 278.1098.

### (*R*)-Diethyl (1-(trimethylsilyloxy)oct-1-yn-3-yl) phosphate ((*R*)-**19**)

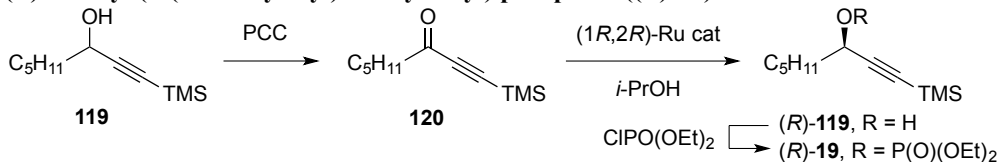

A mixture of alcohol **119** (861 mg, 4.34 mmol), PCC (1.40 g, 6.50 mmol), Celite (2.10 g), and CH<sub>2</sub>Cl<sub>2</sub> (20 mL) was stirred vigorously at rt for 1 h and diluted with hexane. The resulting mixture was filtered through a pad of Celite and the filtrate was concentrated to leave an oil, which was purified by chromatography on silica gel to afford ketone **120** (830 mg, 97% yield). RuCl[(1*R*,2*R*)-TsDPEN](*p*-cymene) (269 mg, 0.423 mmol) was neutralized with KOH in CH<sub>2</sub>Cl<sub>2</sub>, and the mixture was washed with H<sub>2</sub>O, dried over CaH<sub>2</sub> and concentrated under vacuum to afford a residue, which was transferred with *i*-PrOH (6 mL) to a solution of ketone **120** (830 mg, 4.23 mmol) in *i*-PrOH (15 mL). The solution was stirred at rt for 11 h and concentrated. The residue was purified by chromatography on silica gel (hexane/EtOAc) to give alcohol (*R*)-**119** (806 mg, 96% yield), which was 93% ee as determined by <sup>1</sup>H NMR spectroscopy of the derived (*S*)- and (*R*)-MTPA esters: <sup>1</sup>H NMR (400 MHz, CDCl<sub>3</sub>) δ 5.49 (t, *J* = 6.8 Hz, 1 H) (major (*S*)-MTPA ester); δ 5.54 (t, *J* = 6.8 Hz, 1 H) (minor (*R*)-MTPA ester).

According to GP1 using alcohol (*R*)-**119** (93% ee, 188 mg, 0.949 mmol), diethyl chlorophosphate (0.21 mL, 1.46 mmol) and *N*-methylimidazole (0.15 mL, 1.90 mmol) in CH<sub>2</sub>Cl<sub>2</sub> (5 mL) at rt for 2 h afforded a mixture of (*R*)-**19** and remaining chlorophosphate, to which Me<sub>2</sub>N(CH<sub>2</sub>)<sub>3</sub>NH<sub>2</sub> was added. After 30 min at rt, the mixture was diluted with saturated NaHCO<sub>3</sub>. The product was extracted with CH<sub>2</sub>Cl<sub>2</sub> and purified by chromatography on silica



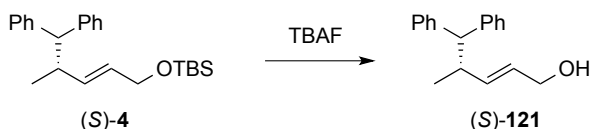

To a solution of above (S)-4 (4.9 mg, 0.013 mmol) in THF (1 mL) was added TBAF (1.0 M in THF, 0.13 mL, 0.13 mmol). The solution was stirred at rt for 15 min and diluted with saturated  $\text{NH}_4\text{Cl}$ . The resulting mixture was extracted with EtOAc twice. The combined extracts were dried over  $\text{MgSO}_4$  and concentrated. The residual oil was purified by chromatography on silica gel (hexane/EtOAc) to afford alcohol (S)-121 (3.3 mg, 98% yield): 96.6% ee by chiral HPLC analysis (Chiralcel AS-H, hexane/*i*-PrOH = 99/1, 0.5 mL/min, 33 °C,  $t_R$  (min) = 36.0 (minor (*R*)-isomer), 41.2 (major (*S*)-isomer));  $R_f$  0.13 (hexane/EtOAc 9:1); IR (neat) 3386, 1598, 1493, 1450, 972, 703  $\text{cm}^{-1}$ ;  $^1\text{H}$  NMR (300 MHz,  $\text{CDCl}_3$ )  $\delta$  0.98 (d,  $J$  = 6.6 Hz, 3 H), 1.42–1.72 (br s, 1 H), 3.00–3.16 (m, 1 H), 3.62 (d,  $J$  = 10.8 Hz, 1 H), 3.84–4.02 (m, 2 H), 5.46–5.63 (m, 1 H), 7.08–7.32 (m, 10 H);  $^{13}\text{C}$  NMR (75 MHz,  $\text{CDCl}_3$ )  $\delta$  19.7 (+), 40.4 (+), 58.8 (+), 63.8 (–), 126.2 (+), 126.3 (+), 128.2 (+), 128.4 (+), 128.5 (+), 128.6 (+), 128.9 (+), 137.5 (+), 143.9 (–), 144.1 (–); HRMS (FAB):  $m/z$  calcd for  $\text{C}_{18}\text{H}_{20}\text{ONa}$  [(M+Na) $^+$ ] 275.1412, found 275.1406.

Determination of the absolute configuration of (S)-4.

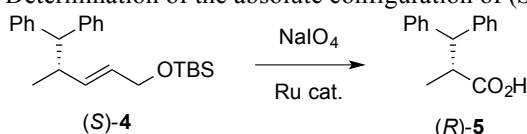

To a suspension of above (S)-4 (132 mg, 0.361 mmol) and  $\text{NaIO}_4$  (1.23 g, 5.77 mmol) in MeCN (4 mL),  $\text{CCl}_4$  (4 mL) and  $\text{H}_2\text{O}$  (6 mL) was added a catalytic amount of  $\text{RuCl}_3 \cdot n\text{H}_2\text{O}$ . The mixture was stirred at rt for 12 h and diluted with  $\text{H}_2\text{O}$ . The resulting mixture was extracted with  $\text{CH}_2\text{Cl}_2$  three times. The combined extracts were dried over  $\text{MgSO}_4$  and concentrated. The residual oil was purified by chromatography on silica gel (hexane/EtOAc) to afford acid (R)-5 (54 mg, 62% yield). The (*R*)-configuration of the acid was determined by comparison of  $[\alpha]_D^{21} +57$  ( $c$  1.25,  $\text{CHCl}_3$ ) with the lit.<sup>S12</sup> values for the (*S*)-isomer ( $[\alpha]_D^{26.5} -52.6 \pm 1.7$  ( $c$  1.578,  $\text{CHCl}_3$ )). Other characterization data of (R)-5:  $R_f$  0.13 (hexane/EtOAc 4:1); IR (neat) 3054, 1710, 1265, 740  $\text{cm}^{-1}$ ;  $^1\text{H}$  NMR (400 MHz,  $\text{CDCl}_3$ )  $\delta$  1.13 (d,  $J$  = 6.8 Hz, 3 H), 3.31 (dq,  $J$  = 11.6, 6.8 Hz, 1 H), 4.06 (d,  $J$  = 11.6 Hz, 1 H), 7.10–7.33 (m, 10 H);  $^{13}\text{C}$  NMR (100 MHz,  $\text{CDCl}_3$ )  $\delta$  17.2 (+), 44.3 (+), 54.7 (+), 126.6 (+), 126.7 (+), 127.6 (+), 128.2 (+), 128.6 (+), 128.8 (+), 142.1 (–), 142.9 (–), 181.4 (–); HRMS (FAB):  $m/z$  calcd for  $\text{C}_{16}\text{H}_{15}\text{O}_2$  [(M-H) $^+$ ] 239.1072, found 239.1072. The  $^1\text{H}$  NMR spectrum was consistent with that reported.<sup>S13</sup>

(*R,E*)-*tert*-Butyldimethyl((4-methyl-5,5-diphenylpent-2-en-1-yl)oxy)silane ((R)-4)

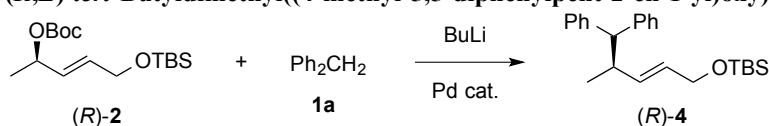

To a solution of 1a (59 mg, 0.35 mmol) in THF (0.5 mL) was added BuLi (1.63 M in hexane, 0.20 mL, 0.33 mmol). The solution was stirred at rt for 15 min and cooled to  $-15$  °C. A solution of (R)-2 (29 mg, 0.092 mmol) and  $\text{Pd}(\text{PPh}_3)_4$  (6 mg, 0.0052 mmol) in THF (0.5 mL) was added to the solution. The solution was stirred at  $-15$  °C for 1 h and diluted with saturated  $\text{NH}_4\text{Cl}$ . The resulting mixture was extracted with EtOAc three times. The combined extracts were washed with brine, dried over  $\text{MgSO}_4$  and concentrated. The residual oil was purified by chromatography on silica gel (hexane/EtOAc) to afford a mixture of (R)-4 and the regioisomer (28 mg, 83% yield. >99% rs by  $^1\text{H}$  NMR). The  $^1\text{H}$  NMR spectrum of (R)-4 was consistent with that of (S)-4 obtained above. The product (5.1 mg, 0.014 mmol) in THF (1 mL) was added TBAF (1.0 M in THF, 0.14 mL, 0.14 mmol), and the mixture was stirred at rt for 15 min to obtain the alcohol (3.1 mg, 88% yield), which showed 91.6% ee by chiral HPLC under the conditions mentioned above.

(*E*)-((4-(9*H*-Xanthen-9-yl)pent-2-en-1-yl)oxy)(*tert*-butyl)dimethylsilane (20)

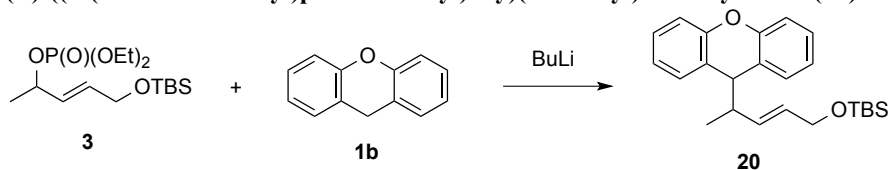

According to GP2 using phosphate 3 (54 mg, 0.15 mmol) in THF (0.7 mL), 9*H*-xanthene (1b) (92 mg, 0.49 mmol) and BuLi (1.55 M in hexane, 0.30 mL, 0.46 mmol) in THF (0.7 mL) at  $-15$  °C for 15 min afforded a



mixture of **20** and the regioisomer (46 mg, 79% yield, 87% rs by  $^1\text{H}$  NMR). The major product **20**:  $R_f$  0.90 (hexane/EtOAc 1:1); IR (neat) 1577, 1478, 1458, 1255, 753  $\text{cm}^{-1}$ ;  $^1\text{H}$  NMR (400 MHz,  $\text{CDCl}_3$ )  $\delta$  -0.05 (s, 6 H), 0.74 (d,  $J$  = 6.9 Hz, 3 H), 0.80 (s, 9 H), 2.34–2.45 (m, 1 H), 3.84 (d,  $J$  = 4.2 Hz, 1 H), 3.96 (d,  $J$  = 5.0 Hz, 2 H), 5.19 (dt,  $J$  = 15.4, 5.0 Hz, 1 H), 5.43 (dd,  $J$  = 15.4, 7.7 Hz, 1 H), 6.89–7.18 (m, 8 H);  $^{13}\text{C}$  NMR (100 MHz,  $\text{CDCl}_3$ )  $\delta$  -5.12 (+), -5.10 (+), 15.7 (+), 18.5 (-), 26.1 (+), 45.5 (+), 46.0 (+), 63.8 (-), nine signals (+) for 10 carbons at 116.18, 116.23, 122.7, 122.9, 127.6, 129.3, 129.5, 129.7 and 132.7, 123.3 (-), 124.2 (-), 152.9 (-), 153.1 (-); HRMS (FAB):  $m/z$  calcd for  $\text{C}_{24}\text{H}_{32}\text{O}_2\text{SiNa}$  [(M+Na) $^+$ ] 403.2069; found 403.2073. Selected signals for the regioisomer:  $^1\text{H}$  NMR (400 MHz,  $\text{CDCl}_3$ )  $\delta$  4.77 (dd,  $J$  = 15.1, 9.0 Hz, 1 H), 4.85 (dq,  $J$  = 15.1, 6.3 Hz, 1 H).

**(E)-((4-(9H-Fluoren-9-yl)pent-2-en-1-yl)oxy)(tert-butyl)dimethylsilane (21)**

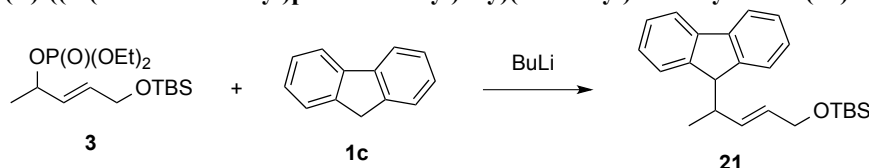

According to GP2 using phosphate **3** (53 mg, 0.15 mmol) in THF (0.7 mL), 9H-fluorene (**1c**) (83 mg, 0.48 mmol) and BuLi (1.55 M in hexane, 0.29 mL, 0.45 mmol) in THF (0.7 mL) at  $-15\text{ }^\circ\text{C}$  for 15 min afforded a mixture of **21** and the regioisomer (45 mg, 81% yield, 85% rs by  $^1\text{H}$  NMR). The major product **21**:  $R_f$  0.87 and 0.70 (hexane/EtOAc 1:1 and 20:1, respectively); IR (neat) 1717, 1611, 1450, 1254  $\text{cm}^{-1}$ ;  $^1\text{H}$  NMR (400 MHz,  $\text{CDCl}_3$ )  $\delta$  -0.04 (s, 6 H), 0.66 (d,  $J$  = 6.8 Hz, 3 H), 0.83 (s, 9 H), 3.02–3.14 (m, 1 H), 3.97 (d,  $J$  = 2.2 Hz, 1 H), 4.07 (d,  $J$  = 5.1 Hz, 1 H), 5.50 (dt,  $J$  = 15.5, 5.1 Hz, 1 H), 5.73 (dd,  $J$  = 15.5, 6.1 Hz, 1 H), 7.13–7.33 (m, 4 H), 7.47 (d,  $J$  = 7.5 Hz, 2 H), 7.66 (d,  $J$  = 7.4 Hz, 2 H);  $^{13}\text{C}$  NMR (100 MHz,  $\text{CDCl}_3$ )  $\delta$  -5.1 (+), 14.7 (+), 18.5 (-), 26.0 (+), 39.4 (+), 52.7 (+), 63.9 (-), eight signals (+) for 10 carbons at 119.7, 124.5, 125.3, 126.6, 126.8, 127.1, 129.1 and 134.2, 141.6 (-), 141.8 (-), 145.3 (-), 146.2 (+); HRMS (FAB):  $m/z$  calcd for  $\text{C}_{24}\text{H}_{32}\text{OSiNa}$  [(M+Na) $^+$ ] 387.2120, found 387.2123. Selected signals for the regioisomer:  $^1\text{H}$  NMR (400 MHz,  $\text{CDCl}_3$ )  $\delta$  1.33 (d,  $J$  = 6.4 Hz, 3 H), 4.78 (dd,  $J$  = 15.2, 8.4 Hz, 1 H), 5.24 (dq,  $J$  = 15.2, 6.4 Hz, 1 H).

**(E)-tert-Butyldimethyl((4-methyl-5,5-di-*p*-tolylpent-2-en-1-yl)oxy)silane (22)**

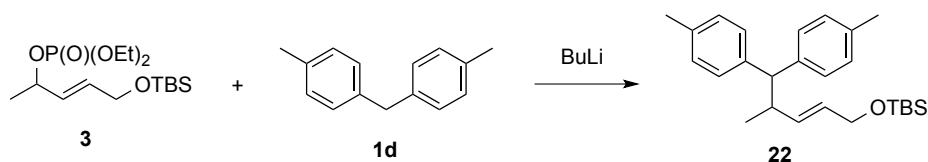

According to GP2 using phosphate **3** (53 mg, 0.15 mmol) in THF (0.7 mL), di-*p*-tolylmethane (**1d**) (98 mg, 0.48 mmol) and BuLi (1.60 M in hexane, 0.28 mL, 0.45 mmol) in THF (0.7 mL) at  $-15\text{ }^\circ\text{C}$  for 15 min afforded a mixture of **22** and the regioisomer (57 mg, 95% yield, 92% rs by  $^1\text{H}$  NMR). The major product **22**:  $R_f$  0.90 (hexane/EtOAc 1:1); IR (neat) 1511, 1461, 1254, 836  $\text{cm}^{-1}$ ;  $^1\text{H}$  NMR (400 MHz,  $\text{CDCl}_3$ )  $\delta$  -0.07 (s, 3 H), -0.06 (s, 3 H), 0.83 (s, 9 H), 0.95 (d,  $J$  = 6.6 Hz, 3 H), 2.24 (s, 3 H), 2.26 (s, 3 H), 2.96–3.08 (m, 1 H), 3.53 (d,  $J$  = 10.6 Hz, 1 H), 3.99 (d,  $J$  = 4.1 Hz, 2 H), 5.41–5.55 (m, 2 H), 6.97–7.21 (m, 8 H);  $^{13}\text{C}$  NMR (100 MHz,  $\text{CDCl}_3$ )  $\delta$  -5.2 (+), 18.4 (-), 19.6 (+), 21.0 (+), 26.0 (+), 39.9 (+), 58.1 (+), 64.1 (-), 127.9 and 128.2 (+), 128.8 (+), 129.0 and 129.2 (+), 135.1 (+), 135.3 and 135.5 (-), 141.3 and 141.6 (-); HRMS (FAB):  $m/z$  calcd for  $\text{C}_{26}\text{H}_{38}\text{OSiNa}$  [(M+Na) $^+$ ] 417.2590, found 417.2579. Selected signals for the regioisomer:  $^1\text{H}$  NMR (400 MHz,  $\text{CDCl}_3$ )  $\delta$  2.83–2.95 (m, 1 H), 5.26 (dd,  $J$  = 15.4, 8.7 Hz, 1 H).

**(E)-tert-Butyldimethyl((4-methyl-5,5,5-triphenylpent-2-en-1-yl)oxy)silane (122)**

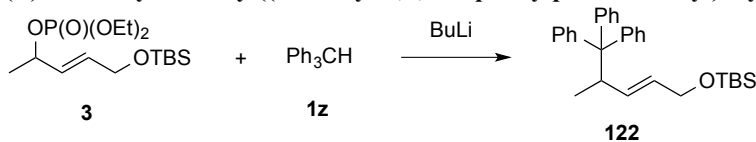

According to GP2 using phosphate **3** (41 mg, 0.116 mmol) in THF (0.5 mL),  $\text{Ph}_3\text{CH}$  (**1z**) (92 mg, 0.377 mmol) and BuLi (1.61 M in hexane, 0.22 mL, 0.354 mmol) in THF (1 mL) at  $-15\text{ }^\circ\text{C}$  for 15 min afforded a mixture of **122** and the regioisomer (32 mg, 61% yield, 84% rs by  $^1\text{H}$  NMR). The major product **122**:  $R_f$  0.85 (hexane/EtOAc 2:1); IR (neat) 1597, 1494, 1254, 836, 704  $\text{cm}^{-1}$ ;  $^1\text{H}$  NMR (300 MHz,  $\text{CDCl}_3$ )  $\delta$  -0.07 (s, 3 H), -0.05 (s, 3 H), 0.82 (s, 9 H), 0.90 (d,  $J$  = 6.4 Hz, 3 H), 4.01 (d,  $J$  = 4.5 Hz, 2 H), 4.14 (quint.,  $J$  = 6.4 Hz, 1 H), 5.45 (dt,  $J$  = 15.6, 4.5 Hz, 1 H), 5.64 (dd,  $J$  = 15.6, 6.3 Hz, 1 H), 7.08–7.42 (m, 15 H);  $^{13}\text{C}$  NMR (75 MHz,  $\text{CDCl}_3$ )  $\delta$  -5.2 (+), 17.2 (+), 18.4 (-),

26.0 (+), 39.0 (+), 61.2 (-), 64.0 (-), 125.6 (+), 127.4 (+), 130.1 (+) (br s), 130.3 (+), 132.5 (+), 145.7 (br s); HRMS (FAB):  $m/z$  calcd for  $C_{30}H_{39}OSi$   $[(M+H)^+]$  443.2770; found 443.2770. Selected signals for the regioisomer:  $^1H$  NMR (300 MHz,  $CDCl_3$ )  $\delta$  -0.11 (s, 3 H), -0.09 (s, 3 H), 0.83 (s, 9 H), 1.58 (dd,  $J$  = 6.3, 1.5 Hz, 3 H), 5.14 (ddq,  $J$  = 15.0, 8.1, 1.5 Hz, 1 H), 5.64 (dq,  $J$  = 15.0, 6.3 Hz, 1 H).

**(E)-4-(5-((tert-Butyldimethylsilyl)oxy)-2-methyl-1-phenylpent-3-en-1-yl)pyridine (23)**

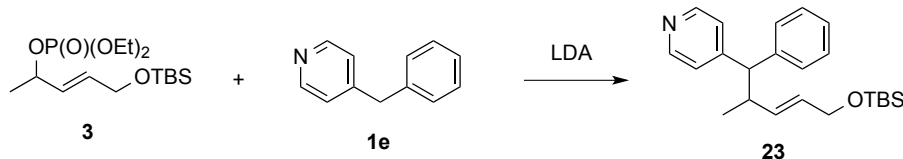

According to GP3 using phosphate **3** (47 mg, 0.13 mmol) in THF (0.5 mL), 4-benzylpyridine (**1e**) (73 mg, 0.43 mmol),  $i$ -Pr<sub>2</sub>NH (0.062 mL, 0.445 mmol) and BuLi (1.55 M in hexane, 0.26 mL, 0.403 mmol) in THF (1.5 mL) at -15 °C for 8 h afforded **23** (37 mg, 78% yield, 92% rs by  $^1H$  NMR), which was a mixture of the diastereomers (51:49 by  $^1H$  NMR):  $R_f$  0.52 (hexane/EtOAc 3:1); IR (neat) 1597, 1416, 1254, 1070, 836  $cm^{-1}$ ;  $^1H$  NMR (400 MHz,  $CDCl_3$ )  $\delta$  -0.071 and -0.055 (2s, 3 H), -0.062 and -0.051 (2s, 3 H), 0.82 (s, 9 x 0.51 H), 0.83 (s, 9 x 0.49 H), 0.97 and 0.98 (2d,  $J$  = 6.6 and 6.6 Hz, 3 H), 3.00–3.14 (m, 1 H), 3.59 and 3.60 (2d,  $J$  = 10.8 and 10.5 Hz, 1 H), 3.94–4.04 (m, 2 H), 5.42–5.54 (m, 2 H), 7.12–7.32 (m, 7 H), 8.42–8.50 (m, 2 H);  $^{13}C$  NMR (100 MHz,  $CDCl_3$ )  $\delta$  -5.2 (+), 18.4 (-), 19.4 and 19.5 (+), 25.9 and 26.0 (+), 39.4 and 39.7 (+), 58.3 (+), 63.6 and 63.7 (-), 123.6 and 123.9 (+), 126.7 and 126.8 (+), 128.2 and 128.5 (+), 128.6 and 128.8 (+), 129.7 and 129.9 (+), 133.5 and 133.6 (+), 142.1 and 142.4 (-), 149.8 and 150.0 (+), 152.9 and 153.1 (-); HRMS (FAB)  $m/z$  calcd for  $C_{23}H_{34}NOSi$   $[(M+H)^+]$  368.2410, found 368.2405.

**(E)-2-(5-((tert-Butyldimethylsilyl)oxy)-2-methyl-1-phenylpent-3-en-1-yl)pyridine (24)**

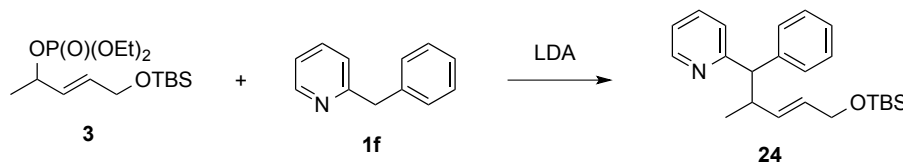

According to GP3 using phosphate **3** (49 mg, 0.139 mmol) in THF (0.5 mL), 2-benzylpyridine (**1f**) (76 mg, 0.45 mmol),  $i$ -Pr<sub>2</sub>NH (0.061 mL, 0.435 mmol) and BuLi (1.55 M in hexane, 0.27 mL, 0.42 mmol) in THF (1.5 mL) at -15 °C for 15 min afforded **24** (43 mg, 84% yield, 94% rs by  $^1H$  NMR), which was a mixture of the diastereomers (51:49 by  $^1H$  NMR):  $R_f$  0.72 (hexane/EtOAc 3:1); IR (neat) 1588, 1471, 1433, 1254  $cm^{-1}$ ;  $^1H$  NMR (400 MHz,  $CDCl_3$ )  $\delta$  -0.07 (s, 6 x 0.51 H), -0.06 (s, 6 x 0.49 H), 0.83 (s, 9 H), 0.90–0.98 (m, 3 H), 3.23–3.38 (m, 1 H), 3.75 (d,  $J$  = 10.8 Hz, 1 H), 3.92–4.00 (m, 2 H), 5.38–5.56 (m, 2 H), 6.98–7.57 (m, 8 H), 8.52 and 8.57 (2d,  $J$  = 4.5 and 4.4 Hz, 1 H);  $^{13}C$  NMR (100 MHz,  $CDCl_3$ )  $\delta$  -5.2 and -5.1 (+), 18.40 and 18.42 (-), 19.1 and 19.3 (+), 26.0 (+), 40.06 and 40.11 (+), 60.8 and 60.9 (+), 63.89 and 63.93 (-), 121.2 and 121.3 (+), 123.49 and 123.50 (+), 126.3 and 126.5 (+), six signals (+) for 3 carbons at 128.3, 128.46 (+), 128.52, 128.7, 129.06, and 129.14, 134.4 and 134.6 (+), 136.2 and 136.4 (+), 142.69 and 142.73 (-), 149.3 and 149.5 (+), 163.1 and 163.2 (-); HRMS (FAB):  $m/z$  calcd for  $C_{23}H_{34}NOSi$   $[(M+H)^+]$  368.2410, found 368.2411.

**(E)-((4-Benzhydrylhex-2-en-1-yl)oxy)(tert-butyl)dimethylsilane (25)**

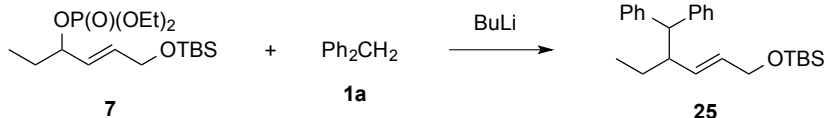

According to GP2 using phosphate **7** (47 mg, 0.13 mmol) in THF (0.7 mL), **1a** (72 mg, 0.41 mmol) and BuLi (1.63 M in hexane, 0.24 mL, 0.39 mmol) in THF (0.7 mL) at -15 °C for 15 min afforded **25** (39 mg, 80% yield, 91% rs by  $^1H$  NMR):  $R_f$  0.90 (hexane/EtOAc 1:1); IR (neat) 1599, 1494, 1451, 1255, 1075  $cm^{-1}$ ;  $^1H$  NMR (400 MHz,  $CDCl_3$ )  $\delta$  -0.082 (s, 3 H), -0.077 (s, 3 H), 0.82 (t,  $J$  = 7.5 Hz, 3 H), 0.83 (s, 9 H), 1.04–1.20 (m, 1 H), 1.39–1.51 (m, 1 H), 2.73–2.84 (m, 1 H), 3.73 (d,  $J$  = 10.6 Hz, 1 H), 3.97 (dd,  $J$  = 5.0, 1.4 Hz, 2 H), 5.28 (ddt,  $J$  = 15.4, 8.8, 1.4 Hz, 1 H), 5.42 (dt,  $J$  = 15.4, 5.0 Hz, 1 H), 7.04–7.31 (m, 10 H);  $^{13}C$  NMR (100 MHz,  $CDCl_3$ )  $\delta$  -5.21 (+), -5.19 (+), 11.7 (+), 18.4 (-), 26.0 (+), 26.1 (-), 47.9 (+), 57.2 (+), 63.8 (-), 125.9 (+), 126.1 (+), 128.25 (+), 128.26 (+), 128.5 (+), 128.6 (+), 131.3 (+), 132.6 (+), 144.1 (-), 144.4 (-); HRMS (FAB):  $m/z$  calcd for  $C_{25}H_{36}OSiNa$   $[(M+Na)^+]$  403.2433, found 403.2434.

**(E)-((2-Benzhydryl-5-methylhex-3-en-1-yl)oxy)(tert-butyl)dimethylsilane (26)**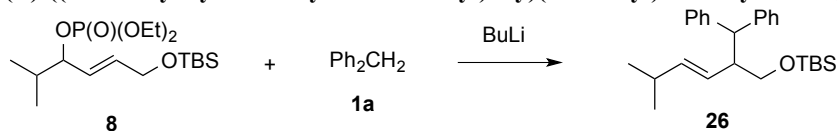

According to GP2 using phosphate **8** (28 mg, 0.0746 mmol) in THF (0.5 mL), **1a** (41 mg, 0.241 mmol) and BuLi (1.60 M in hexane, 0.14 mL, 0.224 mmol) in THF (0.5 mL) at  $-15\text{ }^{\circ}\text{C}$  for 1 h afforded a mixture of **26** and the regioisomer (23 mg, 77% yield, 81% rs by  $^1\text{H}$  NMR). The major product **26**:  $R_f$  0.85 and 0.51 (hexane/EtOAc 1:1 and 20:1, respectively); IR (neat) 1470, 1253, 1106, 835  $\text{cm}^{-1}$ ;  $^1\text{H}$  NMR (400 MHz,  $\text{CDCl}_3$ )  $\delta$   $-0.08$  (s, 3 H),  $-0.05$  (s, 3 H), 0.73 (d,  $J = 6.7$  Hz, 3 H), 0.81 (d,  $J = 6.7$  Hz, 3 H), 0.88 (s, 9 H), 2.08 (d of sext,  $J = 6.6, 6.7$  Hz, 1 H), 2.85–2.96 (m, 1 H), 3.42 (dd,  $J = 9.7, 5.2$  Hz, 1 H), 3.51 (dd,  $J = 9.7, 3.8$  Hz, 1 H), 4.04 (d,  $J = 10.3$  Hz, 2 H), 5.18 (dd,  $J = 15.5, 8.3$  Hz, 1 H), 5.27 (dd,  $J = 15.5, 6.6$  Hz, 1 H), 7.04–7.35 (m, 10 H);  $^{13}\text{C}$  NMR (100 MHz,  $\text{CDCl}_3$ )  $\delta$   $-5.43$  (+),  $-5.35$  (+), 18.4 (–), 22.4 (+), 22.5 (+), 26.0 (+), 31.2 (+), 49.0 (+), 52.5 (+), 65.2 (–), 125.8 (+), 126.1 (+), 127.5 (+), 128.0 (+), 128.38 (+), 128.43 (+), 129.2 (+), 140.0 (+), 143.7 (–), 144.1 (–); HRMS (FAB):  $m/z$  calcd for  $\text{C}_{26}\text{H}_{37}\text{OSi}$  [(M–H) $^+$ ] 393.2614, found 393.2621. Selected signals for the minor product:  $^1\text{H}$  NMR (400 MHz,  $\text{CDCl}_3$ )  $\delta$   $-0.10$  (s, 3 H),  $-0.09$  (s, 3 H), 5.64 (dd,  $J = 15.3, 7.2$  Hz, 1 H), 5.77 (dt,  $J = 15.3, 4.3$  Hz, 1 H).

**(2-Ethylbut-3-ene-1,1-diyl)dibenzene (27)**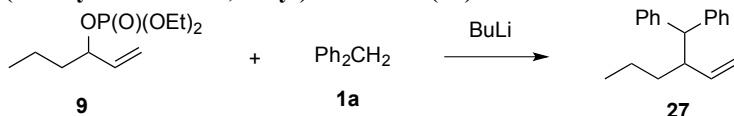

The general procedure GP2 was applied to this reaction except for reaction temperature of  $-78\text{ }^{\circ}\text{C}$ . Briefly, phosphate **9** (24 mg, 0.10 mmol) in THF (1.0 mL) was added to a mixture of **1a** (56 mg, 0.33 mmol) and BuLi (1.60 M in hexane, 0.20 mL, 0.32 mmol) in THF (4.0 mL) at  $-78\text{ }^{\circ}\text{C}$  and the solution was stirred for 15 min to afford a mixture of **27** and the regioisomer **34** (20 mg, 81% yield, 78% rs by  $^1\text{H}$  NMR). The major product **27**:  $R_f$  0.87 (hexane/EtOAc 1:1);  $^1\text{H}$  NMR (400 MHz,  $\text{CDCl}_3$ )  $\delta$  0.80 (t,  $J = 7.0$  Hz, 3 H), 1.06–1.46 (m, 4 H), 2.83–2.93 (m, 1 H), 3.72 (d,  $J = 10.6$  Hz, 2 H), 4.88 (dd,  $J = 16.9, 1.9$  Hz, 1 H), 4.90 (dd,  $J = 10.5, 1.9$  Hz, 1 H), 5.44 (ddd,  $J = 16.9, 10.5, 9.1$  Hz, 1 H). Selected signals for the regioisomer **34**:  $^1\text{H}$  NMR (400 MHz,  $\text{CDCl}_3$ )  $\delta$  2.74 (dd,  $J = 7.8, 6.6$  Hz, 2 H), 3.95 (t,  $J = 7.8$  Hz, 1 H). The  $^1\text{H}$  NMR spectrum of **34** was consistent with that of the same compound obtained from phosphate **14** and **1a** (vide infra).

**(R,E)-(3-Benzhydryloct-1-en-1-yl)trimethylsilane ((R)-28)**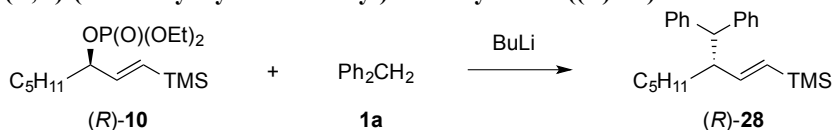

According to GP2 using phosphate **(R)-10** (98% ee, 46 mg, 0.137 mmol) in THF (1 mL), **1a** (73 mg, 0.435 mmol) and BuLi (1.60 M in hexane, 0.26 mL, 0.416 mmol) in THF (1 mL) at  $-15\text{ }^{\circ}\text{C}$  for 15 min afforded **(R)-28** (38 mg, 80% yield, >99% rs by  $^1\text{H}$  NMR): 96% ee as determined by HPLC analysis (Chiralcel OJ-H, hexane/*i*-PrOH = 99.5/0.5, 0.1 mL/min,  $35\text{ }^{\circ}\text{C}$ ,  $t_R$  (min) = 54.2 (major *(R)*-isomer), 61.9 (minor *(S)*-isomer);  $[\alpha]_D^{21}$   $-50$  ( $c$  0.86,  $\text{CHCl}_3$ );  $R_f$  0.81 (hexane/EtOAc 3:1); IR (neat) 1616, 1495, 1451, 1247, 868, 838, 701  $\text{cm}^{-1}$ ;  $^1\text{H}$  NMR (400 MHz,  $\text{CDCl}_3$ )  $\delta$  0.15 (s, 9 H), 1.11 (t,  $J = 6.8$  Hz, 3 H), 1.34–1.74 (m, 8 H), 3.06–3.17 (m, 1 H), 4.00 (d,  $J = 10.4$  Hz, 1 H), 5.70 (d,  $J = 18.4$  Hz, 1 H), 5.87 (dd,  $J = 18.4, 8.4$  Hz, 1 H), 7.31–7.61 (m, 10 H);  $^{13}\text{C}$  NMR (100 MHz,  $\text{CDCl}_3$ )  $\delta$   $-1.3$  (+), 14.1 (+), 22.6 (–), 26.9 (–), 31.8 (–), 32.7 (–), 51.1 (+), 57.5 (+), 125.8 (+), 126.1 (+), 128.0 (+), 128.4 (+), 128.5 (+), 128.7 (+), 131.8 (+), 144.1 (–), 144.2 (–), 149.2 (+); HRMS (EI):  $m/z$  calcd for  $\text{C}_{24}\text{H}_{34}\text{Si}$  ( $\text{M}^+$ ) 350.2430, found 350.2429.

**trans-((4-Benzhydrylcyclopent-2-en-1-yl)oxy)(tert-butyl)dimethylsilane (30a)**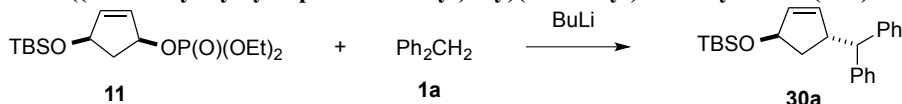

According to GP2 using phosphate **11** (35 mg, 0.100 mmol) in THF (0.5 mL), **1a** (60 mg, 0.36 mmol) and

BuLi (1.63 M in hexane, 0.19 mL, 0.31 mmol) in THF (0.5 mL) at  $-15^{\circ}\text{C}$  for 15 min afforded a mixture of **30a**, cis isomer **31a** and the regioisomer **32a** in a ratio of 87:1:12 by  $^1\text{H}$  NMR (26 mg, 71% yield). The major product **30a**:  $R_f$  0.92 (hexane/EtOAc 1:1); IR (neat) 1716, 1495, 1450, 1254, 1046  $\text{cm}^{-1}$ ;  $^1\text{H}$  NMR (400 MHz,  $\text{CDCl}_3$ )  $\delta$  0.03 (s, 6 H), 0.86 (s, 9 H), 1.77–1.91 (m, 2 H), 3.52 (d,  $J = 11.2$  Hz, 1 H), 3.75–3.85 (m, 1 H), 4.82–4.90 (m, 1 H), 5.67 (dm,  $J = 5.7$  Hz, 1 H), 5.72 (dt,  $J = 5.7, 2.0$  Hz, 1 H), 7.12–7.31 (m, 10 H);  $^{13}\text{C}$  NMR (100 MHz,  $\text{CDCl}_3$ )  $\delta$  -4.5 (+), 18.4 (-), 26.1 (+), 40.0 (-), 48.8 (+), 58.2 (+), 77.4 (+), 126.27 (+), 126.28 (+), 128.07 (+), 128.15 (+), 128.51 (+), 128.53 (+), 134.1 (+), 137.4 (+), 144.3 (-), 144.6 (-); HRMS (FAB):  $m/z$  calcd for  $\text{C}_{24}\text{H}_{32}\text{OSiNa}$  [(M+Na) $^+$ ] 387.2120, found 387.2120.

**trans-4-((4-((tert-Butyldimethylsilyloxy)cyclopent-2-en-1-yl)(phenyl)methyl)pyridine (30e)**

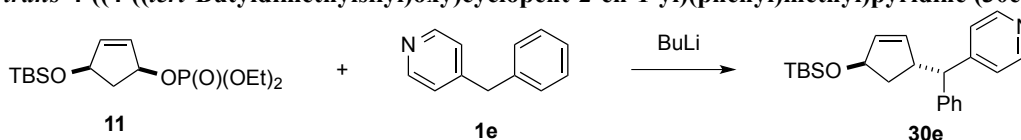

According to GP3 using phosphate **11** (49 mg, 0.14 mmol) in THF (0.5 mL), **1e** (76 mg, 0.45 mmol),  $i\text{-Pr}_2\text{NH}$  (0.061 mL, 0.44 mmol) and BuLi (1.55 M in hexane, 0.27 mL, 0.42 mmol) in THF (1.5 mL) at  $-15^{\circ}\text{C}$  for 15 min afforded a mixture of **30e**, cis isomer **31e** and the regioisomer **32e** in a ratio of 91:4:5 by  $^1\text{H}$  NMR (76 mg, 86% yield). The major product **30e**: diastereomeric ratio 53:47 by  $^1\text{H}$  NMR;  $R_f$  0.65 and 0.70 (hexane/EtOAc 1:1); IR (neat) 1593, 1254, 1068, 1046  $\text{cm}^{-1}$ ;  $^1\text{H}$  NMR (400 MHz,  $\text{CDCl}_3$ )  $\delta$  0.034 and 0.038 (2s, 6 H), 0.86 (s, 9 x 0.47 H), 0.87 (s, 9 x 0.53 H), 1.71–1.91 (m, 2 H), 3.51 and 3.52 (2d,  $J = 11.2$  and 11.1 Hz, 1 H), 3.73–3.84 (m, 1 H), 4.81–4.88 (m, 1 H), 5.63 and 5.64 (2dm,  $J = 6.3$  and 6.4 Hz, 1 H), 5.73–5.79 (m, 1 H), 7.15–7.34 (m, 7 H), 8.49 and 8.50 (2d,  $J = 6.2$  and 6.0 Hz, 2 H);  $^{13}\text{C}$  NMR (100 MHz,  $\text{CDCl}_3$ )  $\delta$  -4.55 and -4.53 (+), 18.37 and 18.38 (-), 26.0 (+), 39.8 and 39.9 (-), 48.2 (+), 57.49 and 57.52 (+), 123.4 and 123.5 (+), 126.9 (+), 128.08 and 128.11 (+), 128.8 (+), 134.8 and 135.0 (+), 136.3 and 136.5 (+), 142.4 and 142.7 (-), 149.96 and 150.01 (+), 153.0 and 153.2 (-); HRMS (FAB):  $m/z$  calcd for  $\text{C}_{23}\text{H}_{32}\text{NOSi}$  [(M+H) $^+$ ] 366.2253, found 366.2258.

**(((1R,4S)-4-Benzhydrylcyclopent-2-en-1-yl)oxy)(tert-butyl)dimethylsilane (31a)**

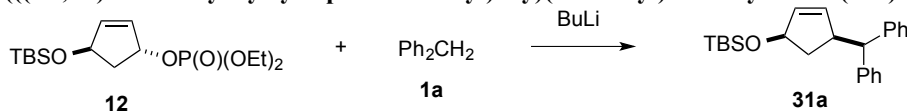

According to GP2 using phosphate **12** (48 mg, 0.137 mmol) in THF (1 mL), **1a** (75 mg, 0.446 mmol) and BuLi (1.55 M in hexane, 0.27 mL, 0.42 mmol) in THF (1 mL) at  $-15^{\circ}\text{C}$  for 1 h afforded a mixture of **31a**, trans isomer **30a** and the regioisomer **32a** in a ratio of 97:2:1 by  $^1\text{H}$  NMR (35 mg, 70% yield). The major product **31a**:  $R_f$  0.92 (hexane/EtOAc 1:1); IR (neat) 1252, 1089, 836, 701  $\text{cm}^{-1}$ ;  $^1\text{H}$  NMR (300 MHz,  $\text{CDCl}_3$ )  $\delta$  0.03 (s, 3 H), 0.05 (s, 3 H), 0.88 (s, 9 H), 1.32 (dt,  $J = 13.4, 6.0$  Hz, 1 H), 2.27 (dt,  $J = 13.4, 7.2$  Hz, 1 H), 3.32–3.44 (m, 1 H), 3.73 (d,  $J = 11.4$  Hz, 1 H), 4.78–4.86 (m, 1 H), 5.60 (dt,  $J = 5.7, 1.5$  Hz, 1 H), 5.71 (dt,  $J = 5.7, 2.1$  Hz, 1 H), 7.10–7.32 (m, 10 H);  $^{13}\text{C}$  NMR (75 MHz,  $\text{CDCl}_3$ )  $\delta$  -4.6 (+), -4.5 (+), 18.3 (-), 26.0 (+), 40.6 (-), 48.7 (+), 58.8 (+), 77.5 (+), 126.2 (+), 126.06 (+), 128.11 (+), 128.51 (+), 128.55 (+), 134.9 (+), 135.8 (+), 144.2 (-), 144.4 (-); HRMS (FAB):  $m/z$  calcd for  $\text{C}_{24}\text{H}_{31}\text{OSi}$  [(M-H) $^+$ ] 363.2144, found 363.2147.

**cis-4-((4-((tert-Butyldimethylsilyloxy)cyclopent-2-en-1-yl)(phenyl)methyl)pyridine (31e)**

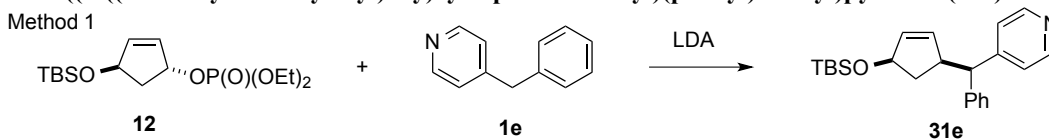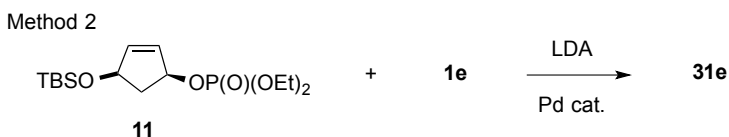

**Method 1:** According to GP3 using phosphate **12** (48 mg, 0.137 mmol) in THF (0.5 mL), **1e** (76 mg, 0.45 mmol),  $i\text{-Pr}_2\text{NH}$  (0.061 mL, 0.44 mmol) and BuLi (1.55 M in hexane, 0.27 mL, 0.42 mmol) in THF (1.5 mL) at  $-15^{\circ}\text{C}$  for 1 h afforded a mixture of **31e** and the regioisomer **32e** in a ratio of 99:1 by  $^1\text{H}$  NMR (45 mg, 89% yield,

56:44 dr).

**Method 2:** A solution of LDA in THF (1 mL) was prepared from *i*-Pr<sub>2</sub>NH (0.061 mL, 0.435 mmol) and BuLi (1.55 M in hexane, 0.27 mL, 0.419 mmol) (0 °C, 1 h). To this solution was added **1e** (75 mg, 0.443 mmol) in THF (0.5 mL). The solution was stirred at 0 °C for 15 min and cooled to -15 °C. Pd(PPh<sub>3</sub>)<sub>4</sub> (8 mg, 0.007 mmol) and a THF solution (0.5 mL) of phosphate **11** (49 mg, 0.140 mmol) were added to the solution. The solution was stirred at -15 °C for 15 min and diluted with saturated NH<sub>4</sub>Cl. The resulting mixture was extracted with hexane three times. The combined extracts were washed with brine, dried over MgSO<sub>4</sub> and concentrated. The residual oil was purified by chromatography on silica gel (hexane/EtOAc) to afford a mixture of **31e** and the regioisomer **32e** in a ratio of >99:1 by <sup>1</sup>H NMR (41 mg, 78% yield, 57:43 dr).

The product **31e** obtained by Methods 1 and 2 were combined and purified again by chromatography for characterization: diastereomeric ratio, 61:39 by <sup>1</sup>H NMR; *R*<sub>f</sub> 0.53 and 0.64 (hexane/EtOAc 2:1); IR (neat) 1594, 1368, 1256, 1092 cm<sup>-1</sup>; <sup>1</sup>H NMR (400 MHz, CDCl<sub>3</sub>) δ 0.030 (s, 3 x 0.61 H), 0.035 (s, 3 x 0.39 H), 0.055 (s, 3 H), 0.88 (s, 9 H), 1.22–1.38 (m, 1 H), 2.24–2.33 (m, 1 H), 3.33–3.43 (m, 1 H), 3.73 (d, *J* = 11.5 Hz, 1 H), 4.78–4.87 (m, 1 H), 5.55–5.61 (m, 1 H), 5.73–5.80 (m, 1 H), 7.18–7.34 (m, 7 H), 8.45–8.52 (m, 2 H); <sup>13</sup>C NMR (100 MHz, CDCl<sub>3</sub>) δ -4.6 (+), 18.3 (-), 26.0 (+), 40.2 and 40.3 (-), 48.00 and 48.02 (+), 58.1 and 58.2 (+), 77.3 (+), 123.45 and 123.52 (+), 126.9 (+), 128.0 and 128.1 (+), 128.79 and 128.82 (+), 134.8 and 135.1 (+), 135.4 and 135.7 (+), 142.4 and 142.6 (-), 149.97 and 150.02 (+), 152.9 and 153.1 (-); HRMS (FAB): *m/z* calcd for C<sub>23</sub>H<sub>32</sub>NOSi [(M+H)<sup>+</sup>] 366.2253, found 366.2254.

### But-3-ene-1,1-diyl dibenzene (**33**)

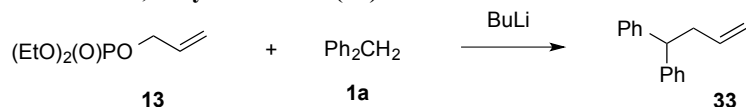

According to GP2 using phosphate **13** (39 mg, 0.201 mmol) in THF (1 mL), **1a** (118 mg, 0.701 mmol) and BuLi (1.60 M in hexane, 0.38 mL, 0.608 mmol) in THF (1 mL) at -15 °C for 15 min afforded **33** (34 mg, 81% yield): *R*<sub>f</sub> 0.90 (hexane/EtOAc 1:2); <sup>1</sup>H NMR (300 MHz, CDCl<sub>3</sub>) δ 2.82 (dt, *J* = 8.1, 6.7 Hz, 2 H), 4.01 (t, *J* = 8.1 Hz, 1 H), 4.94 (d, *J* = 11.1 Hz, 1 H), 5.01 (d, *J* = 17.1 Hz, 1 H), 5.54 (ddt, *J* = 17.1, 11.1, 6.7 Hz, 1 H); <sup>13</sup>C NMR (75 MHz, CDCl<sub>3</sub>) δ 40.0 (-), 51.3 (+), 116.4 (-), 126.3 (+), 128.0 (+), 128.5 (+), 136.9 (+), 144.6 (-). The <sup>1</sup>H and <sup>13</sup>C NMR spectra were consistent with those reported.<sup>S14-S16</sup>

### (E)-Hept-3-ene-1,1-diyl dibenzene (**34**)

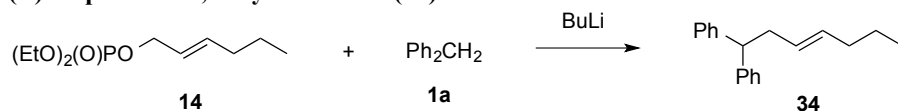

According to GP2 using phosphate **14** (15 mg, 0.065 mmol) in THF (0.5 mL), **1a** (35.3 mg, 0.210 mmol) and BuLi (1.60 M in hexane, 0.12 mL, 0.192 mmol) in THF (0.5 mL) at -15 °C for 15 min afforded **34** (14 mg, 86% yield, >99% rs by <sup>1</sup>H NMR): *R*<sub>f</sub> 0.93 and 0.45 (hexane/EtOAc 1:1 and 20:1, respectively); IR (neat) 1494, 1450, 968, 699 cm<sup>-1</sup>; <sup>1</sup>H NMR (400 MHz, CDCl<sub>3</sub>) δ 0.77 (t, *J* = 7.4 Hz, 3 H), 1.26 (tq, *J* = 7.2, 7.4 Hz, 2 H), 1.87 (dt, *J* = 6.6, 7.2 Hz, 2 H), 2.74 (dd, *J* = 7.8, 6.6 Hz, 2 H), 3.95 (t, *J* = 7.8 Hz, 1 H), 5.30 (dt, *J* = 15.2, 6.6 Hz, 1 H), 5.40 (dt, *J* = 15.2, 6.6 Hz, 1 H), 7.13–7.29 (m, 10 H); <sup>13</sup>C NMR (100 MHz, CDCl<sub>3</sub>) δ 13.6 (+), 22.6 (-), 34.7 (-), 38.9 (-), 51.8 (+), 126.1 (+), 128.1 (+), 128.3 (+), 128.4 (+), 132.4 (+), 144.9 (-); HRMS (EI): *m/z* calcd for C<sub>19</sub>H<sub>22</sub> [M<sup>+</sup>] 250.1722, found 250.1721.

### (E)-(4,8-Dimethylnona-3,7-diene-1,1-diyl) dibenzene (**35**)

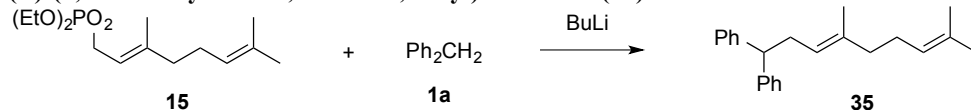

According to GP2 using phosphate **15** (491 mg, 1.69 mmol) in THF (1 mL), **1a** (910 mg, 5.41 mmol) and BuLi (1.63 M in hexane, 3.11 mL, 5.07 mmol) in THF (11 mL) at -15 °C for 15 min afforded **35** (409 mg, 80% yield, >99% rs and 98% *E* olefin by <sup>1</sup>H and <sup>13</sup>C NMR): *R*<sub>f</sub> 0.90 (hexane/EtOAc 2:1); IR (neat) 1600, 1494, 1449, 699 cm<sup>-1</sup>; <sup>1</sup>H NMR (300 MHz, CDCl<sub>3</sub>) δ 1.54 (s, 3 H), 1.55 (s, 3 H), 1.64 (s, 3 H), 1.86–2.03 (m, 4 H), 2.73 (t, *J* = 7.5 Hz, 2 H), 3.94 (t, *J* = 7.8 Hz, 1 H), 4.99 (t, *J* = 6.2 Hz, 1 H), 5.07 (t, *J* = 7.0 Hz, 1 H), 7.12–7.30 (m, 10 H); <sup>13</sup>C NMR (75 MHz, CDCl<sub>3</sub>) δ 16.2 (+), 17.7 (+), 25.8 (+), 26.6 (-), 34.3 (-), 39.8 (-), 51.5 (+), 122.7 (+), 124.3 (+), 126.1

(+), 128.1 (+), 128.3 (+), 131.3 (-), 136.3 (-), 145.0 (-). The  $^1\text{H}$  NMR spectrum is corrected as presented above, while the  $^{13}\text{C}$  NMR spectrum is consistent with that reported.<sup>S17</sup>

#### (*E*)-4-(4,8-Dimethyl-1-phenylnona-3,7-dien-1-yl)pyridine (**36**)

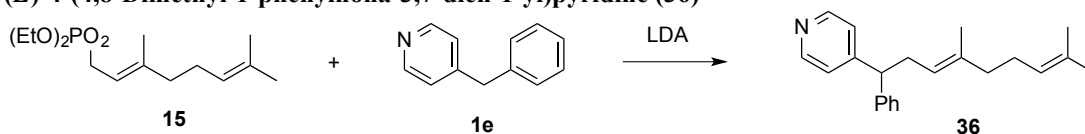

According to GP3 using phosphate **15** (484 mg, 1.67 mmol) in THF (1 mL), **1e** (903 mg, 5.34 mmol), *i*-Pr<sub>2</sub>NH (0.73 mL, 5.21 mmol) and BuLi (1.63 M in hexane, 3.07 mL, 5.00 mmol) in THF (10 mL) at  $-15\text{ }^\circ\text{C}$  for 15 min afforded **36** (383 mg, 75% yield, >99% rs and 98% *E* olefin by  $^1\text{H}$  and  $^{13}\text{C}$  NMR):  $R_f$  0.57 (hexane/EtOAc 2:1); IR (neat) 1596, 1451, 1414, 739, 700  $\text{cm}^{-1}$ ;  $^1\text{H}$  NMR (400 MHz,  $\text{CDCl}_3$ )  $\delta$  1.53 (s, 3 H), 1.55 (s, 3 H), 1.64 (d,  $J = 0.8$  Hz, 3 H), 1.88–2.10 (m, 4 H), 2.73 (t,  $J = 7.6$  Hz, 2 H), 3.92 (t,  $J = 7.6$  Hz, 1 H), 4.96–5.07 (m, 2 H), 7.12–7.33 (m, 7 H), 8.48 (dd,  $J = 4.4$  Hz, 1.2 Hz, 2 H);  $^{13}\text{C}$  NMR (75 MHz,  $\text{CDCl}_3$ )  $\delta$  16.2 (+), 17.7 (+), 25.7 (+), 26.5 (-), 33.6 (-), 39.7 (-), 51.0 (+), 121.6 (+), 123.6 (+) (br s), 124.1 (+), 126.7 (+), 128.0 (+), 128.6 (+), 131.4 (-), 137.2 (-), 143.1 (-), 149.7 (+), 153.8 (-); HRMS (EI):  $m/z$  calcd for  $\text{C}_{22}\text{H}_{27}\text{N}$  ( $M^+$ ) 305.2144, found 305.2144. The  $^1\text{H}$  and  $^{13}\text{C}$  NMR spectra in the lit.<sup>S14</sup> are corrected as presented above.

#### (*Z*)-4-(4,8-Dimethylnona-3,7-diene-1,1-diyl)dibenzene (**37**)

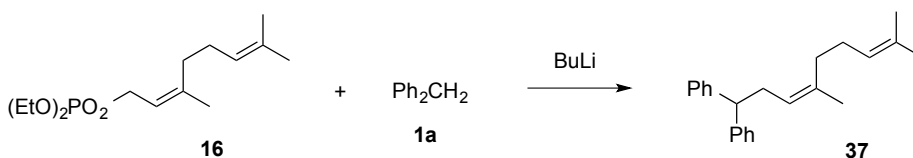

According to GP2 using phosphate **16** (41 mg, 0.141 mmol) in THF (1 mL), **1a** (75 mg, 0.446 mmol) and BuLi (1.55 M in hexane, 0.27 mL, 0.42 mmol) in THF (1 mL) at  $-15\text{ }^\circ\text{C}$  for 15 min afforded **37** (34 mg, 80% yield, >99% rs and 98% *Z* olefin by  $^1\text{H}$  and  $^{13}\text{C}$  NMR):  $R_f$  0.83 (hexane/EtOAc 2:1); IR (neat) 1600, 1495, 1449, 1376, 699  $\text{cm}^{-1}$ ;  $^1\text{H}$  NMR (300 MHz,  $\text{CDCl}_3$ )  $\delta$  1.60 (s, 3 H), 1.61 (d,  $J = 1.5$  Hz, 3 H), 1.69 (s, 3 H), 1.97–2.08 (m, 4 H), 2.74 (t,  $J = 7.6$  Hz, 2 H), 3.92 (t,  $J = 7.8$  Hz, 1 H), 5.02–5.16 (m, 2 H), 7.12–7.32 (m, 10 H);  $^{13}\text{C}$  NMR (75 MHz,  $\text{CDCl}_3$ )  $\delta$  17.8 (+), 23.4 (+), 25.8 (+), 26.5 (-), 32.2 (-), 34.1 (-), 51.8 (+), 123.3 (+), 124.4 (+), 126.1 (+), 128.1 (+), 128.4 (+), 131.7 (-), 136.5 (-), 145.0 (-); HRMS (EI):  $m/z$  calcd for  $\text{C}_{23}\text{H}_{28}$  ( $M^+$ ) 304.2191, found 304.2191

#### (*Z*)-4-(4,8-Dimethyl-1-phenylnona-3,7-dien-1-yl)pyridine (**38**)

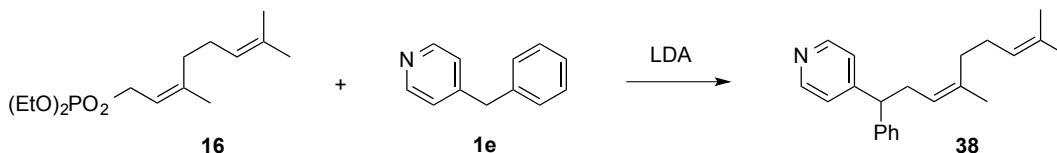

According to GP3 using phosphate **16** (40 mg, 0.138 mmol) in THF (0.5 mL), **1e** (74 mg, 0.437 mmol), *i*-Pr<sub>2</sub>NH (0.061 mL, 0.43 mmol) and BuLi (1.55 M in hexane, 0.27 mL, 0.42 mmol) in THF (1.5 mL) at  $-15\text{ }^\circ\text{C}$  for 15 min afforded **38** (33 mg, 79% yield, >99% rs and 98% *Z* olefin by  $^1\text{H}$  and  $^{13}\text{C}$  NMR):  $R_f$  0.47 (hexane/EtOAc 3:1); IR (neat) 1596, 1495, 1451, 1415, 700  $\text{cm}^{-1}$ ;  $^1\text{H}$  NMR (400 MHz,  $\text{CDCl}_3$ )  $\delta$  1.60 (s, 3 H), 1.62 (d,  $J = 1.2$  Hz, 3 H), 1.69 (s, 3 H), 1.97–2.03 (m, 4 H), 2.73 (t,  $J = 7.2$  Hz, 2 H), 3.90 (t,  $J = 8.0$  Hz, 1 H), 5.01 (t,  $J = 6.8$  Hz, 1 H), 5.05–5.14 (m, 1 H), 7.12–7.33 (m, 7 H), 8.48 (br d,  $J = 3.2$  Hz, 2 H);  $^{13}\text{C}$  NMR (75 MHz,  $\text{CDCl}_3$ )  $\delta$  17.7 (+), 23.4 (+), 25.8 (+), 26.4 (-), 32.1 (-), 33.3 (-), 51.2 (+), 122.3 (+), 123.5 (+) (br s), 124.2 (+), 126.7 (+), 128.0 (+), 128.6 (+), 131.8 (-), 137.3 (-), 143.1 (-), 149.8 (+), 153.8 (-); HRMS (FAB):  $m/z$  calcd for  $\text{C}_{22}\text{H}_{28}\text{N}$  [ $M+H^+$ ] 306.2222, found 306.2225.

### Propargylic Products

#### *tert*-Butyldimethyl((4-methyl-5,5-diphenylpent-2-yn-1-yl)oxy)silane (**39**)

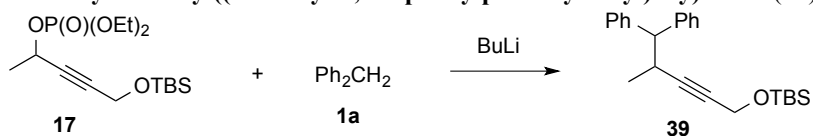

According to GP2 using phosphate **17** (31 mg, 0.087 mmol) in THF (0.5 mL), **1a** (52.5 mg, 0.312 mmol) and BuLi (1.60 M in hexane, 0.16 mL, 0.256 mmol) in THF (0.5 mL) at  $-15\text{ }^{\circ}\text{C}$  for 15 min afforded **39** (33 mg, 87% yield, >99% rs by  $^1\text{H}$  NMR):  $R_f$  0.87 (hexane/EtOAc 1:1); IR (neat) 1598, 1494, 1450, 1263, 1083  $\text{cm}^{-1}$ ;  $^1\text{H}$  NMR (400 MHz,  $\text{CDCl}_3$ )  $\delta$  0.01 (s, 6 H), 0.86 (s, 9 H), 1.15 (d,  $J = 6.8$  Hz, 3 H), 3.31 (dtq,  $J = 9.4, 2.0, 6.8$  Hz, 1 H), 3.85 (d,  $J = 9.4$  Hz, 1 H), 4.18 (d,  $J = 2.0$  Hz, 2 H), 7.14–7.37 (m, 10 H);  $^{13}\text{C}$  NMR (100 MHz,  $\text{CDCl}_3$ )  $\delta$  -5.1 (+), 18.3 (-), 20.4 (+), 25.9 (+), 30.6 (+), 52.0 (-), 57.5 (+), 81.0 (-), 88.2 (-), 126.4 (+), 126.5 (+), 128.2 (+), 128.5 (+), 128.6 (+), 143.1 (-), 143.2 (-); HRMS (FAB):  $m/z$  calcd for  $\text{C}_{24}\text{H}_{31}\text{OSi}$  [(M-H) $^+$ ] 363.2144, found 363.2138.

**(R)-Trimethyl(3-methyl-4,4-diphenylbut-1-yn-1-yl)silane ((R)-40)**

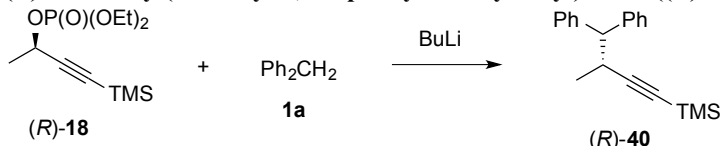

According to GP2 using phosphate (*R*)-**18** (98% ee, 39 mg, 0.141 mmol) in THF (1 mL), **1a** (75 mg, 0.446 mmol) and BuLi (1.60 M in hexane, 0.26 mL, 0.416 mmol) in THF (1 mL) at  $-15\text{ }^{\circ}\text{C}$  for 15 min afforded (*R*)-**40** (29 mg, 70% yield, >99% rs by  $^1\text{H}$  NMR): >98% ee as determined by HPLC analysis of the derived acid (see below);  $[\alpha]_D^{21} -4$  ( $c$  0.86,  $\text{CHCl}_3$ ); mp 47–48  $^{\circ}\text{C}$ ;  $R_f$  0.91 (hexane/EtOAc 1:1); IR (nujol) 1451, 1250, 842, 702  $\text{cm}^{-1}$ ;  $^1\text{H}$  NMR (300 MHz,  $\text{CDCl}_3$ )  $\delta$  0.00 (s, 9 H), 1.15 (t,  $J = 6.6$  Hz, 3 H), 3.27 (dq,  $J = 9.0, 6.6$  Hz, 1 H), 3.84 (d,  $J = 9.0$  Hz, 1 H), 7.11–7.38 (m, 10 H);  $^{13}\text{C}$  NMR (75 MHz,  $\text{CDCl}_3$ )  $\delta$  0.0 (+), 20.1 (+), 31.8 (+), 57.6 (+), 87.0 (-), 110.6 (-), 126.3 (+), 126.5 (+), 128.0 (+), 128.2 (+), 128.5 (+), 128.8 (+), 142.95 (-), 143.04 (-); HRMS (EI):  $m/z$  calcd for  $\text{C}_{20}\text{H}_{24}\text{Si}$  ( $\text{M}^+$ ) 292.1647, found 292.1647.

Determination of enantiomeric purity and the absolute configuration of (*R*)-**40**.

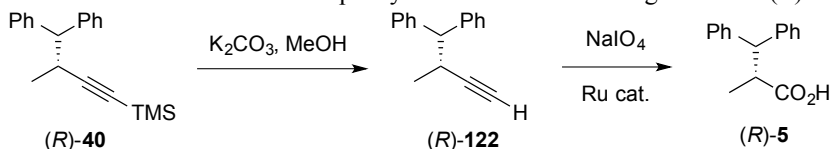

A mixture of the above product (*R*)-**40** (29 mg, 0.099 mmol) and  $\text{K}_2\text{CO}_3$  (20 mg, 0.145 mmol) in MeOH (5 mL) was stirred at rt for 2 h and diluted with  $\text{H}_2\text{O}$ . The resulting mixture was extracted with hexane twice. The combined extracts were dried over  $\text{MgSO}_4$  and concentrated to afford acetylene (*R*)-**122**, which was dissolved in  $\text{CCl}_4$  (1 mL), MeCN (1 mL) and  $\text{H}_2\text{O}$  (0.5 mL). To the solution were added  $\text{NaIO}_4$  (63 mg, 0.295 mmol) and  $\text{RuCl}_3 \cdot n\text{H}_2\text{O}$  (ca. 1 mg). The mixture was stirred at rt for 1 h and filtered through a pad of Celite. The filtrate was concentrated to leave an oil, which was purified by chromatography on silica gel to afford acid (*R*)-**5** (21 mg, 89% from (*R*)-**40**):  $R_f$  0.13 (hexane/EtOAc 4:1);  $^1\text{H}$  NMR (300 MHz,  $\text{CDCl}_3$ )  $\delta$  1.12 (d,  $J = 6.9$  Hz, 3 H), 3.31 (dq,  $J = 11.7, 6.6$  Hz, 1 H), 4.05 (d,  $J = 11.7$  Hz, 1 H), 7.10–7.33 (m, 10 H), ca. 8–11 (br s, 1 H);  $^{13}\text{C}$  NMR (75 MHz,  $\text{CDCl}_3$ )  $\delta$  17.2 (+), 44.3 (+), 54.7 (+), 126.6 (+), 126.7 (+), 127.6 (+), 128.2 (+), 128.6 (+), 128.8 (+), 142.1 (-), 142.9 (-), 181.6 (-). These  $^1\text{H}$  NMR and  $^{13}\text{C}$ -APT NMR spectra were consistent with the spectra (400 MHz and 100 MHz, respectively) of the same acid obtained from (*S*)-**4**. Comparison of specific rotations:  $[\alpha]_D^{22} +58$  ( $c$  0.42,  $\text{CHCl}_3$ ) for (*R*)-**5** from (*R*)-**40**;  $[\alpha]_D^{21} +57$  ( $c$  1.25,  $\text{CHCl}_3$ ) for (*R*)-**5** from (*S*)-**4** (vide supra);  $[\alpha]_D^{26.5} -52.6 \pm 1.7$  ( $c$  1.578,  $\text{CHCl}_3$ ) for the (*S*)-isomer in lit.,<sup>S12</sup> confirming the (*R*)-configuration of (*R*)-**5**. HPLC analysis of (*R*)-**5**: >98% ee (Chiralcel AS-H; hexane/*i*-PrOH = 99/1, 1 mL/min, 40  $^{\circ}\text{C}$ ):  $t_R$  (min) = 14.1 (minor (*S*)-isomer), 15.2 (major (*R*)-isomer)).

**(R)-(3-Benzhydryloct-1-yn-1-yl)trimethylsilane ((R)-41)**

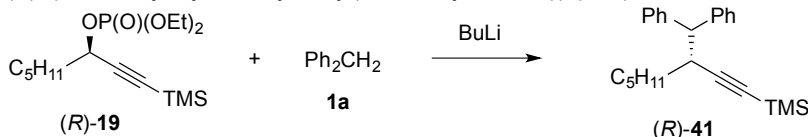

According to GP2 using phosphate (*R*)-**19** (93% ee, 46 mg, 0.138 mmol) in THF (1 mL), **1a** (74 mg, 0.44 mmol) and BuLi (1.60 M in hexane, 0.26 mL, 0.416 mmol) in THF (1 mL) at  $-15\text{ }^{\circ}\text{C}$  for 15 min afforded (*R*)-**41** (37 mg, 77% yield, >99% rs by  $^1\text{H}$  NMR): 92% ee as determined by HPLC analysis (Chiralcel OD-H, hexane/*i*-PrOH = 99.9/0.1, 0.5 mL/min, 35  $^{\circ}\text{C}$ ,  $t_R$  (min) = 11.8 (minor (*S*)-isomer), 12.1 (major (*R*)-isomer));  $[\alpha]_D^{21} +16$  ( $c$  0.71,  $\text{CHCl}_3$ );  $R_f$  0.73 (hexane/EtOAc 3:1); IR (neat) 2169, 1496, 1451, 1249, 842, 700  $\text{cm}^{-1}$ ;  $^1\text{H}$  NMR (400 MHz,  $\text{CDCl}_3$ )  $\delta$  0.01 (s, 9 H), 0.85 (t,  $J = 7.2$  Hz, 3 H), 1.12–1.31 (m, 4 H), 1.31–1.47 (m, 3 H), 1.48–1.63 (m, 1 H),

3.16 (ddd,  $J = 8.6, 8.6, 4.0$  Hz, 1 H), 3.91 (d,  $J = 8.6$  Hz, 1 H), 7.13–7.20 (m, 2 H), 7.21–7.38 (m, 8 H);  $^{13}\text{C}$  NMR (100 MHz,  $\text{CDCl}_3$ )  $\delta$  0.0 (+), 14.1 (+), 22.6 (–), 27.0 (–), 31.6 (–), 33.3 (–), 37.8 (+), 55.9 (+), 88.2 (–), 109.4 (–), 126.3 (+), 126.4 (+), 128.0 (+), 128.3 (+), 128.5 (+), 129.0 (+), 143.1 (–), 143.2 (–); HRMS (EI):  $m/z$  calcd for  $\text{C}_{24}\text{H}_{32}\text{Si}$  ( $\text{M}^+$ ) 348.2273, found 348.2274.

**(3-(9H-Xanthen-9-yl)oct-1-yn-1-yl)trimethylsilane (42)**

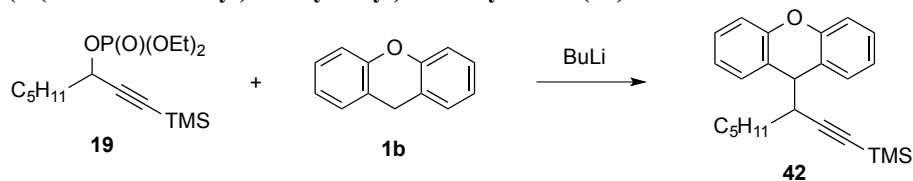

According to GP2 using phosphate **19** (47 mg, 0.141 mmol) in THF (1 mL), xanthene (**1b**) (82 mg, 0.45 mmol) and BuLi (1.60 M in hexane, 0.26 mL, 0.416 mmol) in THF (1 mL) at  $-15$  °C for 15 min afforded **42** (44 mg, 87% yield, >99% rs by  $^1\text{H}$  NMR):  $R_f$  0.83 (hexane/EtOAc 2:1); IR (neat) 2169, 1479, 1458, 1255, 842, 754  $\text{cm}^{-1}$ ;  $^1\text{H}$  NMR (400 MHz,  $\text{CDCl}_3$ )  $\delta$  0.14 (s, 9 H), 0.80 (t,  $J = 6.8$  Hz, 3 H), 1.04–1.30 (m, 7 H), 1.38–1.48 (m, 1 H), 2.57–2.68 (m, 1 H), 4.15 (d,  $J = 3.6$  Hz, 1 H), 7.02–7.11 (m, 4 H), 7.20–7.28 (m, 3 H), 7.44 (d,  $J = 7.6$  Hz, 1 H);  $^{13}\text{C}$  NMR (100 MHz,  $\text{CDCl}_3$ )  $\delta$  0.0 (+), 14.1 (+), 22.6 (–), 27.2 (–), 29.7 (–), 31.5 (–), 43.0 (+), 43.3 (+), 88.0 (–), 108.4 (–), 116.1 (+), 116.3 (+), 122.5 (–), 122.7 (+), 123.0 (+), 123.2 (–), 128.0 (+), 129.2 (+), 129.8 (+), 152.9 (–), 153.0 (–); HRMS (EI):  $m/z$  calcd for  $\text{C}_{24}\text{H}_{30}\text{OSi}$  ( $\text{M}^+$ ) 362.2066, found 362.2060.



## Part 2: References

- S1 W. Kinouchi, R. Saeki, H. Kawashima and Y. Kobayashi, *Tetrahedron Lett.*, 2015, **56**, 2265.
- S2: Y. Kitano, T. Matsumoto and F. Sato, *Tetrahedron*, 1988, **44**, 4073.
- S3: M. Ito, M. Matsuomi, M. G. Murugesu and Y. Kobayashi, *J. Org. Chem.*, 2001, **66**, 5881.
- S4: Q. Wang and Y. Kobayashi, *Y. Org. Lett.*, 2011, **13**, 6252.
- S5: A. K. Ghosh, B. D. Chapsal, A. Baldrige, K. Ide, Y. Koh and H. Mitsuya, *Org. Lett.*, 2008, **10**, 5135.
- S6: J. Dhineshkumar and K.R. Prabhu, *Org. Lett.*, 2013, **15**, 6062.
- S7: S. Murahashi, Y. Taniguchi, Y. Imada and Y. Tanigawa, *J. Org. Chem.*, 1989, **54**, 3292.
- S8: S. Nowotny, C. E. Tucker, C. Jubert and P. Knochel, *J. Org. Chem.*, 1995, **60**, 2762.
- S9: F. Gao, K. P. McGrath, Y. Lee and A. H. Hoveyda, *J. Am. Chem. Soc.*, 2010, **132**, 14315.
- S10: H. Ohmiya, U. Yokobori, Y. Makida and M. Sawamura, *J. Am. Chem. Soc.*, 2010, **132**, 2895.
- S11: K. Matsumura, S. Hashiguchi, T. Ikariya and R. Noyori, *J. Am. Chem. Soc.*, 1997, **119**, 8738.
- S12: H. M. Walborsky and C. G. Pitt, *J. Am. Chem. Soc.*, 1962, **84**, 4831.
- S13: M. T. Reetz, P. Walz, F. Hübner, S. H. Hüttenhain, H. Heimbach and K. Schwellnus, *Chem. Ber.*, 1984, **117**, 322.
- S14: S.-C. Sha, J. Zhang, P. J. Carroll and P. J. Walsh, *J. Am. Chem. Soc.*, 2013, **135**, 17602.
- S15: M. Yasuda, T. Saito, M. Ueba and A. Baba, *Angew. Chem. Int. Ed.*, 2004, **43**, 1414.
- S16: A. Ogata, M. Nemoto, K. Kobayashi, A. Tsubouchi and T. Takeda, *J. Org. Chem.*, 2007, **72**, 3816.
- S17: J. Zhang, C. Stanciu, B. Wang, M. M. Hussain, C.-S. Da, P. J. Carroll, S. D. Dreher and P. J. Walsh, *J. Am. Chem. Soc.*, 2011, **133**, 20552.

**Part 3: D-Incorporation Experiments of Ph<sub>2</sub>CH<sub>2</sub> (1a) (Table S1)**

**Table S1. D-Incorporation Experiments of Reactant 1a<sup>a</sup>**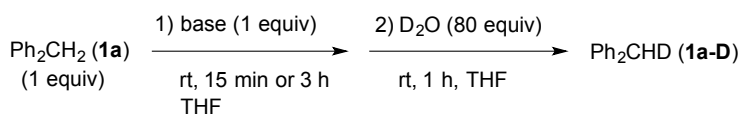

| entry | base (equiv) | reaction time | D-incorporation (%) <sup>b</sup> |
|-------|--------------|---------------|----------------------------------|
| S1    | BuLi (1)     | 15 min        | 70.2                             |
| S2    | BuLi (1)     | 3 h           | 71.7                             |
| S3    | BuLi (3)     | 15 min        | 84.2                             |
| S4    | LDA (1)      | 15 min        | 72.5                             |
| S5    | LDA (1)      | 3 h           | 71.9                             |
| S6    | LiHMDS (1)   | 15 min        | 0%                               |
| S7    | LiHMDS (1)   | 3 h           | 0%                               |
| S8    | NaHMDS (1)   | 15 min        | 0%                               |
| S9    | NaHMDS (1)   | 3 h           | 0%                               |
| S10   | KHMDS (1)    | 15 min        | 0%                               |
| S11   | KHMDS (1)    | 3 h           | 0%                               |
| S12   | NaH (1)      | 15 min        | 0%                               |

<sup>a</sup>Reactant **1a** was exposed to given bases in THF at rt for 15 min or 3 h and excess D<sub>2</sub>O was added to the solution (see below for further details). <sup>b</sup>Calculated as described in the next page.

An Entry using BuLi (Table S1, entry S2): To a solution **1a** (35 mg, 0.208 mmol) in THF (0.5 mL) was added BuLi (1.60 M in hexane, 0.13 mL, 0.208 mmol) at rt. The resulting dark red solution was stirred at rt for 3 h, and D<sub>2</sub>O (0.30 mL from a freshly opened ampule, 99.96% D, 16.6 mmol, 80 equiv) was added to the solution, which turned to colorless immediately. After 1 h of stirring at rt, the product was extracted with EtOAc. The extract was dried over MgSO<sub>4</sub> and concentrated to afford **1a-D** (34 mg, 97% yield). D-incorporation was 71.7% by <sup>1</sup>H NMR spectroscopy.

Other Entries using given Bases: D-incorporation was carried out at rt for 15 min or 3 h according to the method mentioned above using a base (1 equiv). In entry S3, three equiv of BuLi was used to generate the anion **1a**/BuLi.

Table S1, entry S2

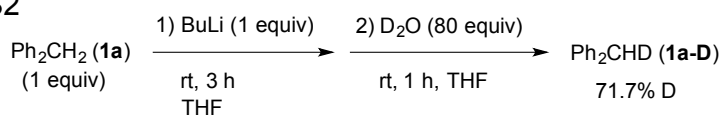

$^1\text{H}$  NMR (400 MHz,  $\text{CDCl}_3$ )

Total four protons for a mixture of **1a** and **1a-D**

(1) Integration was set as 4.0

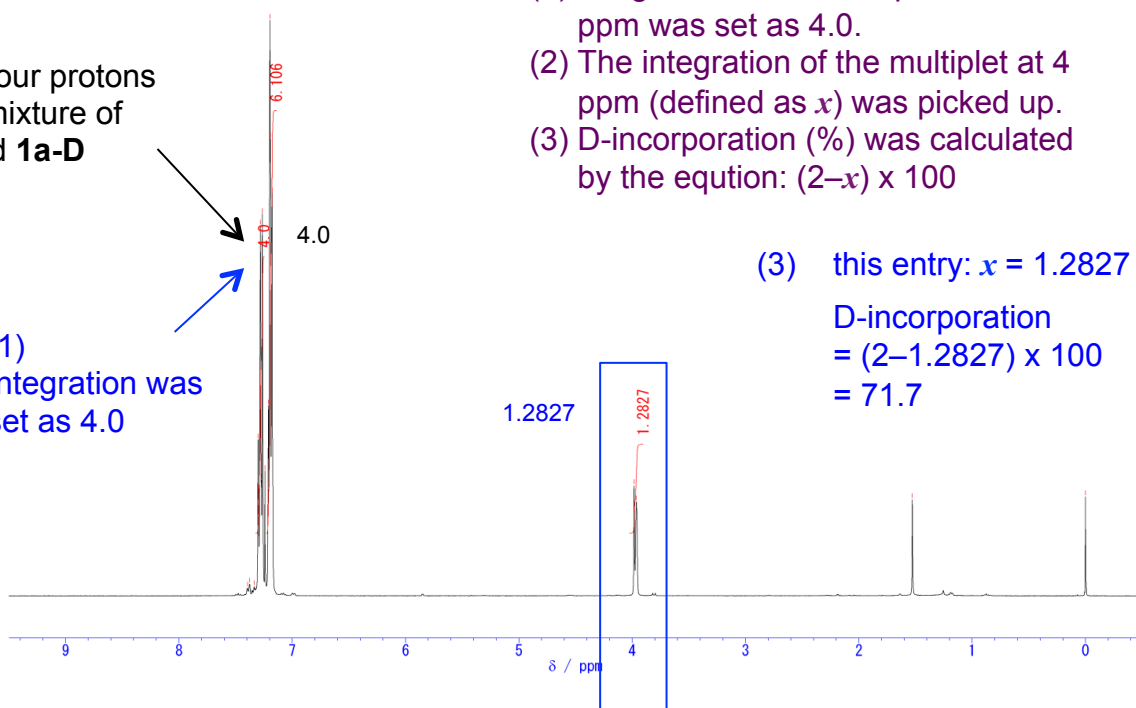

### Calculation of D-incorporation (%)

- (1) Integration of the multiplet at 7.3 ppm was set as 4.0.
- (2) The integration of the multiplet at 4 ppm (defined as  $x$ ) was picked up.
- (3) D-incorporation (%) was calculated by the equation:  $(2-x) \times 100$

(3) this entry:  $x = 1.2827$

$$\begin{aligned} \text{D-incorporation} &= (2 - 1.2827) \times 100 \\ &= 71.7 \end{aligned}$$

Two (2) protons of **1a**

One (1) proton of **1a-D**

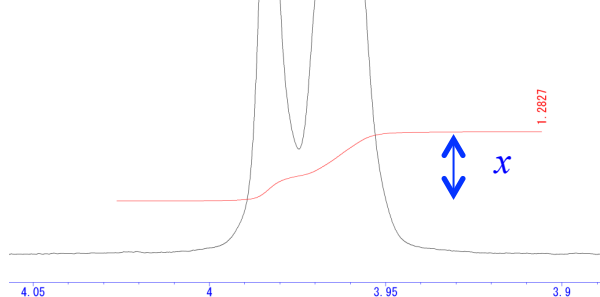

(2) Integration  $x = 1.2827$

<sup>1</sup>H NMR (400 MHz, CDCl<sub>3</sub>)

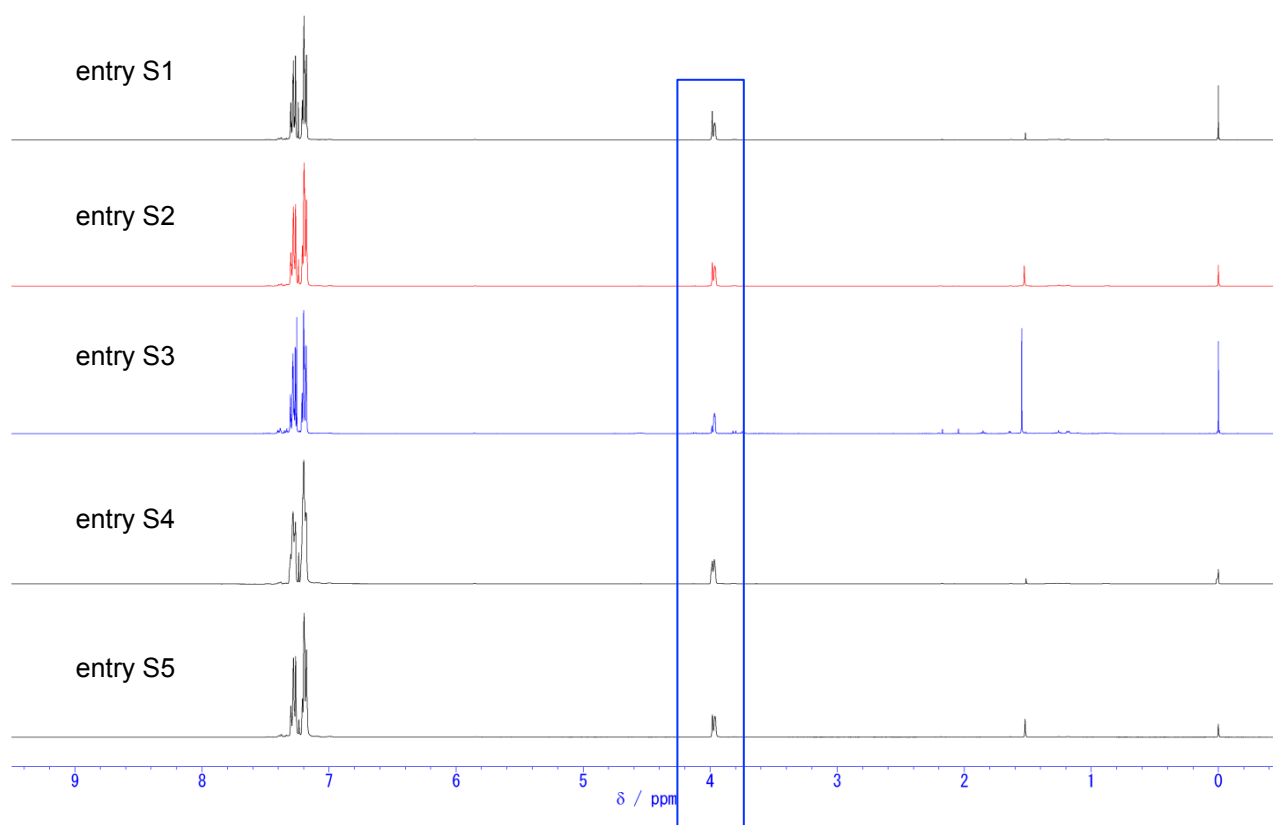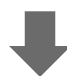

entry S1, BuLi (1 equiv), 15 min

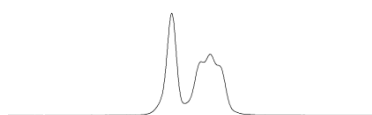

70.2% D

entry S2, BuLi (1 equiv), 3 h

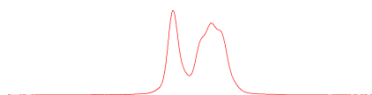

71.7% D

entry S3, BuLi (3 equiv), 15 min

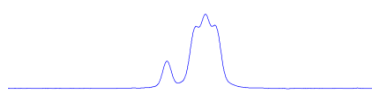

84.2% D

entry S4, LDA (1 equiv), 15 min

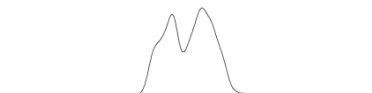

72.5% D

entry S5, LDA (1 equiv), 3 h

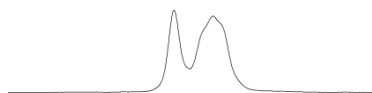

71.9% D

S21

continued to the next page

<sup>1</sup>H NMR (400 MHz, CDCl<sub>3</sub>)

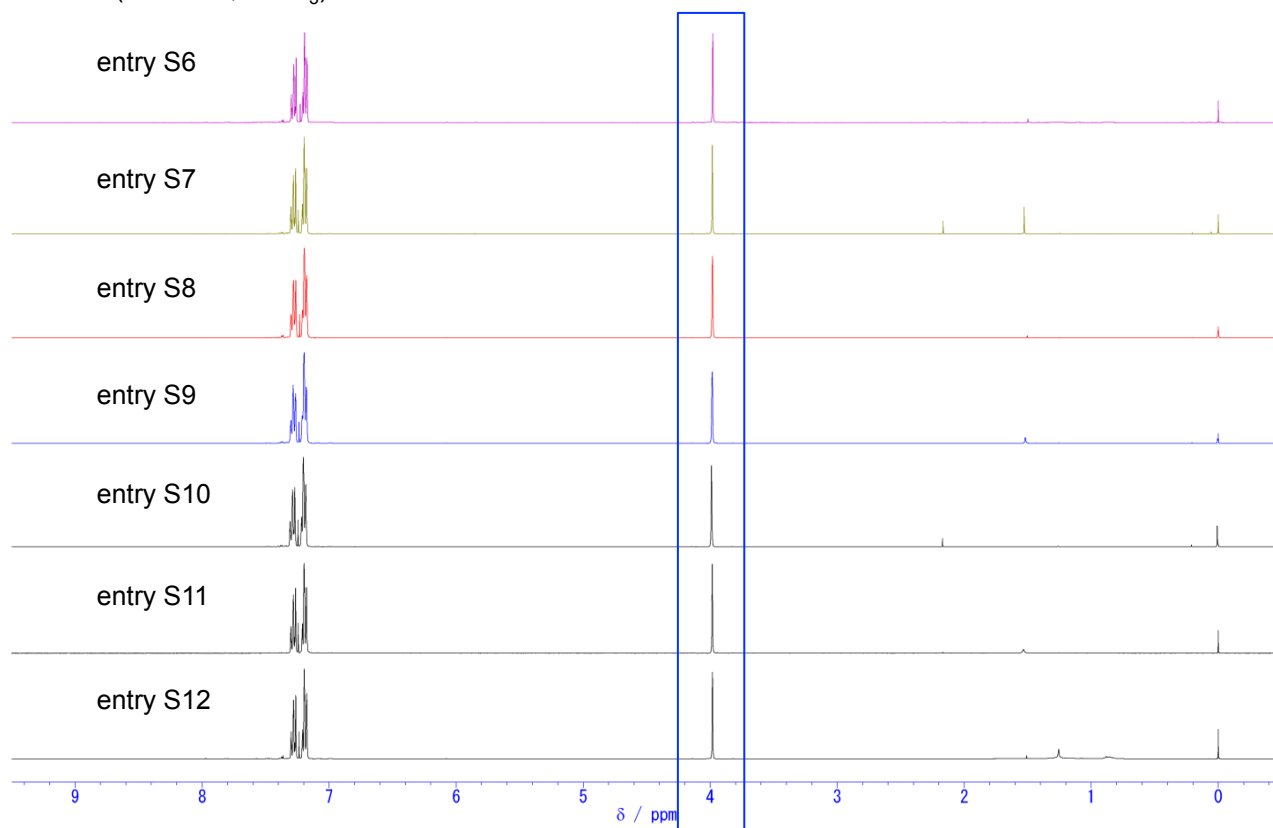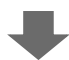

entry S6, LiHMDS (1 equiv), 15 min

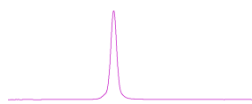

0% D

entry S7, LiHMDS (1 equiv), 3 h

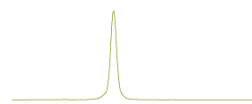

0% D

entry S8, NaHMDS (1 equiv), 15 min

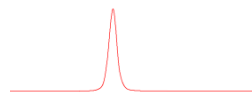

0% D

entry S9, NaHMDS (1 equiv), 3 h

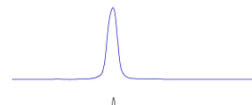

0% D

entry S10, KHMDS (1 equiv), 15 min

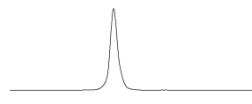

0% D

entry S11, KHMDS (1 equiv), 3 h

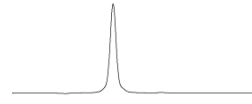

0% D

entry S12, NaH (1 equiv), 15 min

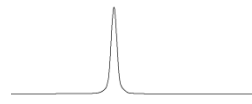

0% D

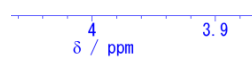

S22

## **Part 4: Determination of Enantiomeric, Diastereomeric, Regioisomeric Ratios**

Determination of the enantiomeric purity of (*R*)-117 by <sup>1</sup>H NMR  
 (This alcohol (*R*)-117 was used for the synthesis of (*R*)-2, (*R*)-3, and (*R*)-18)

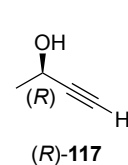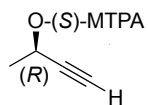

(*S*)-MTPA ester of (*R*)-117  
<sup>1</sup>H NMR (400 MHz, CDCl<sub>3</sub>)

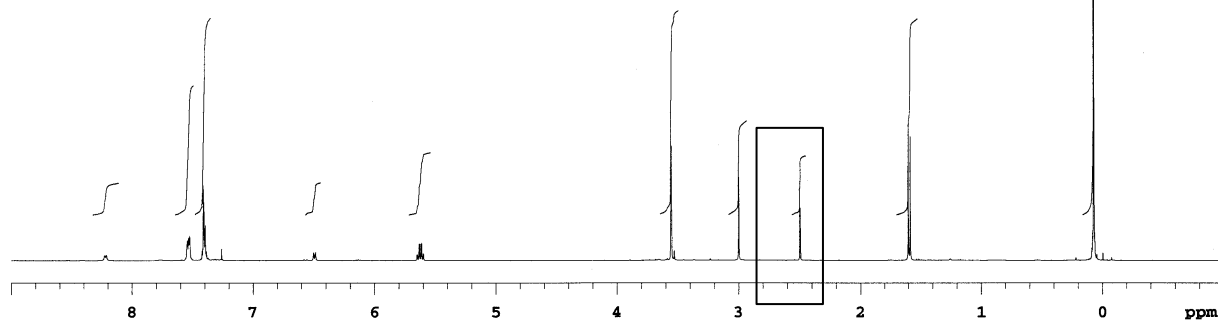

expansion

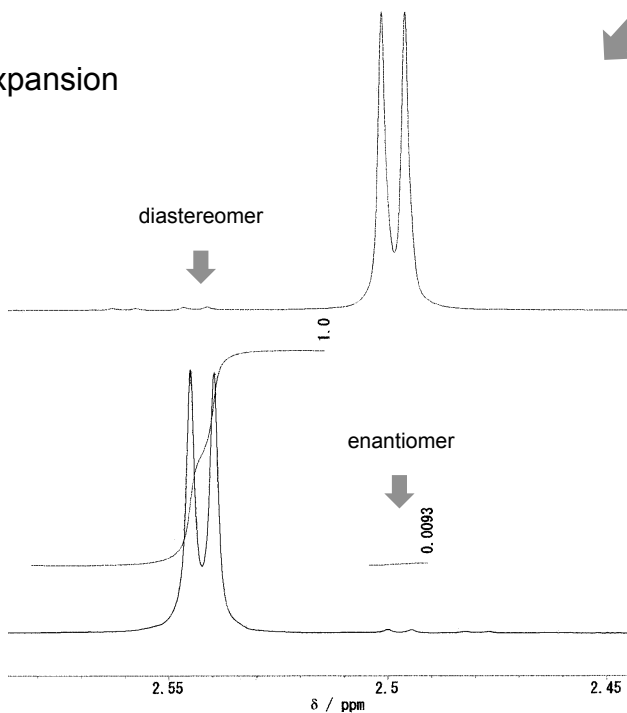

major : minor = 1.0 : 0.0093

$$ee = (1.0 - 0.0093) \times 100 / (1.0 + 0.0093) = 98.2\%$$

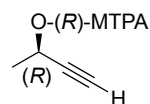

(*R*)-MTPA ester of (*R*)-117  
<sup>1</sup>H NMR (400 MHz, CDCl<sub>3</sub>)

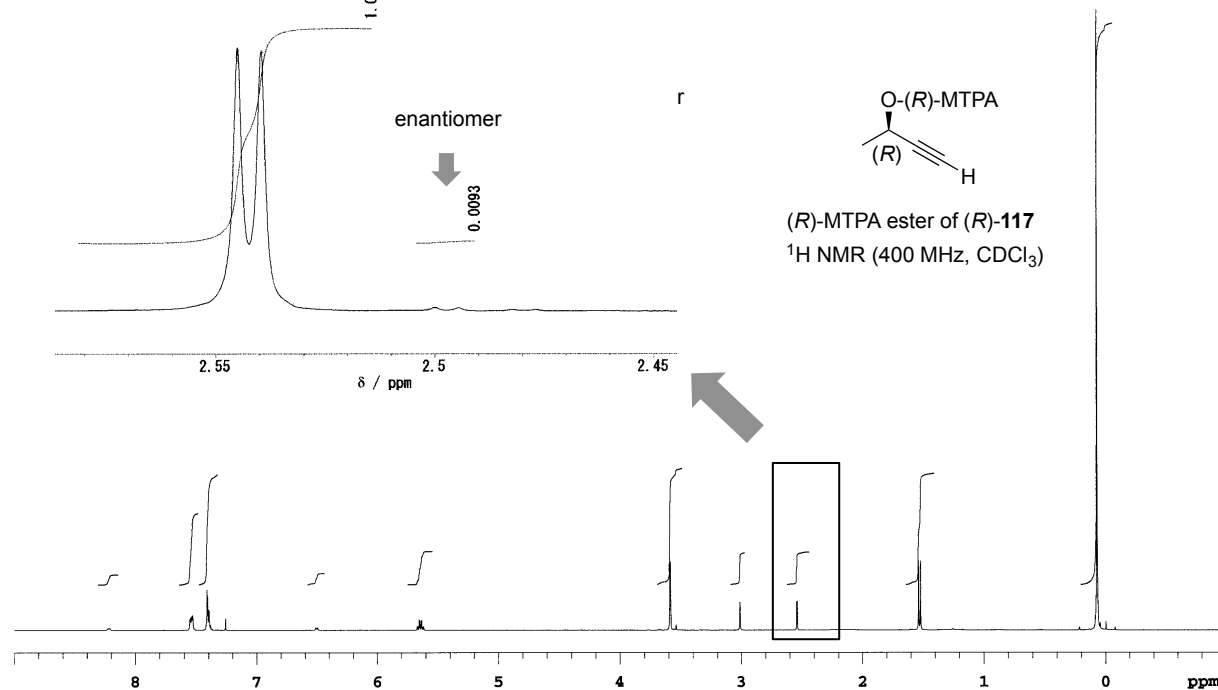



Determination of the enantiomeric purity of (*R*)-**105** by <sup>1</sup>H NMR (400 MHz, CDCl<sub>3</sub>)

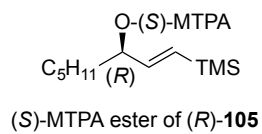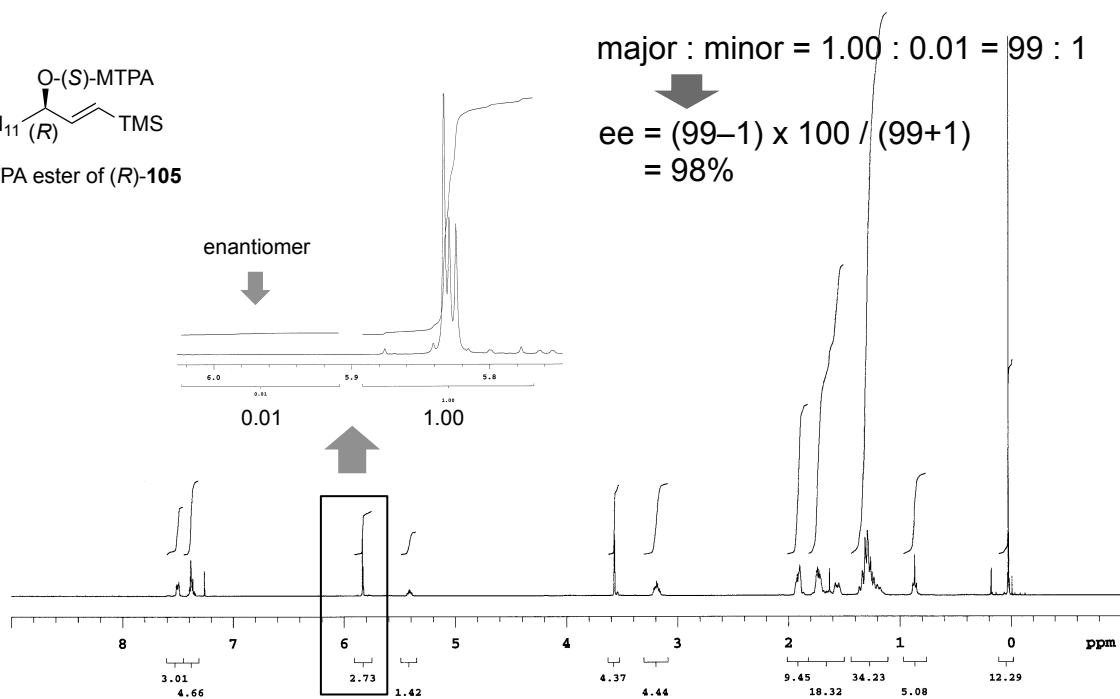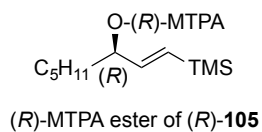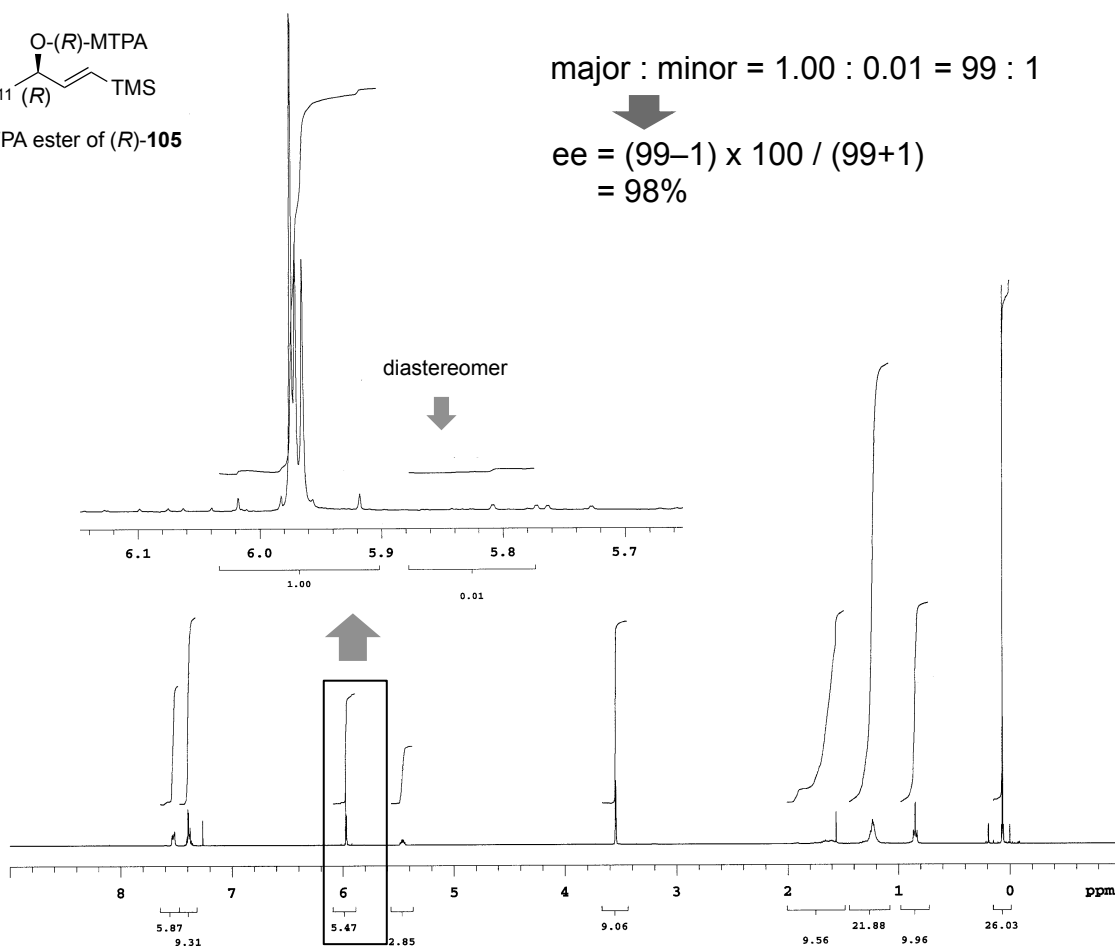

Determination of the olefinic purity of **15** and **16**, respectively, by  $^{13}\text{C}$  NMR (75 MHz,  $\text{CDCl}_3$ )  
 (The full spectra of **15** and **16** are attached to part 5 of the supporting info.)

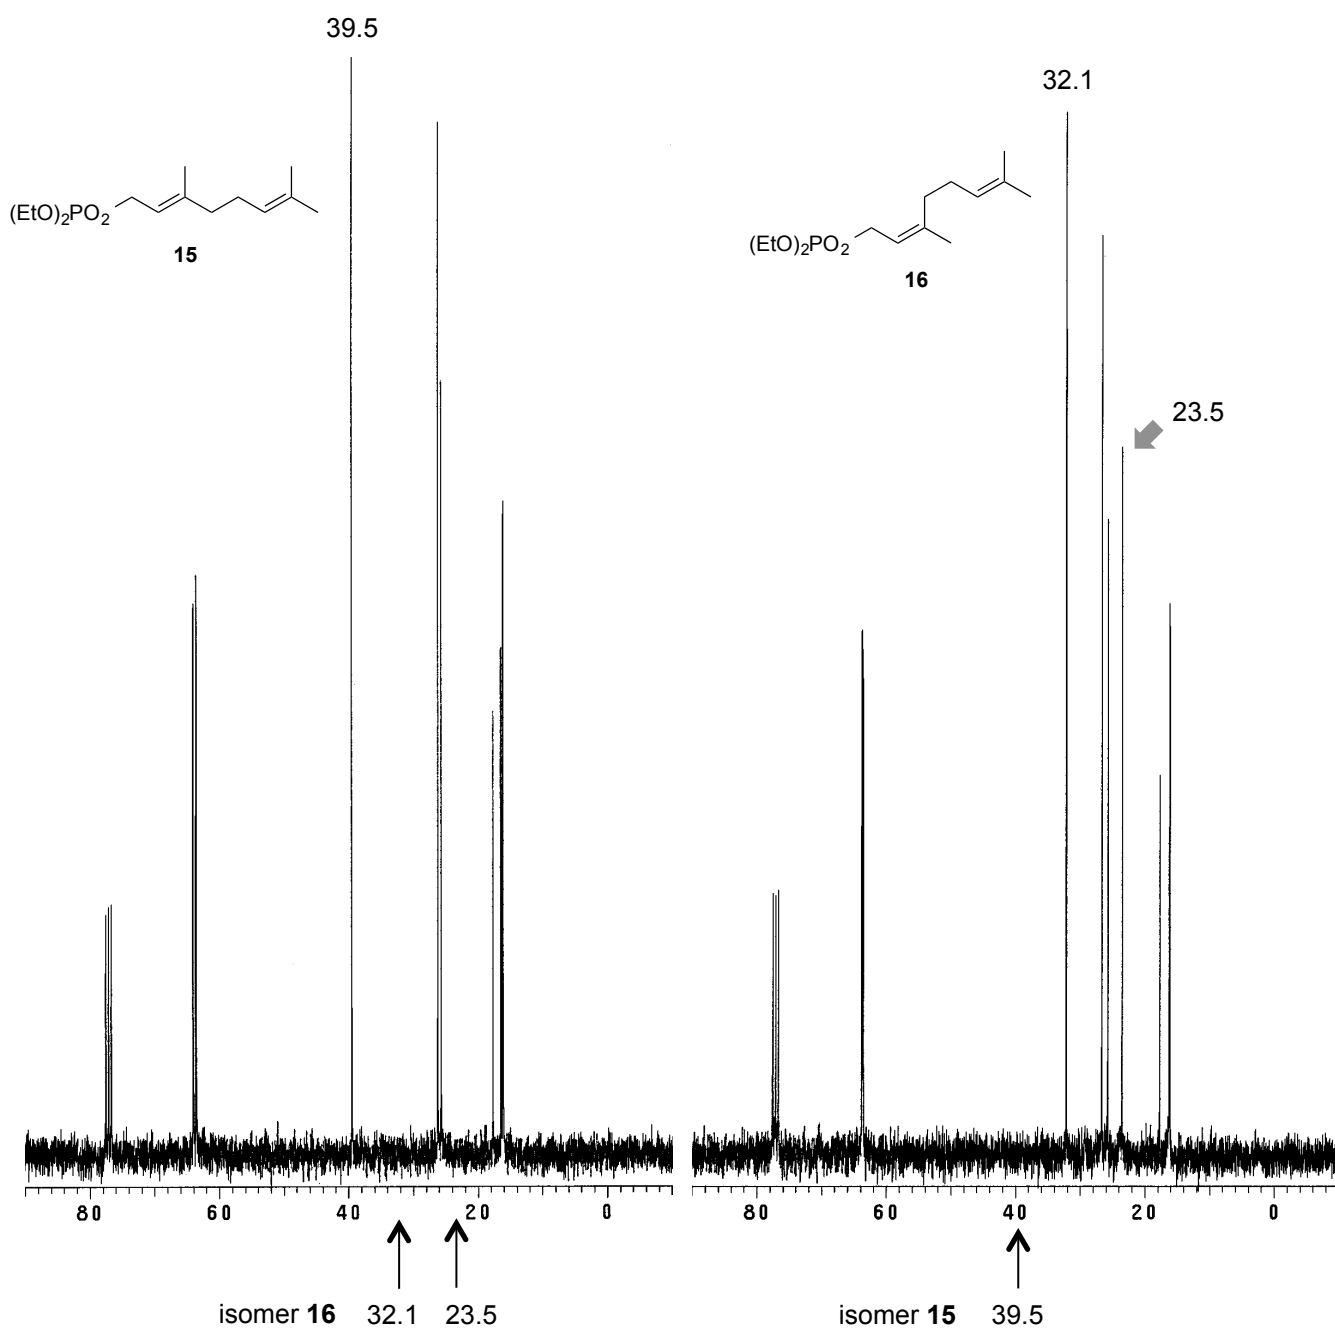

**15** : **16** by height ratio of  
 signal (39.5 ppm) and noise  
 = 17.3 : 0.4 (cm)  
 = 97.7 : 2.3 = >97 : 3

**16** : **15** by height ratio of  
 signal (39.5 ppm) and noise  
 = 16.3 : 0.4 (cm)  
 = 97.6 : 2.4 = >97 : 3

Determination of the enantiomeric purity of (*R*)-119 ratio calculated using two sets of the signals by <sup>1</sup>H NMR (400 MHz, CDCl<sub>3</sub>)

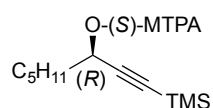

(*S*)-MTPA ester of (*R*)-119  
<sup>1</sup>H NMR (400 MHz, CDCl<sub>3</sub>)

$$(R) : (S) = 0.93 : 0.03 = 96.9 : 3.1$$

$$ee = (0.93 - 0.03) \times 100 / (0.93 + 0.03) = 93\%$$

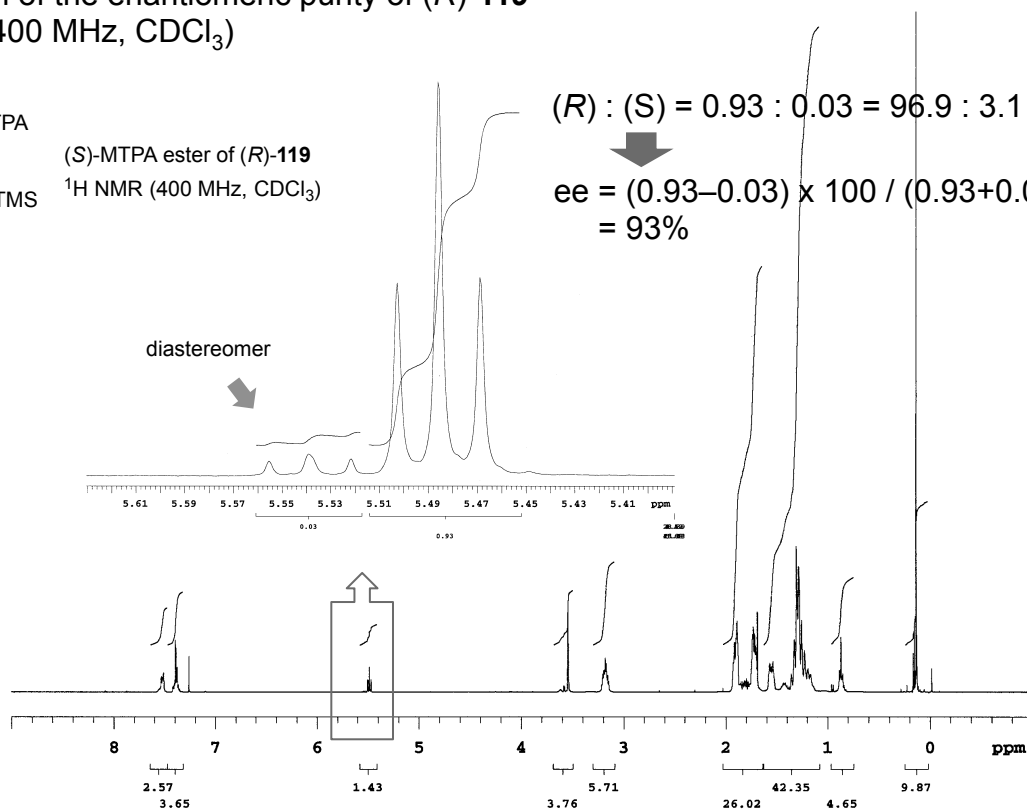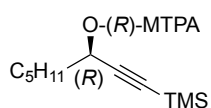

(*R*)-MTPA ester of (*R*)-119  
<sup>1</sup>H NMR (400 MHz, CDCl<sub>3</sub>)

$$(R) : (S) = 1.13 : 0.04 = 96.6 : 3.4$$

$$ee = (1.13 - 0.04) \times 100 / (1.13 + 0.04) = 93\%$$

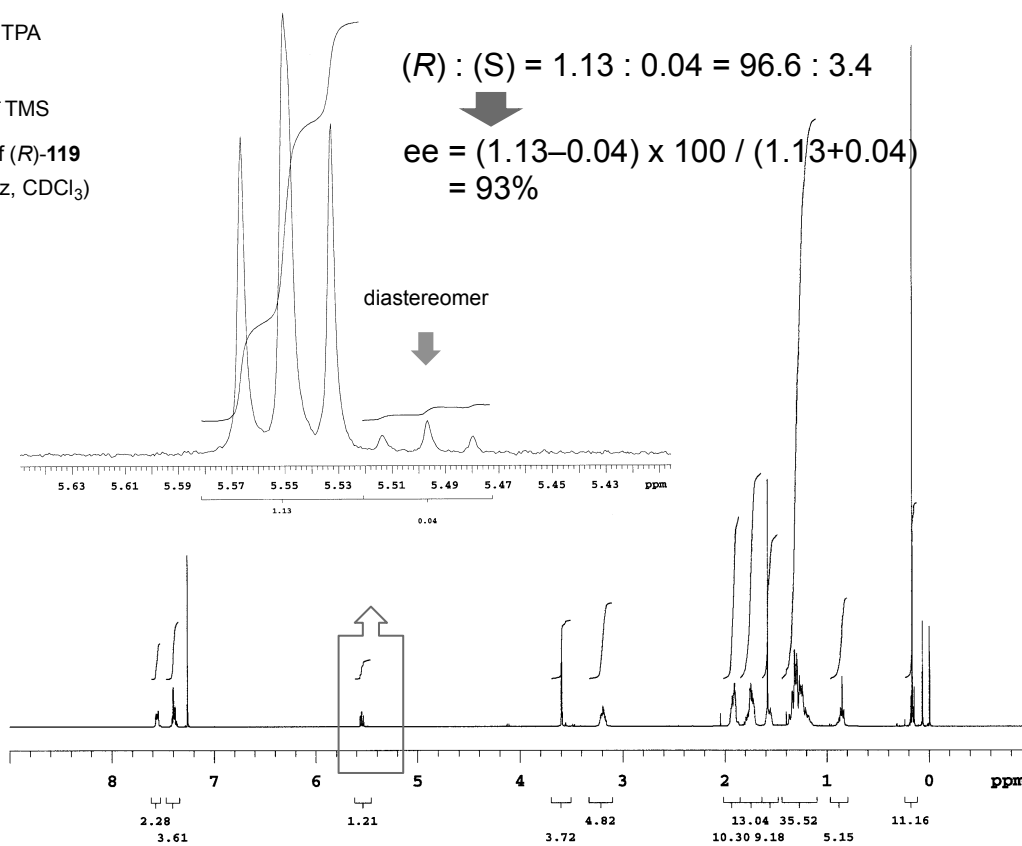

Determination of the enantiomeric purity of the products obtained by Scheme 1 in the text and eqns S1–S3 below by chiral HPLC

conditions: Chiralcel AS-H, hexane/*i*-PrOH = 99/1, 0.5 mL/min, 33 °C

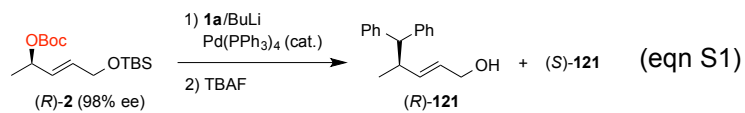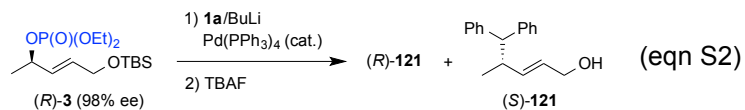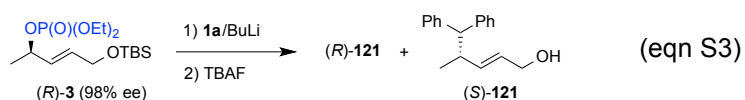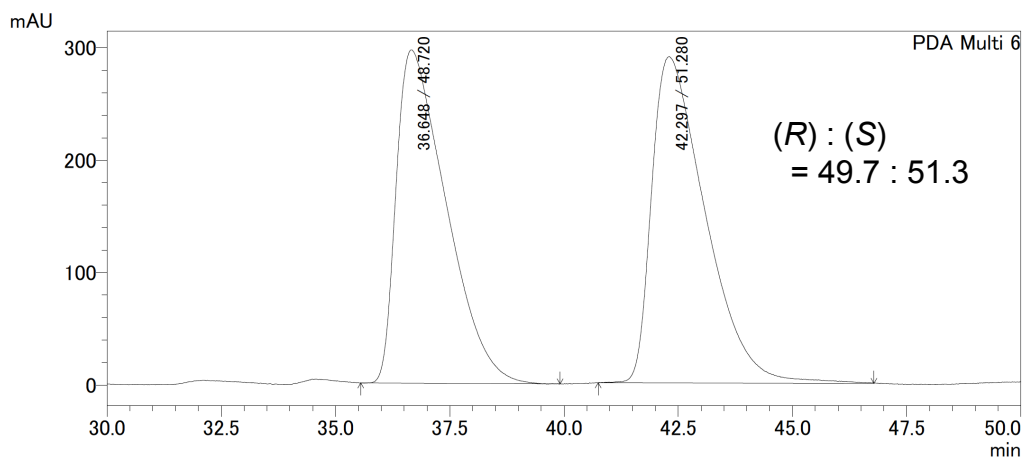

Figure S1. Racemic alcohol **121**

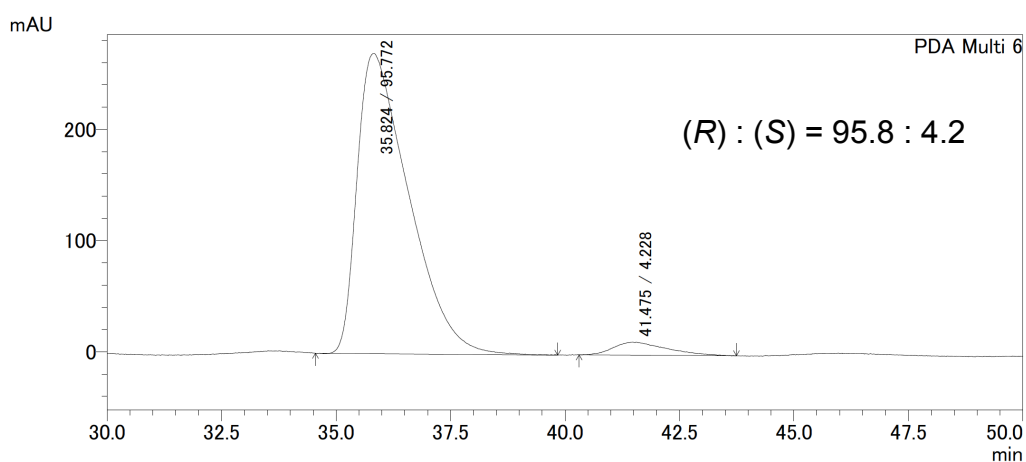

Figure S2. The product of eq S1

continued to the next page

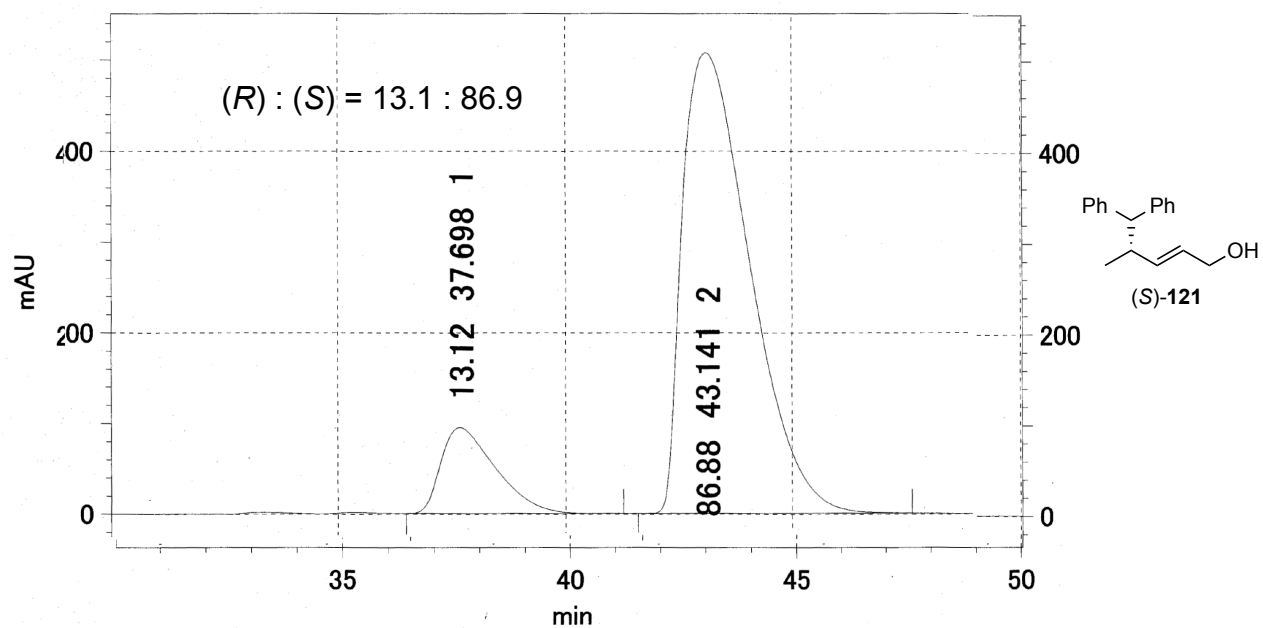

Figure S3. The product of eq S2

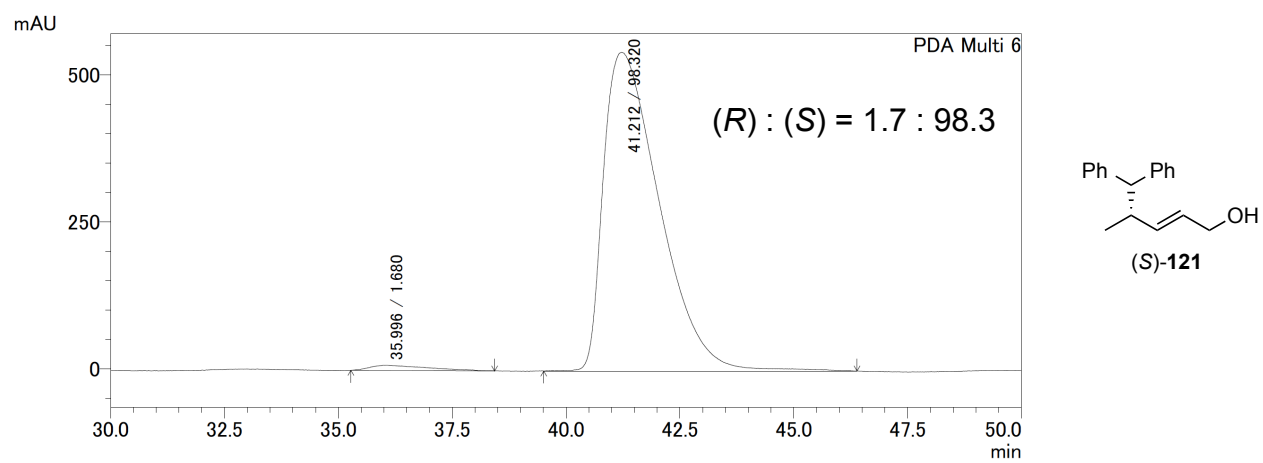

Figure S4. The product of eq S3

Determination of the ratio of (S)-4 and the regioisomer by  $^1\text{H}$  NMR (400 MHz,  $\text{CDCl}_3$ )  
 (The full spectrum of (S)-4 is attached to part 5 of this ESI)

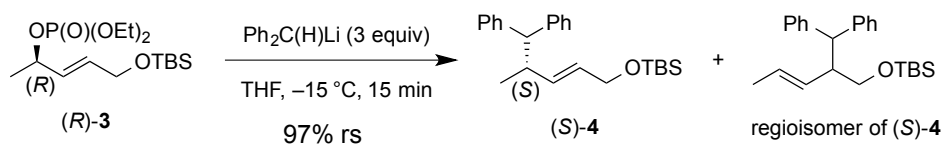

$$\text{(S)-4 : regioisomer} = 2.0/2 : (0.0291 + 0.0296/2) = 97 : 3$$

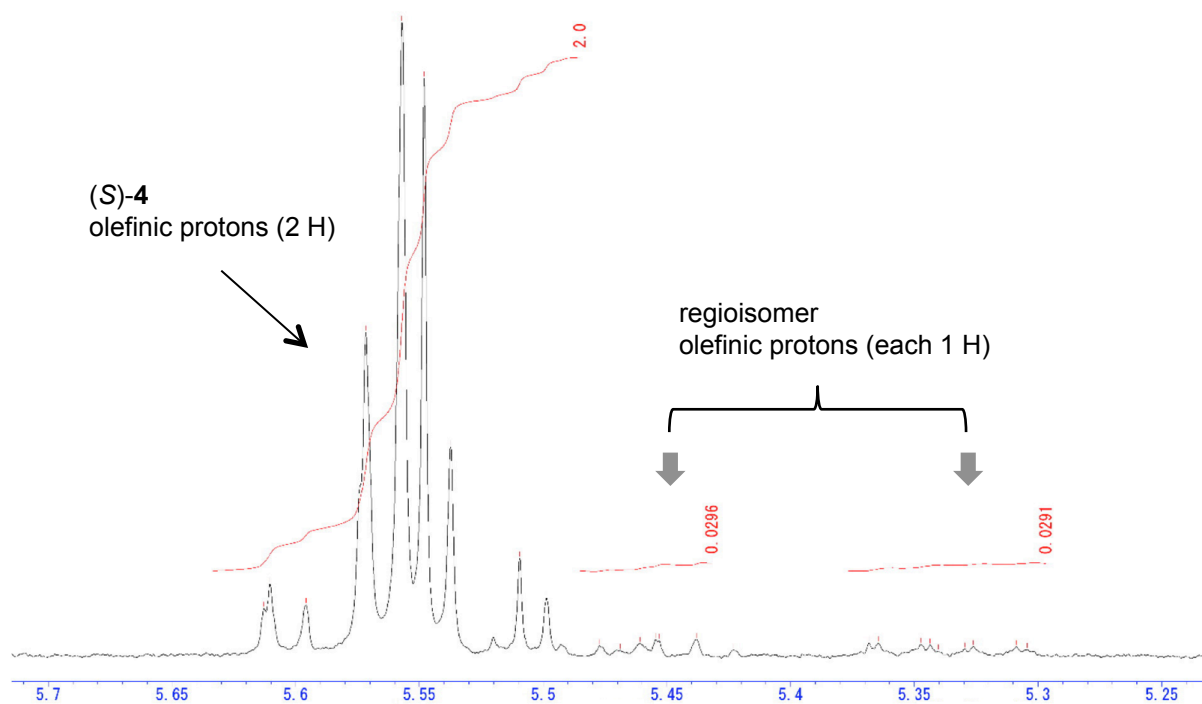

Determination of the ratio of (*R*)-**4** and the regioisomer by <sup>1</sup>H NMR (400 MHz, CDCl<sub>3</sub>)  
(The full spectrum of (*R*)-**4** is attached to part 5 of this ESI)

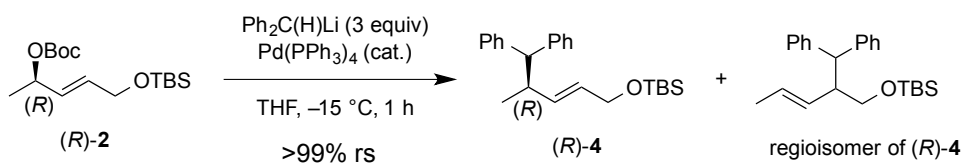

(*R*)-**4** : regioisomer = >99 : 1

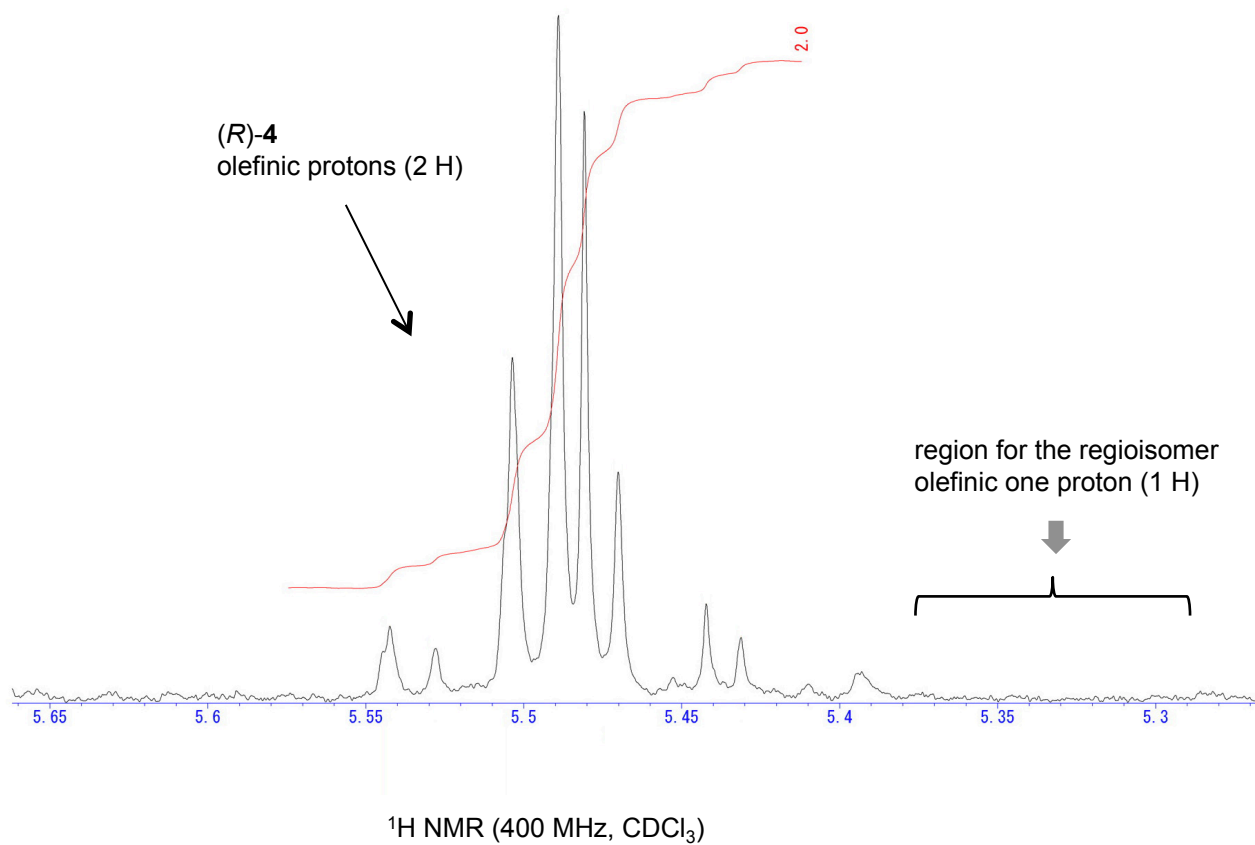

Determination of the ratio of **20** and the regioisomer by  $^1\text{H}$  NMR (400 MHz,  $\text{CDCl}_3$ )  
 (The full spectrum of **20** is attached to part 5 of this ESI)

ratio calculated using two sets of the signals

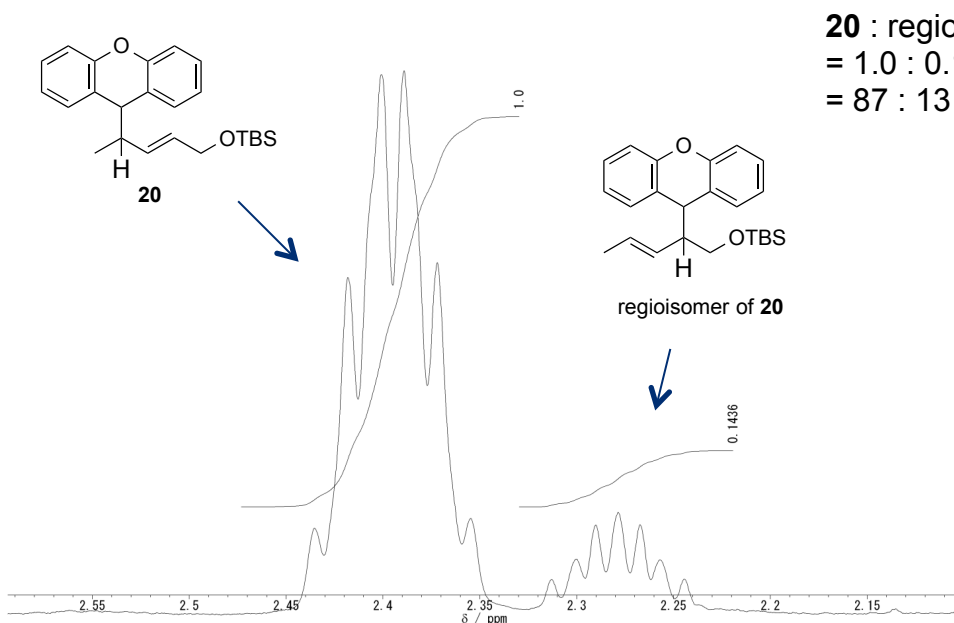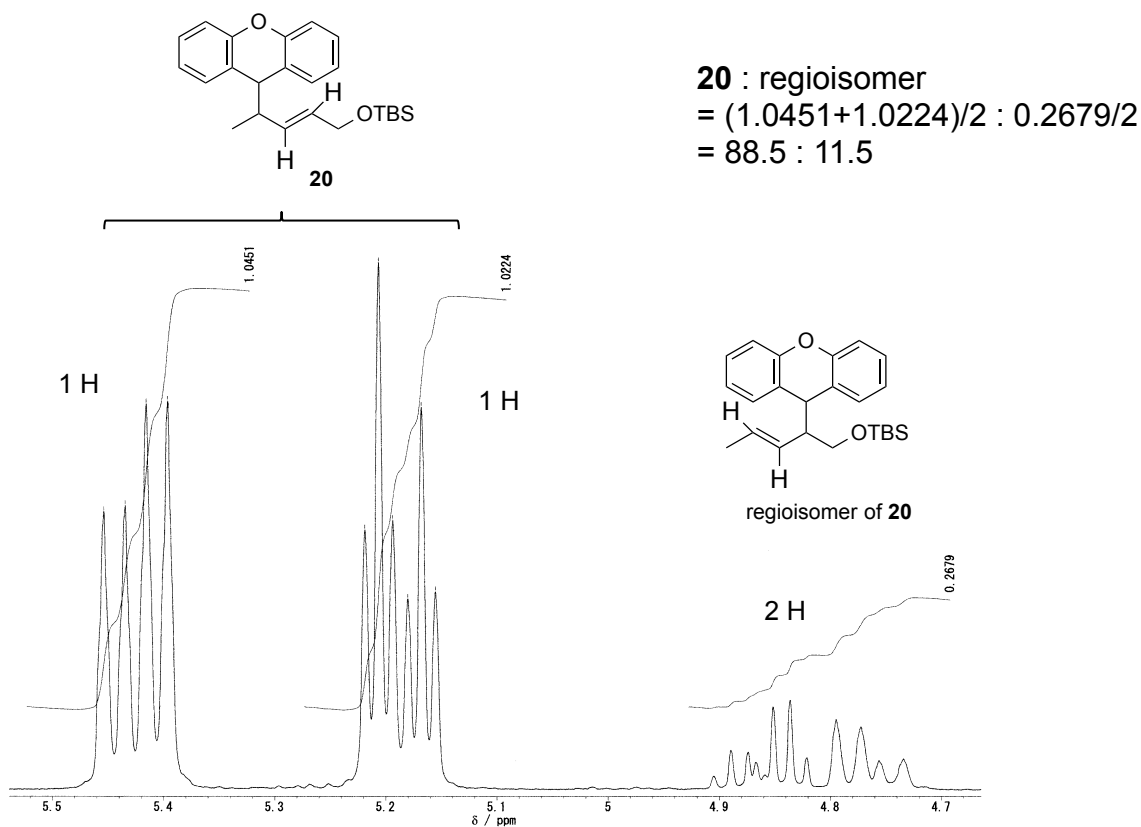



Determination of the ratio of **21** and the regioisomer by  $^1\text{H}$  NMR (400 MHz,  $\text{CDCl}_3$ )  
(The full spectrum of **21** is attached to part 5 of this ESI)

ratio calculated using two sets of the signals

**21** : regioisomer  
= 1.003 : 0.1754  
= 85 : 15

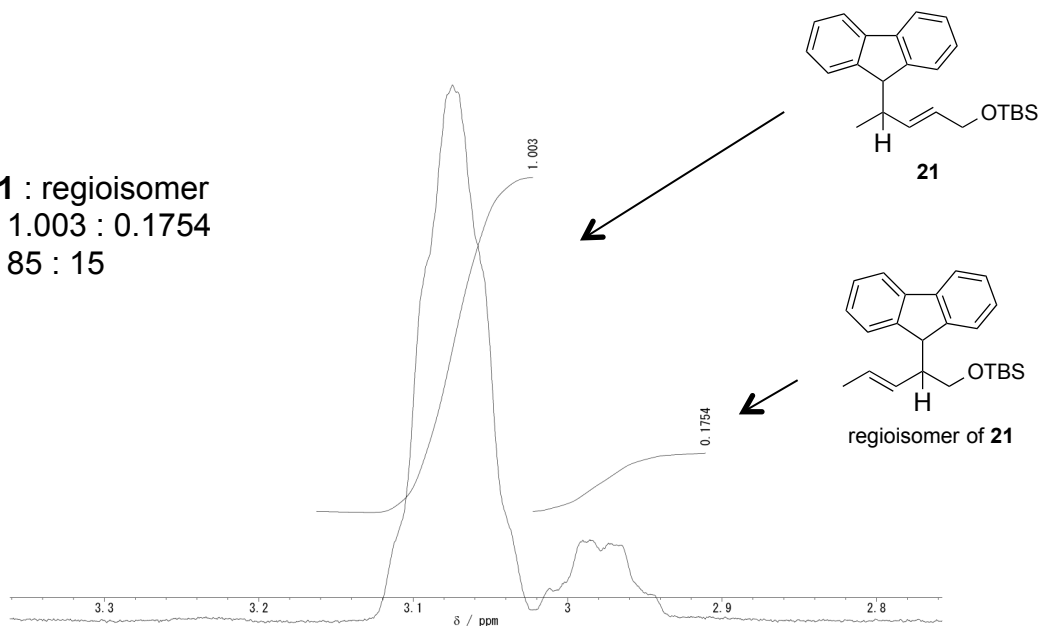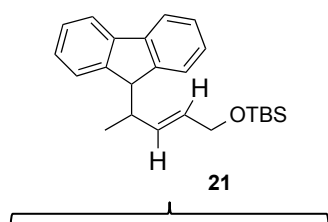

**21** : regioisomer  
=  $(1.014+1.0)/2$  :  $(0.1696+0.1709)/2$   
= 86 : 14

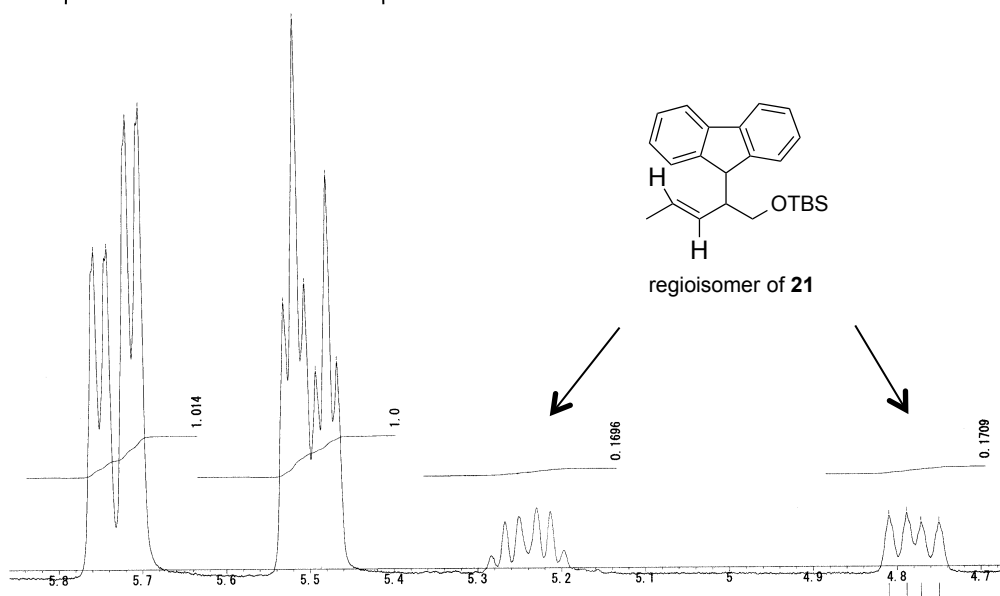

Determination of the ratio of **22** and the regioisomer by  $^1\text{H}$  NMR (400 MHz,  $\text{CDCl}_3$ )  
(The full spectrum of **22** is attached to part 5 of this ESI)

**22** : regioisomer  
= 1.0 : 0.0845  
= 92 : 8

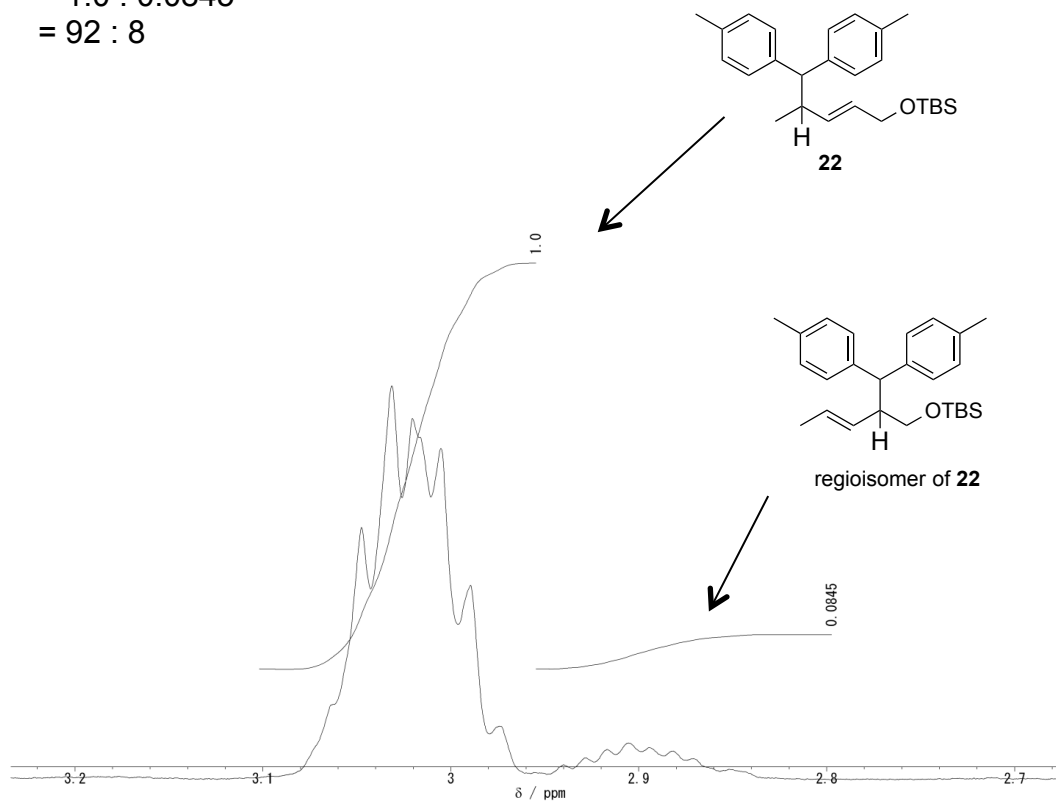

Determination of the ratio of **23** and the regioisomer by  $^1\text{H}$  NMR (400 MHz,  $\text{CDCl}_3$ )  
 (The full spectrum of **23** is attached to part 5 of this ESI)

ratio calculated using two sets of the signals

$$\begin{aligned} \mathbf{23} : \text{regioisomer} \\ &= 0.91/1 : 0.16/2 \\ &= 92 : 8 \end{aligned}$$

$$\begin{aligned} \mathbf{23} : \text{regioisomer} \\ &= 0.87 : 0.06 \\ &= 94 : 6 \end{aligned}$$

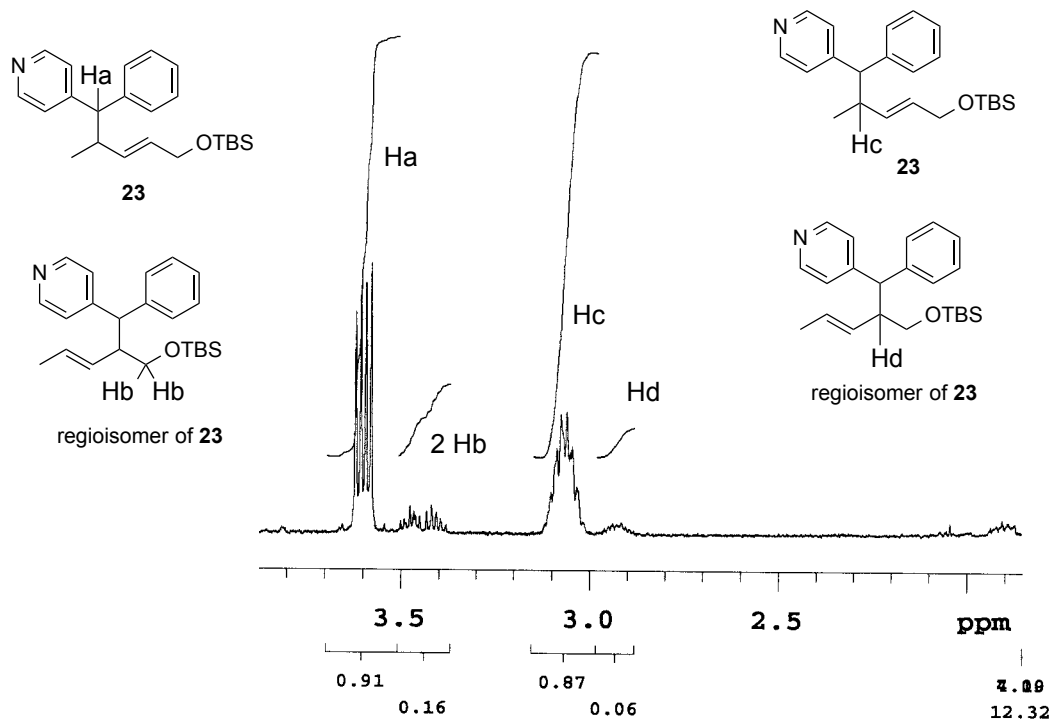

Determination of the diastereomeric ratio of **23**

$$\begin{aligned} &= 50.00 : 47.78 \\ &= 51 : 49 \end{aligned}$$

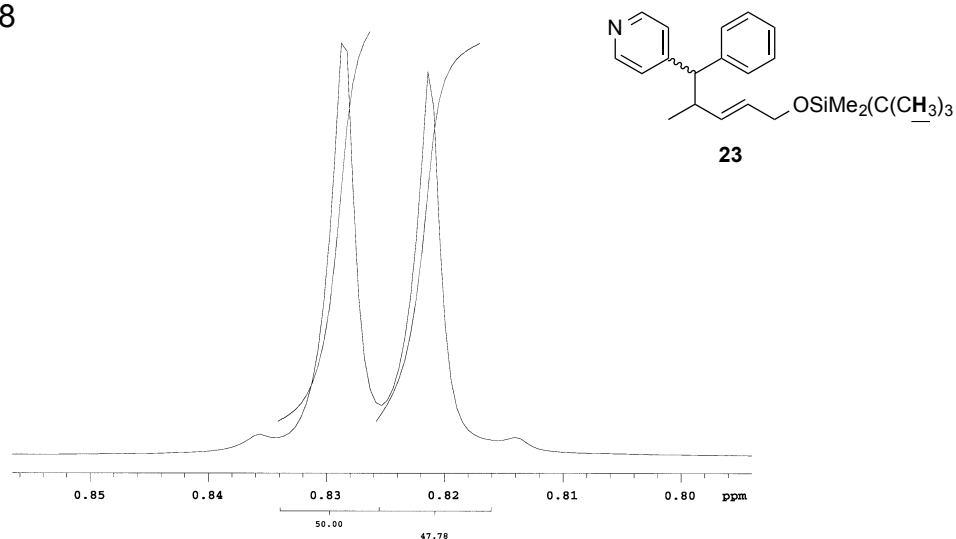

Determination of the ratio of **24** and the regioisomer by  $^1\text{H}$  NMR (400 MHz,  $\text{CDCl}_3$ )  
 (The full spectrum of **24** is attached to part 5 of this ESI)

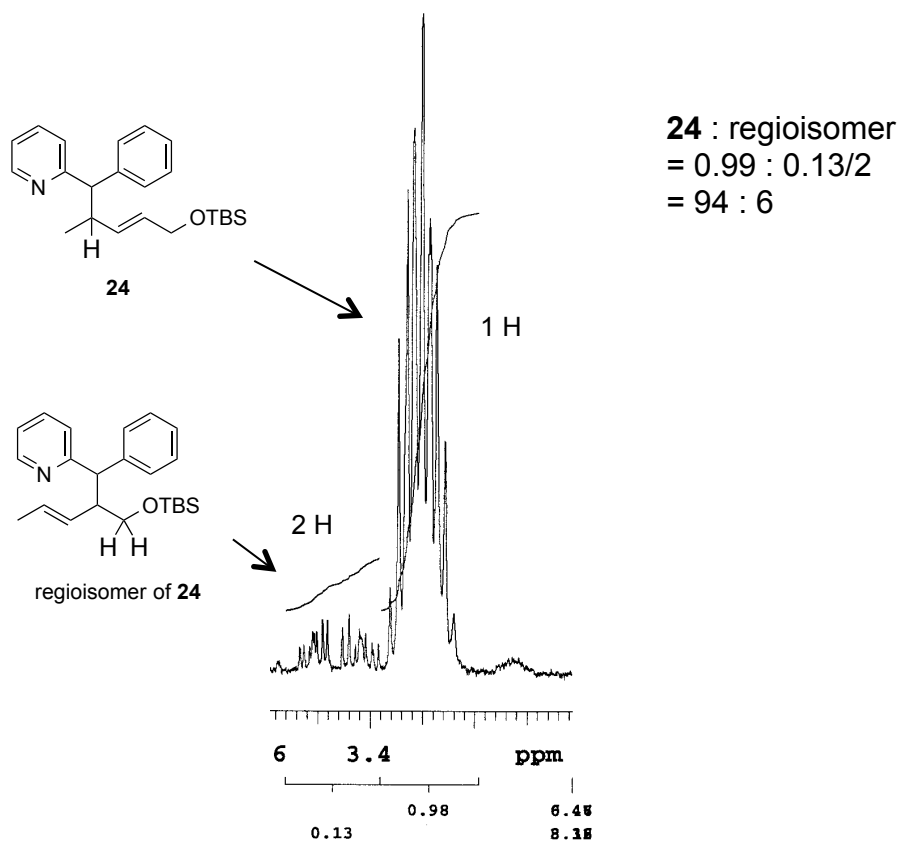

Determination of the diastereomeric ratio of **24**

= 2.64 : 2.56  
 = 51 : 49

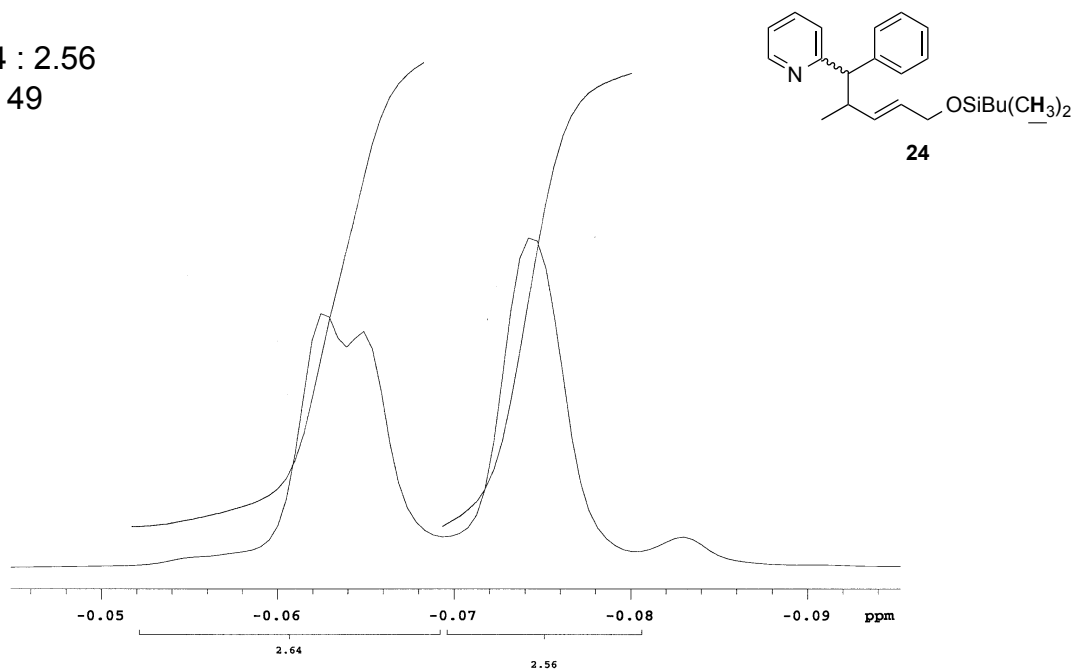

Determination of the ratio of **25** and the regioisomer by  $^1\text{H}$  NMR (400 MHz,  $\text{CDCl}_3$ )  
(The full spectrum of **25** is attached to part 5 of this ESI)

**25** : regioisomer  
= 21.6 : 2.0  
= 91 : 9

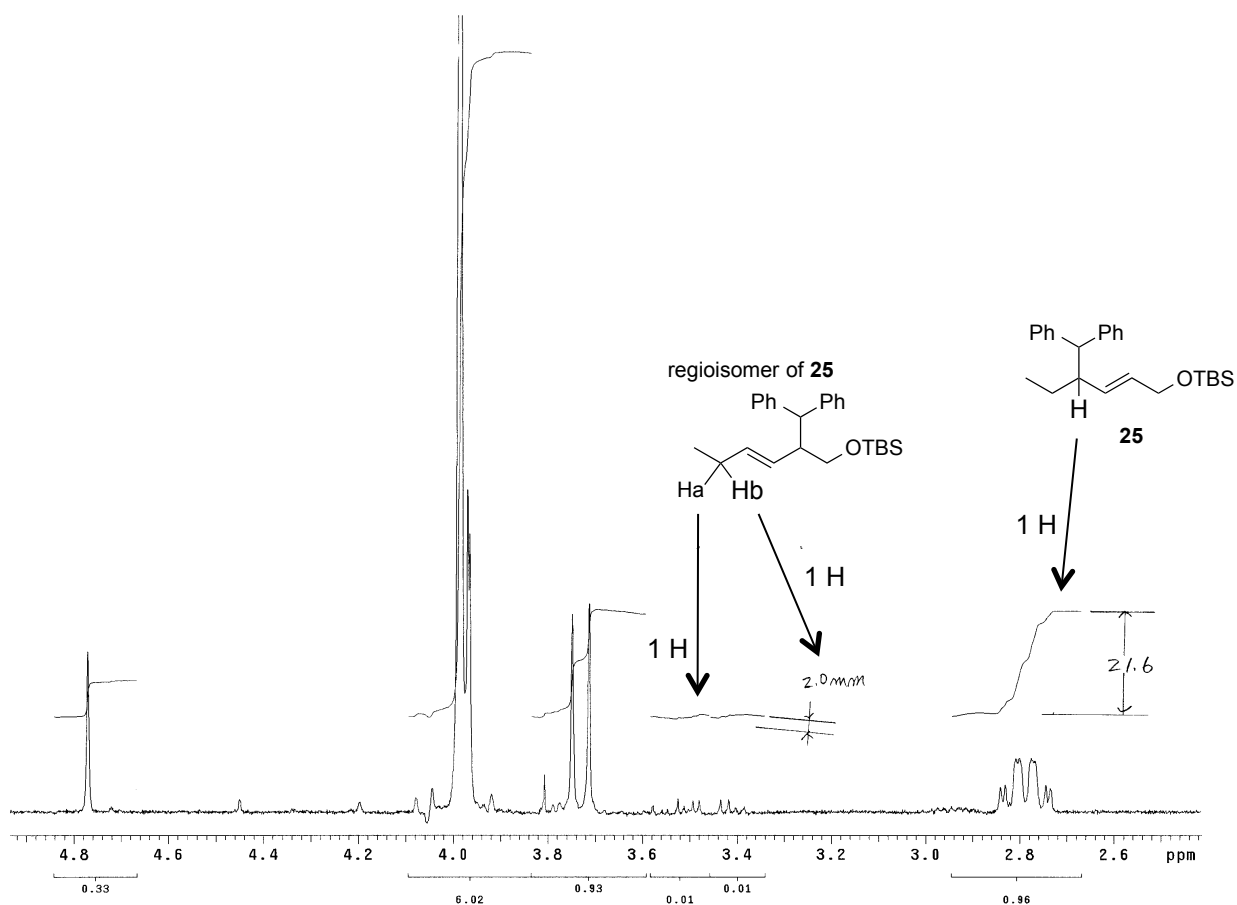

Determination of the ratio of **26** and the regioisomer by  $^1\text{H}$  NMR (400 MHz,  $\text{CDCl}_3$ )  
 (The full spectrum of **26** is attached to part 5 of this ESI)

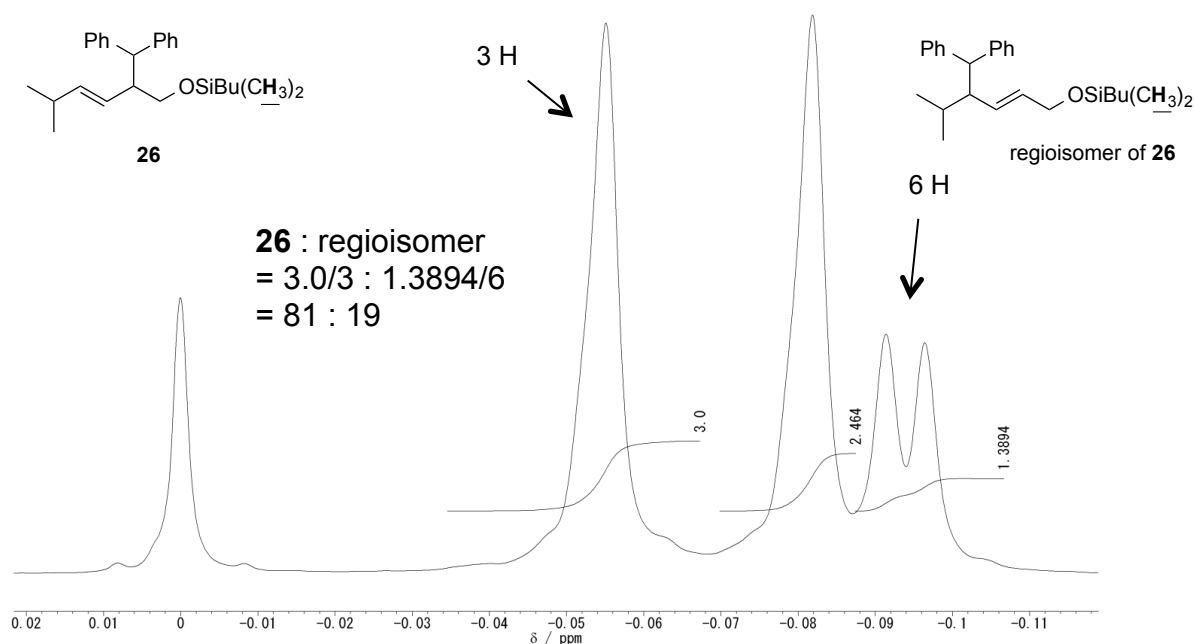

Determination of the ratio of **27** and the regioisomer by  $^1\text{H}$  NMR (400 MHz,  $\text{CDCl}_3$ )  
 (The full spectrum of **27** is attached to part 5 of this ESI)

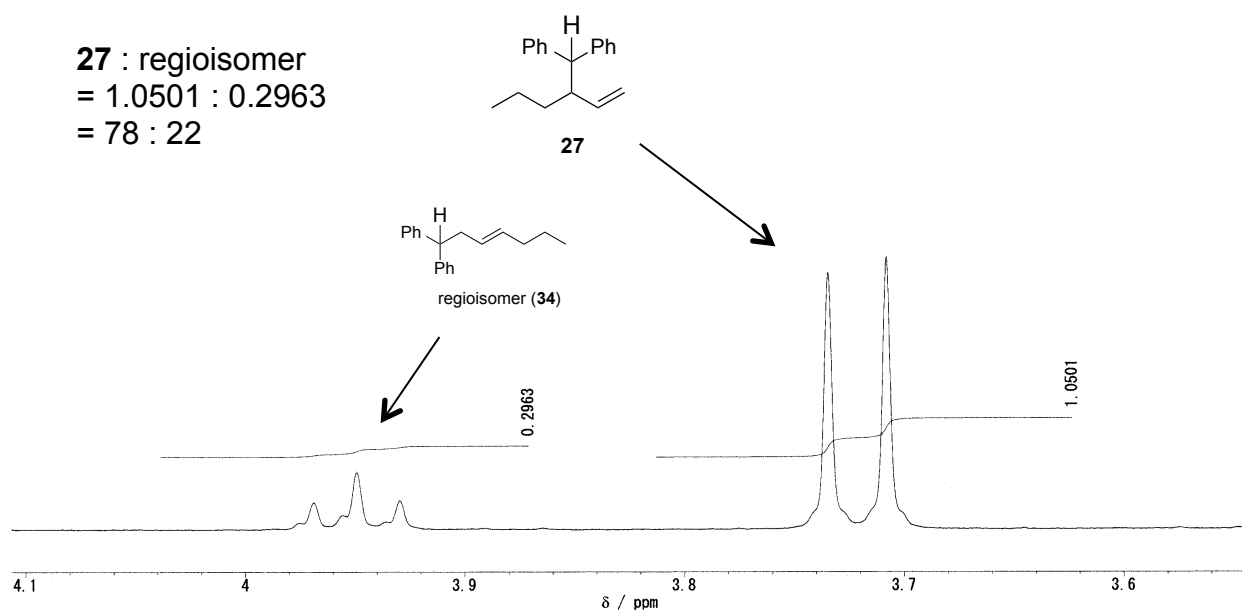

Determination of the enantiomeric purity of (*R*)-**28** by chiral HPLC analysis  
conditions: Chiralcel OJ-H, hexane/*i*-PrOH = 99.5/0.5, 0.1 mL/min, 35 °C

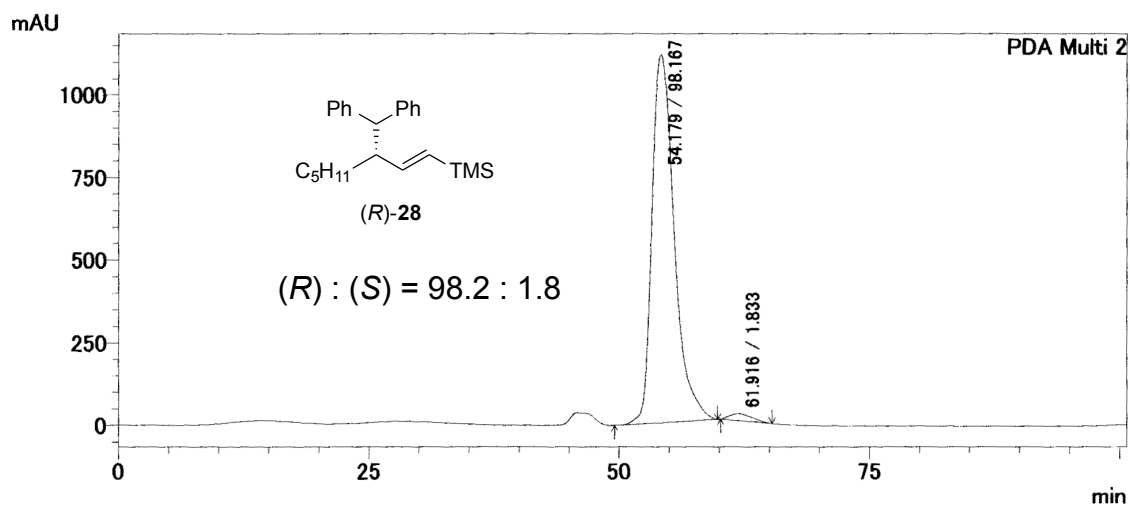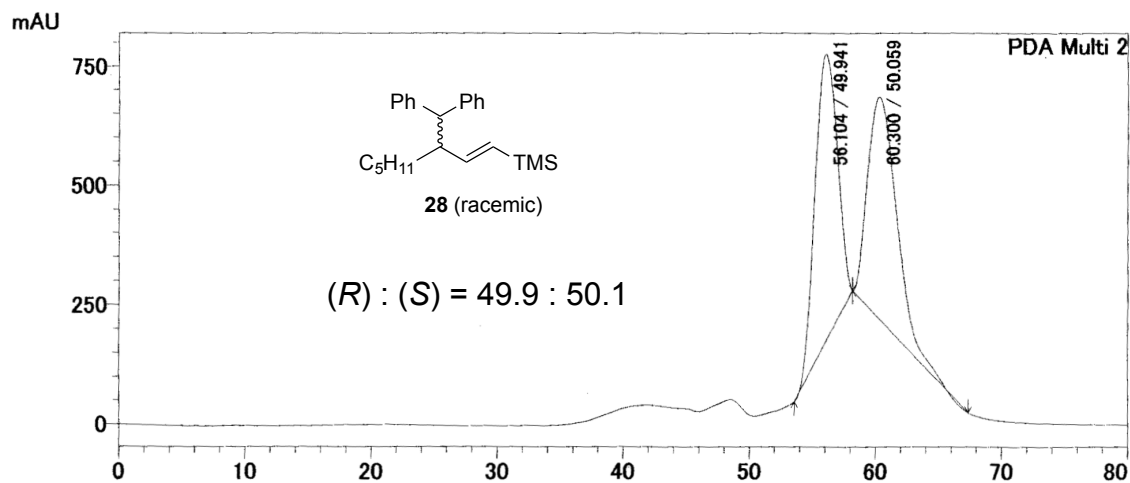

Determination of the product ratios of **30a,e** and **31a,e** by  $^1\text{H}$  NMR for calculation of the regioselectivity, stereoselectivity, and diastereoselectivity (for **30e** and **31e**) (spectra are shown on the next pages)

*Note:* The  $^1\text{H}$  NMR signals of the  $\text{Si}(\text{CH}_3)_2\text{Bu}$  appeared at higher position were referred to the regioisomer on the basis of the fact that the signals for **26** (derived from **8** and **1a**) were observed at a higher position than that of the  $\text{S}_{\text{N}}2$  product. The cis stereochemistry for **31a** and **31e** was confirmed on the basis of the large difference ( $\Delta\delta$  ca. 1 ppm) between the methylene protons on the cyclopentene ring.

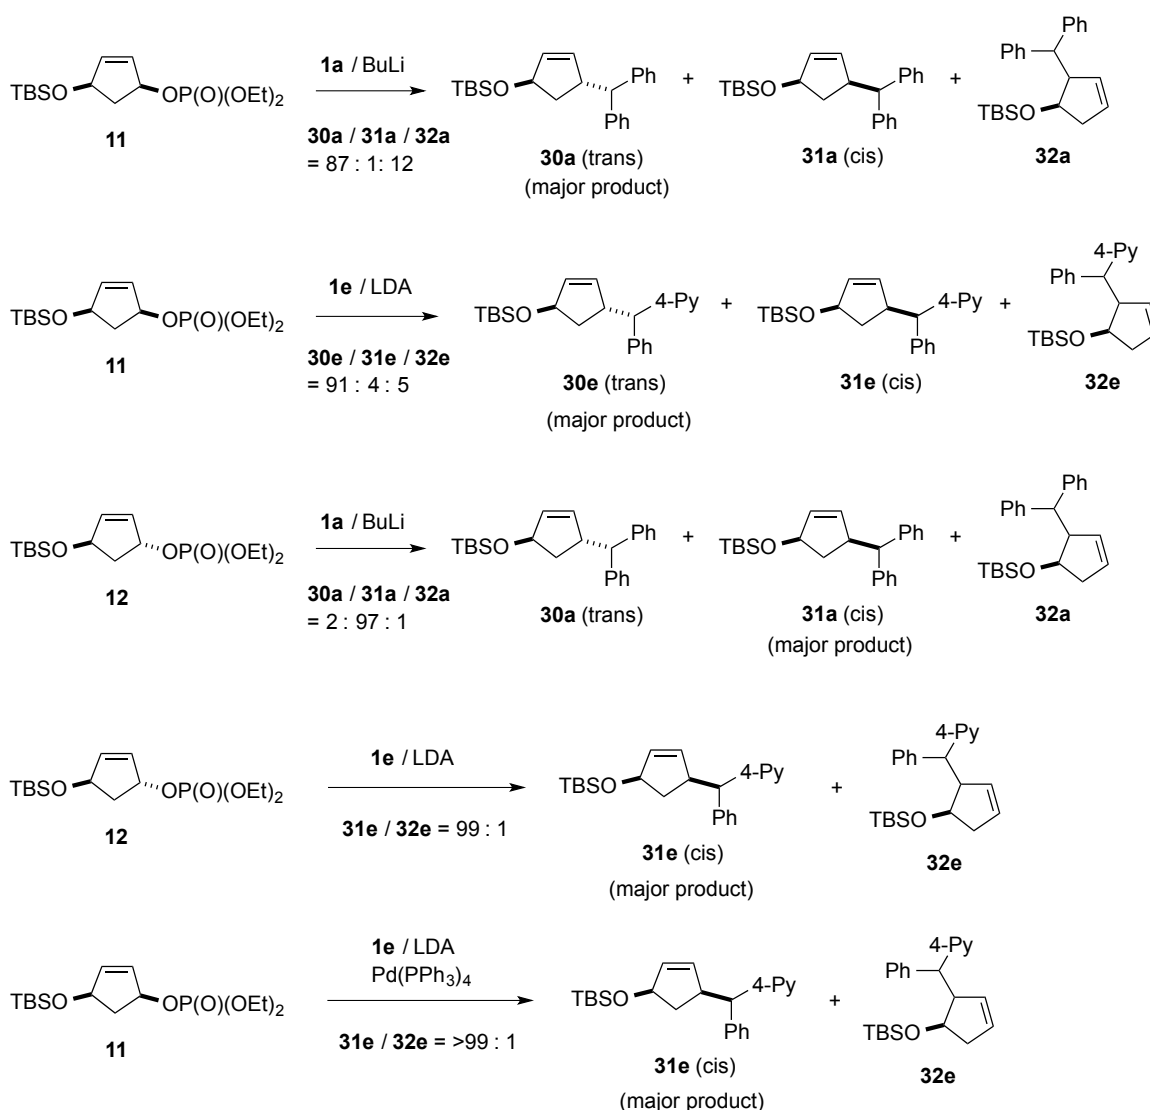



## Determination of the product ratio by $^1\text{H}$ NMR

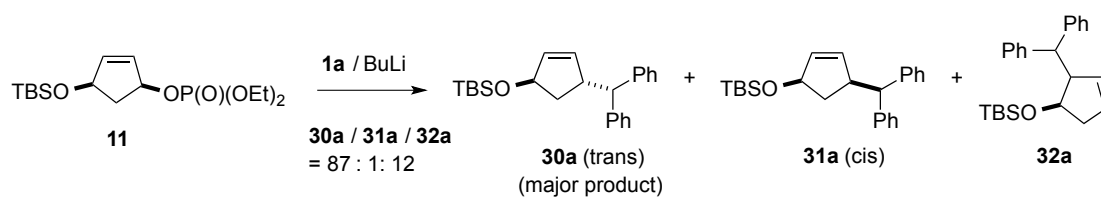

crude product  
 $^1\text{H}$  NMR (400 MHz,  $\text{CDCl}_3$ )

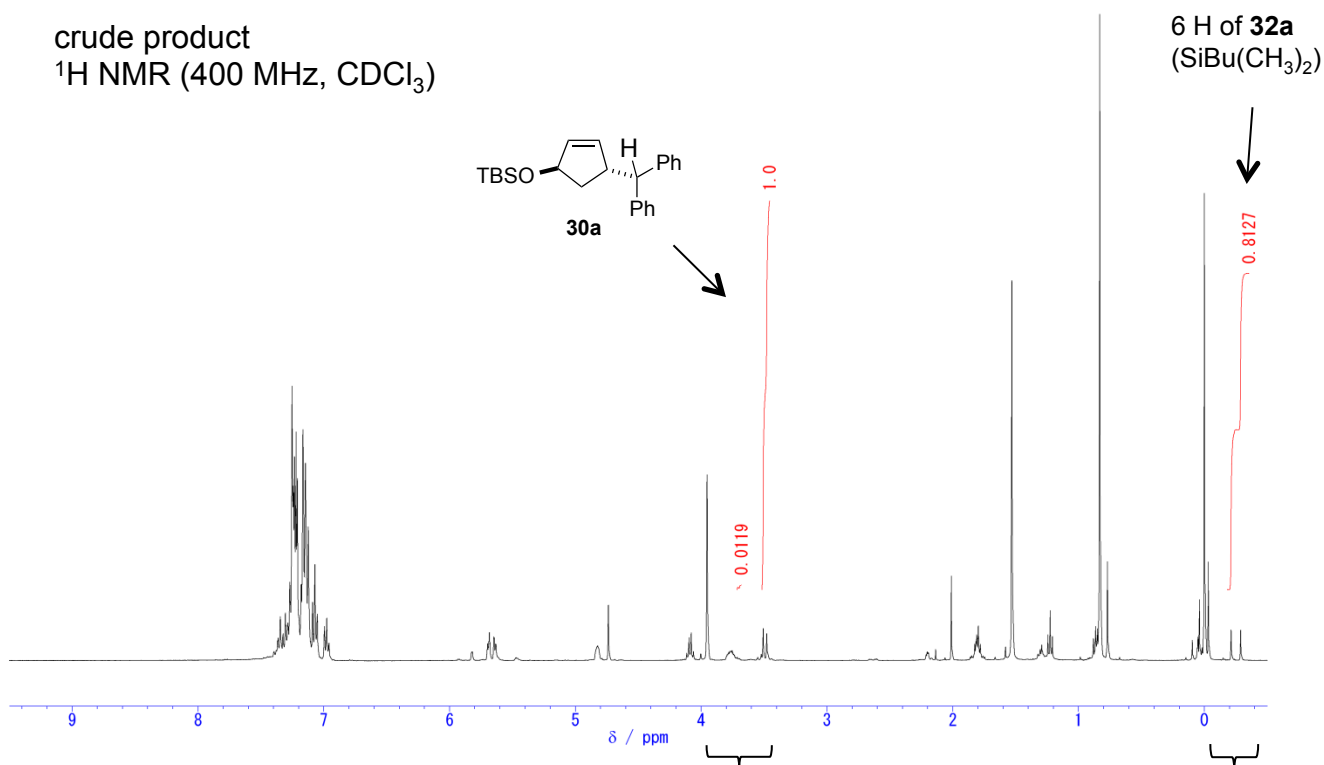

expansion

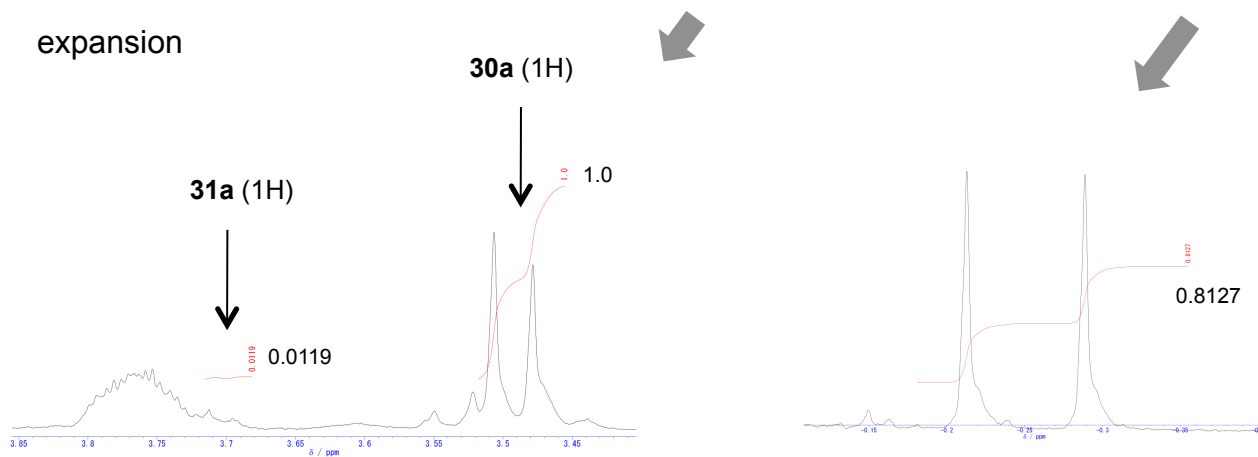

$$\begin{aligned}
 \mathbf{30a : 31a : 32a} &= 1.0/1 : 0.0119/1 : 0.8127/6 = 87 : 1 : 12 \\
 \mathbf{(30a+31a) : 32a} &= (87+1) : 12 = 88 : 12 \quad (\text{regioselectivity}) \\
 \mathbf{30a : 31a} &= 87 : 1 = 99 : 1 \quad (\text{stereoselectivity})
 \end{aligned}$$

Determination of the product ratio by  $^1\text{H}$  NMR

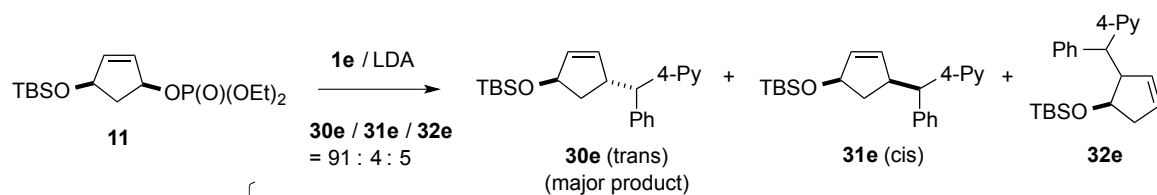

crude product  
 $^1\text{H}$  NMR (400 MHz,  $\text{CDCl}_3$ )

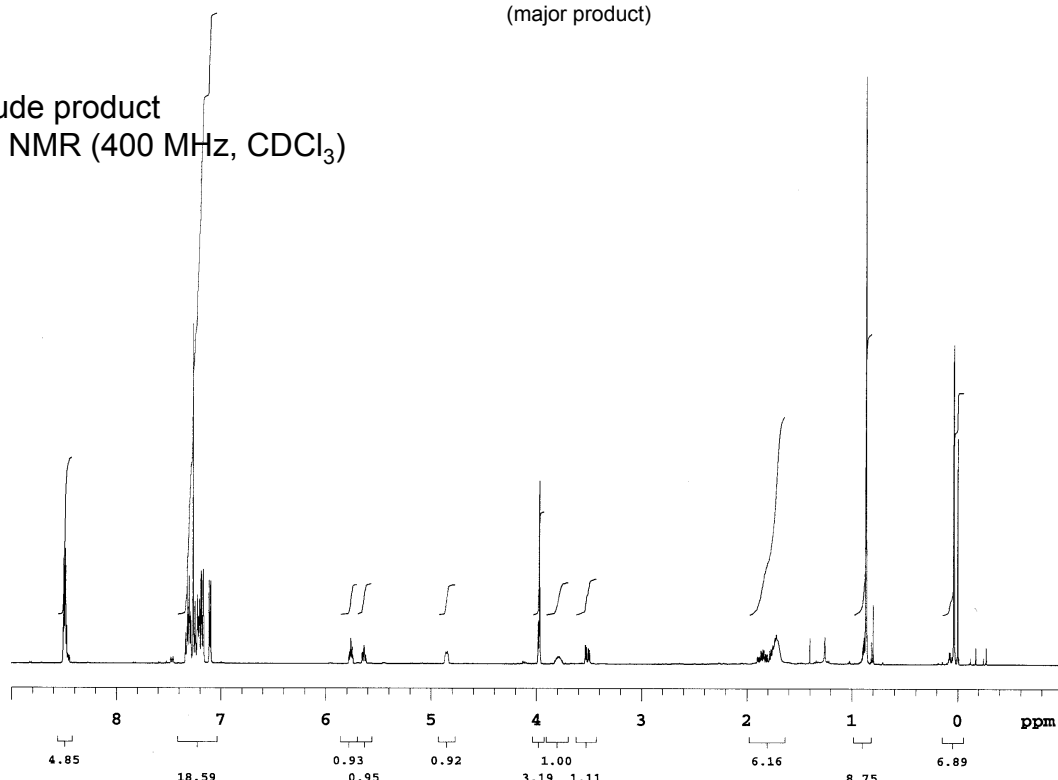

expansion

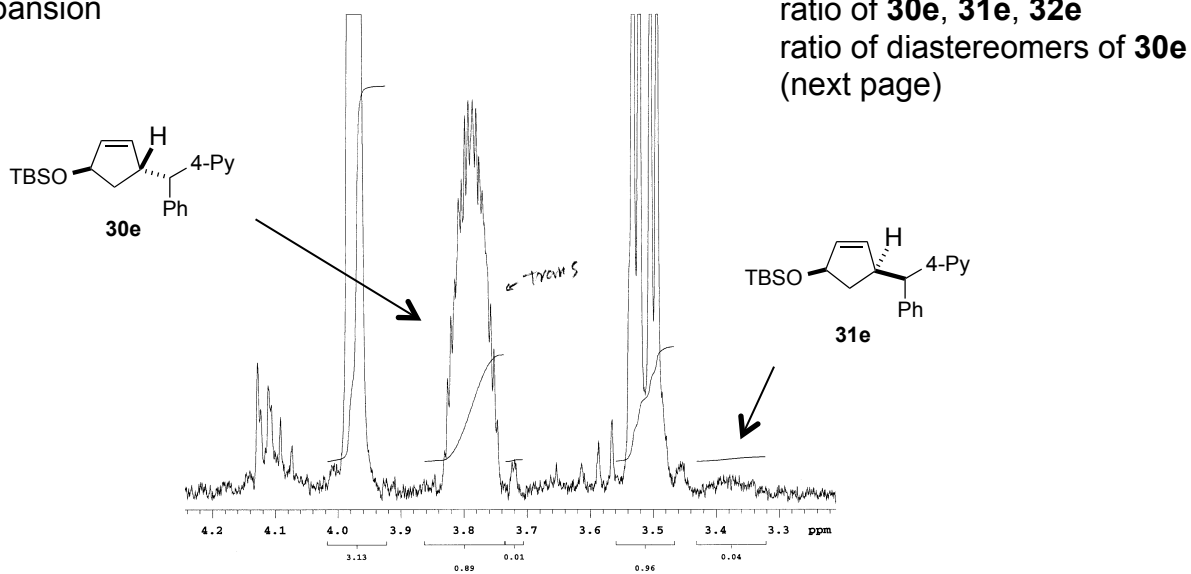

continued to the next page

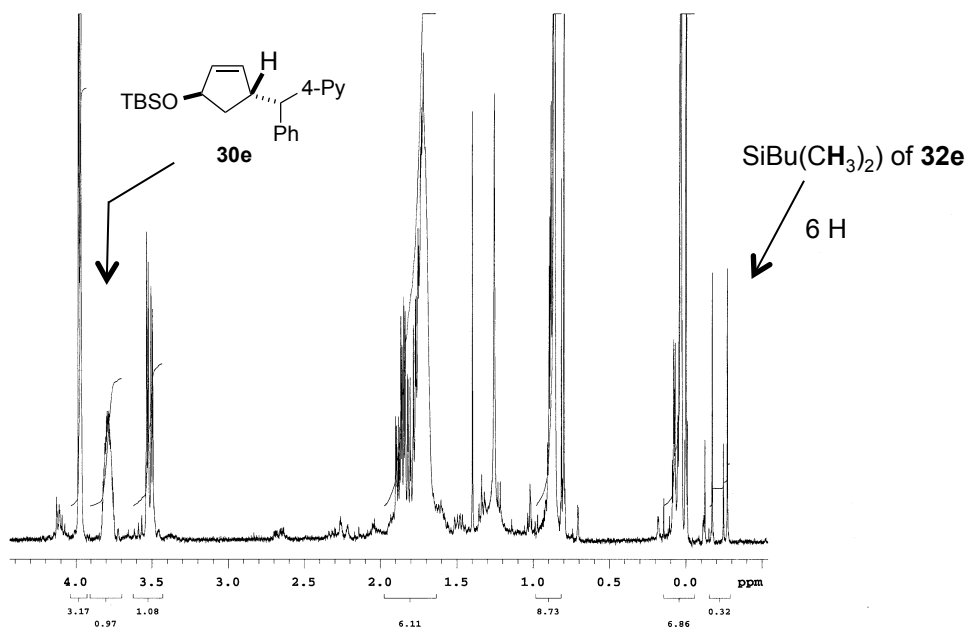

$$\begin{array}{l}
 \mathbf{30e} : \mathbf{31e} = 0.89 : 0.04 \\
 \mathbf{30e} : \mathbf{32e} = 0.97/1 : 0.32/6
 \end{array}
 \left. \vphantom{\begin{array}{l} \mathbf{30e} : \mathbf{31e} \\ \mathbf{30e} : \mathbf{32e} \end{array}} \right\} \Rightarrow
 \begin{array}{l}
 \mathbf{30e} : \mathbf{31e} : \mathbf{32e} = 91 : 4 : 5 \\
 (\mathbf{30e} + \mathbf{31e}) : \mathbf{32e} = (91 + 4) : 5 = 95 : 5 \\
 \text{(regioselectivity)} \\
 \mathbf{30e} : \mathbf{31e} = 91 : 4 = 96 : 4 \\
 \text{(stereoselectivity)}
 \end{array}$$

Determination of the diastereomeric ratio of **30e**

$$\begin{array}{l}
 = 2.60 : 2.27 \\
 = 53 : 47
 \end{array}$$

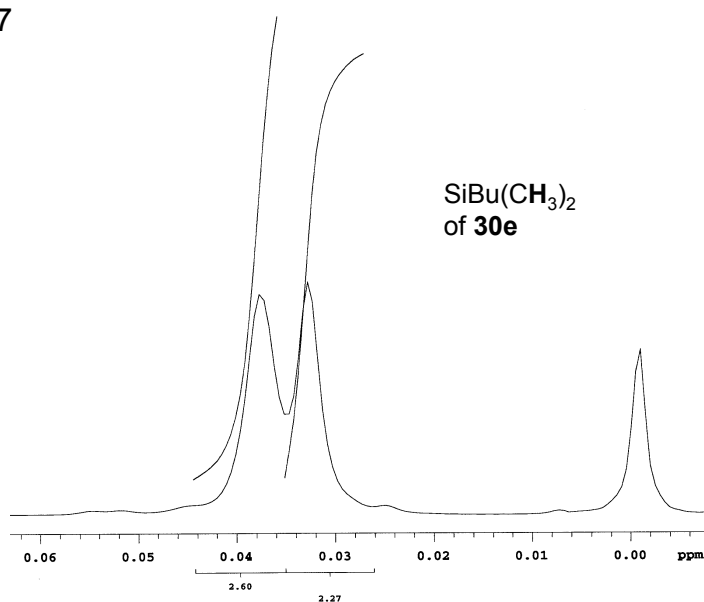

## Determination of the product ratio by $^1\text{H}$ NMR

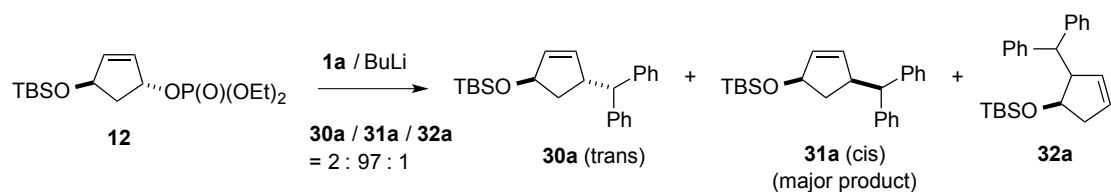

$$\left. \begin{array}{l} 30a : 31a = 0.02 : 1.00 \\ 31a : 32a = 5.64/6 : 0.05/6 \end{array} \right\} \Rightarrow \begin{array}{l} 30a : 31a : 32a = 2 : 97 : 1 \\ (30a+31a) : 32a = (2+97) : 1 = 99 : 1 \\ \text{(regioselectivity)} \\ 30a : 31a = 2 : 97 = 2 : 98 \\ \text{(stereoselectivity)} \end{array}$$

expanded  $^1\text{H}$  NMR (300 MHz,  $\text{CDCl}_3$ )  
 (The full spectrum of **31a** is attached to part 5 of this ESI)

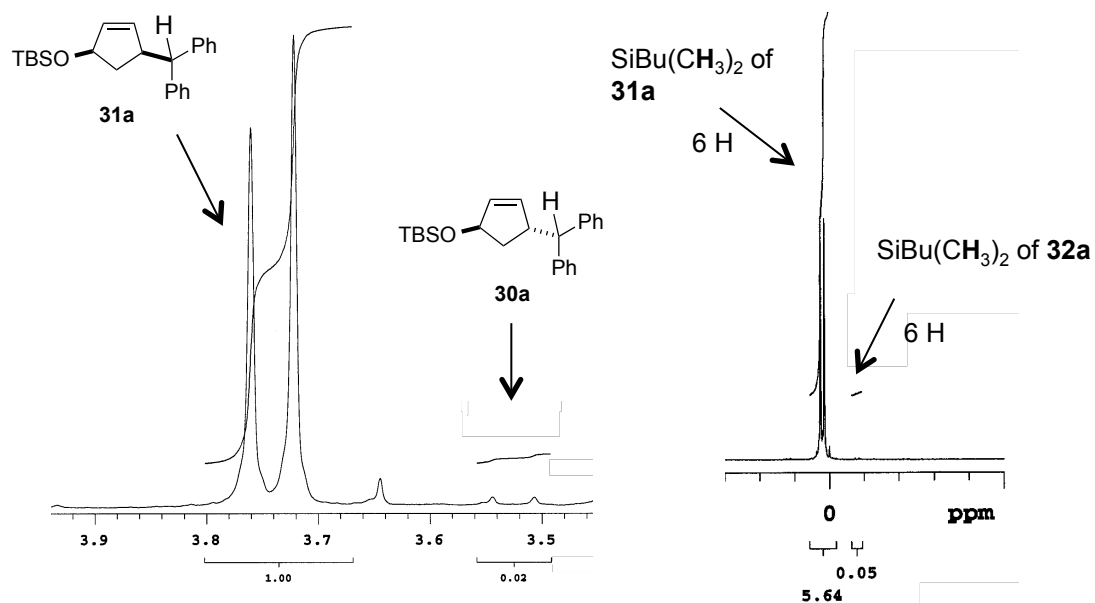

## Determination of the product ratio by $^1\text{H}$ NMR

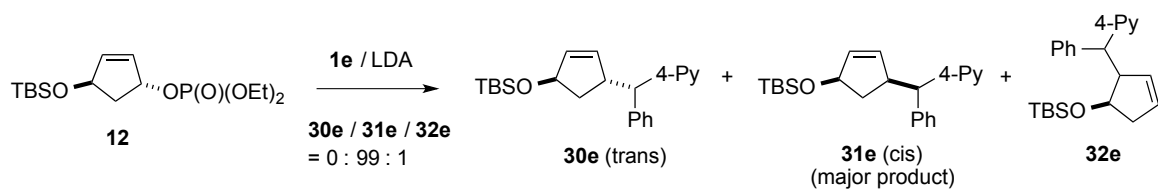

$30e : 31e = 0 : 1.00$  (below)  $\rightarrow$   $30e : 31e : 32e = 0 : 99 : 1$   
 $31e : 32e = 99 : 1$  (next page) (regioselectivity)  
 $30e : 31e = 0 : 100$  (stereoselectivity)

ratio of diastereomers of **31e**  
 $= 56 : 44$  (next page)

expanded  $^1\text{H}$  NMR (400 MHz,  $\text{CDCl}_3$ )  
 (The full spectrum of **31e** is attached to part 5 of this ESI)

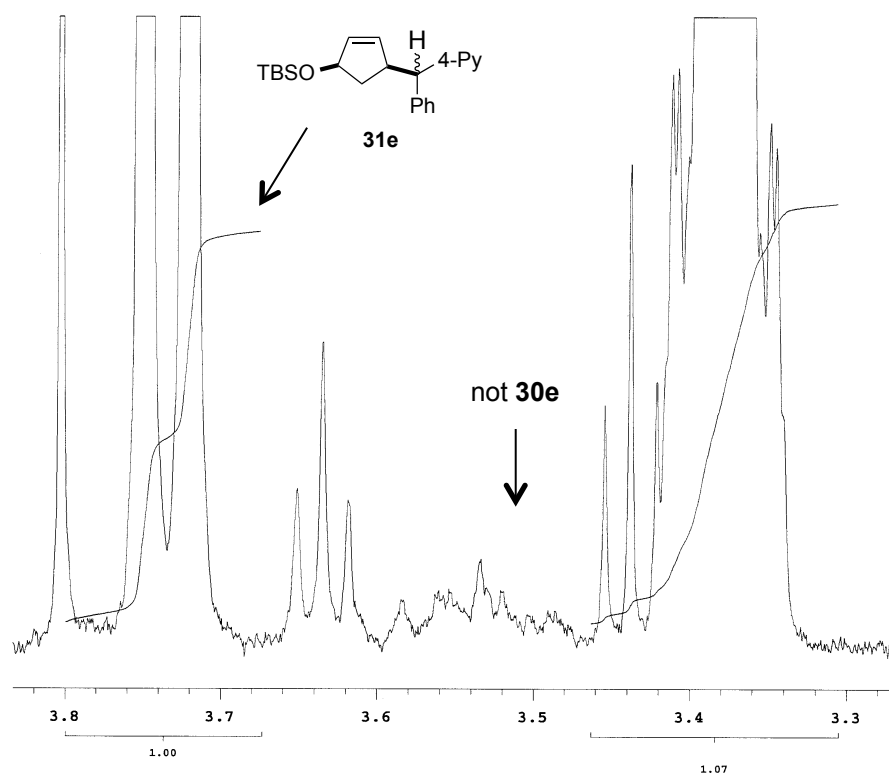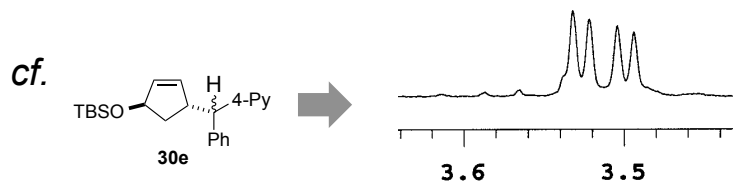

continued to the next page

expanded  $^1\text{H}$  NMR (400 MHz,  $\text{CDCl}_3$ )

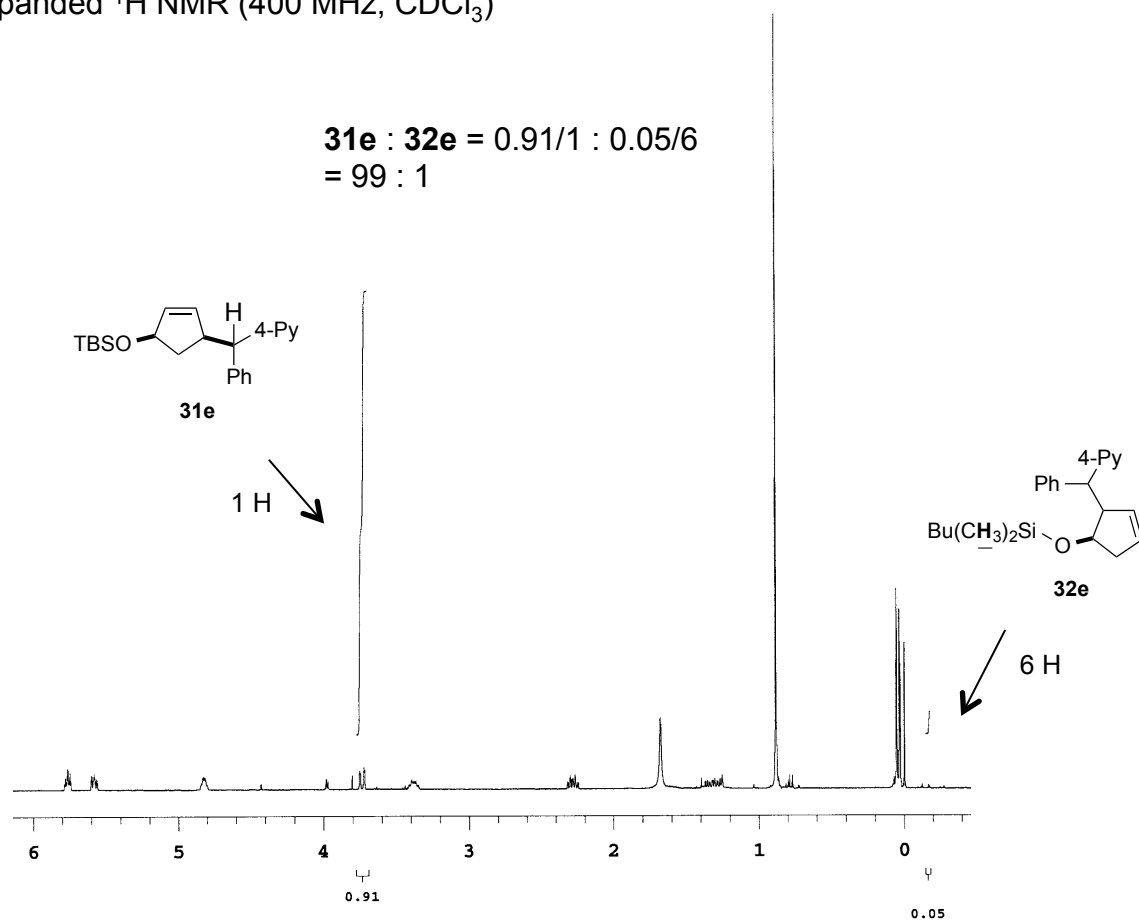

Determination of the diastereomeric ratio of **31e**

= 1.39 : 1.10

= 56 : 44

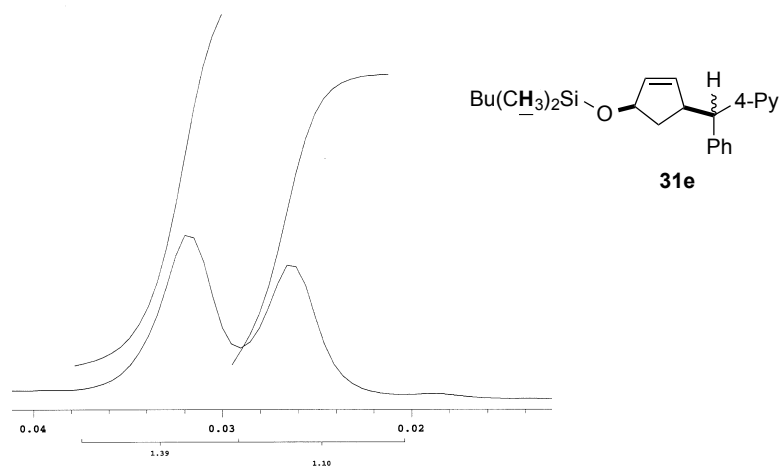

Determination of the product ratio by <sup>1</sup>H NMR

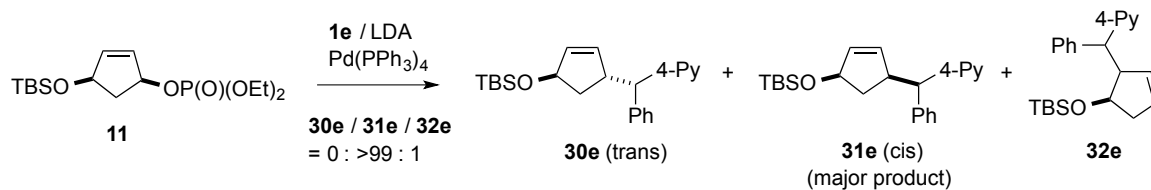

30e : 31e = 0 : 0.99 (below)

31e : 32e = 99.8 : 0.2 (next page)

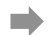

30e : 31e : 32e = 0 : >99 : 1

31e : 32a = >99 : 1 (regioselectivity)

30e : 31e = 0 : 100 (stereoselectivity)

ratio of diastereoisomers of 31e

= 57 : 43 (next page)

expanded <sup>1</sup>H NMR (400 MHz, CDCl<sub>3</sub>)

(The full spectrum of 31e is attached to part 5 of this ESI)

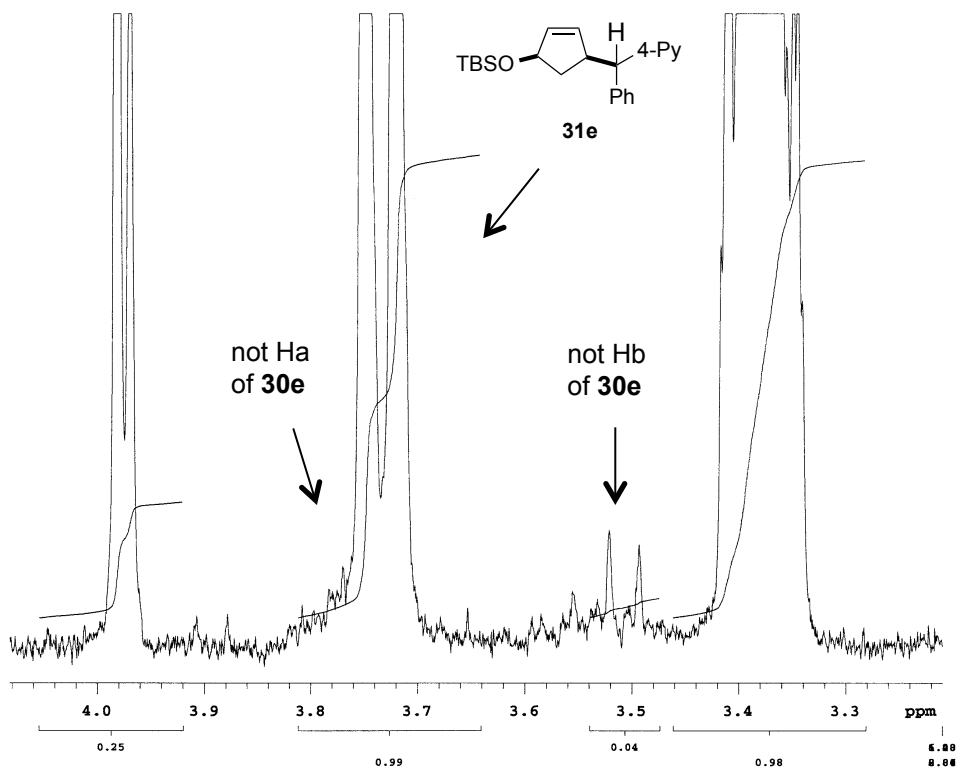

cf.

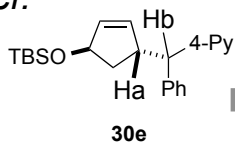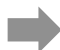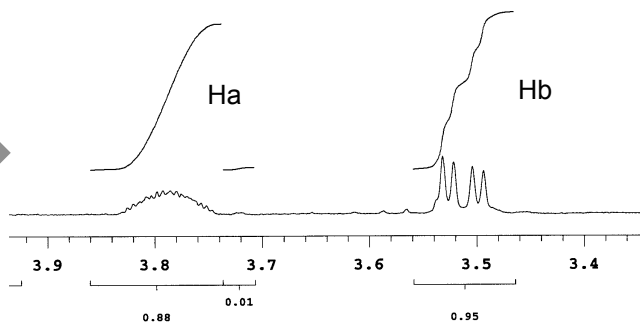

continued to the next page

**31e : 32e = 1.02/1 : 0.01/6**  
 = 99.8 : 0.2

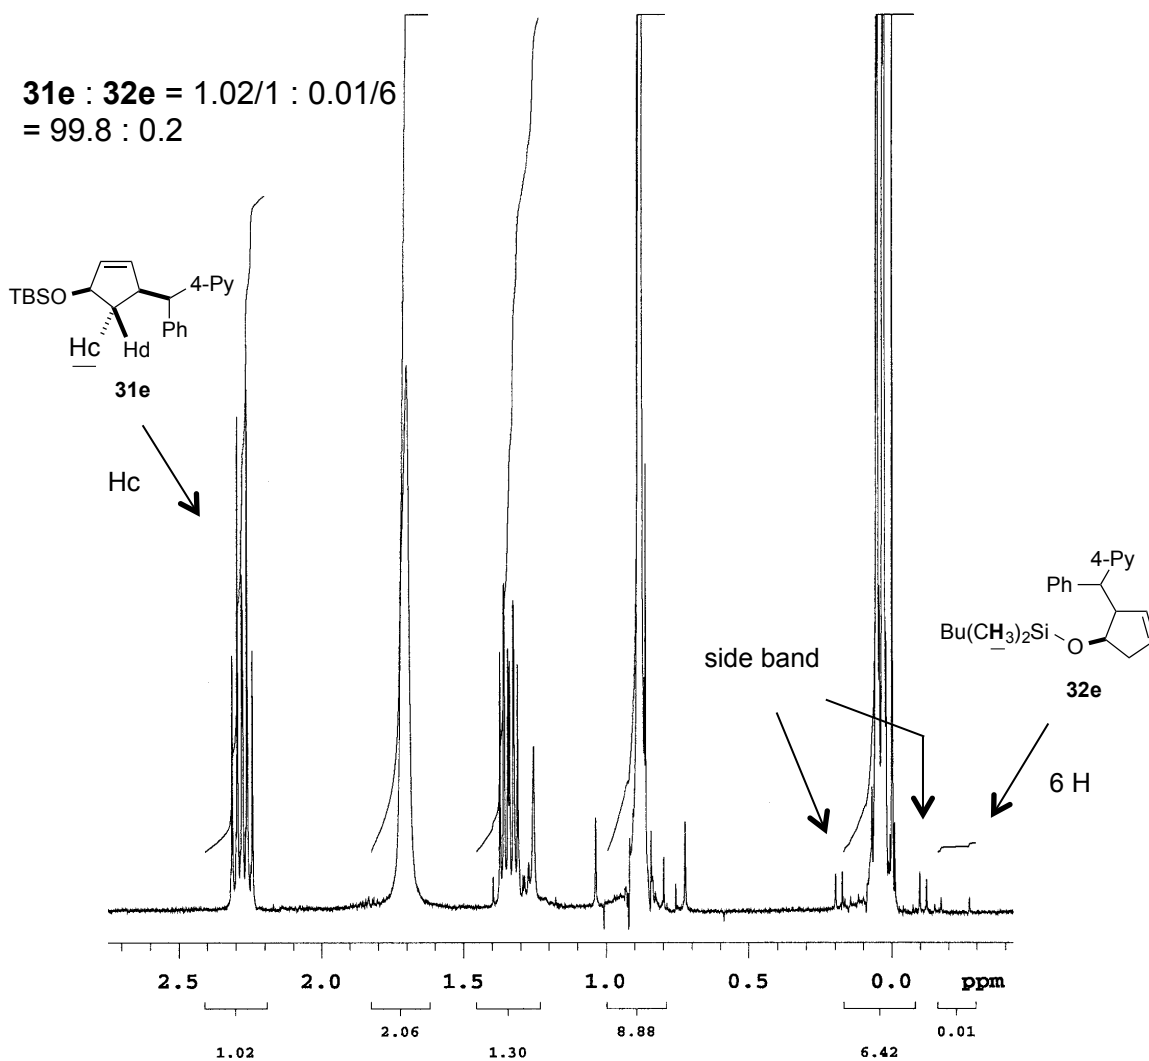

**Determination of the diastereomeric ratio of 31e**

= 1.36 : 1.81  
 = 43 : 57

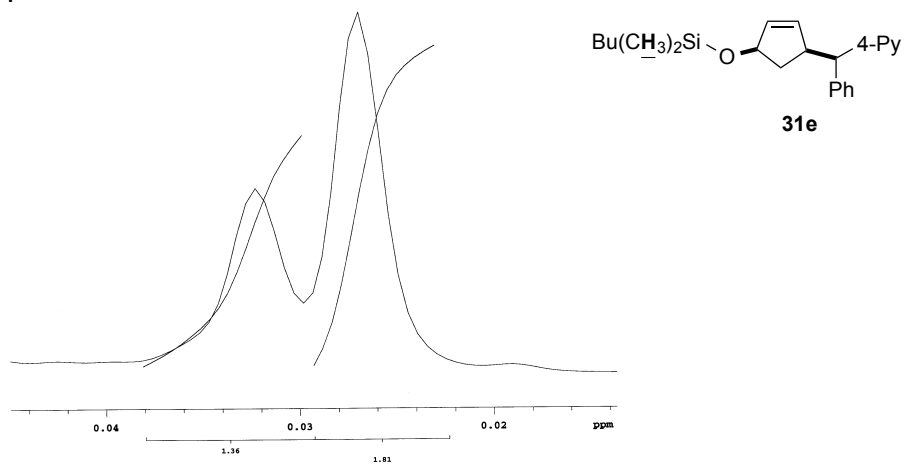



Determination of the olefinic purity of **35** by  $^1\text{H}$  and  $^{13}\text{C}$  NMR  
 (The full spectra of **35** are attached to part 5 of this ESI)

*E/Z* ratio calculated using  
 three sets of the signals

$$\begin{aligned} E\text{-olefin} : Z\text{-olefin} &= 5.50/6 : 0.06/3 \\ &= 97.9 : 2.1 \\ &= 98 : 2 \end{aligned}$$

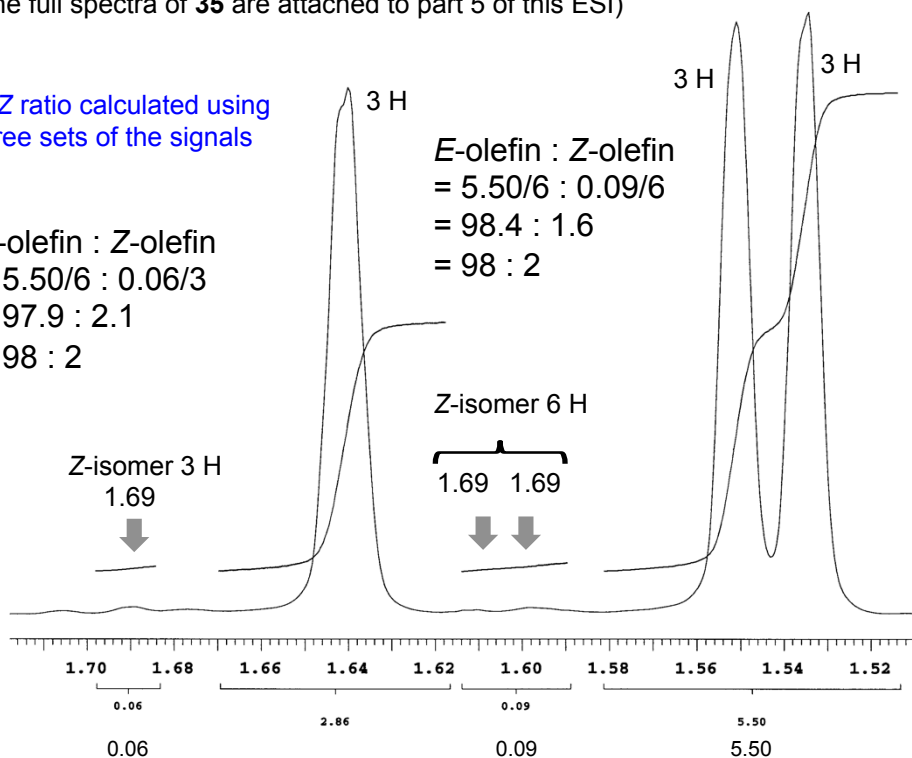

*E*-product 3 H x 2

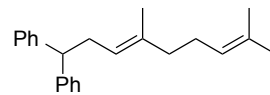

*E*-product **35**

$^1\text{H}$  NMR (400 MHz,  $\text{CDCl}_3$ )

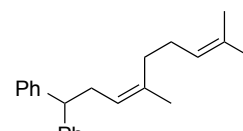

*Z*-isomer **37**

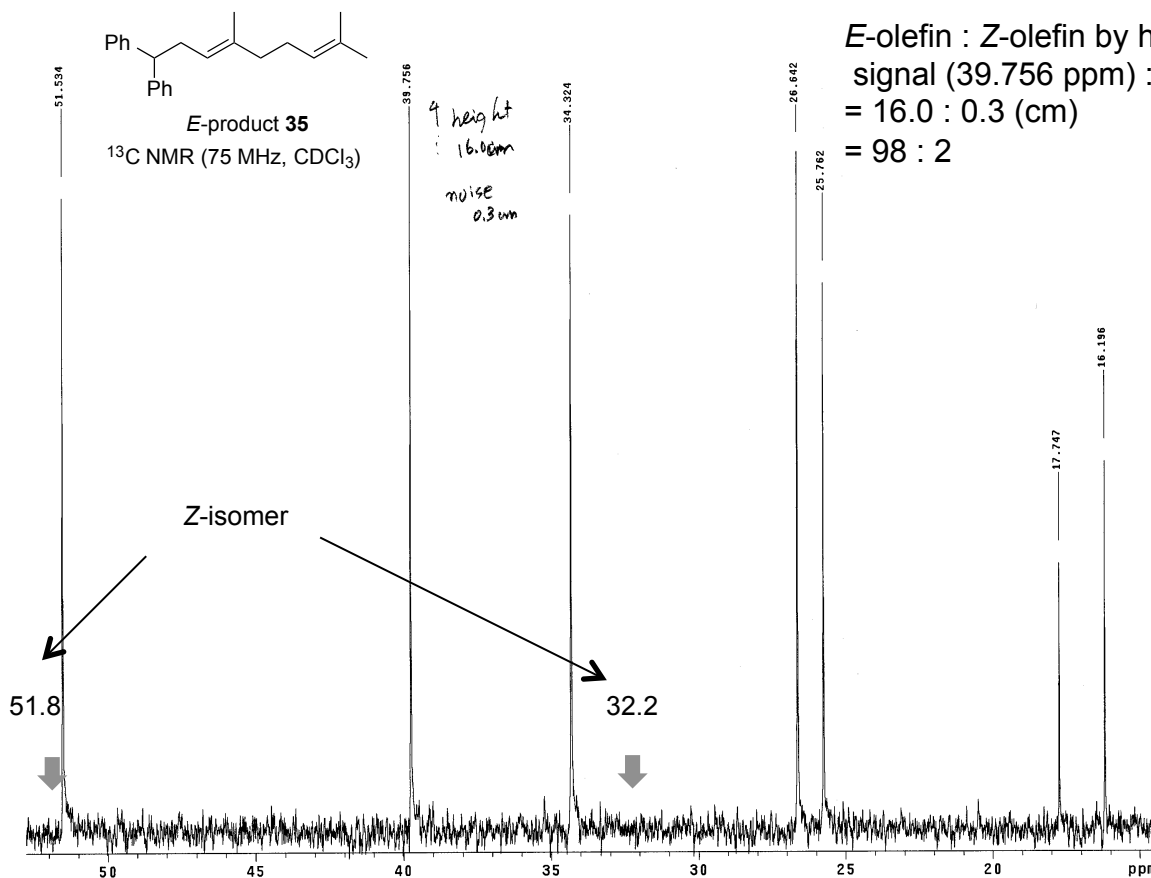

*E*-olefin : *Z*-olefin by height ratio of  
 signal (39.756 ppm) : noise  
 = 16.0 : 0.3 (cm)  
 = 98 : 2

Determination of the olefinic purity of **36** by  $^1\text{H}$  and  $^{13}\text{C}$  NMR  
 (The full spectra of **36** are attached to part 5 of this ESI)

*E/Z* ratio calculated using  
 two sets of the signals

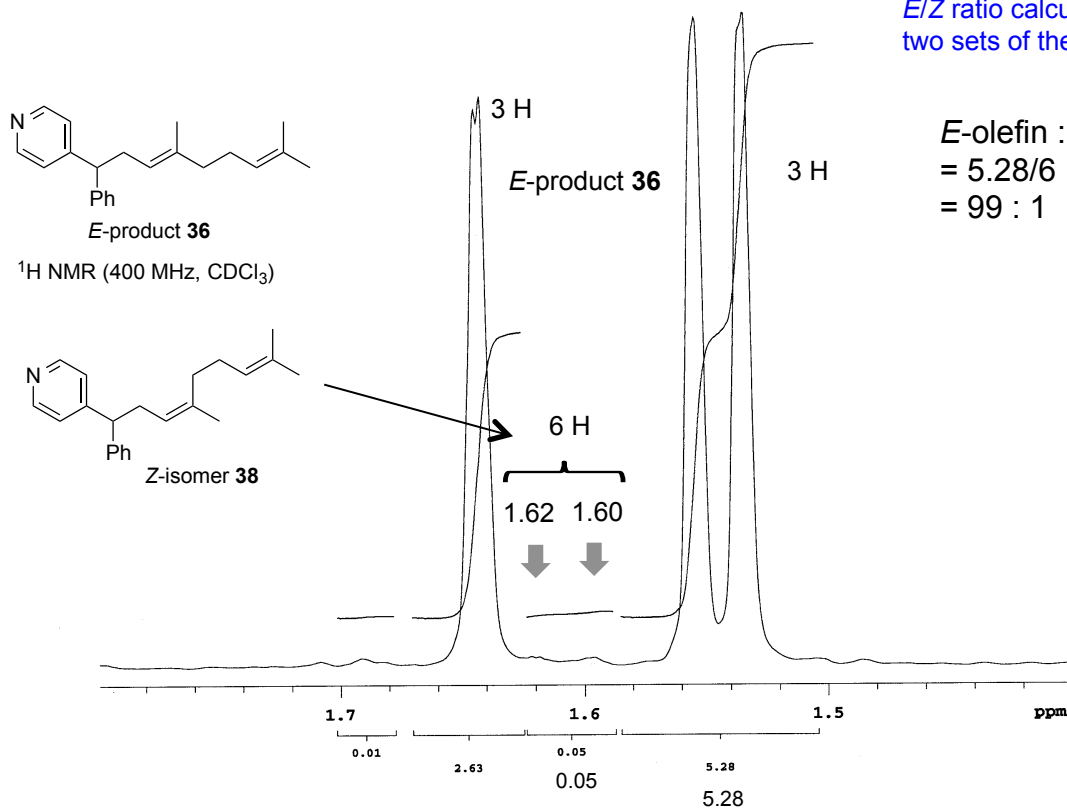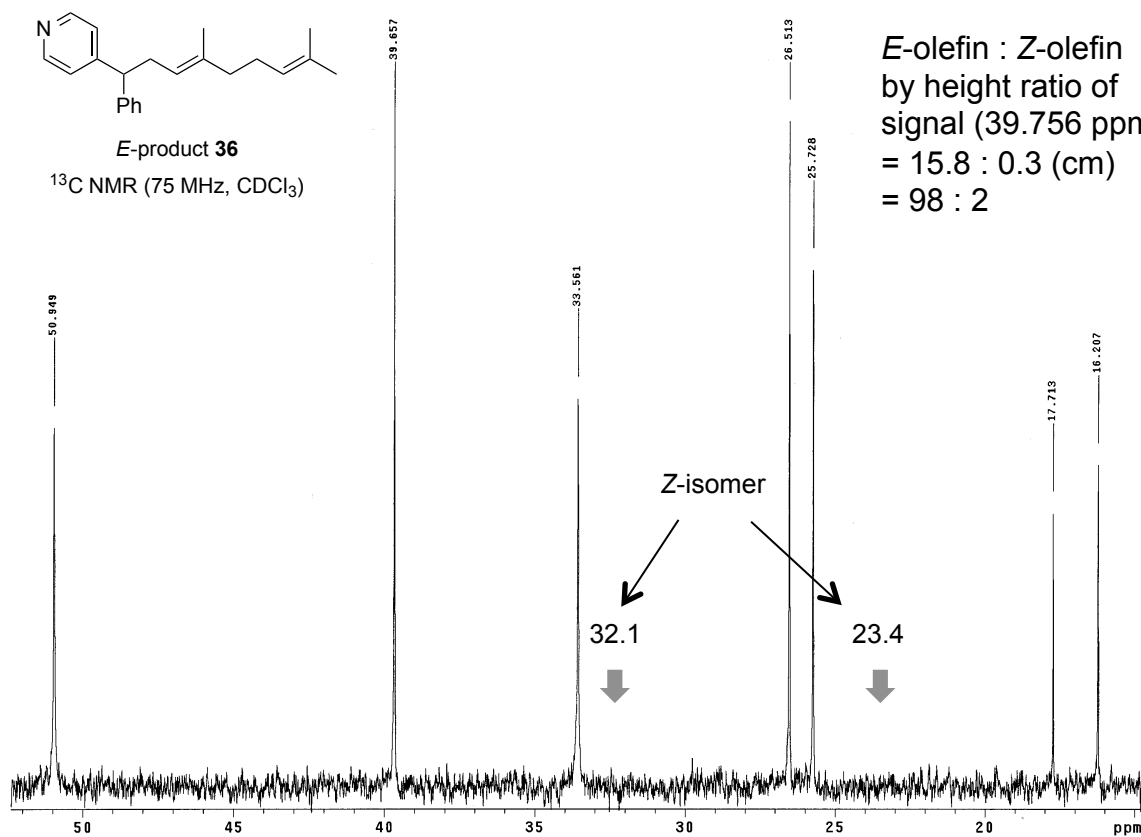

Determination of the olefinic purity of **37** by  $^1\text{H}$  and  $^{13}\text{C}$  NMR  
 (The full spectra of **37** are attached to part 5 of this ESI)

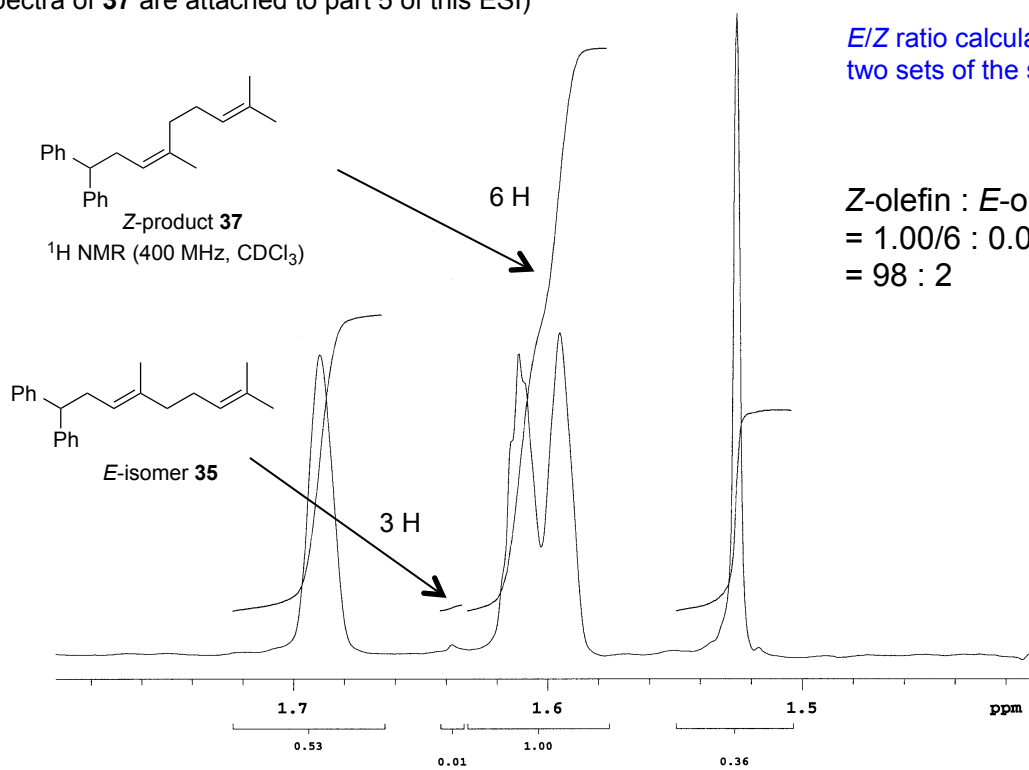

*E/Z* ratio calculated using two sets of the signals

$$\begin{aligned} \text{Z-olefin} : \text{E-olefin} &= 1.00/6 : 0.01/3 \\ &= 98 : 2 \end{aligned}$$

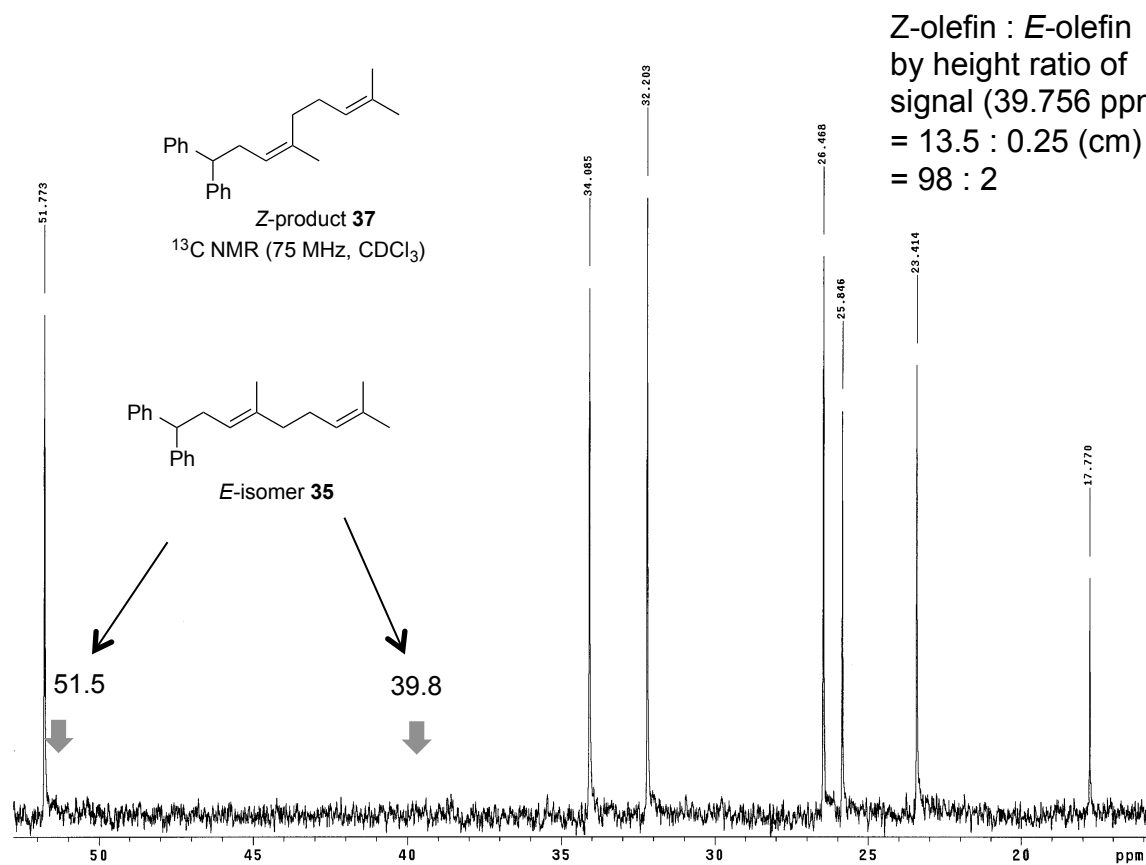

$$\begin{aligned} \text{Z-olefin} : \text{E-olefin} &\text{ by height ratio of} \\ &\text{signal (39.756 ppm) : noise} \\ &= 13.5 : 0.25 \text{ (cm)} \\ &= 98 : 2 \end{aligned}$$

Determination of the olefinic purity of **38** by  $^1\text{H}$  and  $^{13}\text{C}$  NMR  
 (The full spectra of **38** are attached to part 5 of this ESI)

*E/Z* ratio calculated using two sets of the signals

Z-olefin : E-olefin  
 = 5.56/6 : 0.08/6  
 = 99 : 1

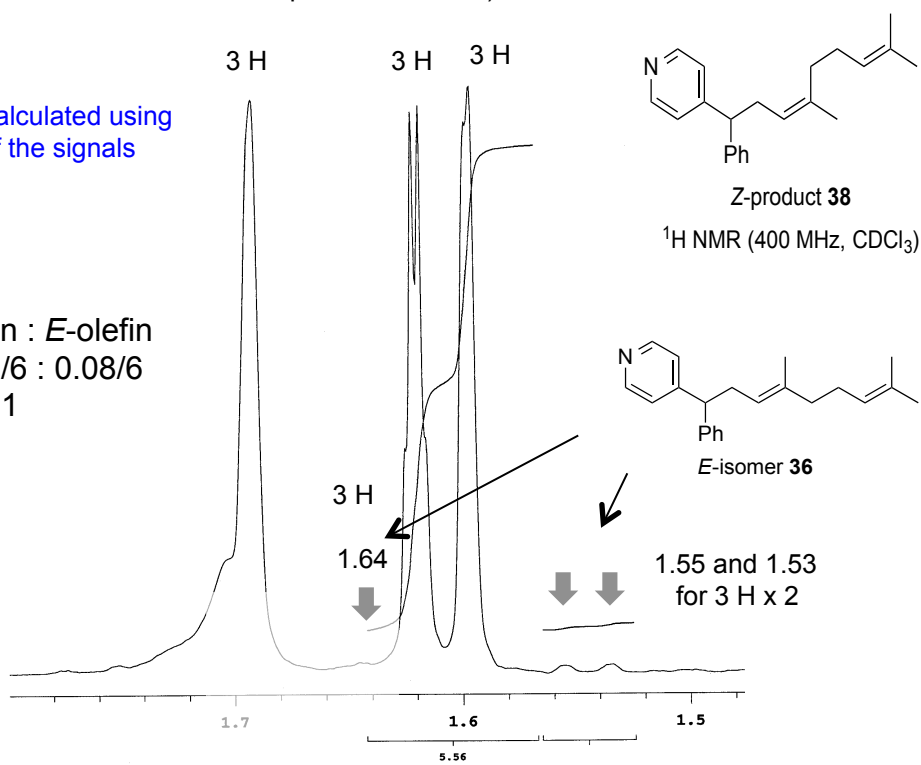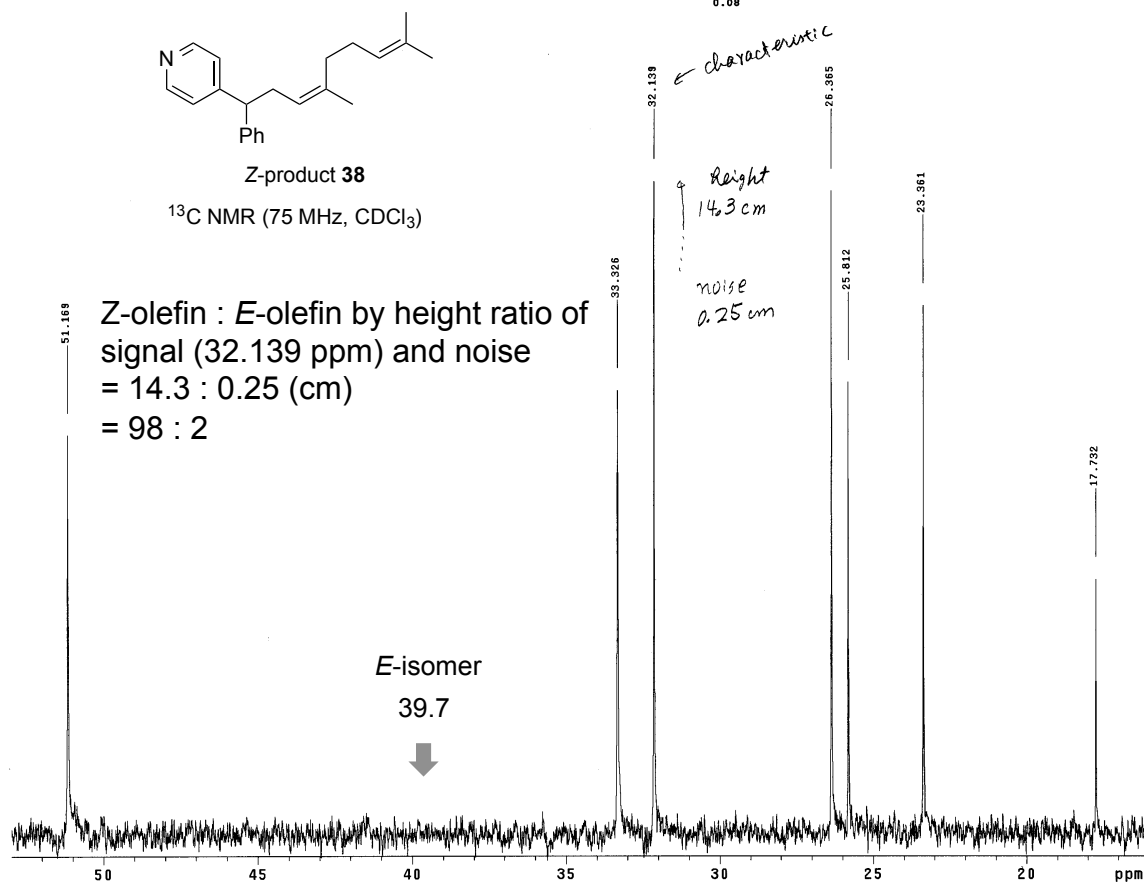

Determination of the enantiomeric purity of the acid (*R*)-**5** by chiral HPLC analysis  
conditions: Chiralcel AS-H, hexane/*i*-PrOH = 99/1, 1 mL/min, 40 °C

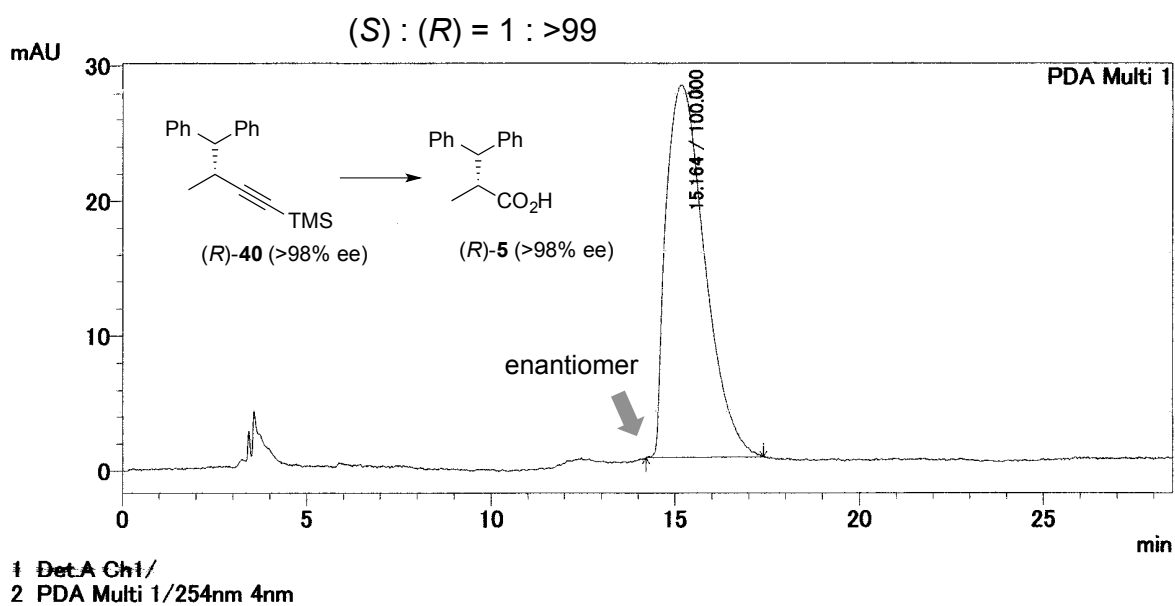

(*S*) : (*R*) = 48.445 : 51.555 = 48.4 : 51.6

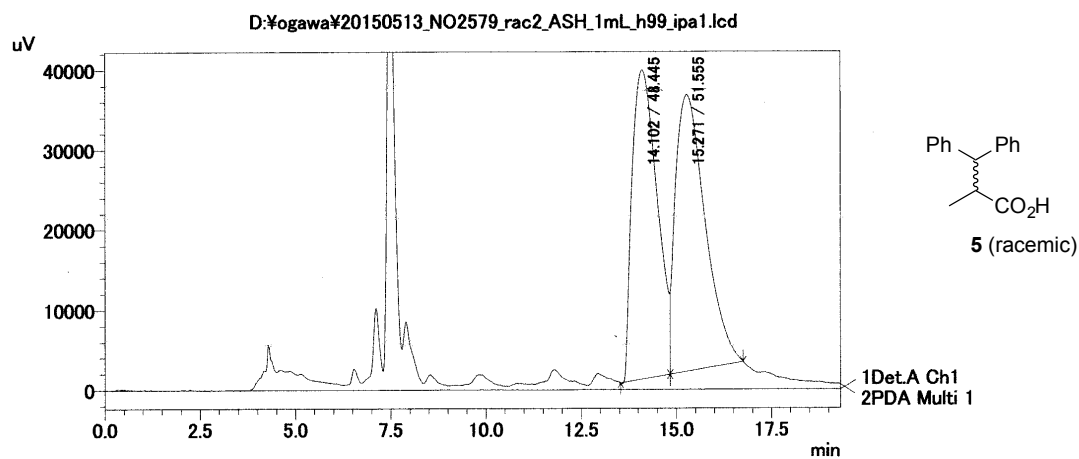

Determination of the enantiomeric purity of (*R*)-**41** by chiral HPLC analysis  
conditions: Chiralcel OD-H, hexane/*i*-PrOH = 99.9/0.1, 0.5 mL/min, 35 °C

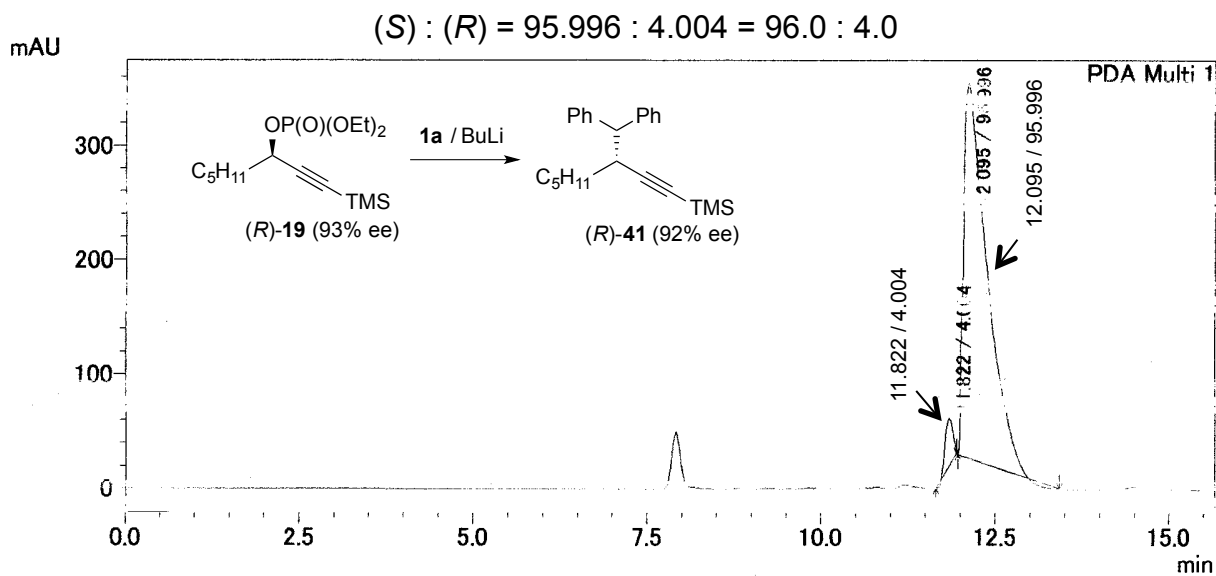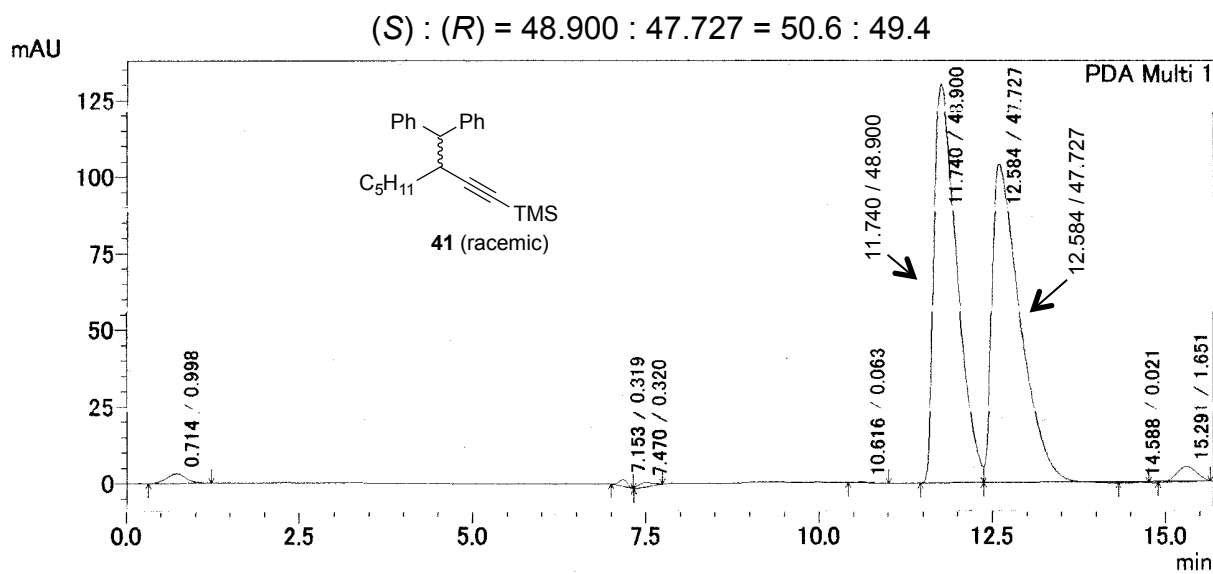

**Part 5:  $^1\text{H}$  and  $^{13}\text{C}$  NMR Spectra to Establish Identity and Purity**

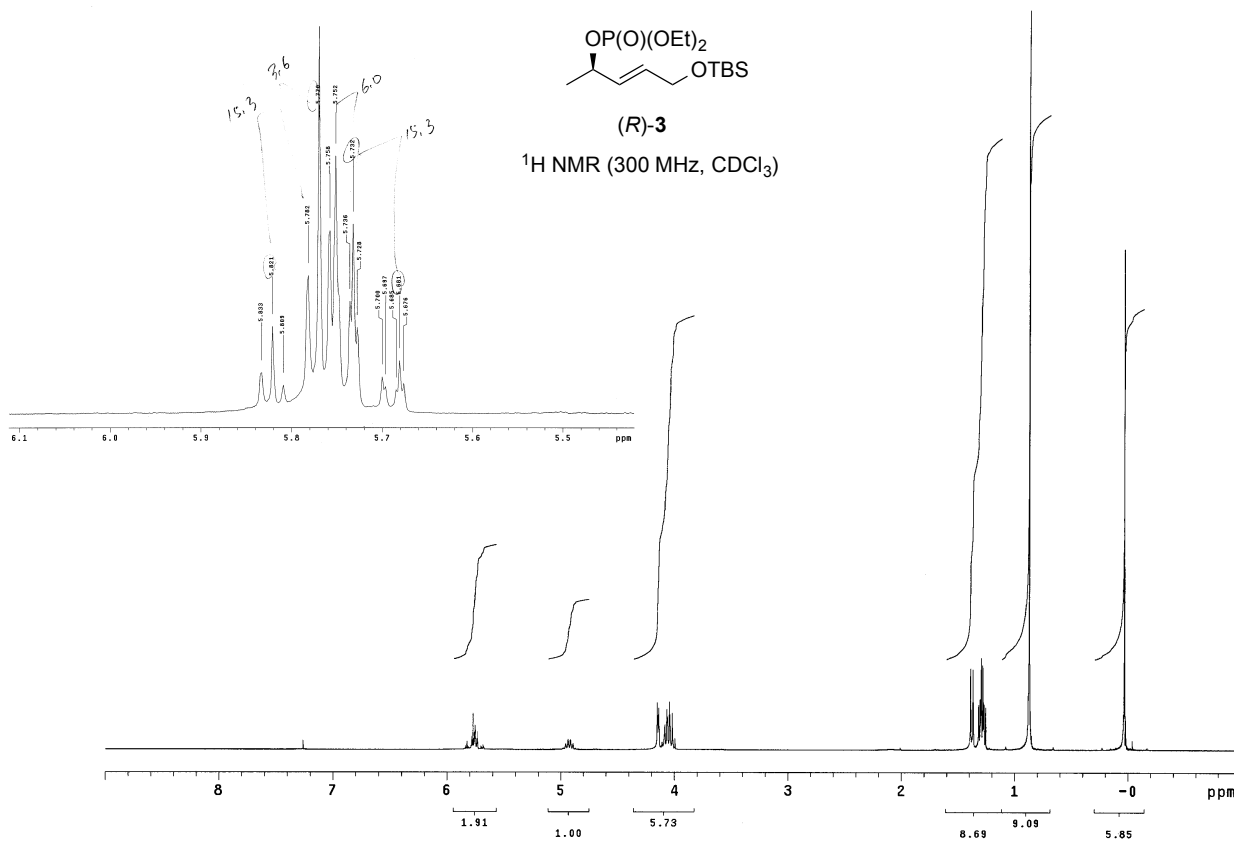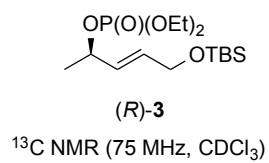



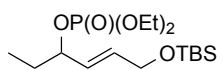

7

<sup>1</sup>H NMR (400 MHz, CDCl<sub>3</sub>)

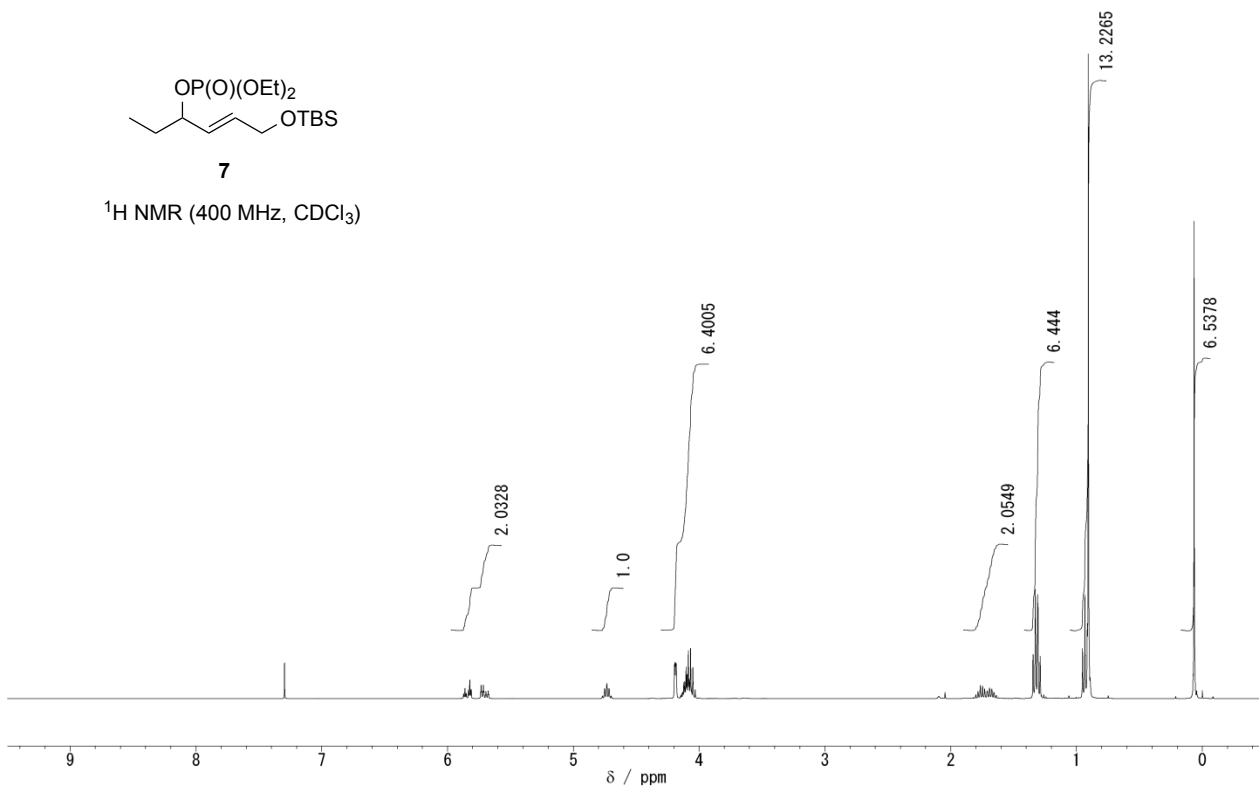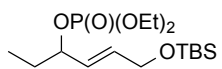

7

<sup>13</sup>C NMR (100 MHz, CDCl<sub>3</sub>)

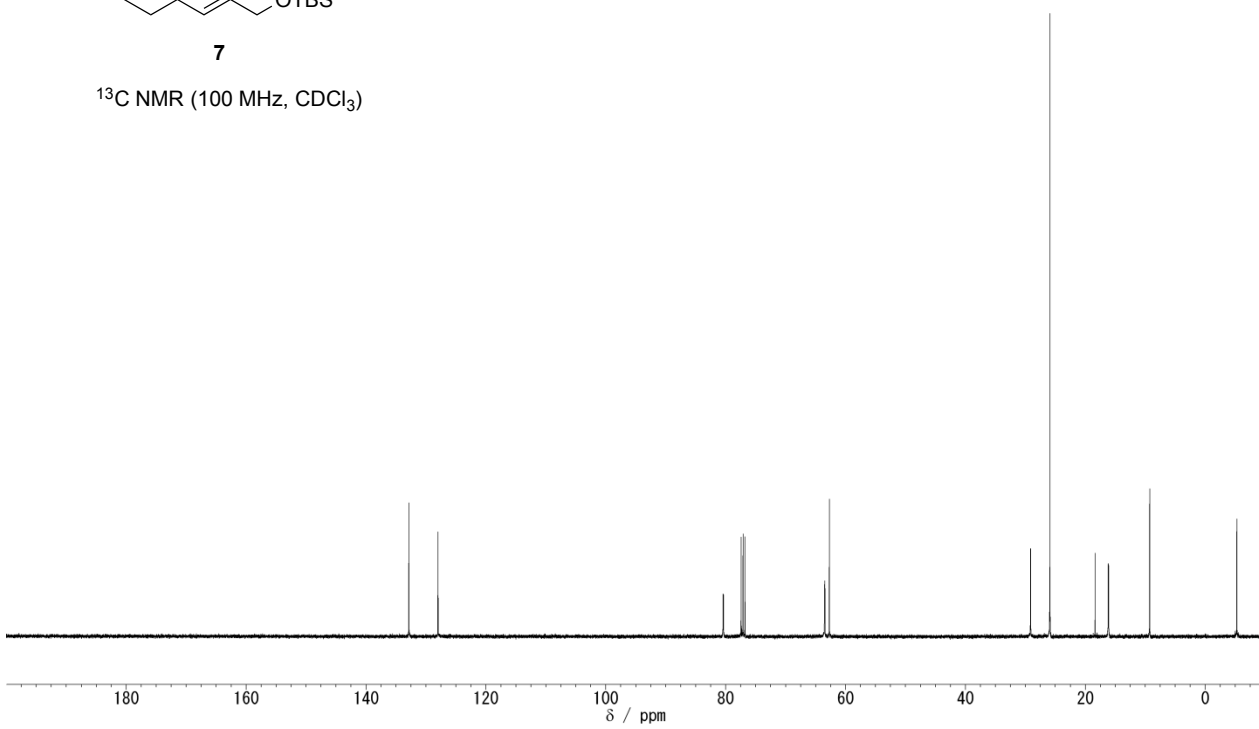

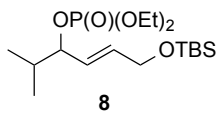

<sup>1</sup>H NMR (400 MHz, CDCl<sub>3</sub>)

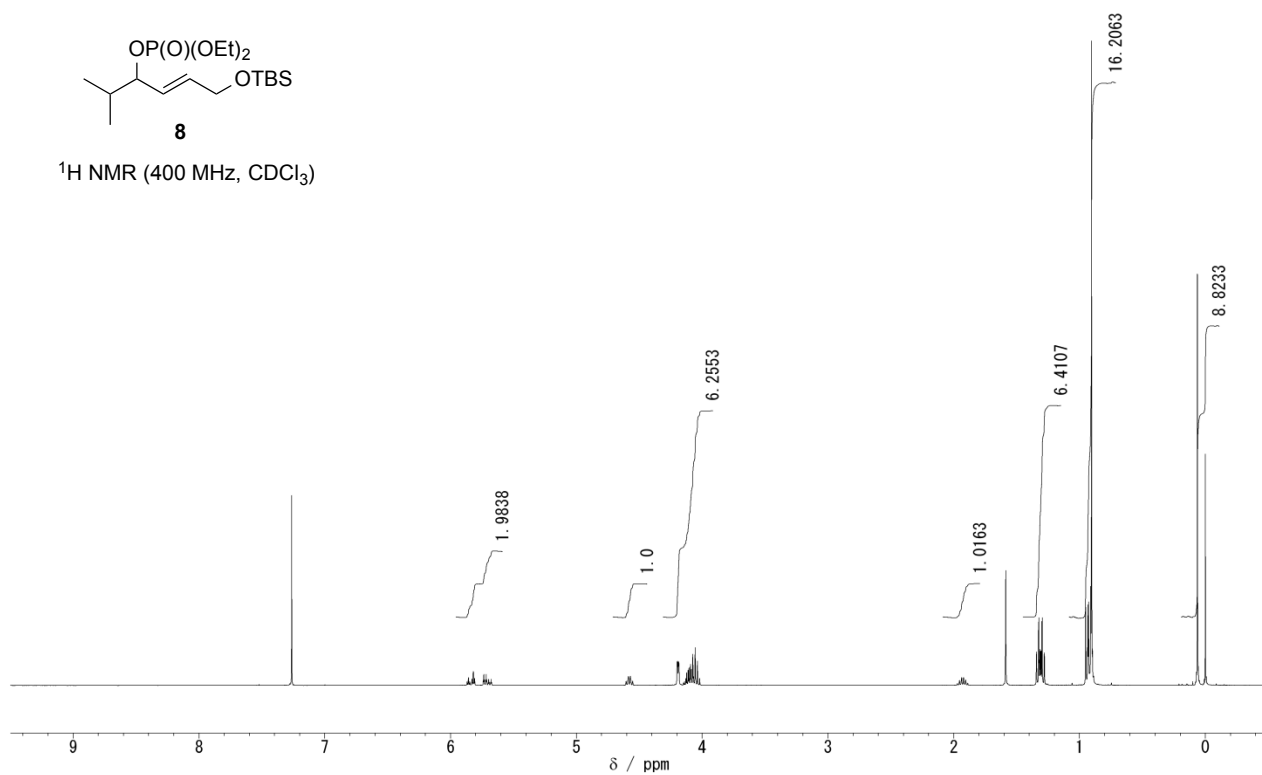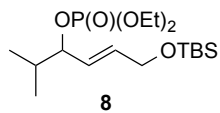

<sup>13</sup>C NMR (100 MHz, CDCl<sub>3</sub>)

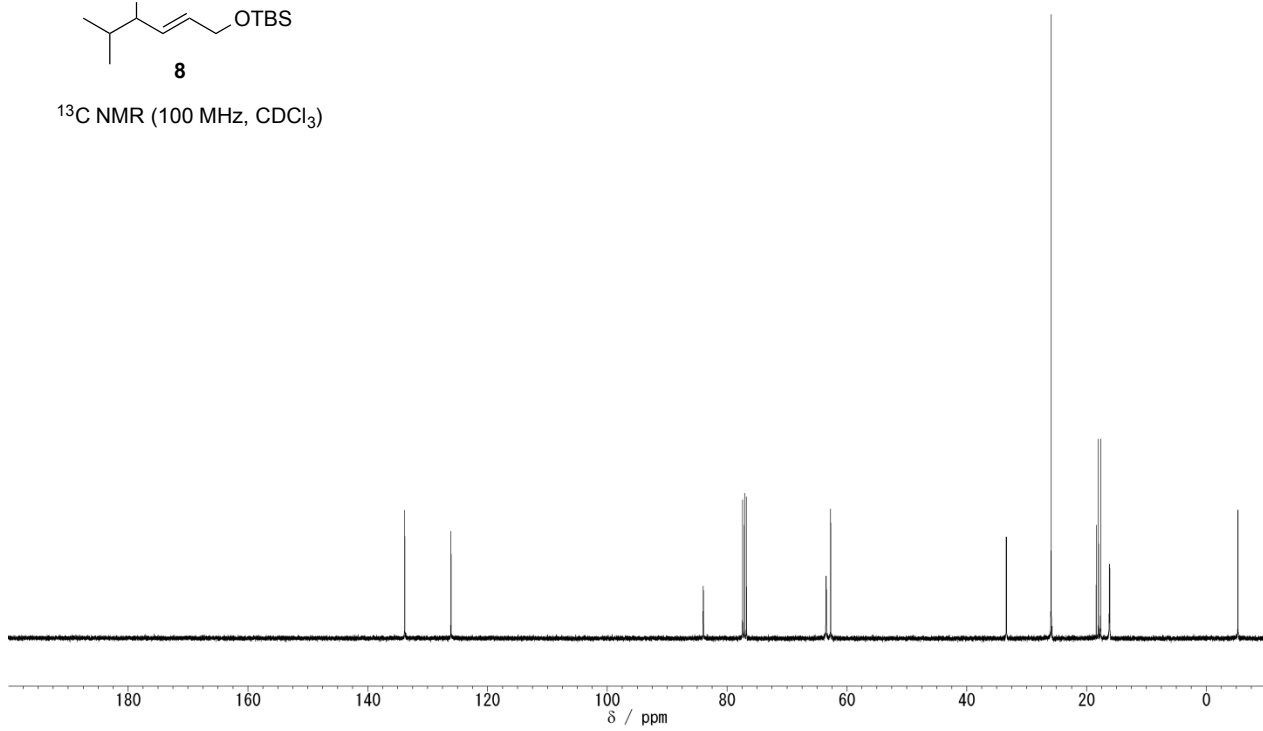

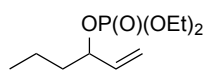

**9**

<sup>1</sup>H NMR (400 MHz, CDCl<sub>3</sub>)

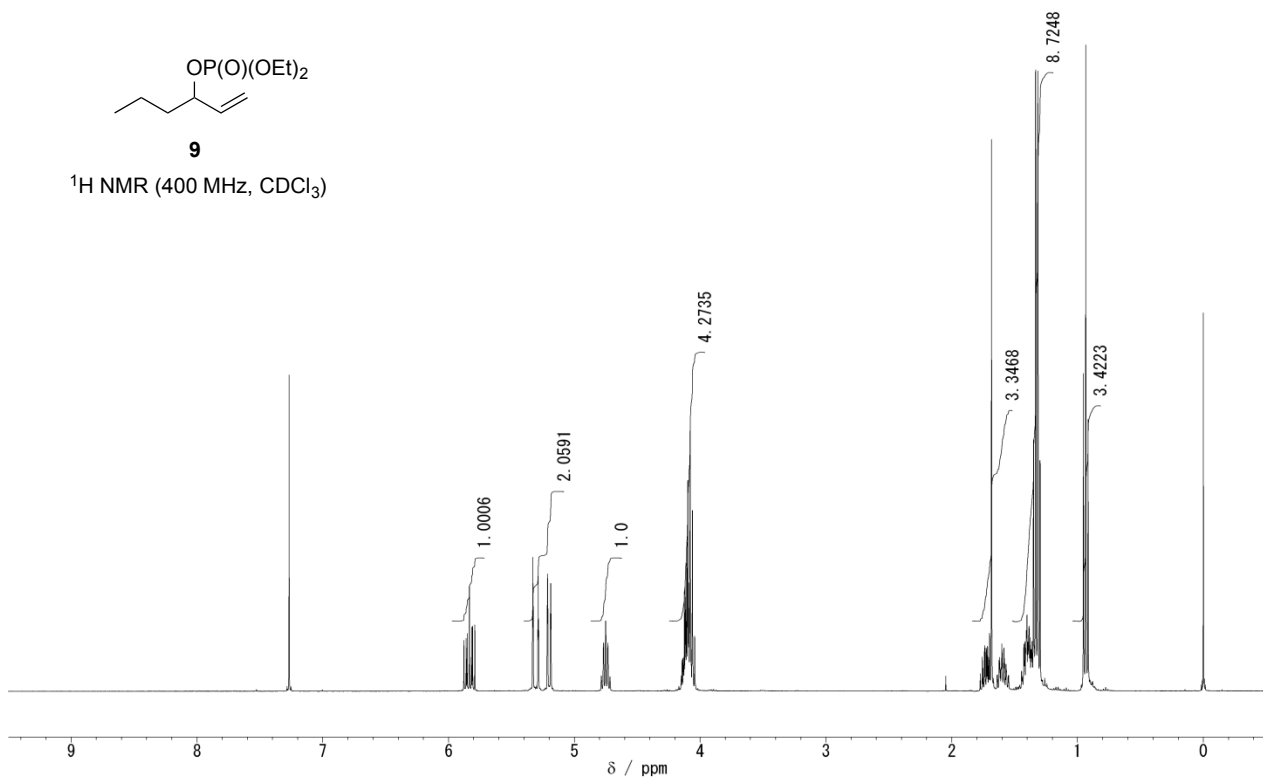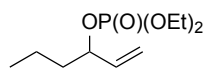

**9**

<sup>13</sup>C NMR (100 MHz, CDCl<sub>3</sub>)

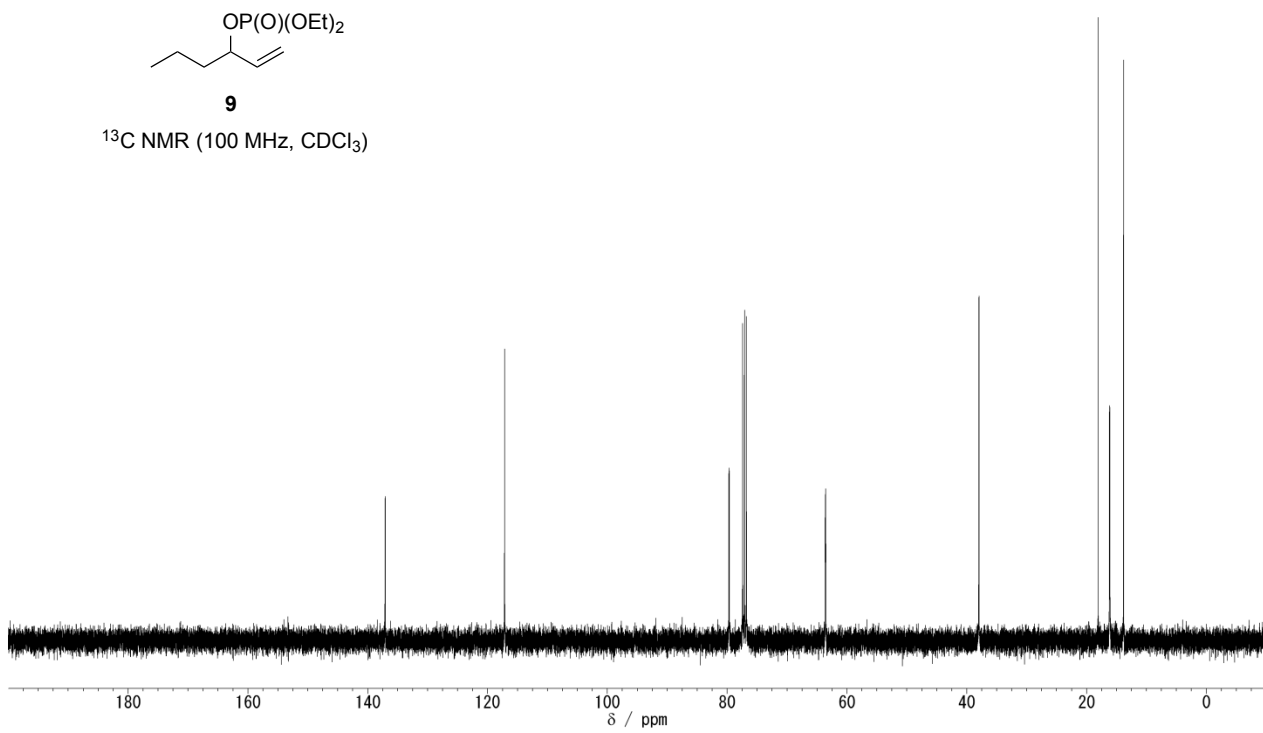

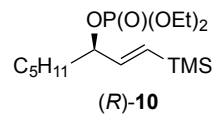

<sup>1</sup>H NMR (400 MHz, CDCl<sub>3</sub>)

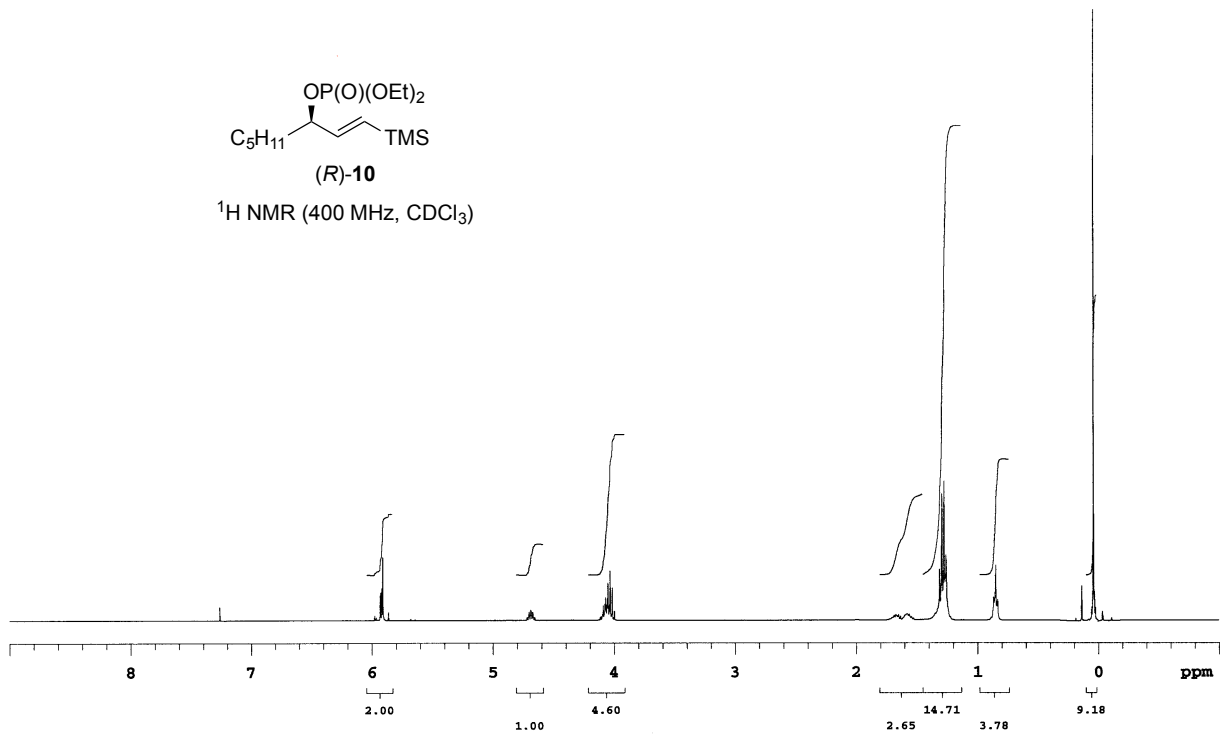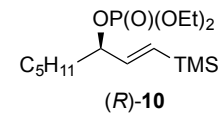

<sup>13</sup>C NMR (100 MHz, CDCl<sub>3</sub>)

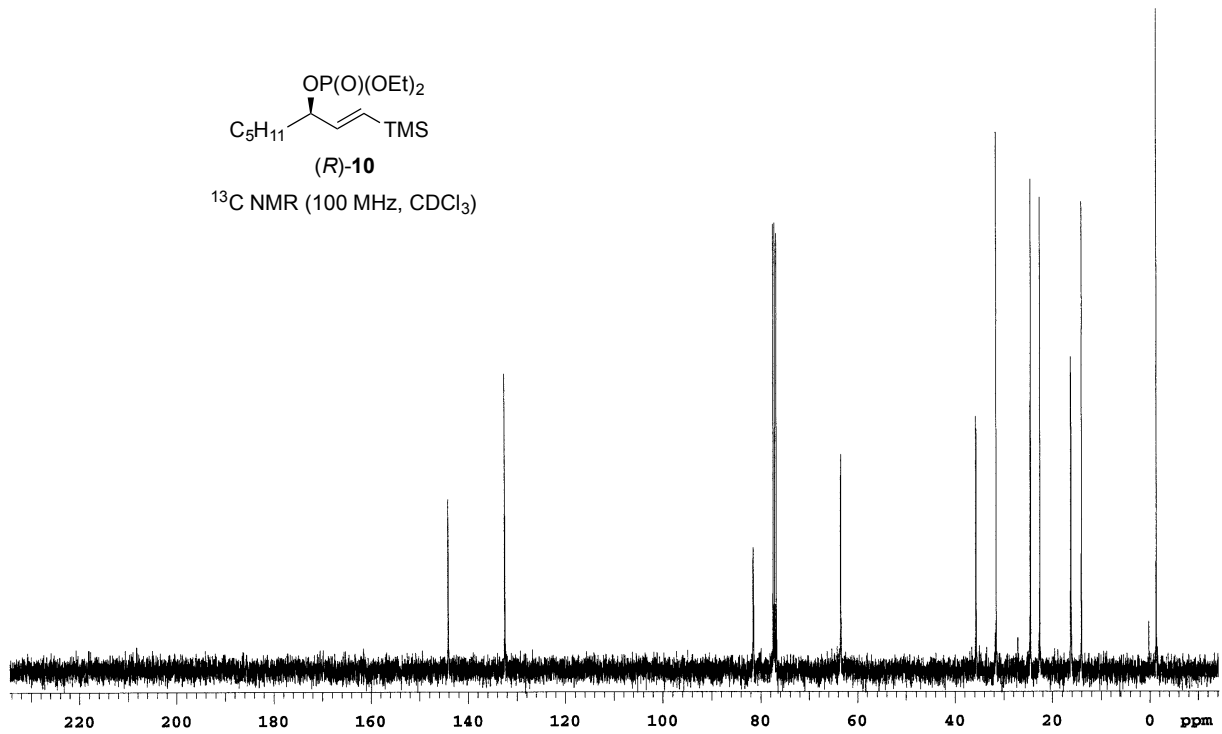

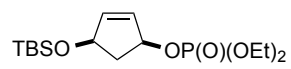

**11**

<sup>1</sup>H NMR (300 MHz, CDCl<sub>3</sub>)

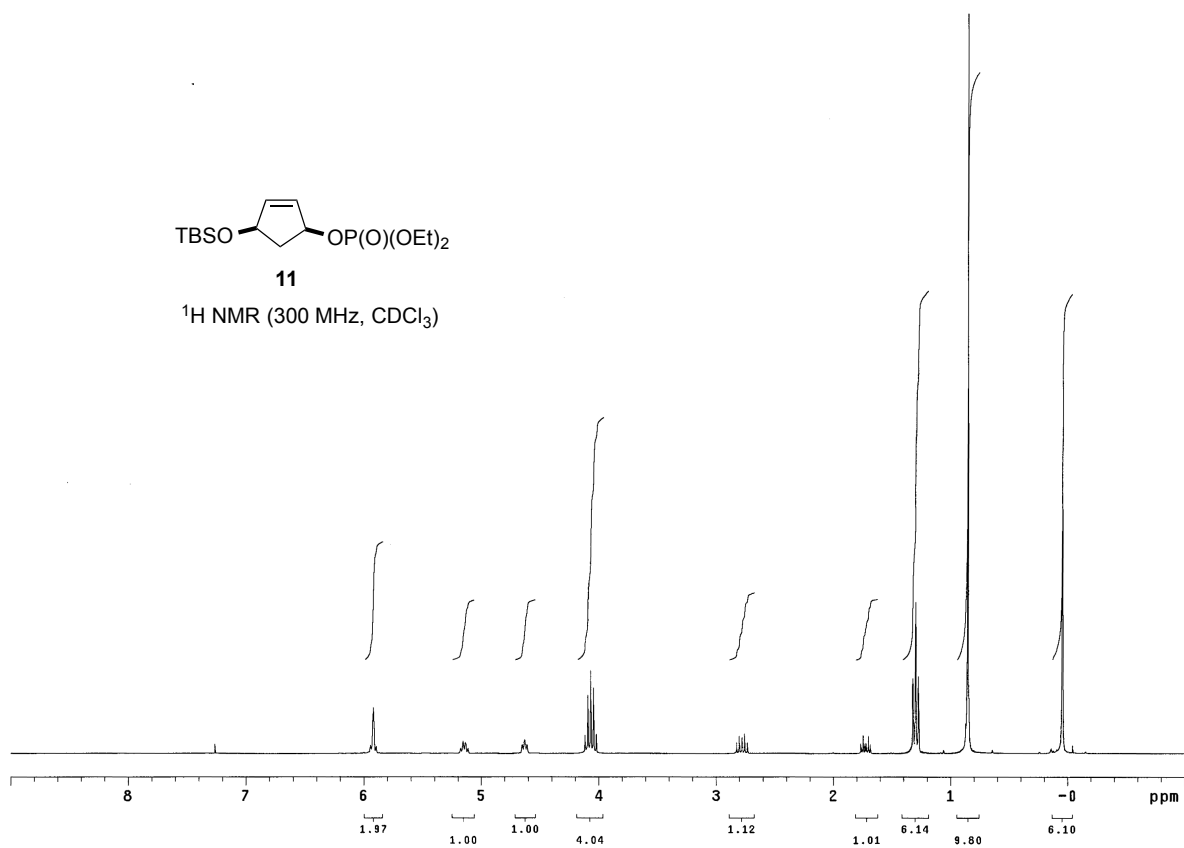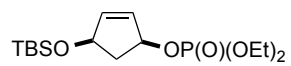

**11**

<sup>13</sup>C NMR (75 MHz, CDCl<sub>3</sub>)

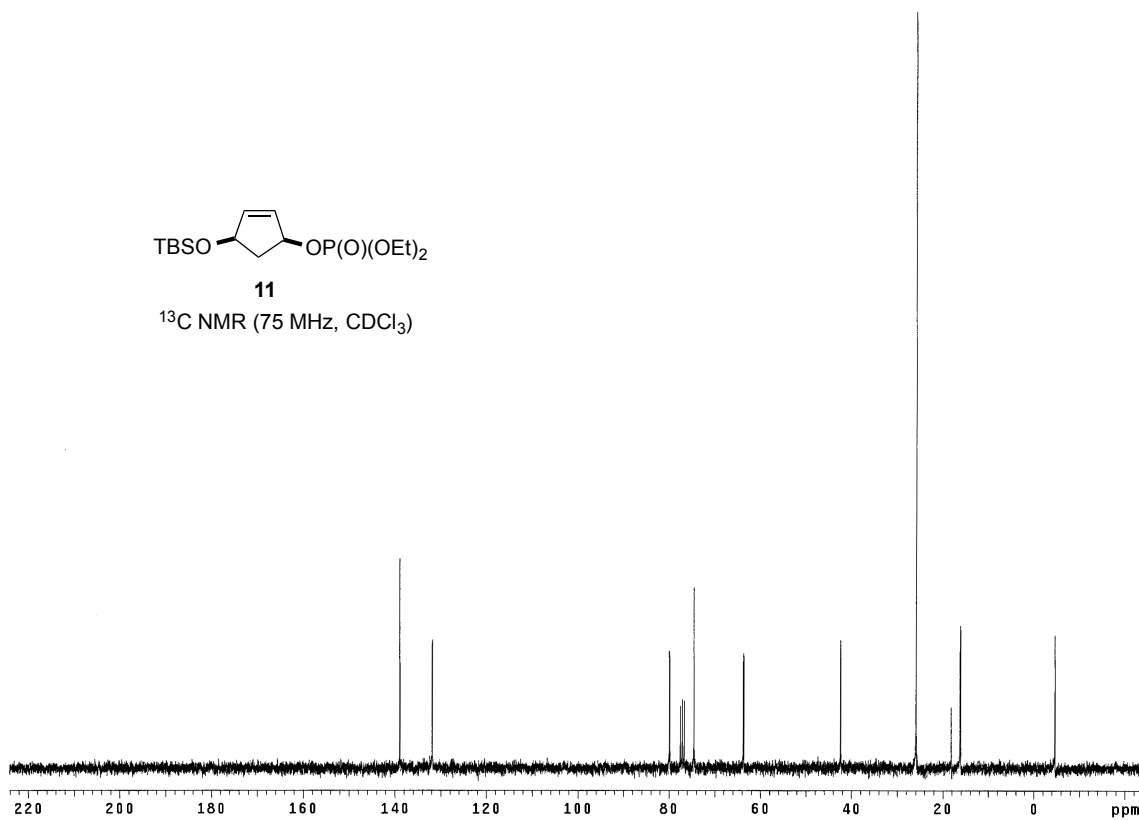

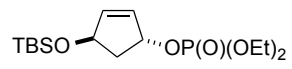

**12**

<sup>1</sup>H NMR (300 MHz, CDCl<sub>3</sub>)

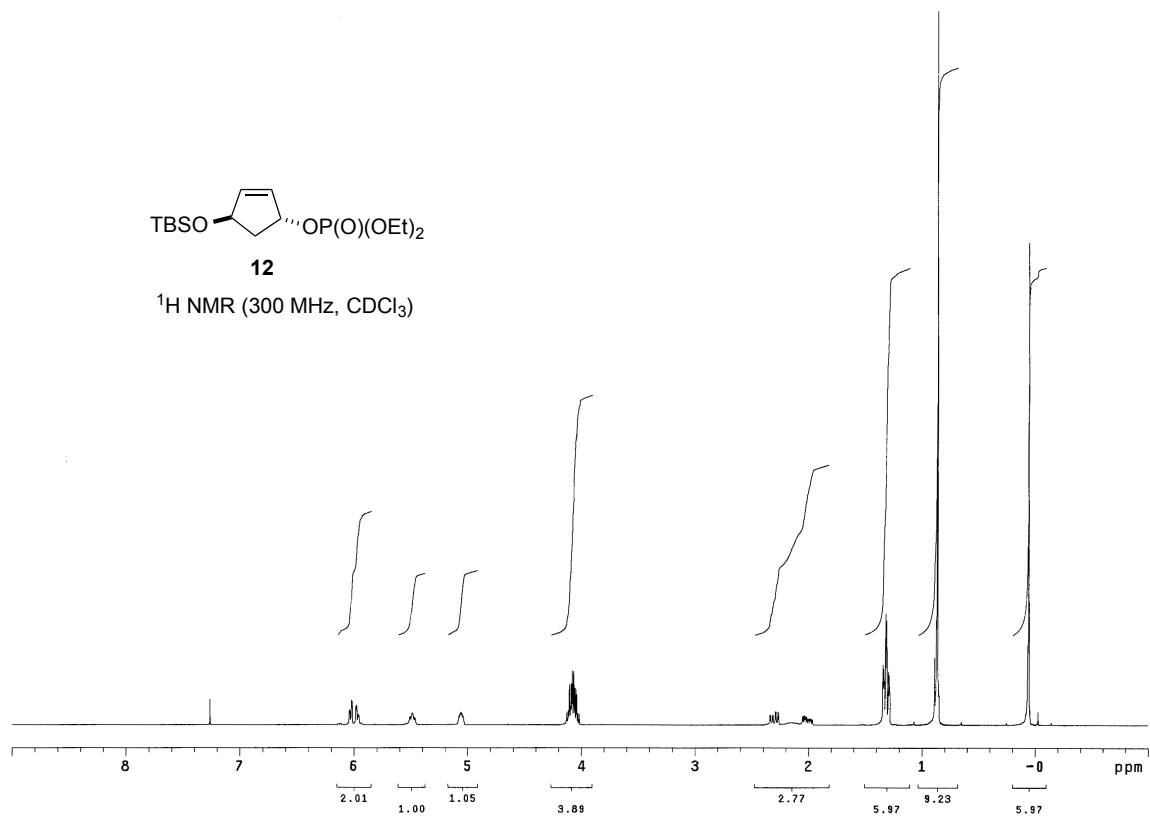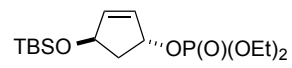

**12**

<sup>13</sup>C NMR (75 MHz, CDCl<sub>3</sub>)

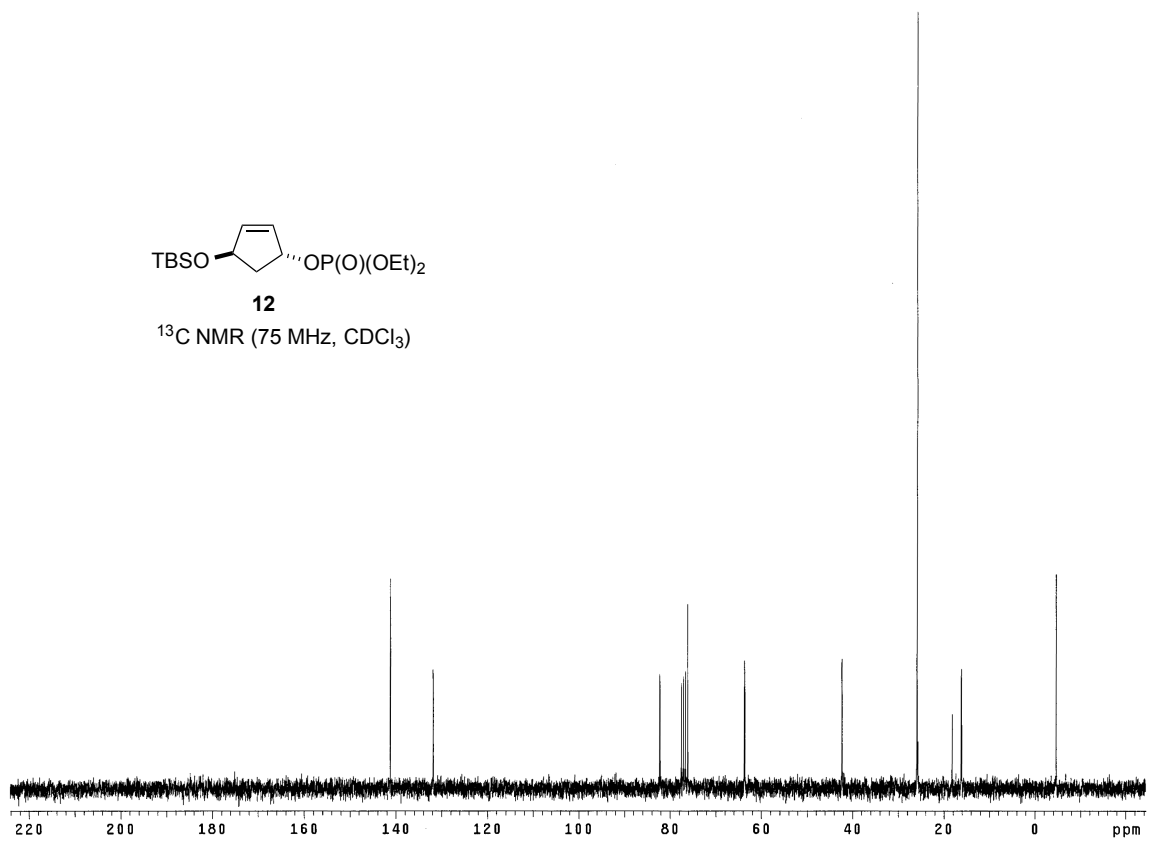

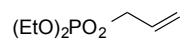

**13**

$^1\text{H}$  NMR (300 MHz,  $\text{CDCl}_3$ )

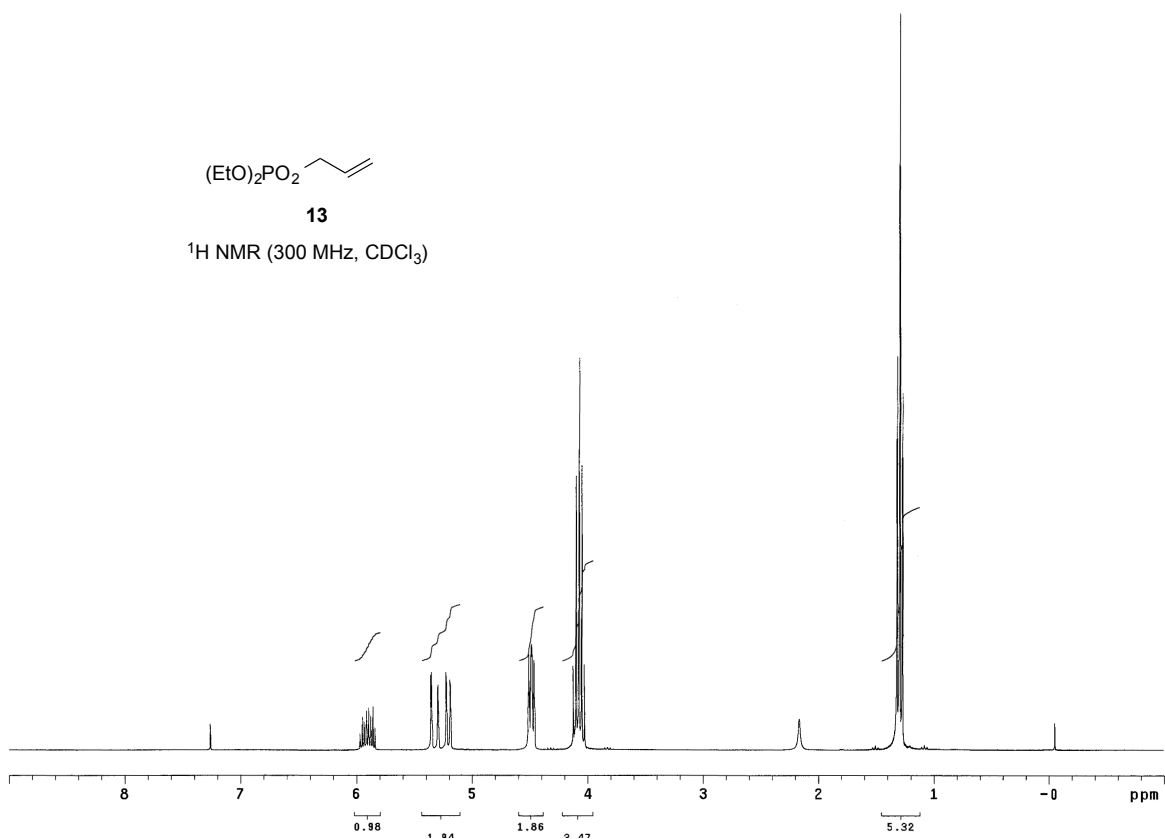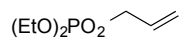

**13**

$^{13}\text{C}$  NMR (75 MHz,  $\text{CDCl}_3$ )

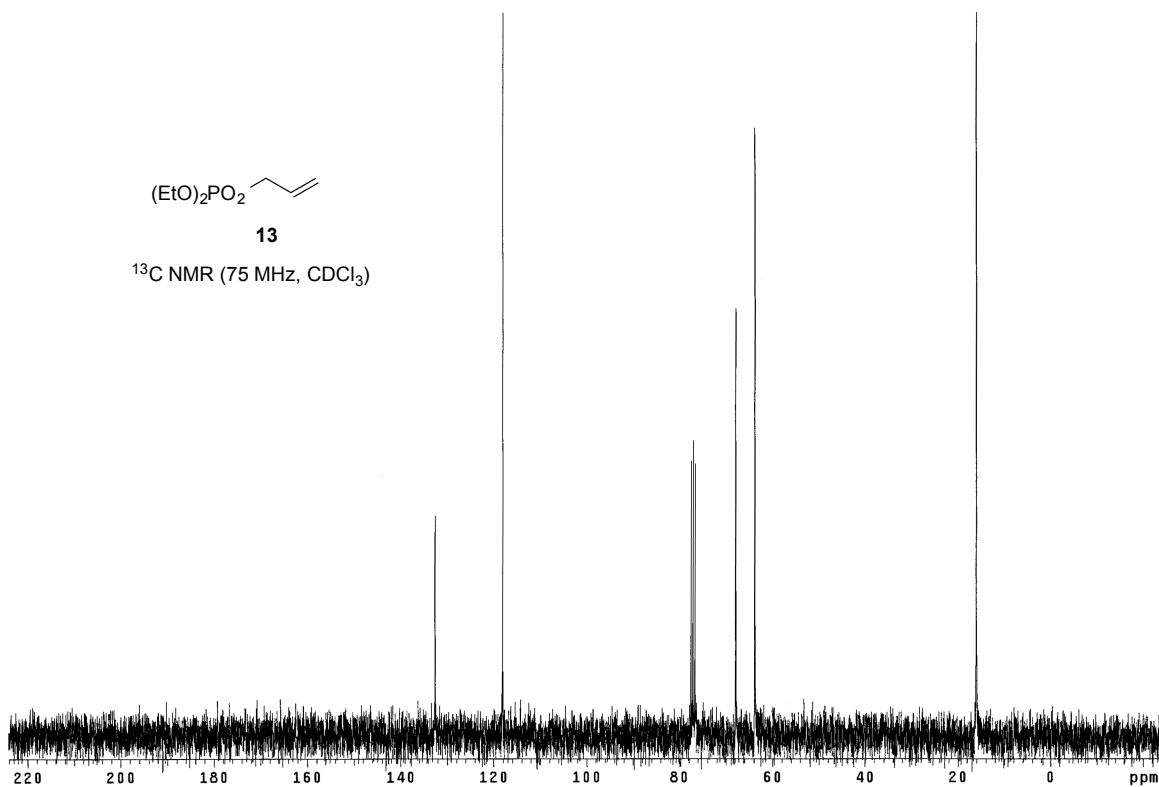

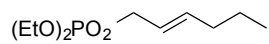

**14**

<sup>1</sup>H NMR (400 MHz, CDCl<sub>3</sub>)

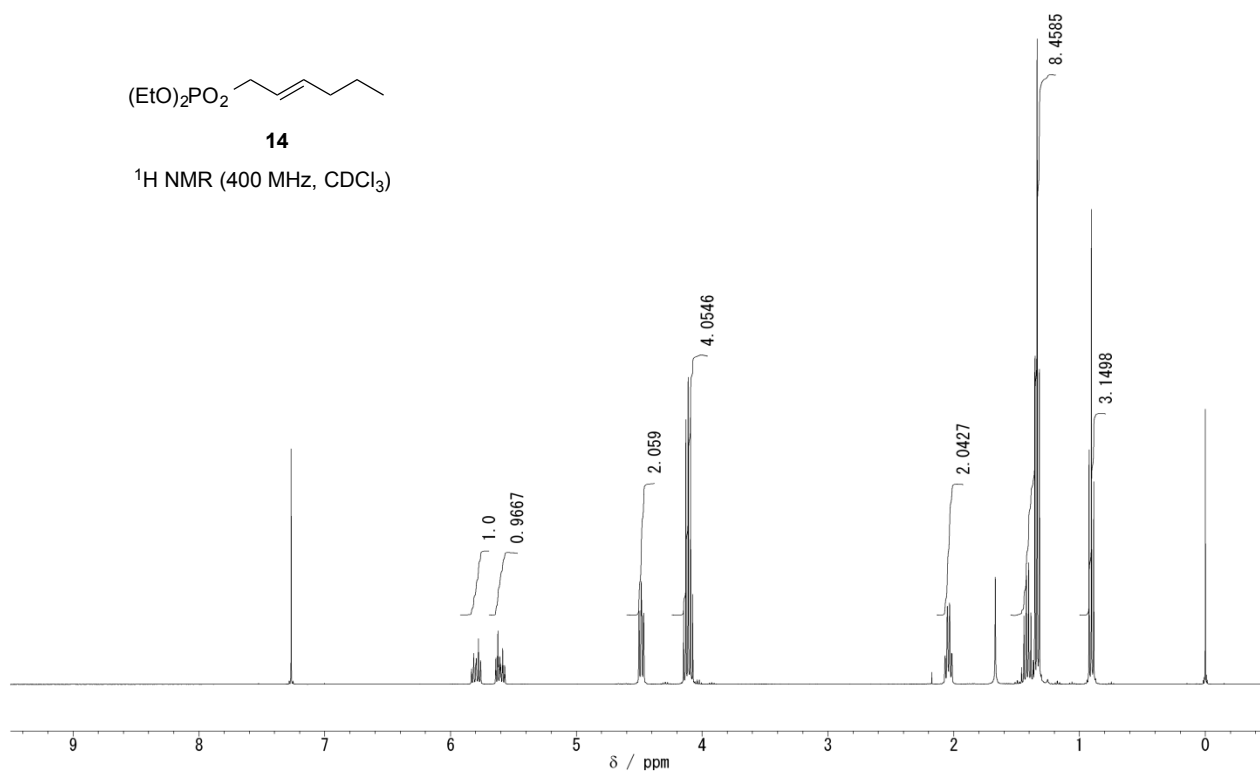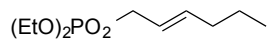

**14**

<sup>13</sup>C NMR (100 MHz, CDCl<sub>3</sub>)

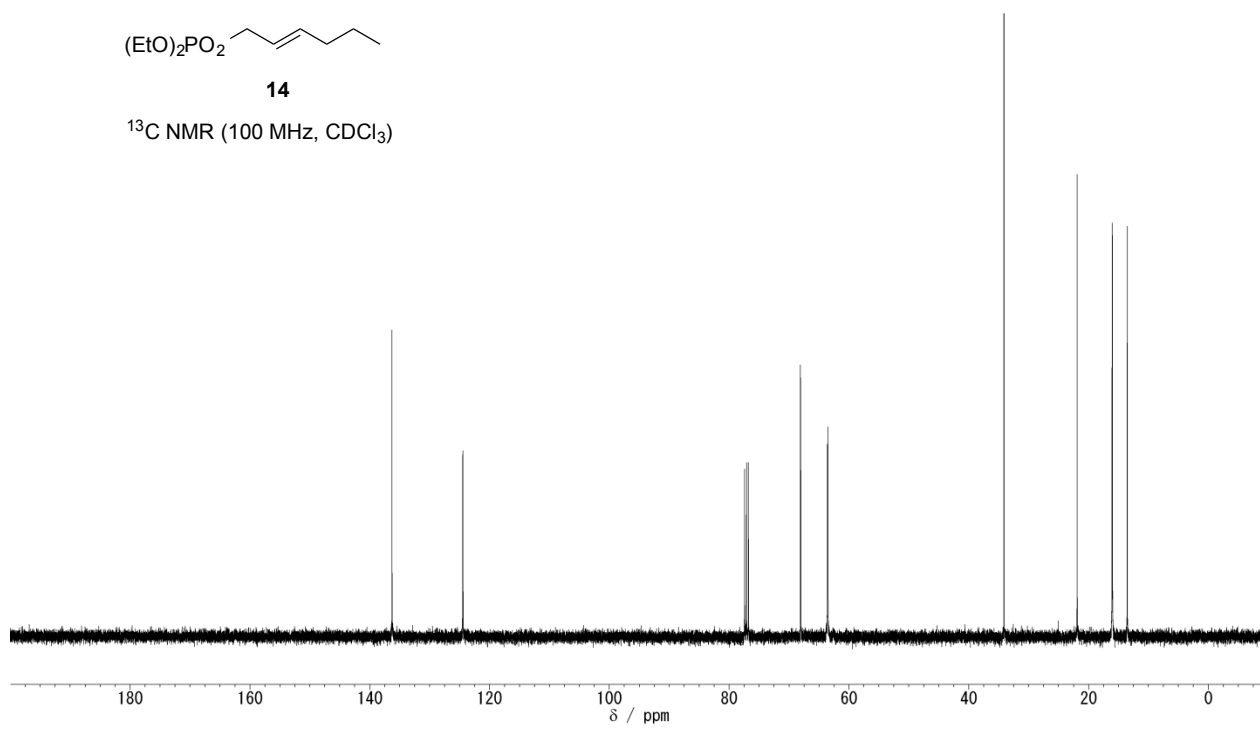



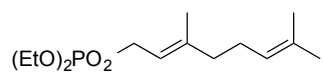

**15**

<sup>1</sup>H NMR (300 MHz, CDCl<sub>3</sub>)

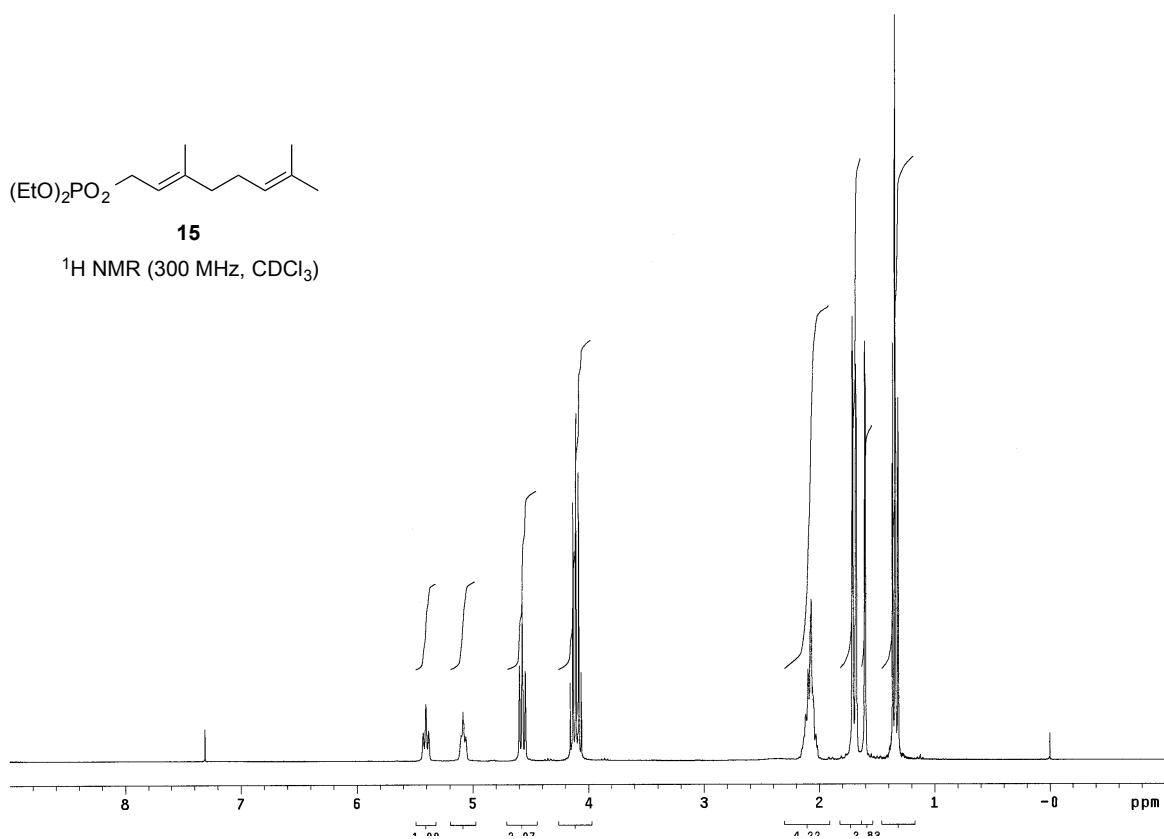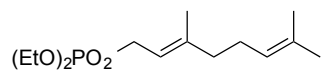

**15**

<sup>13</sup>C NMR (75 MHz, CDCl<sub>3</sub>)

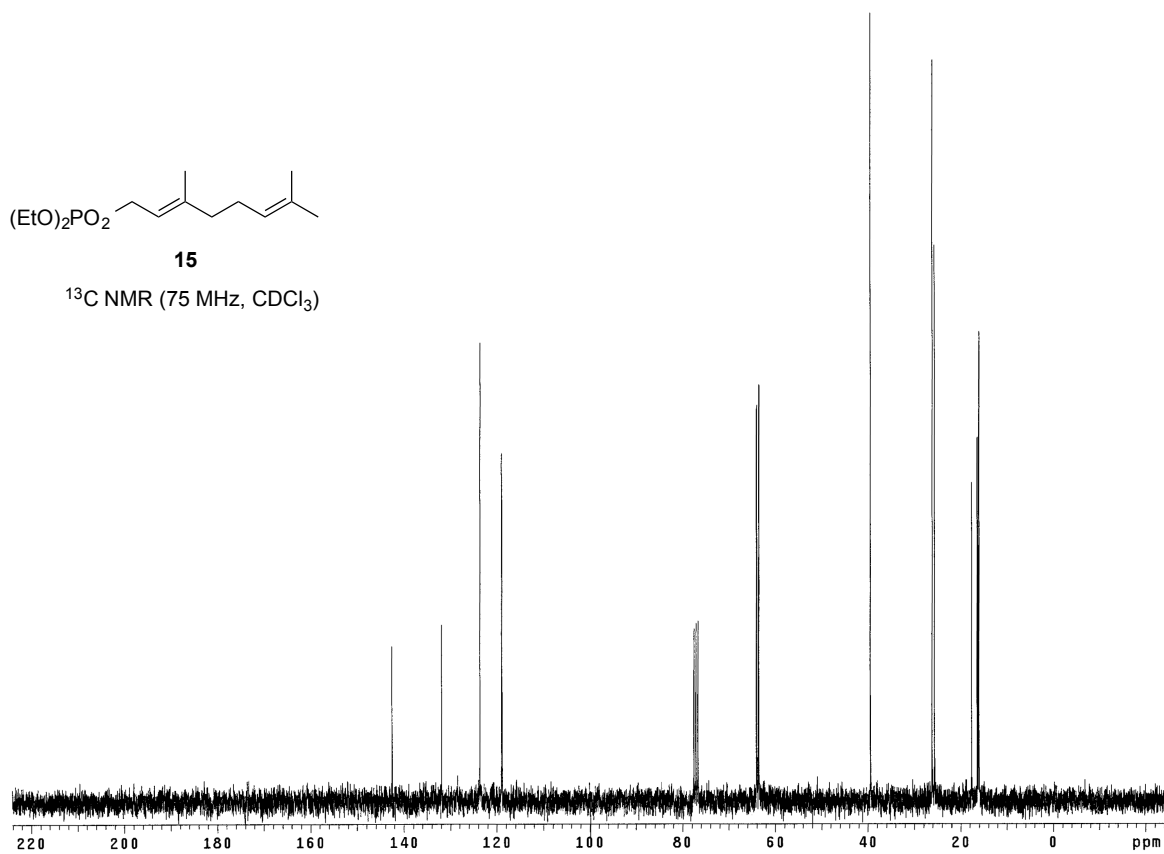

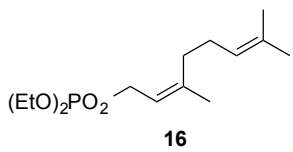

<sup>1</sup>H NMR (300 MHz, CDCl<sub>3</sub>)

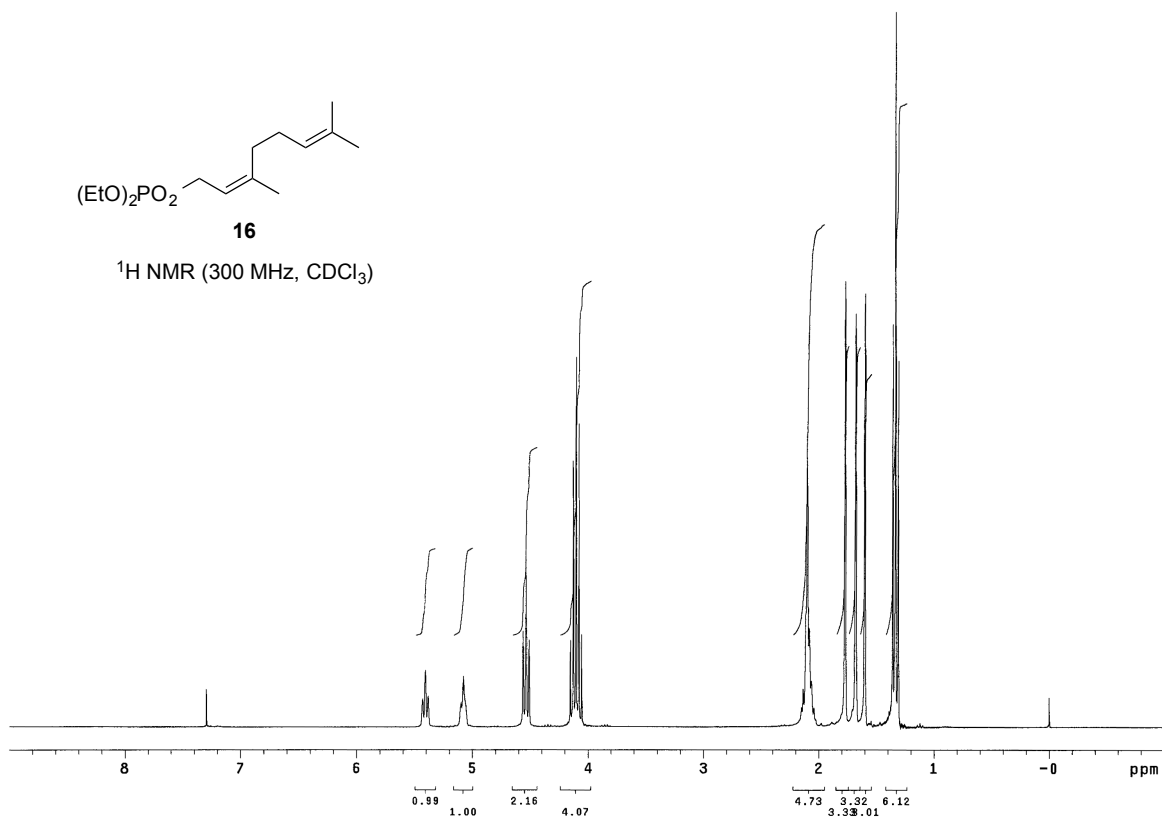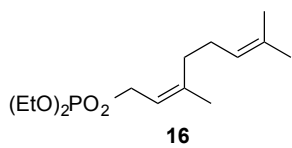

<sup>13</sup>C NMR (75 MHz, CDCl<sub>3</sub>)

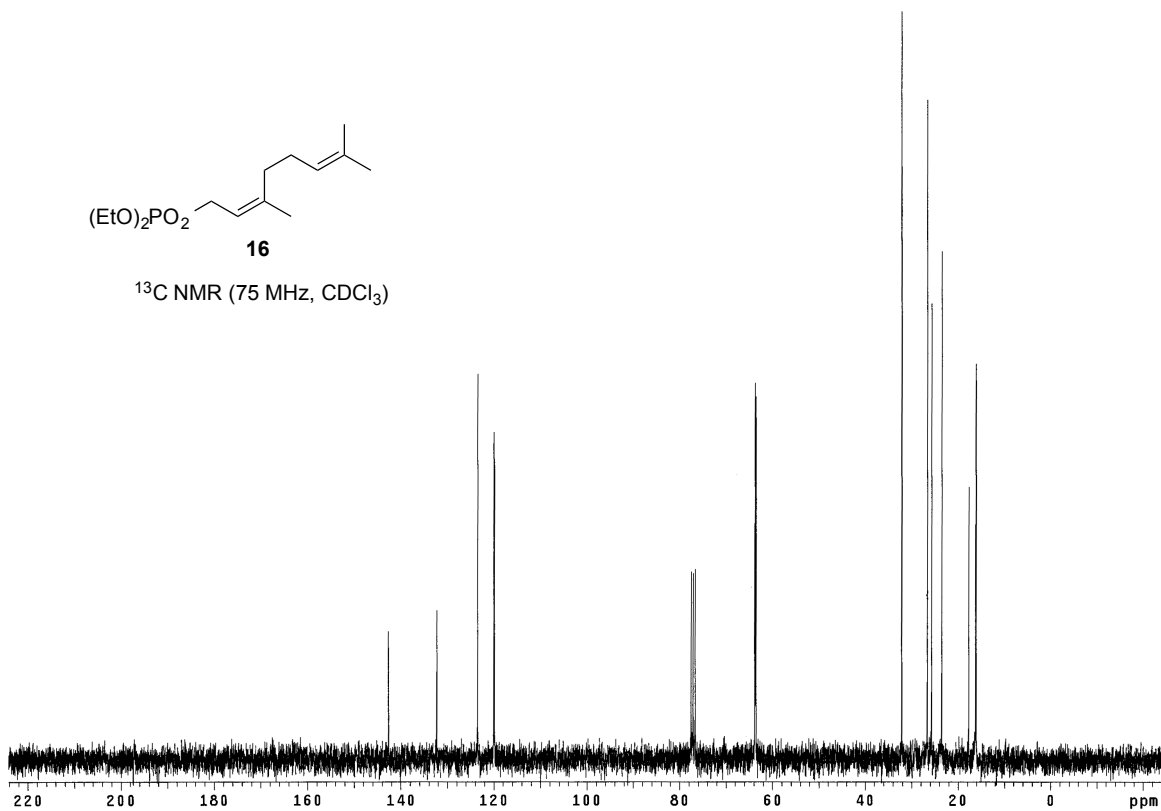

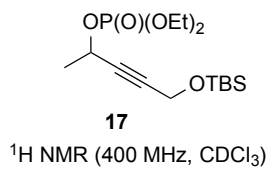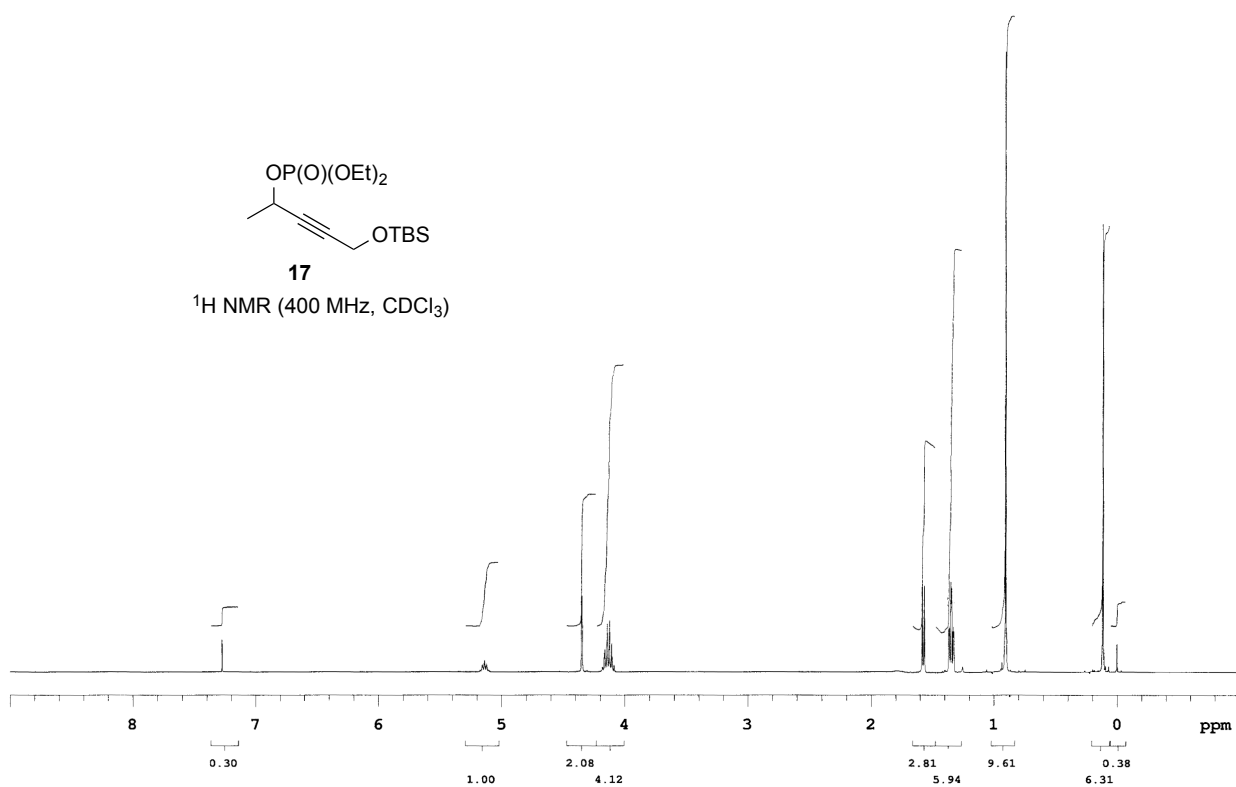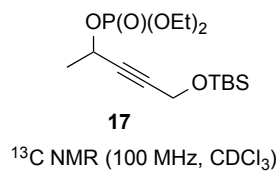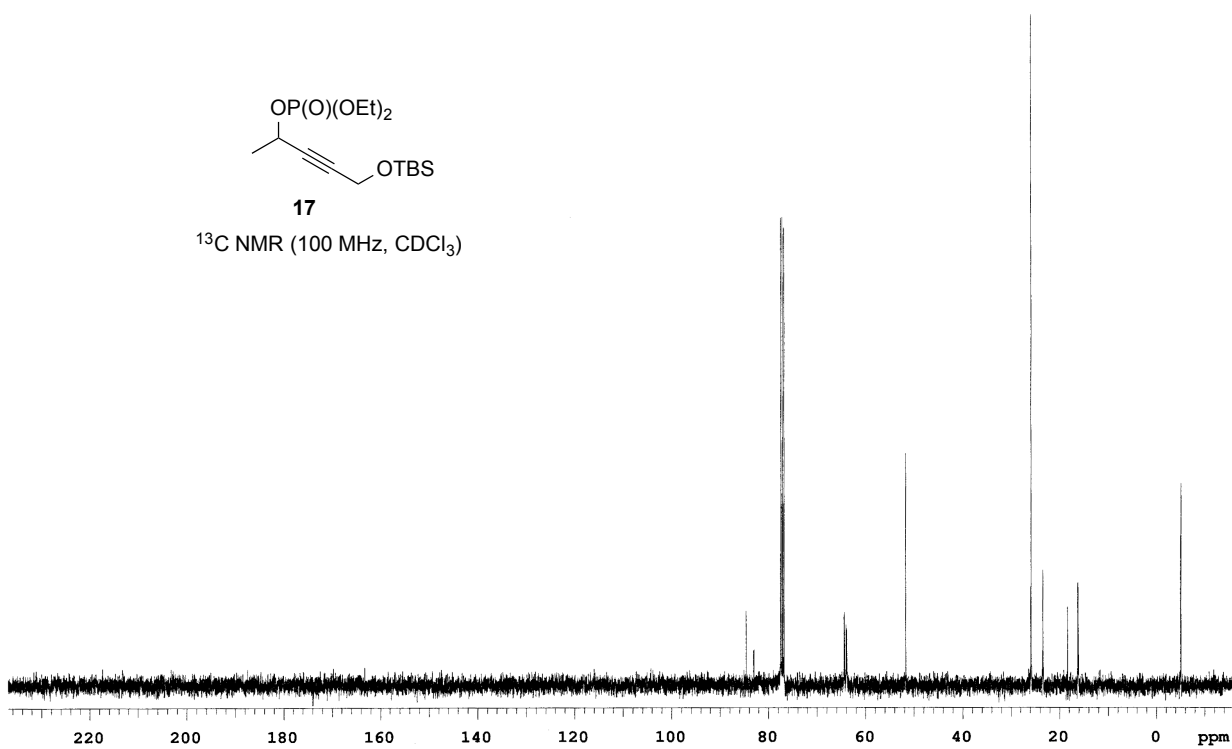

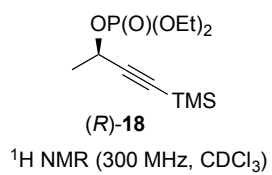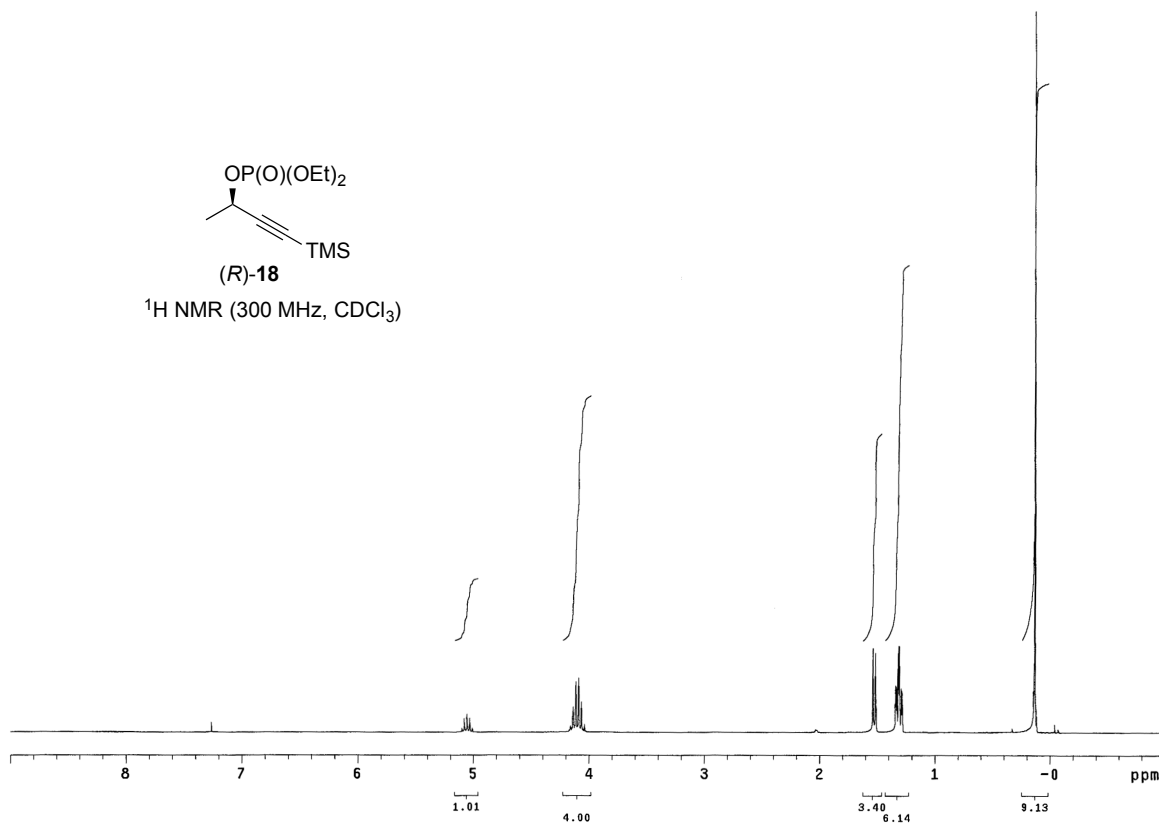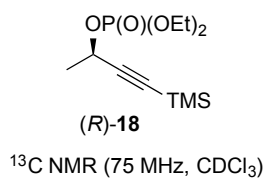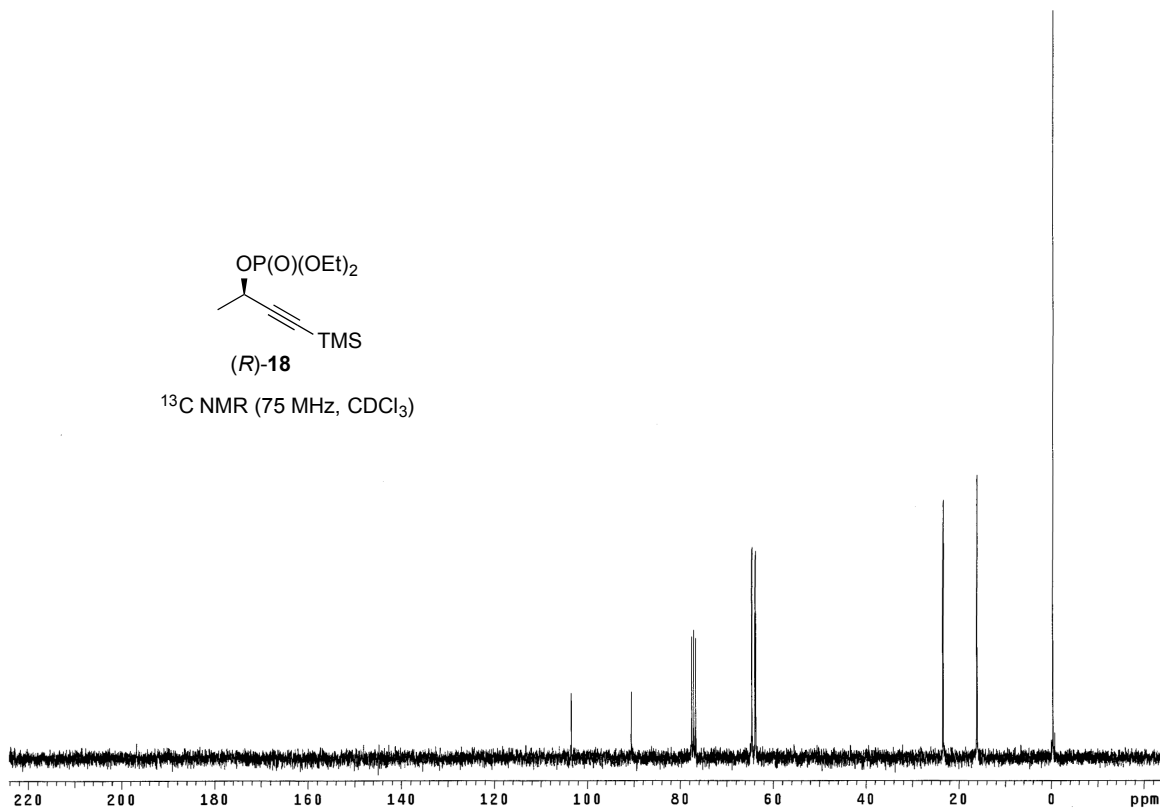

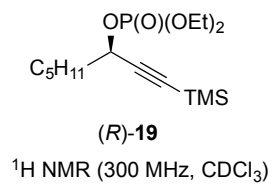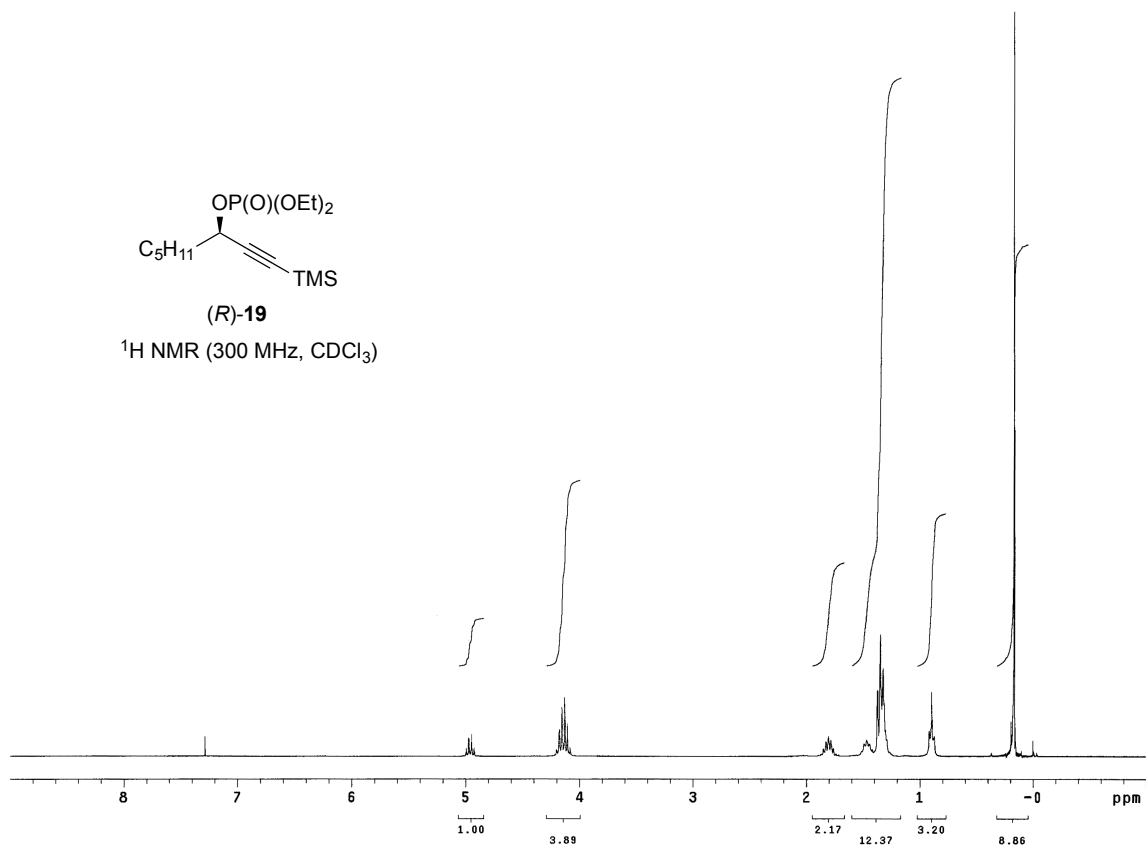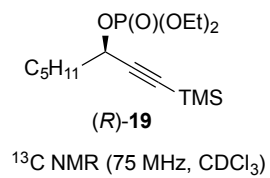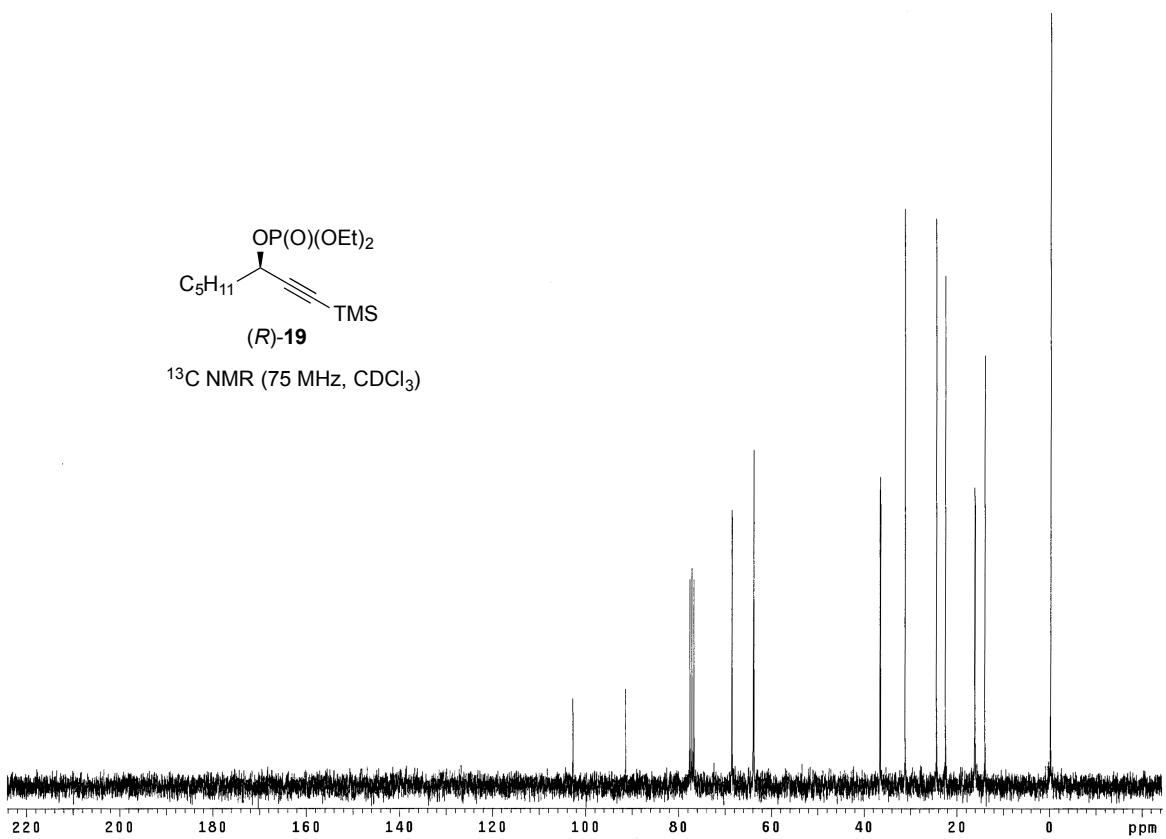

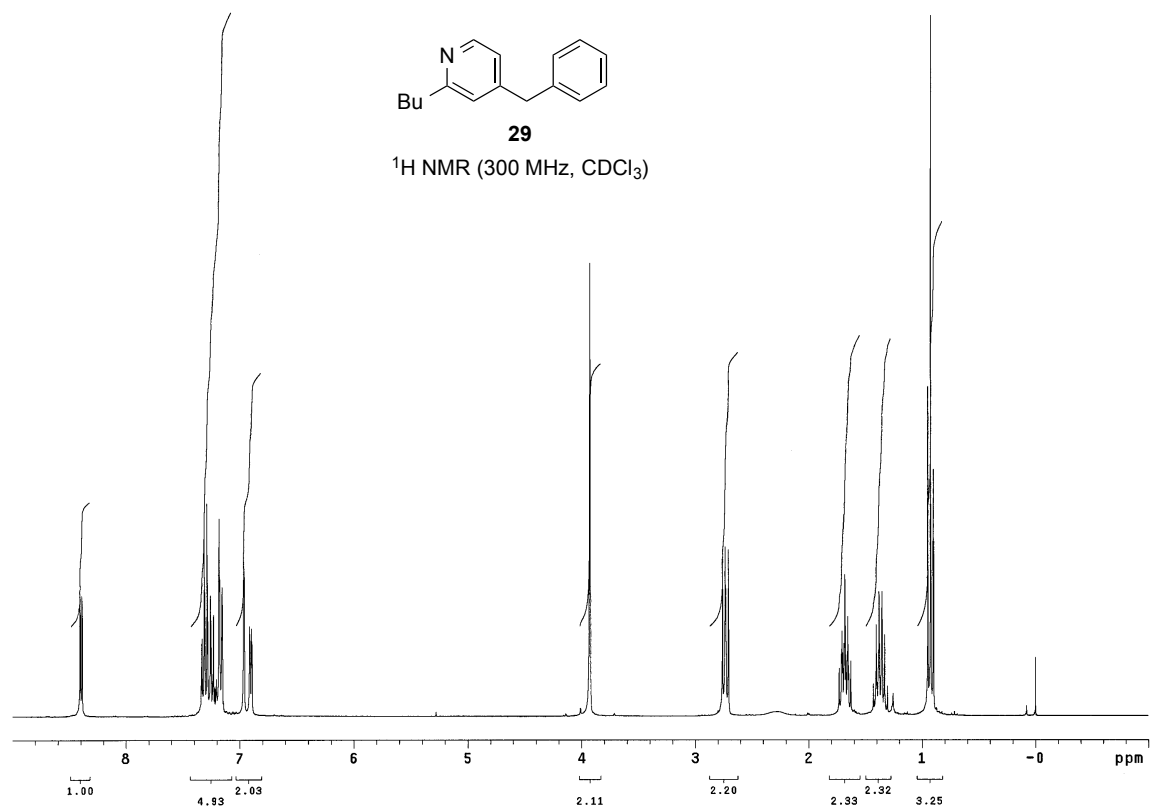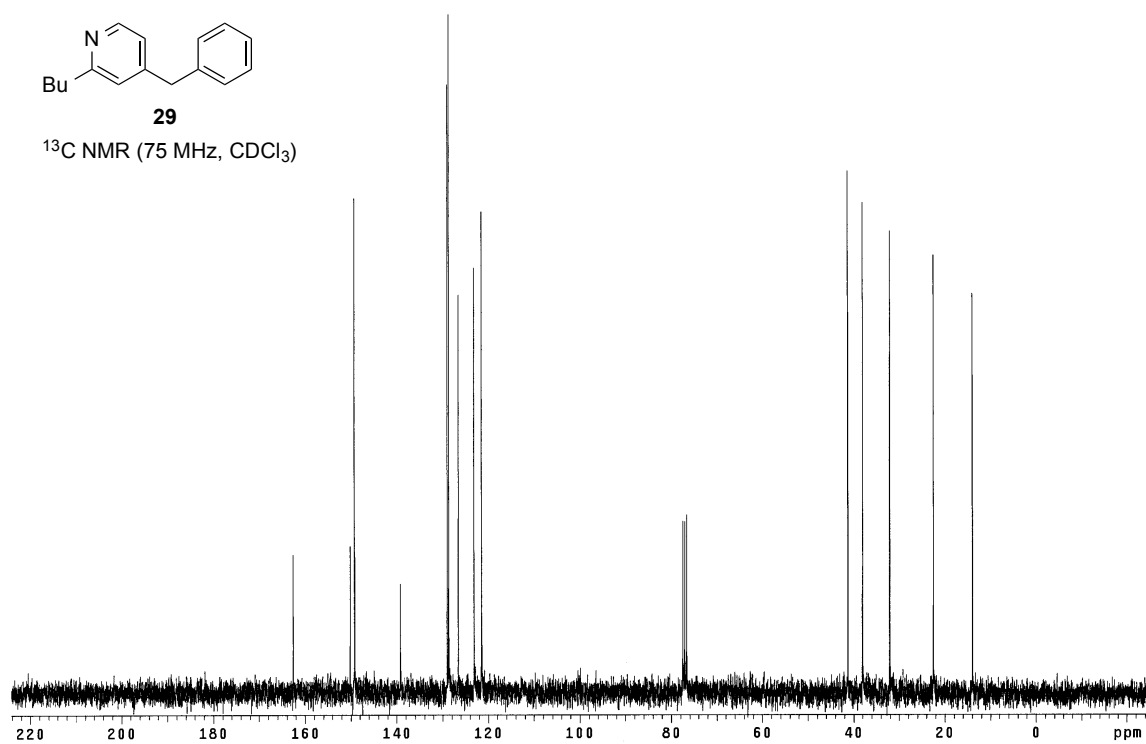

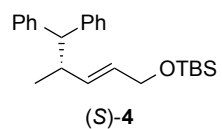

<sup>1</sup>H NMR (400 MHz, CDCl<sub>3</sub>)

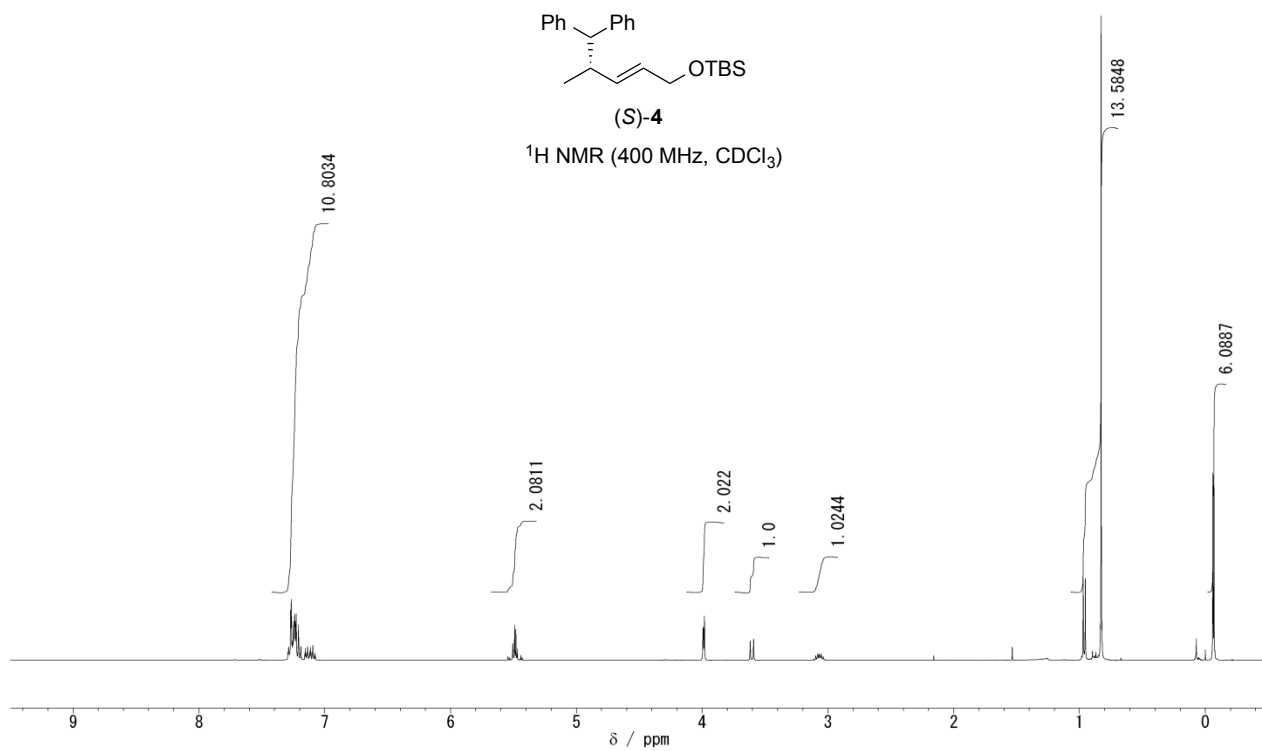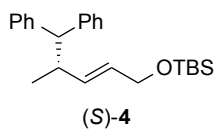

<sup>13</sup>C NMR (100 MHz, CDCl<sub>3</sub>)

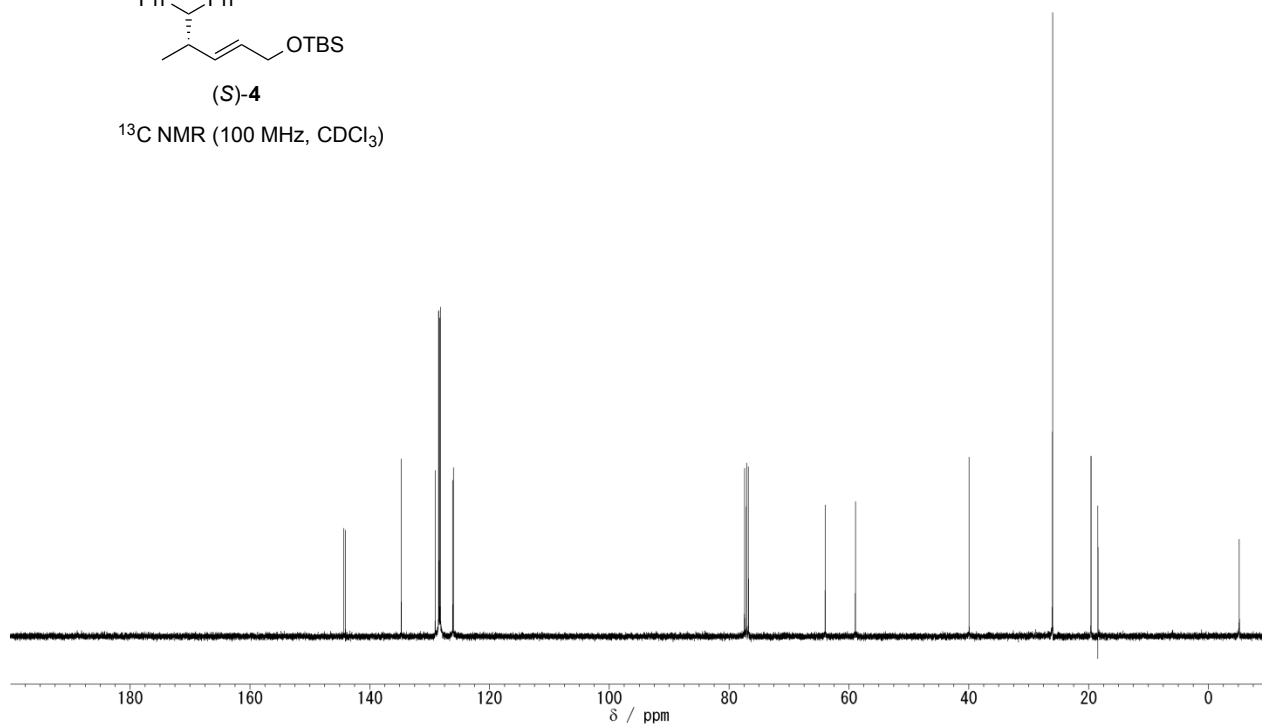

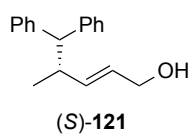

<sup>1</sup>H NMR (300 MHz, CDCl<sub>3</sub>)

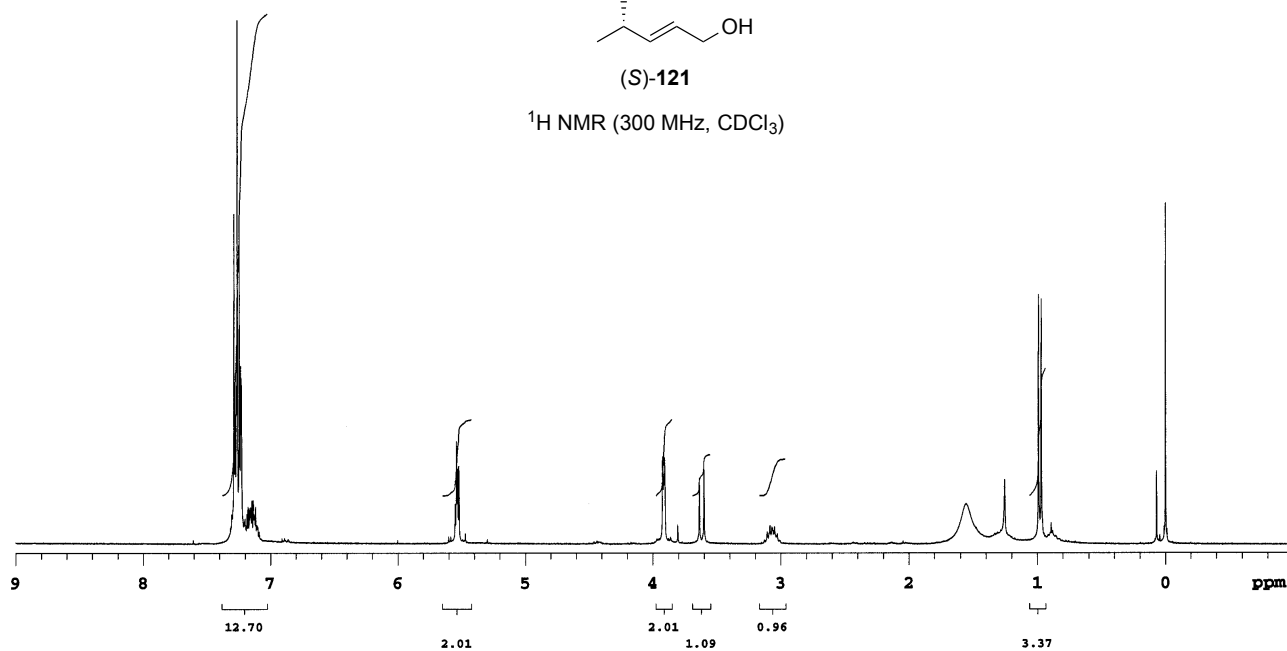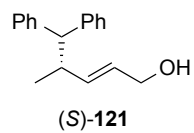

<sup>13</sup>C NMR (75 MHz, CDCl<sub>3</sub>)

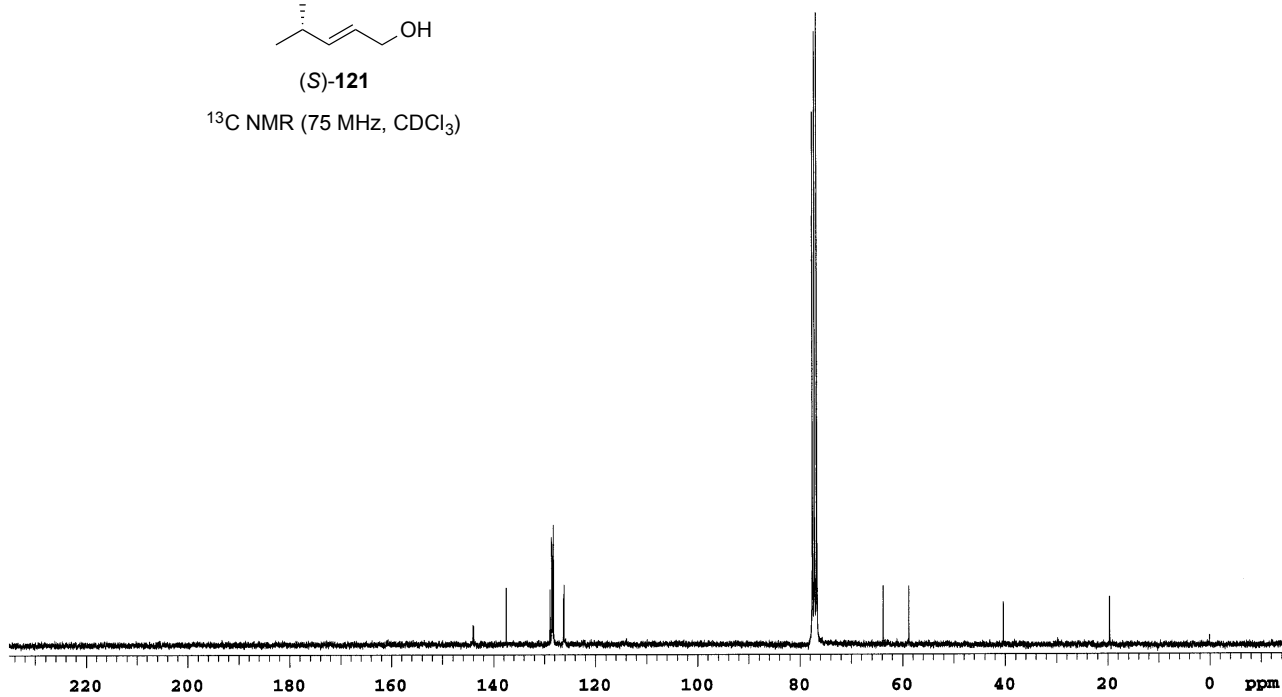



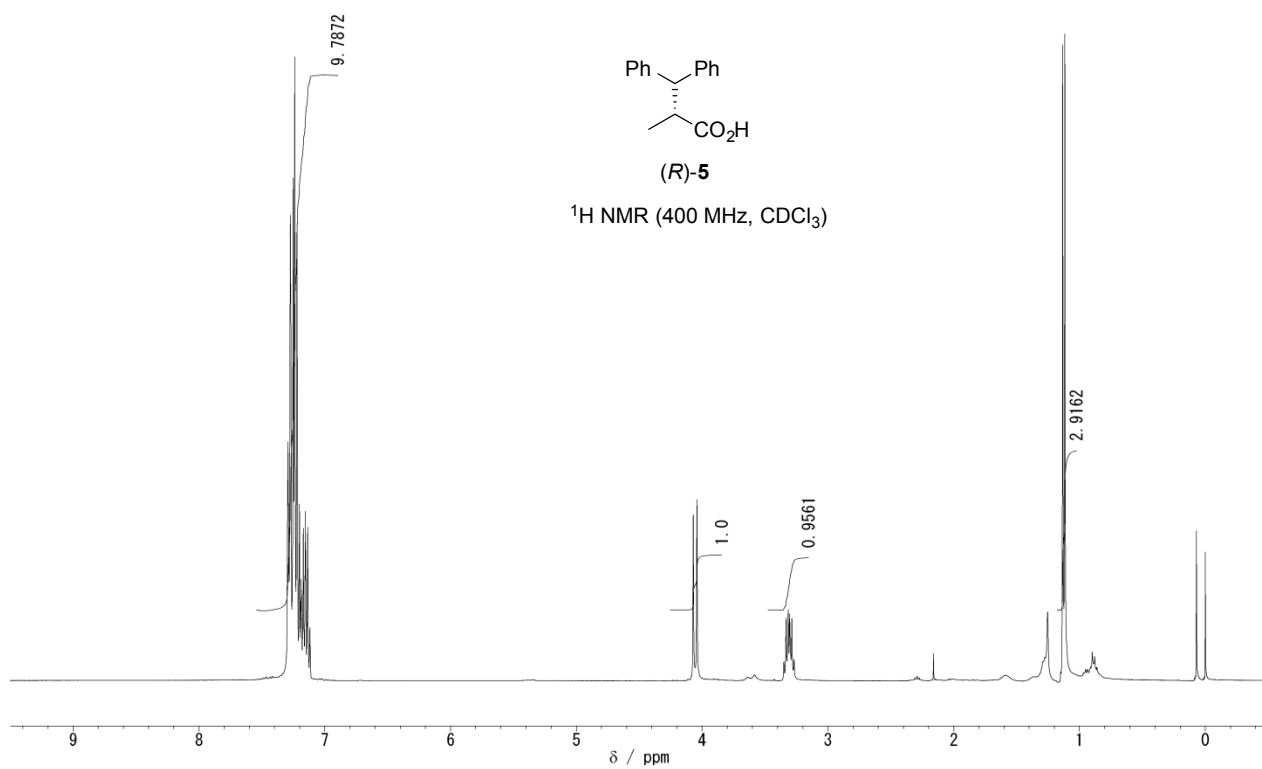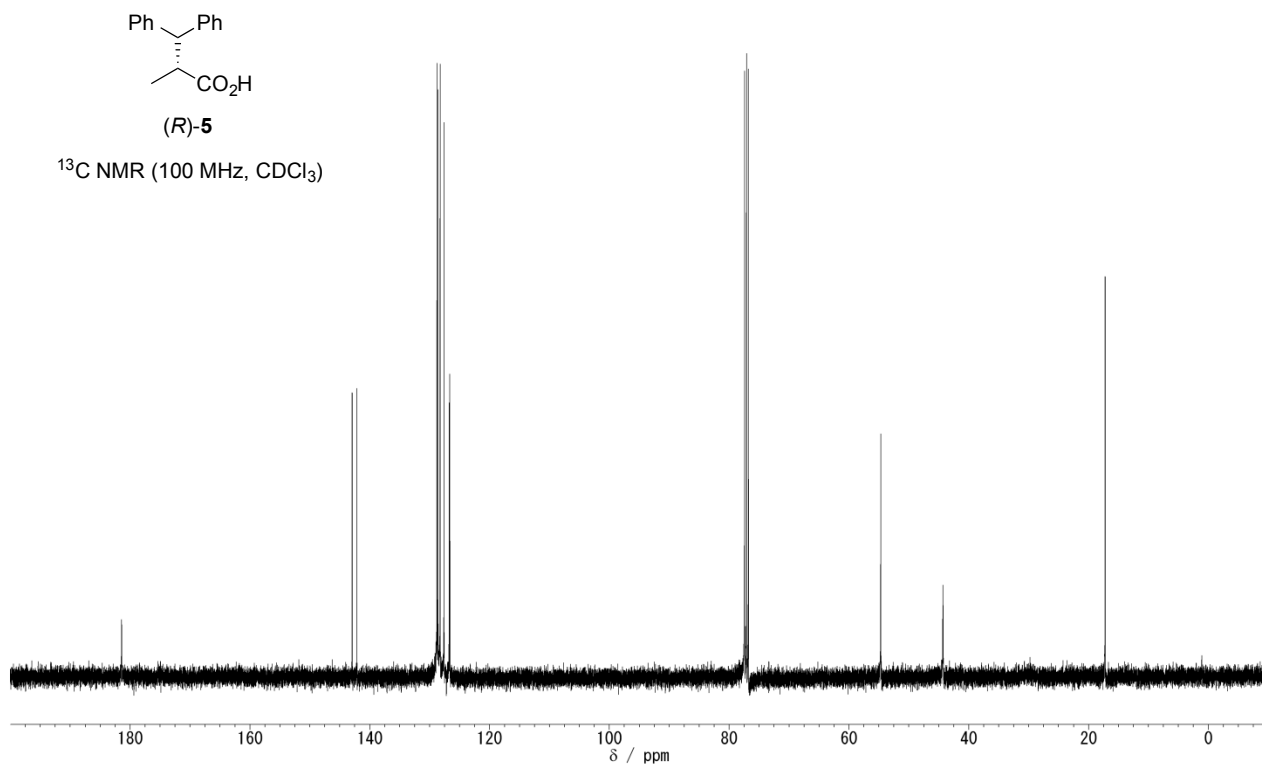

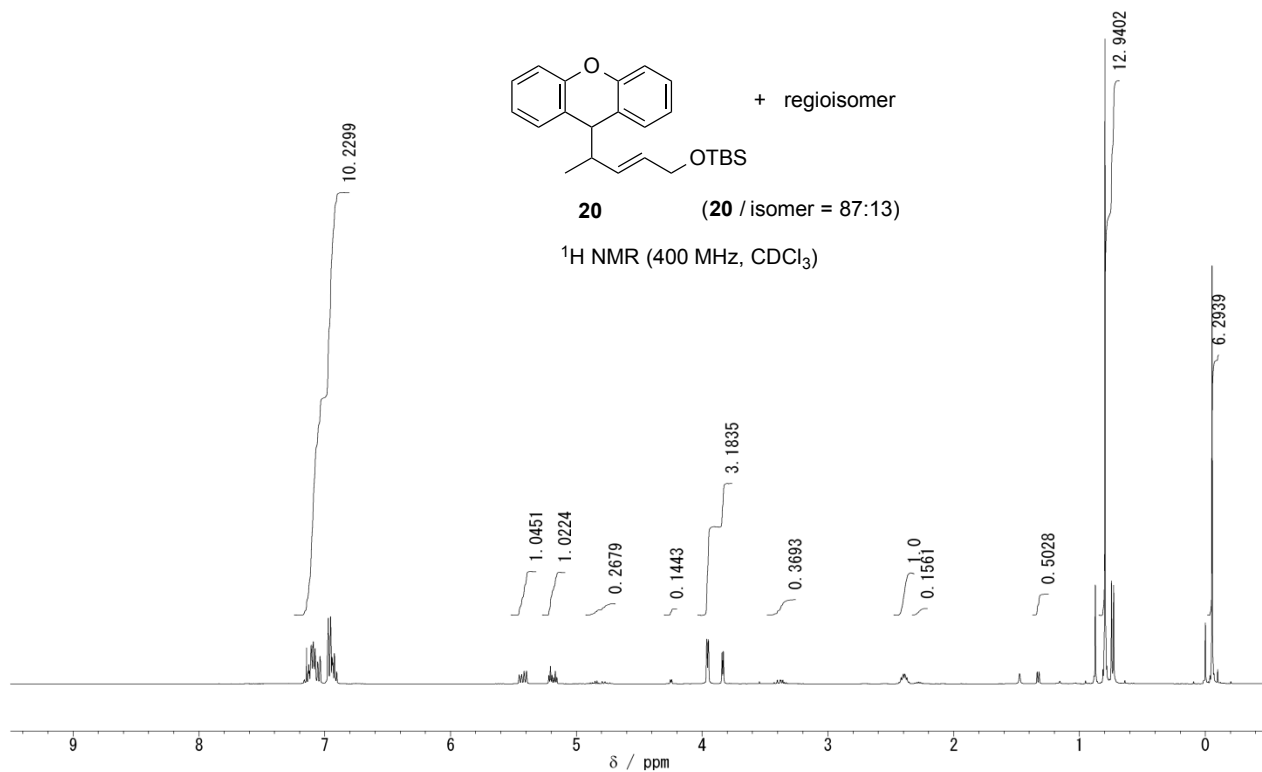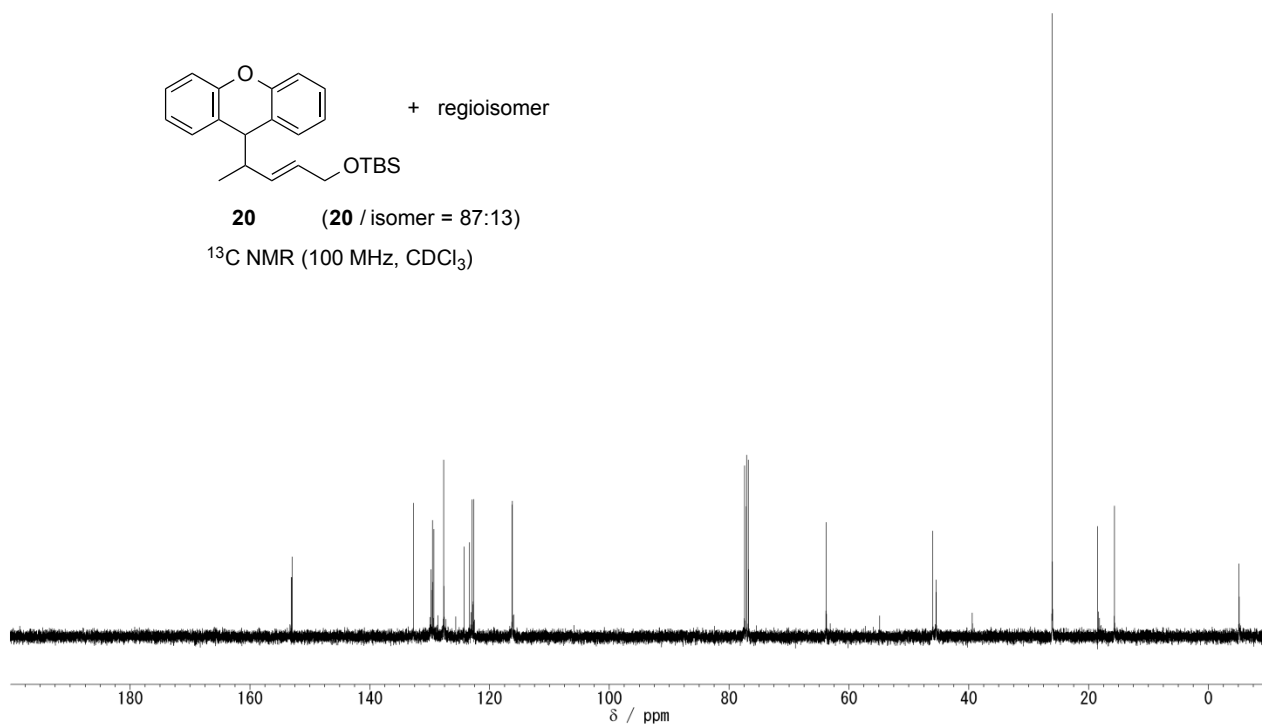

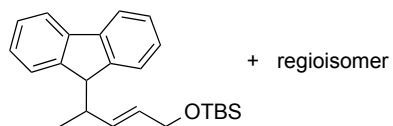

**21** (**21** / isomer = 85:15)

$^1\text{H NMR}$  (400 MHz,  $\text{CDCl}_3$ )

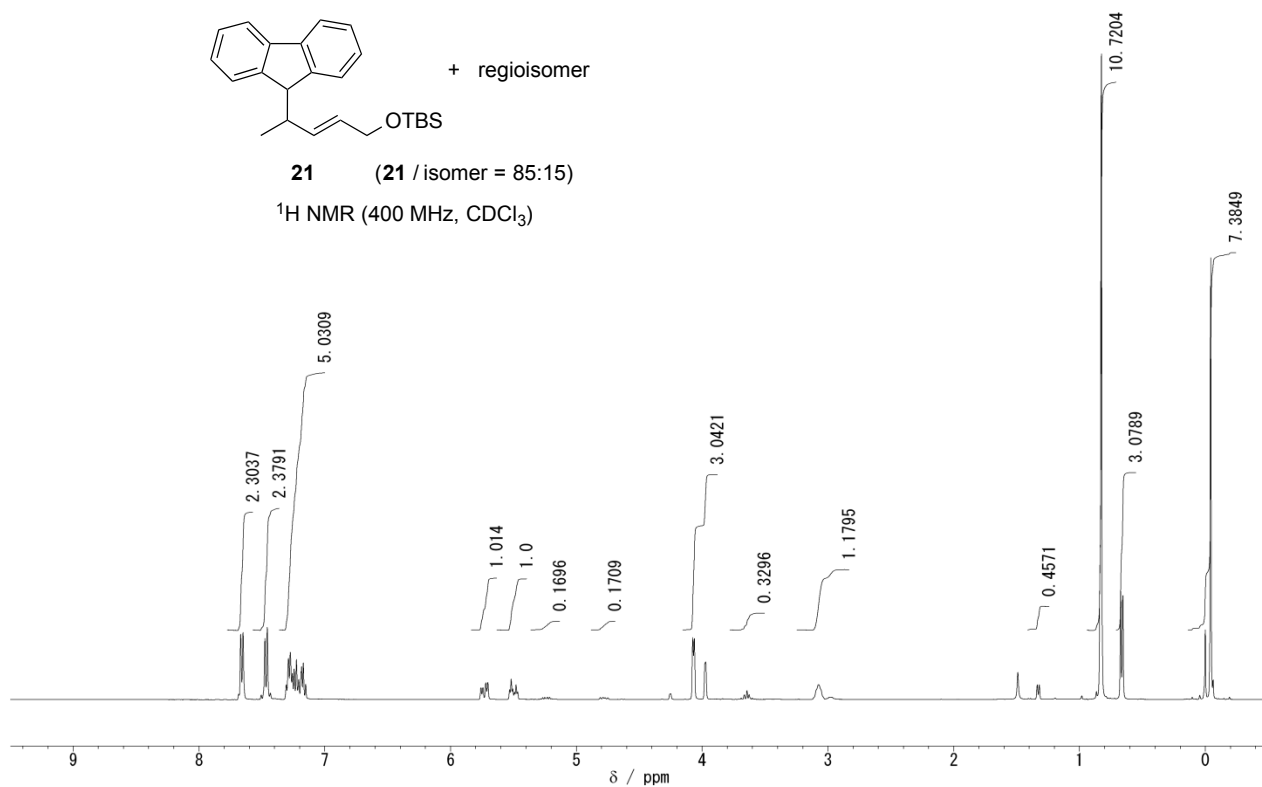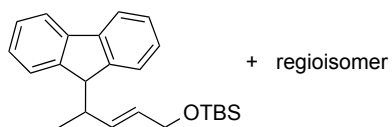

**21** (**21** / isomer = 85:15)

$^{13}\text{C NMR}$  (100 MHz,  $\text{CDCl}_3$ )

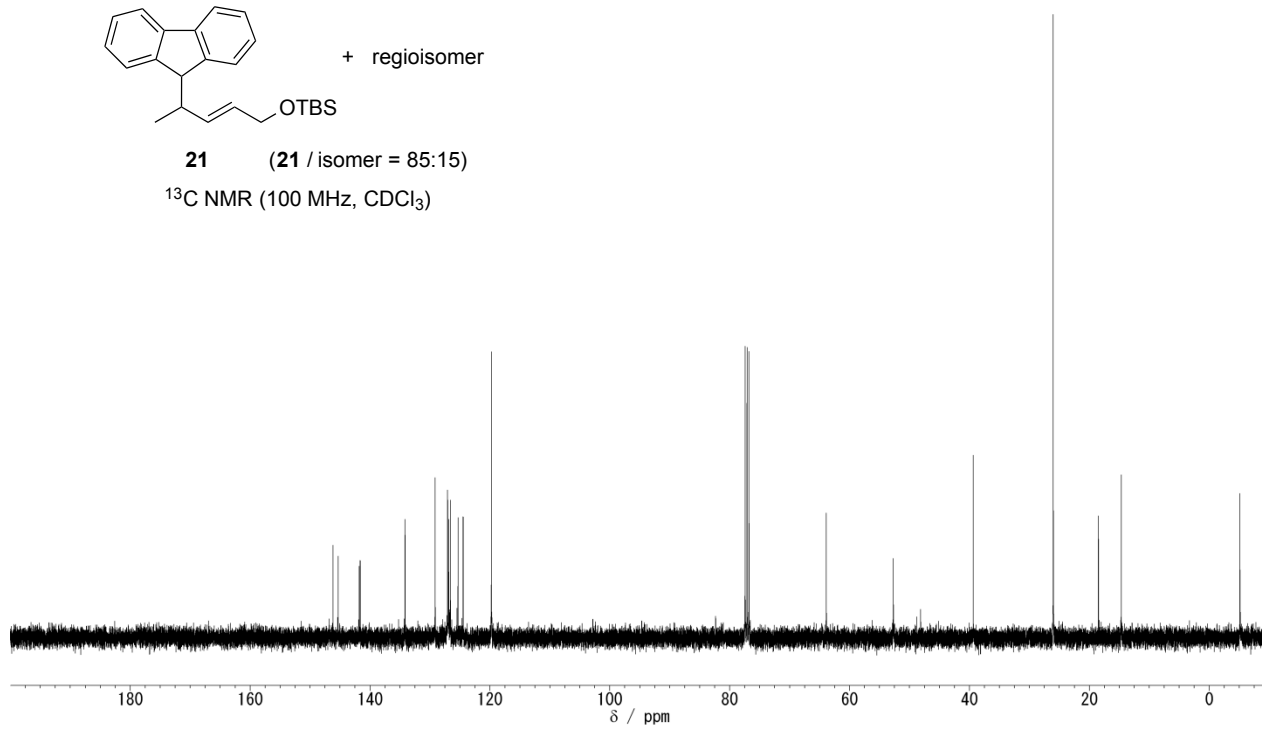

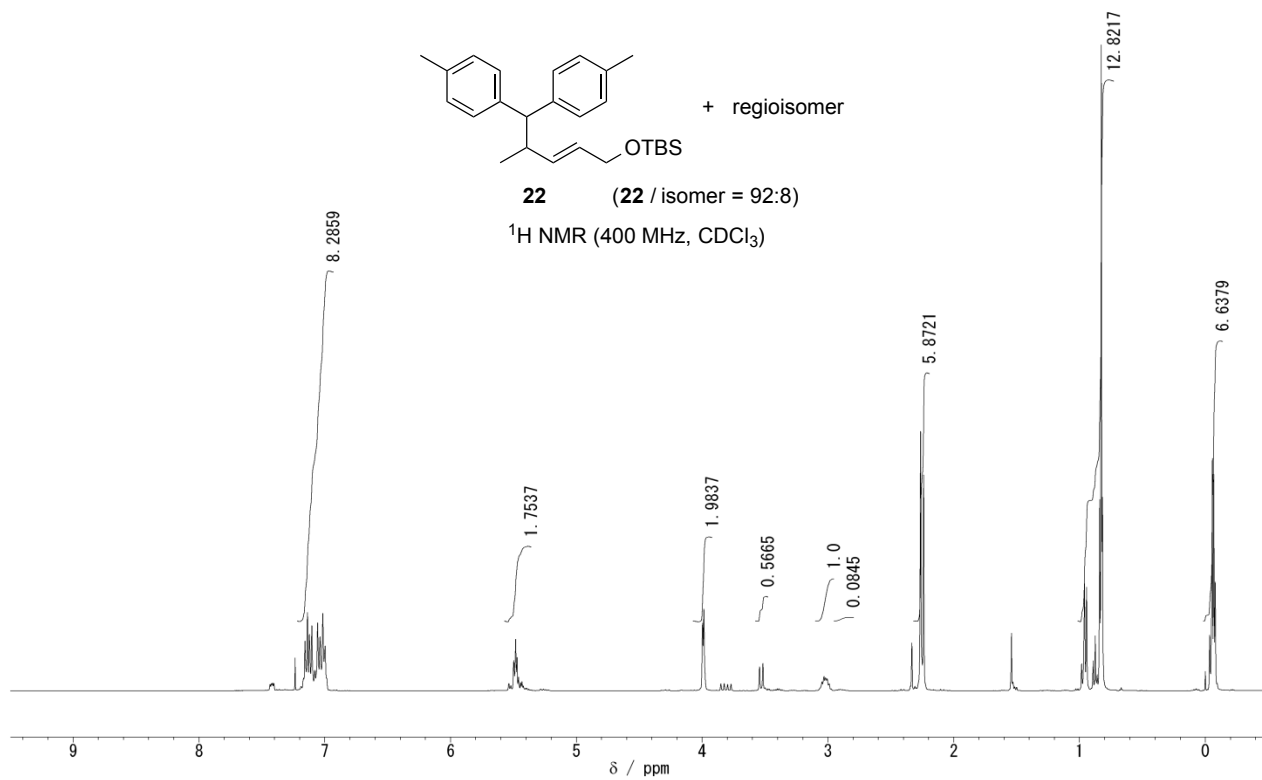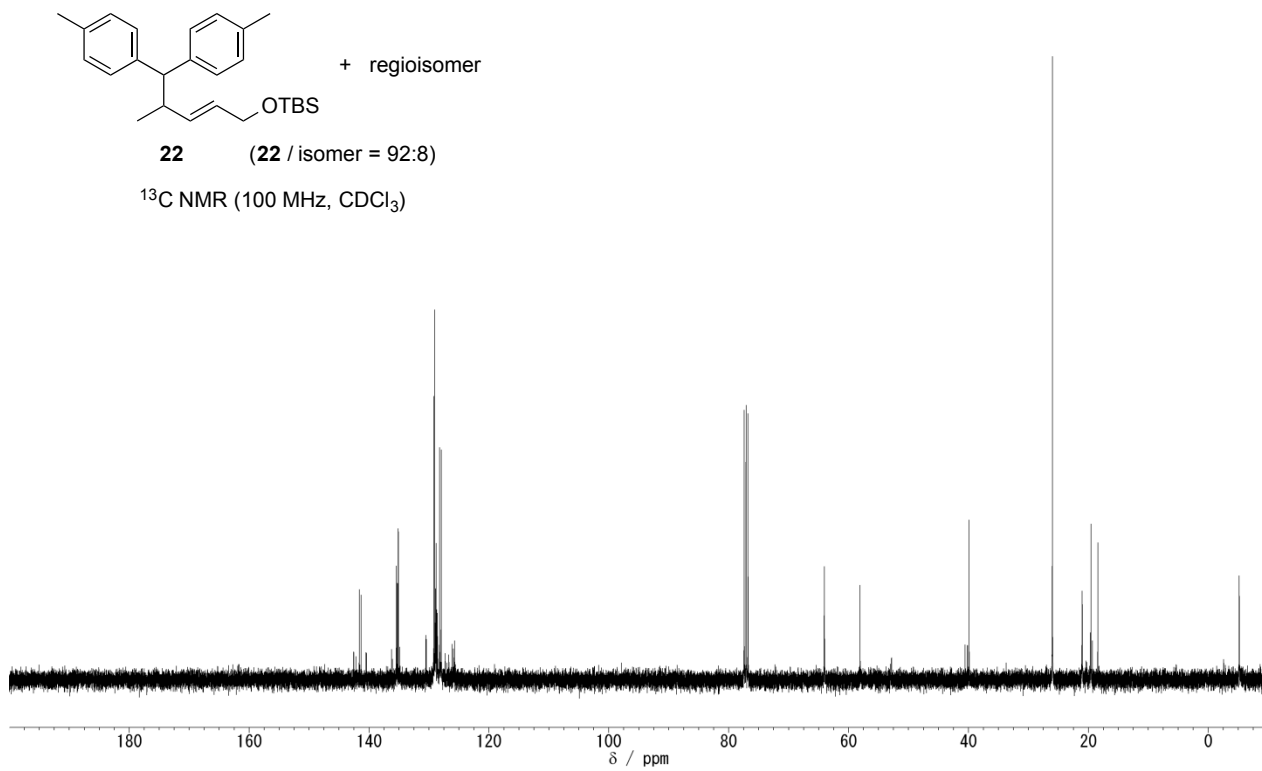

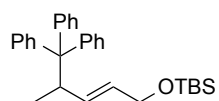

**122**

<sup>1</sup>H NMR (300 MHz, CDCl<sub>3</sub>)

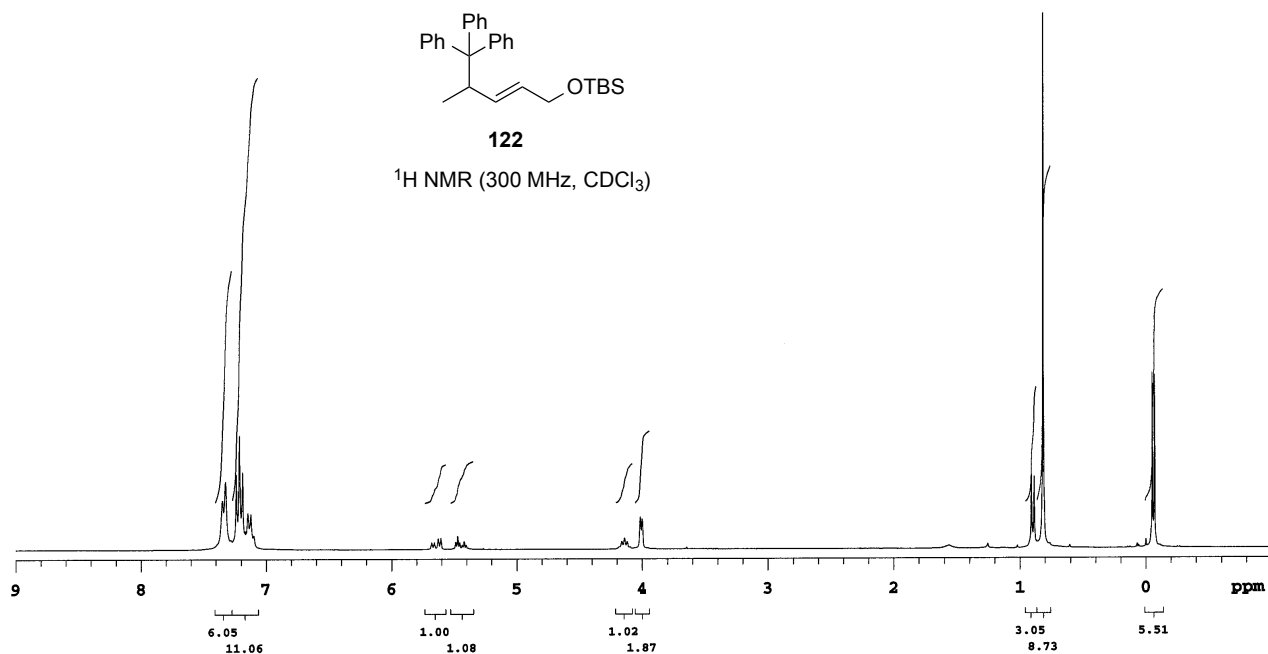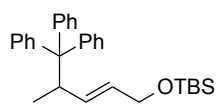

**122**

<sup>13</sup>C NMR (75 MHz, CDCl<sub>3</sub>)

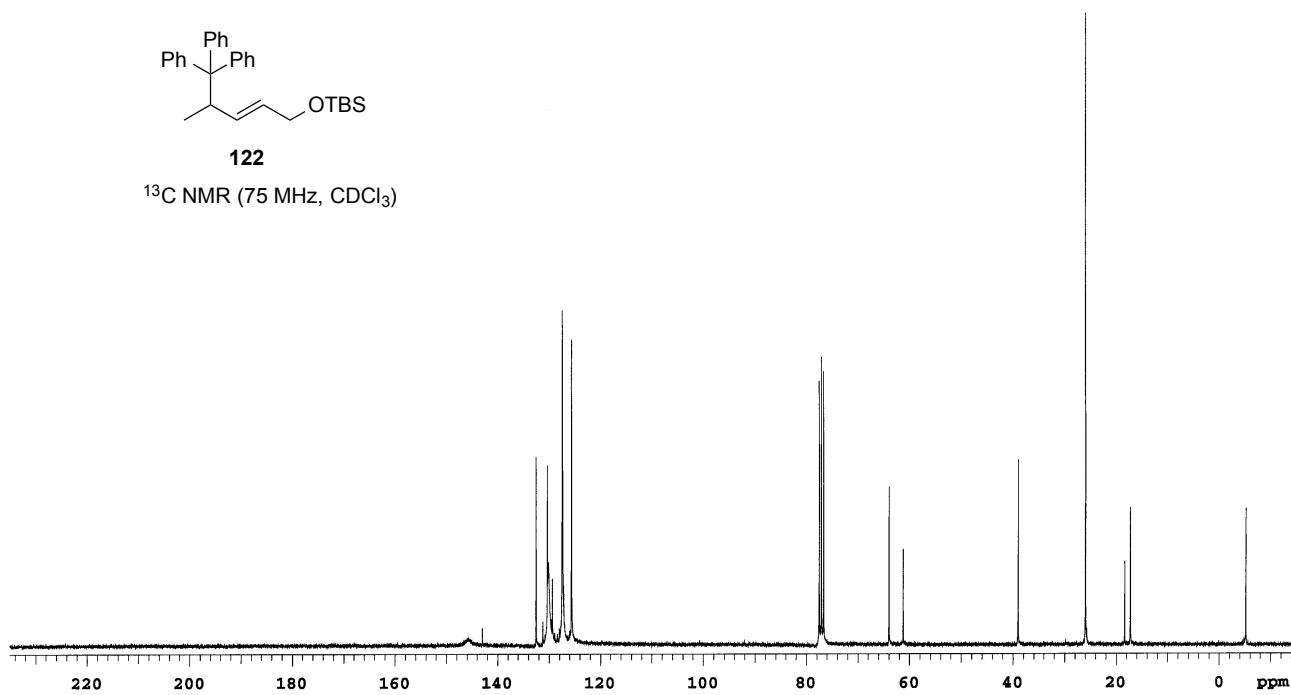

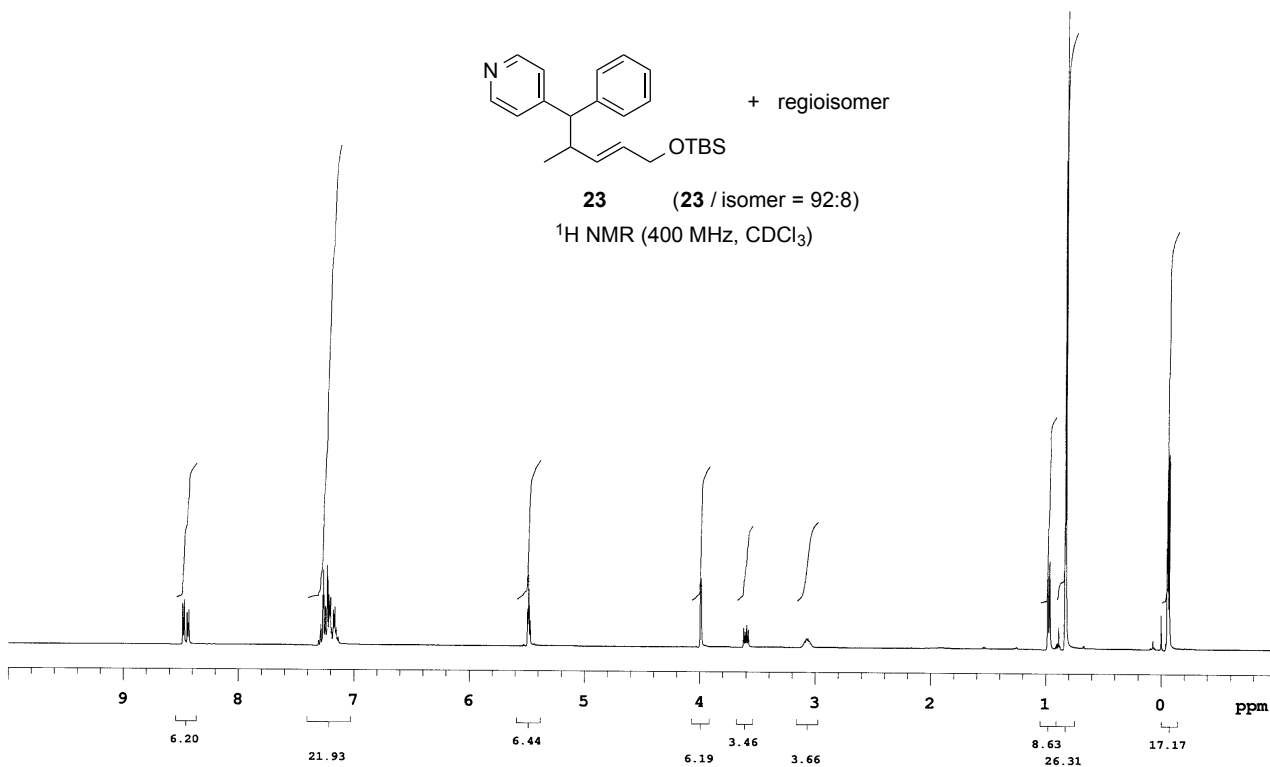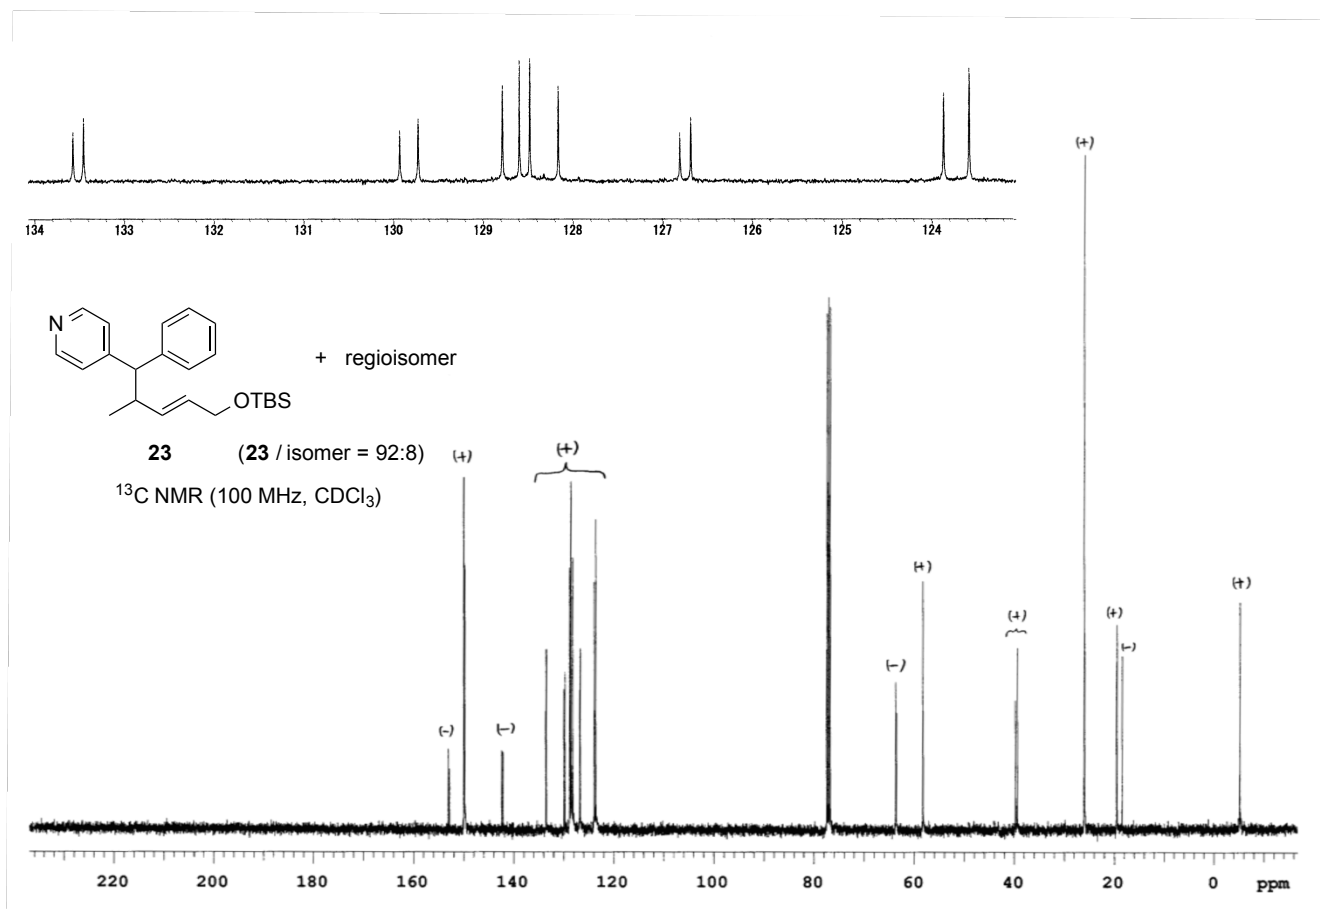

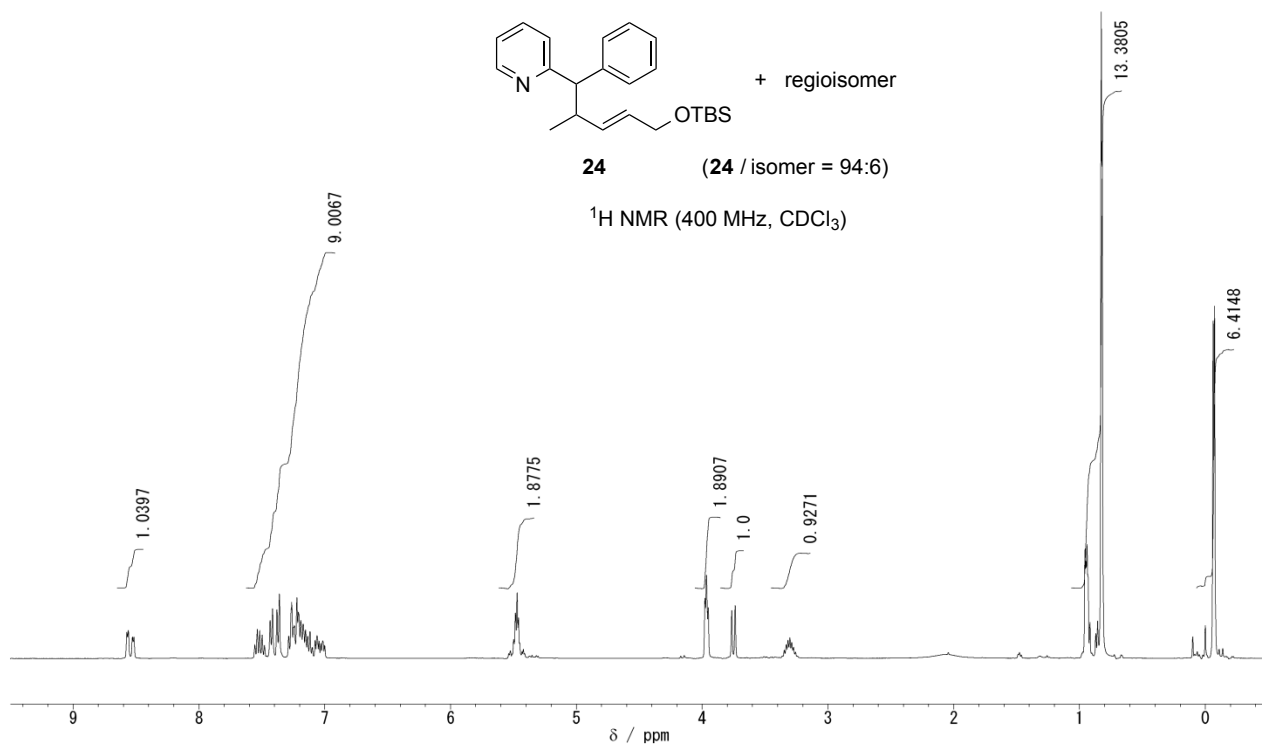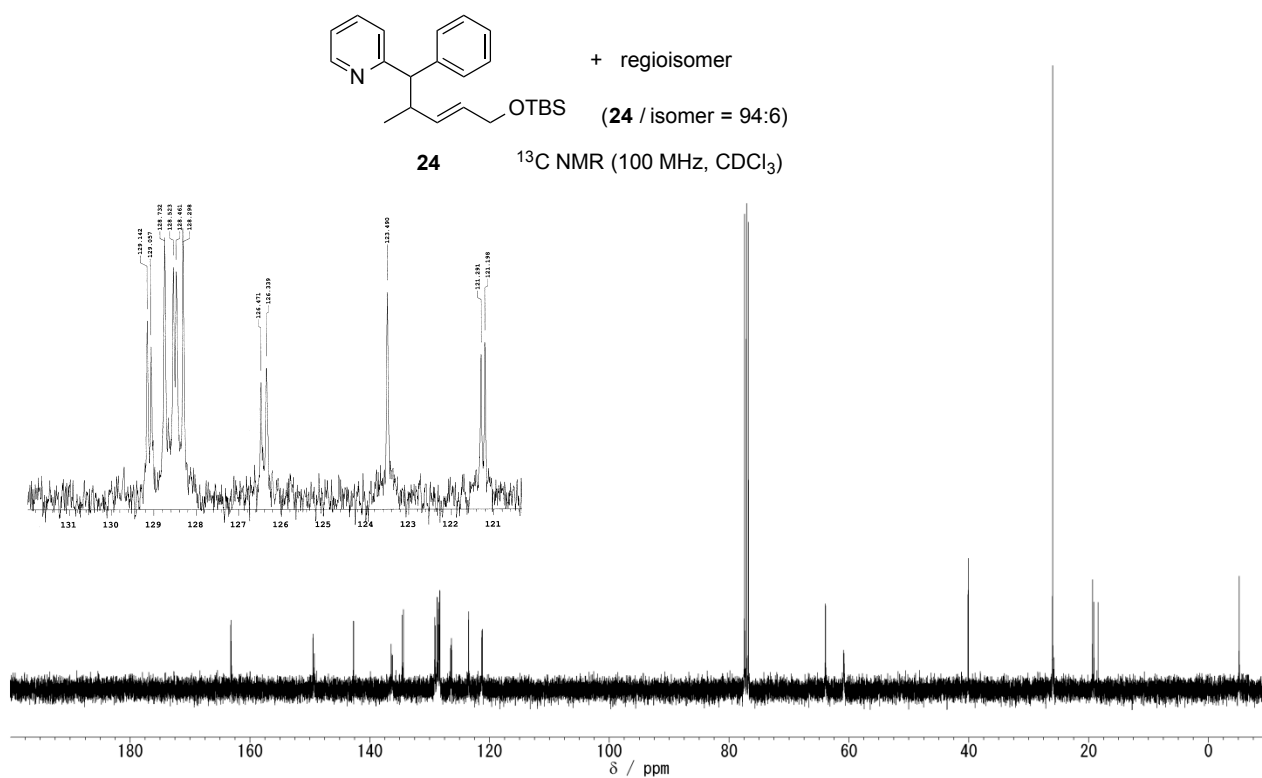

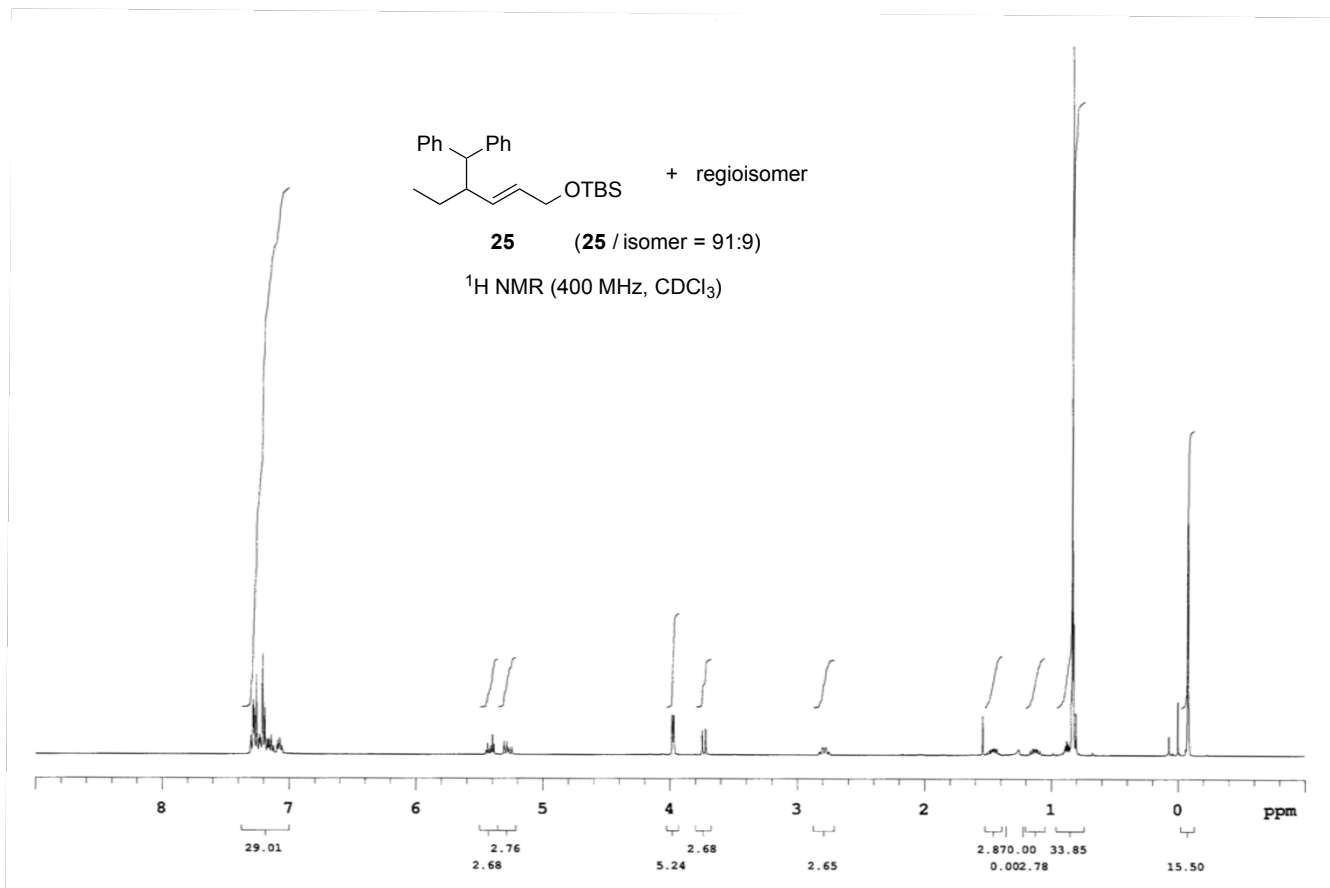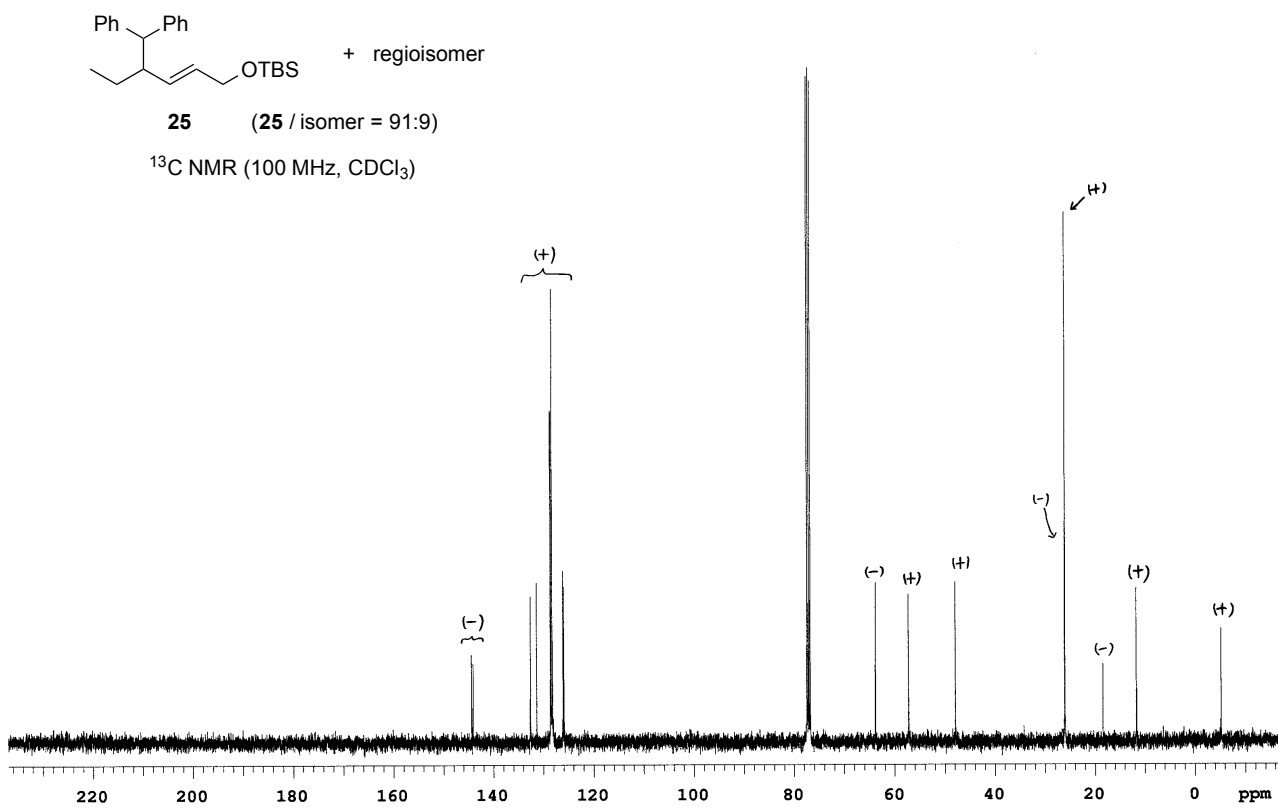



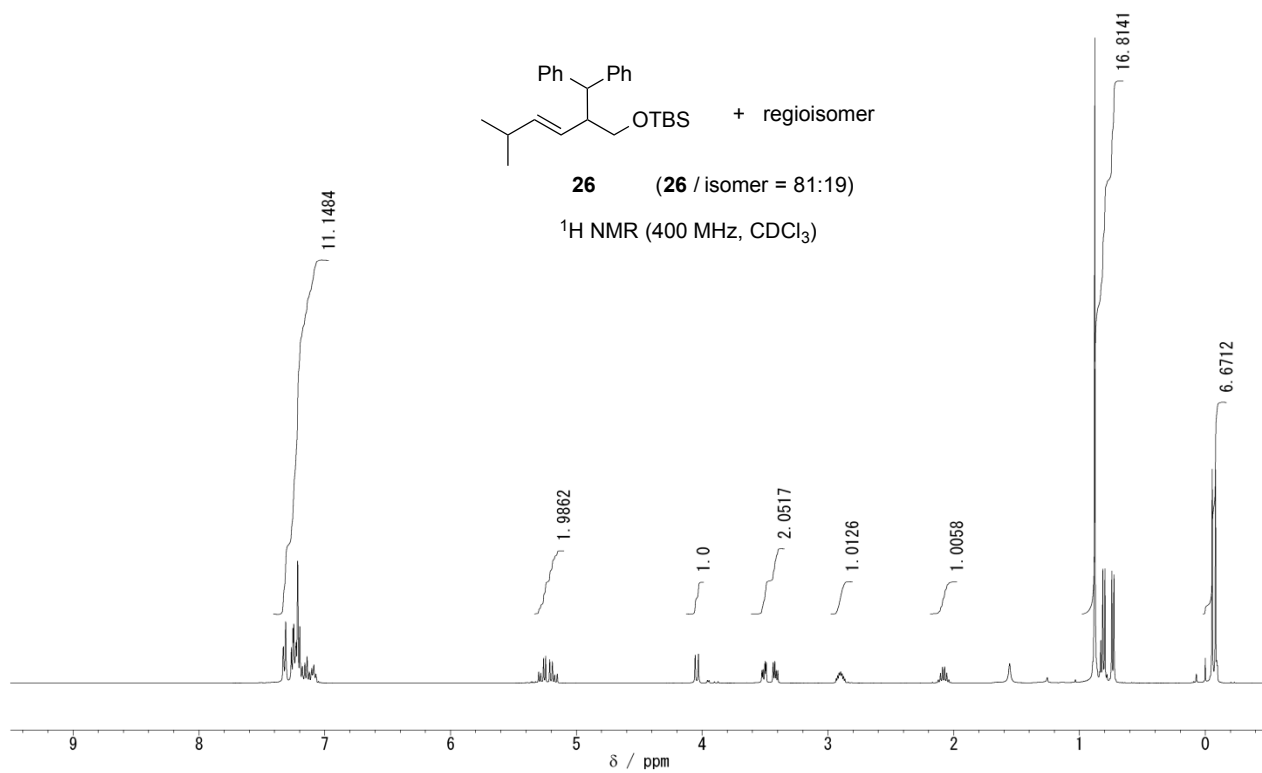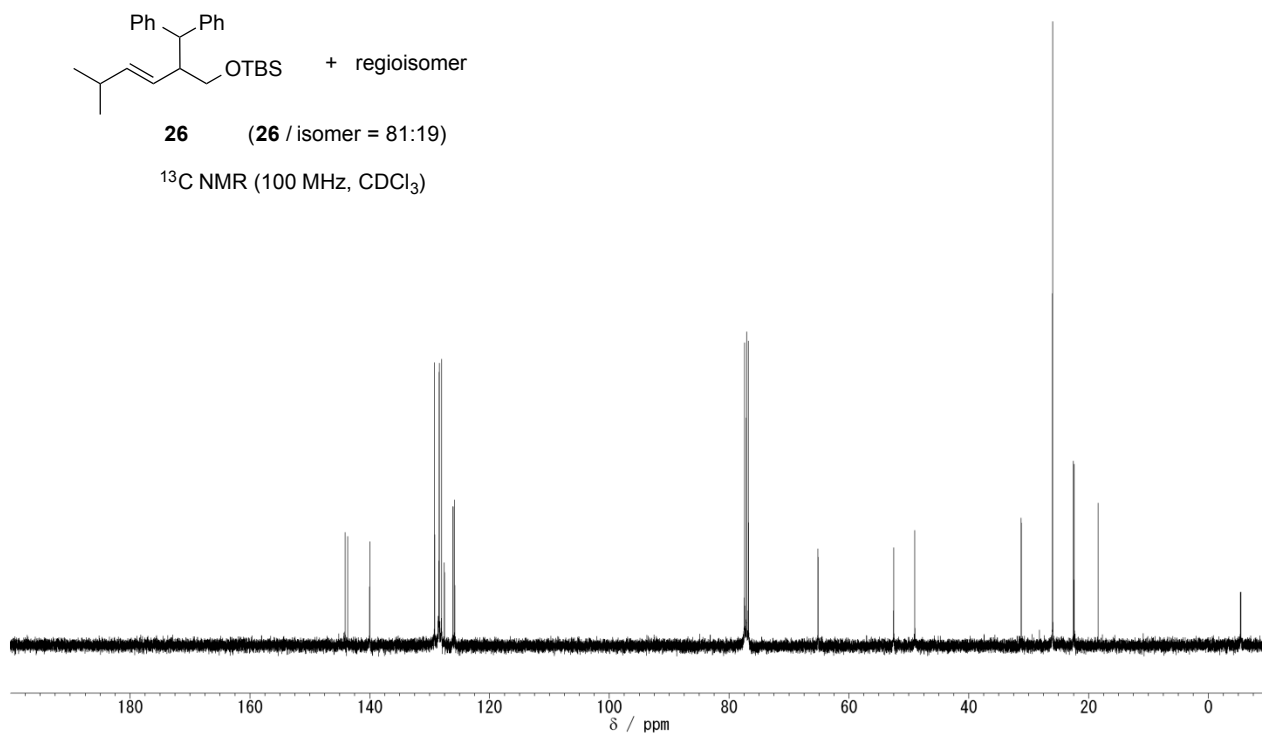

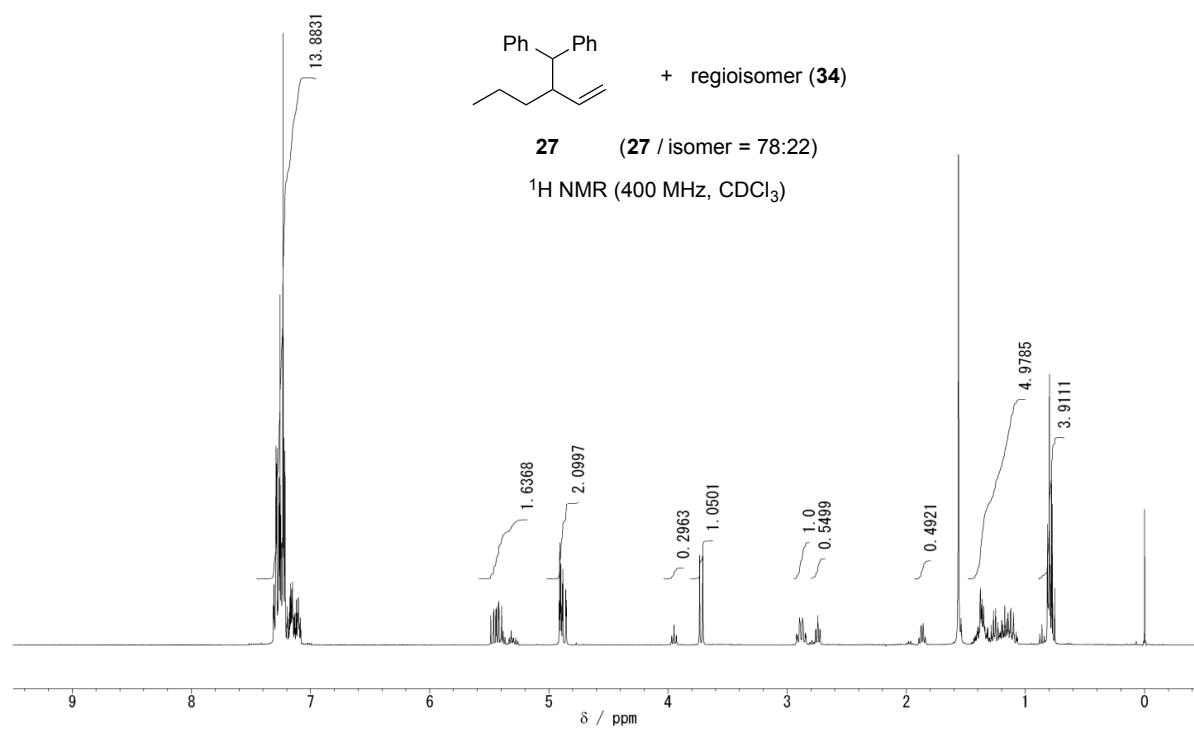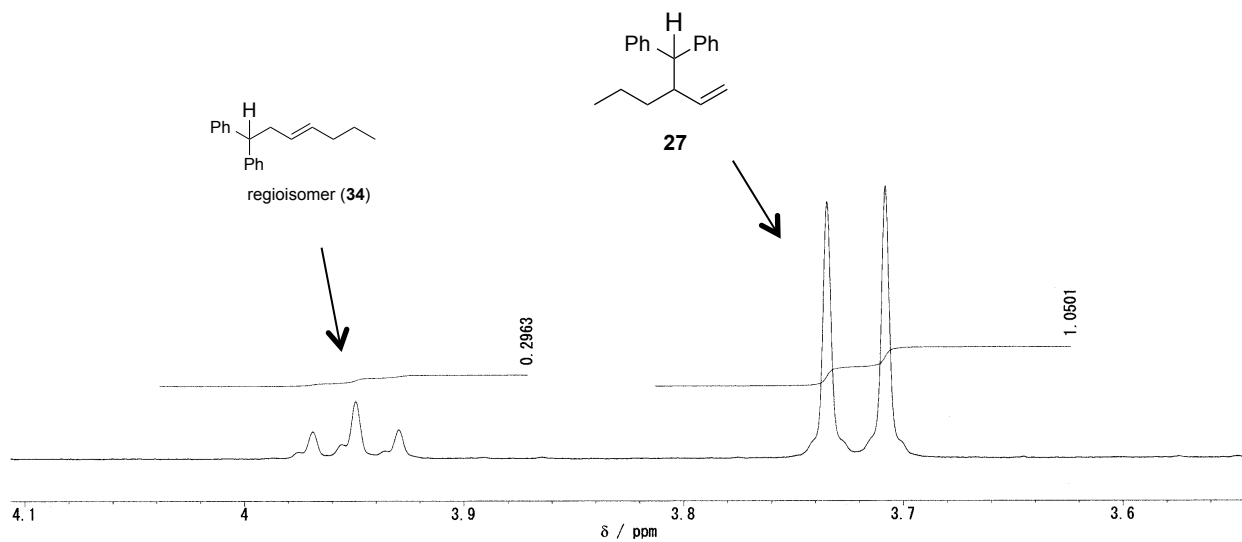

**27** : regioisomer  
 = 1.0501 : 0.2963  
 = 78 : 22

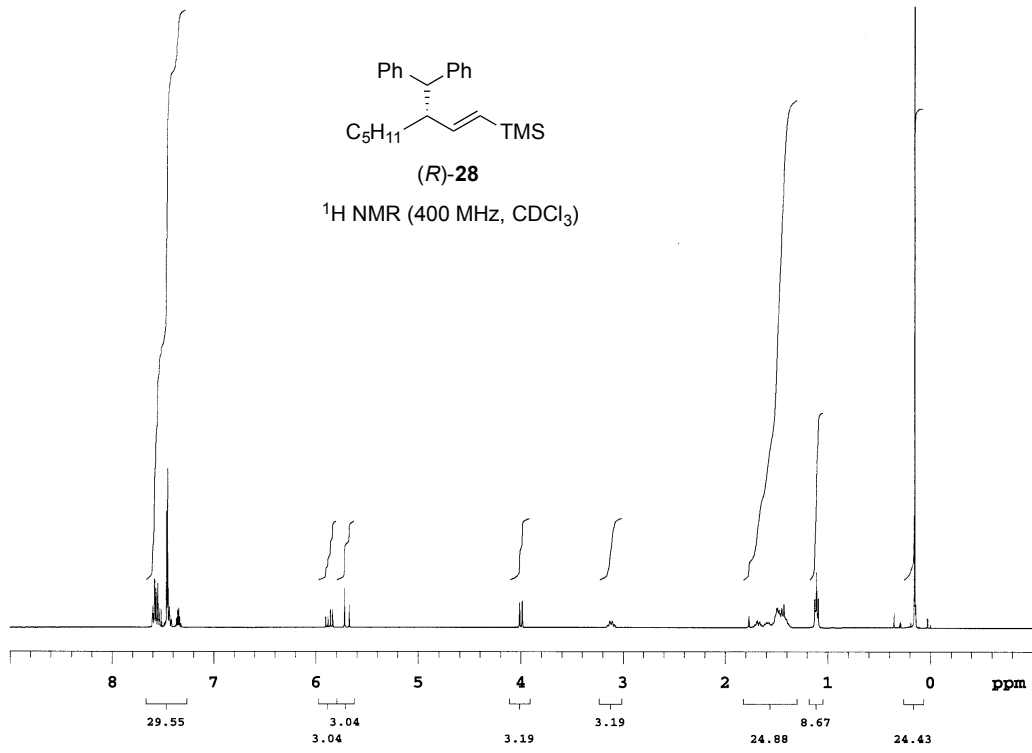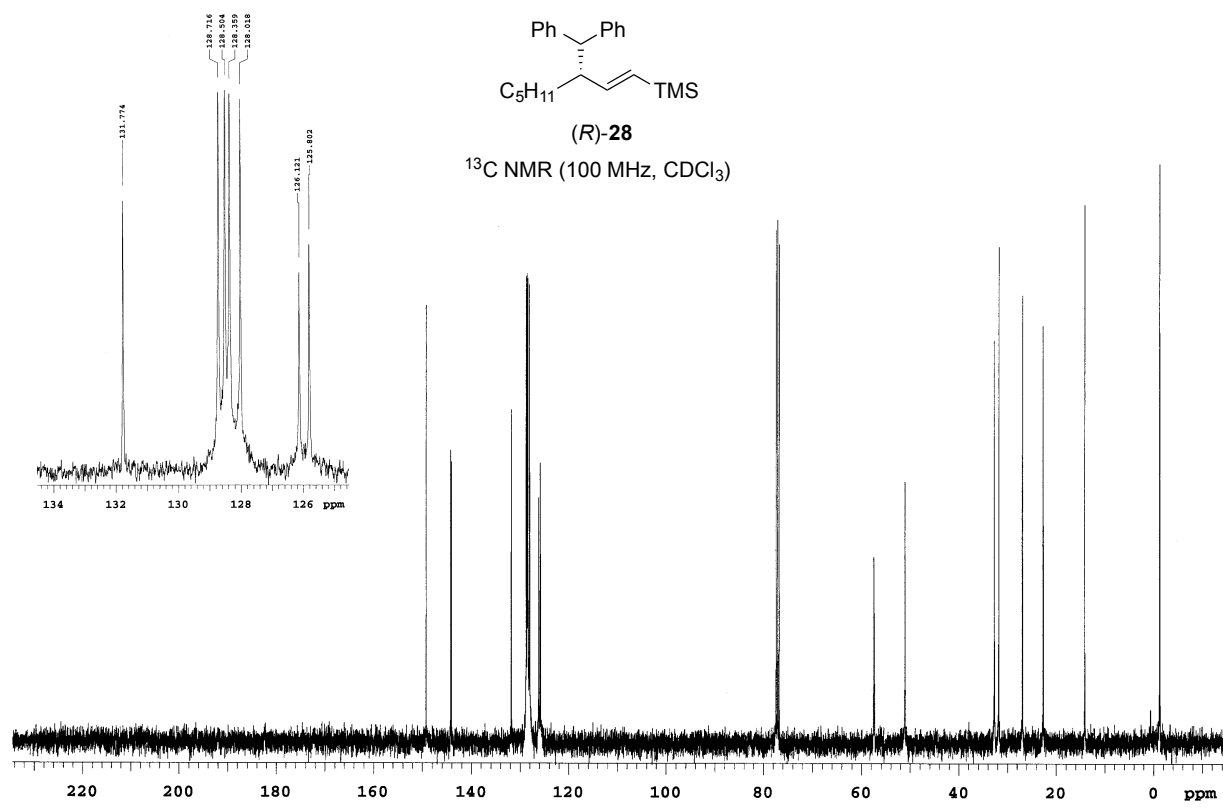

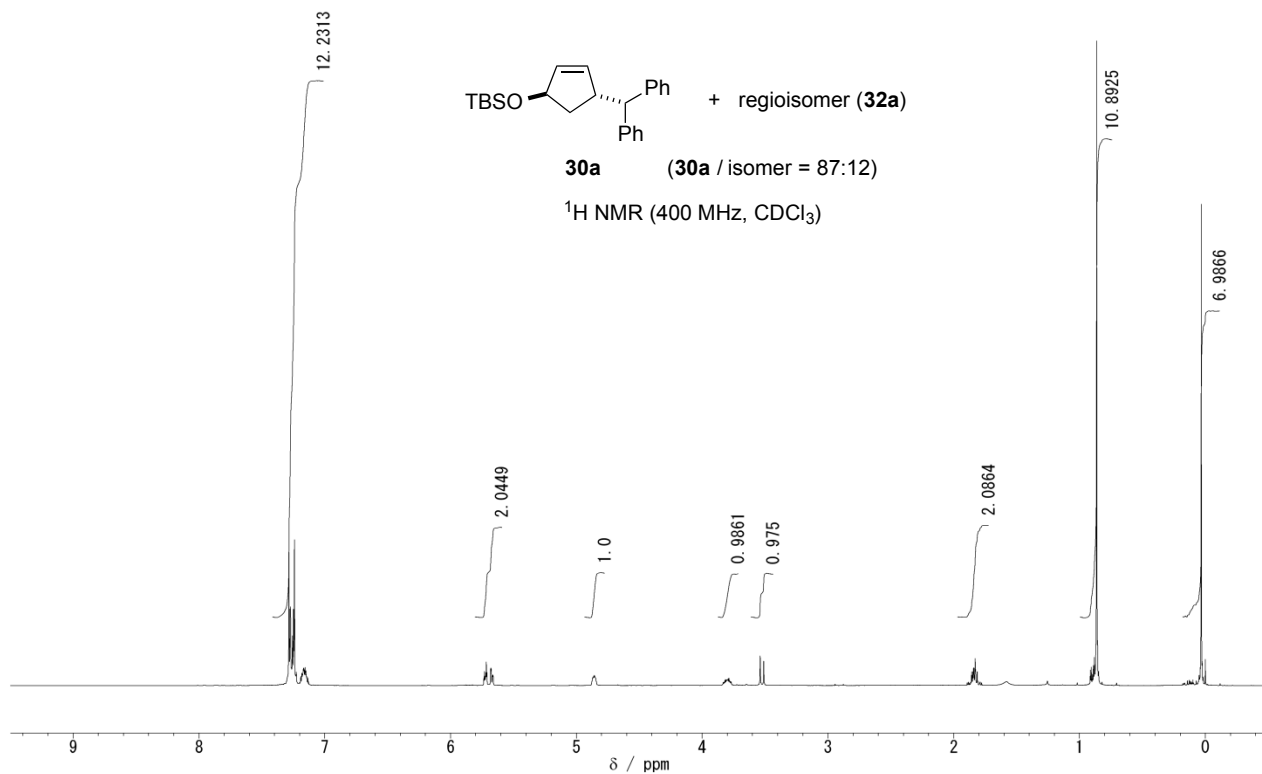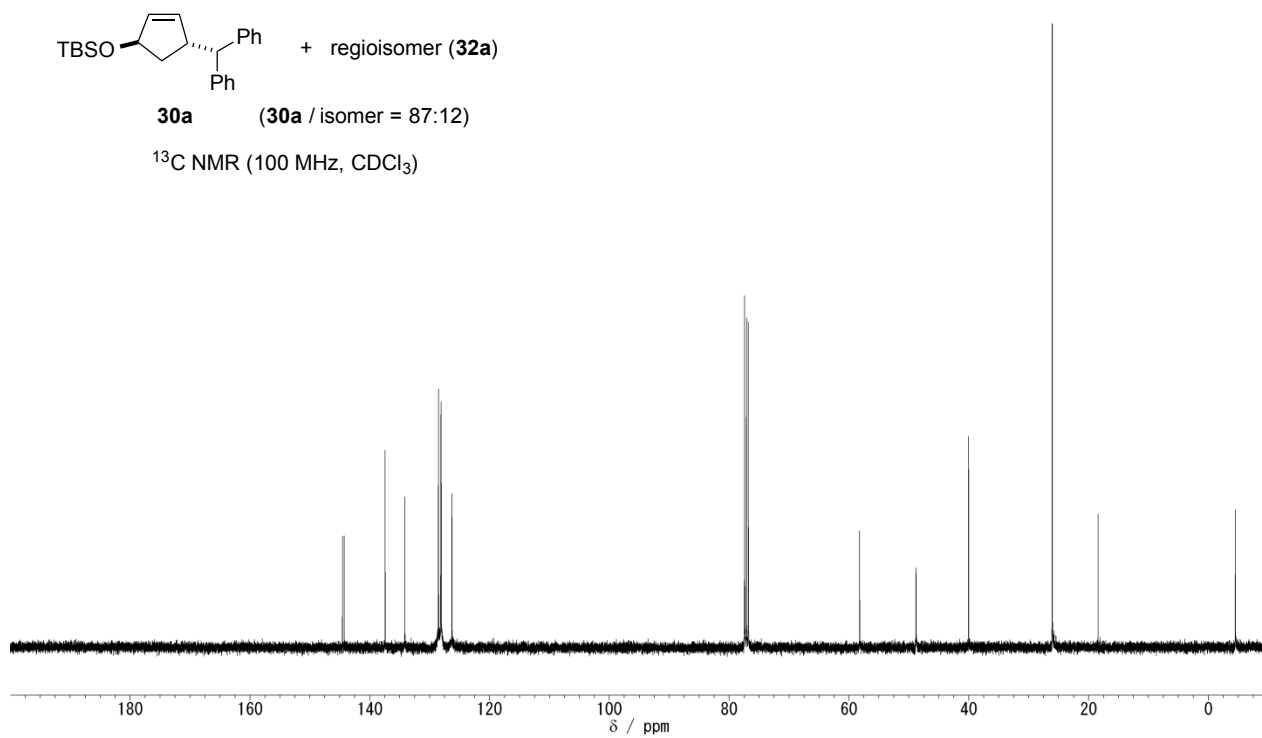

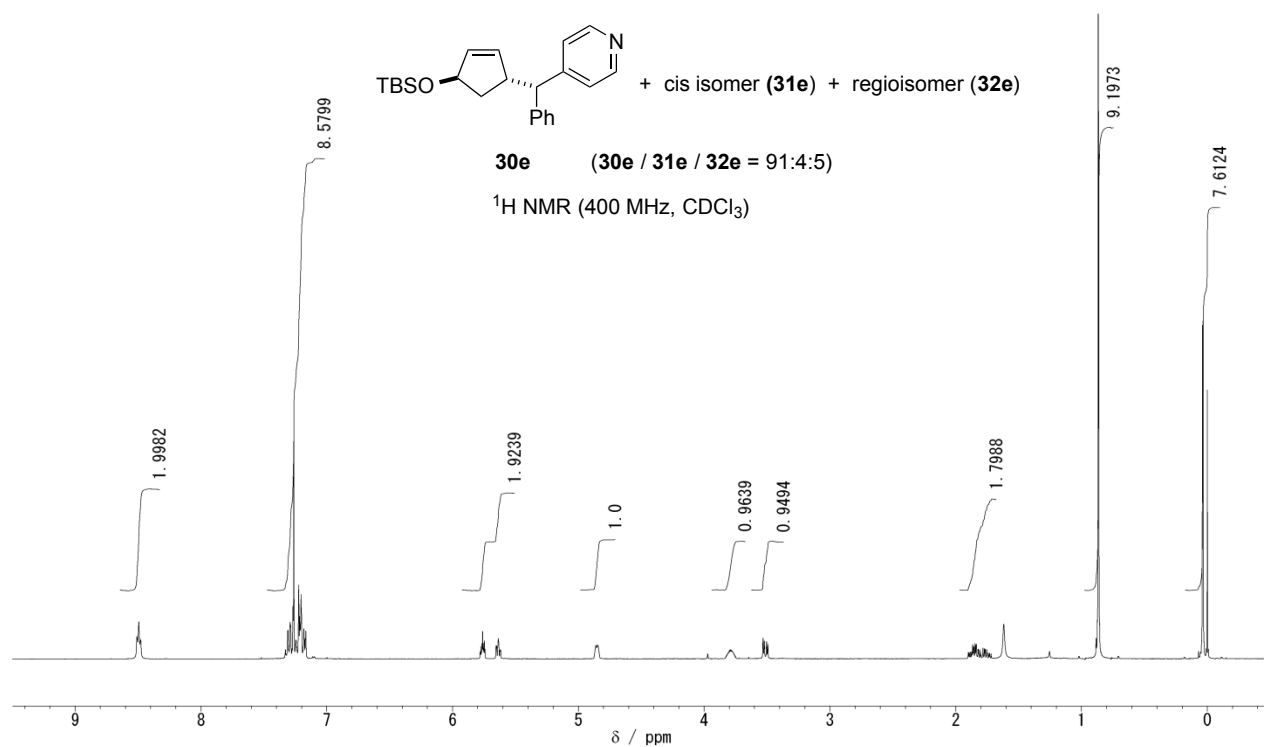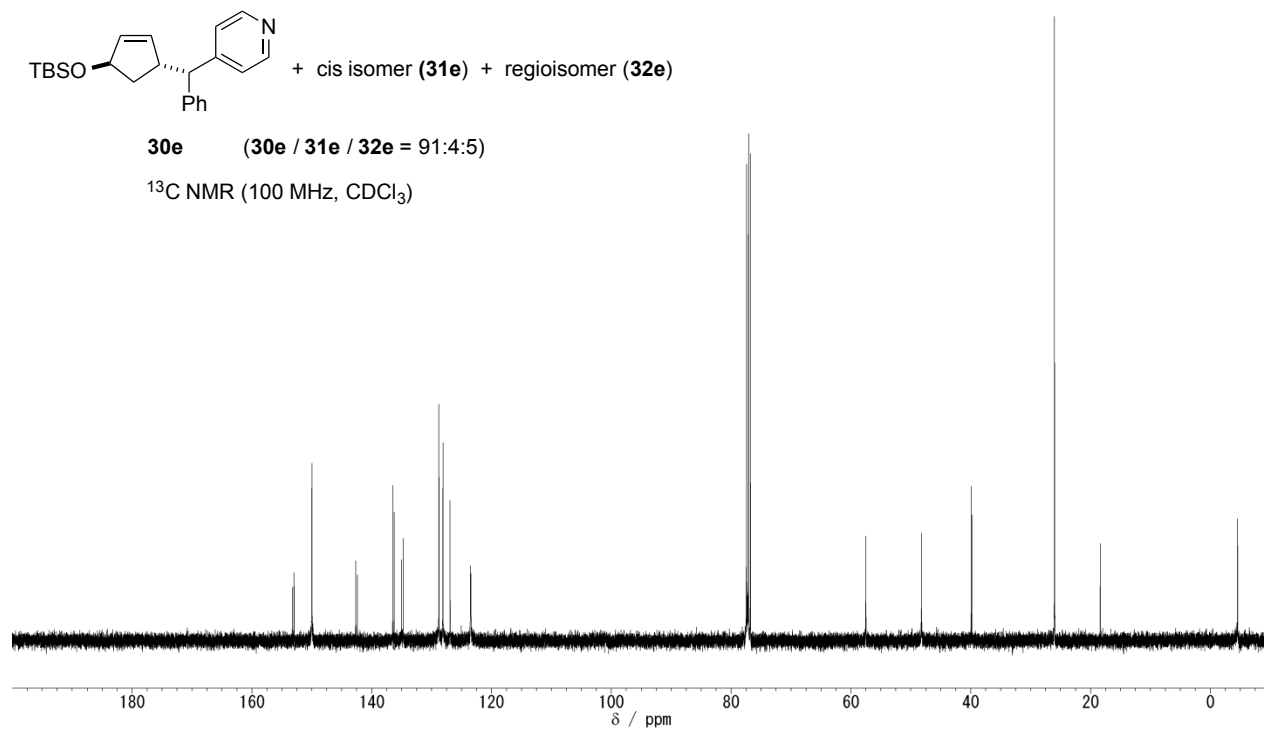

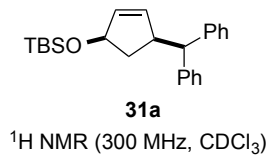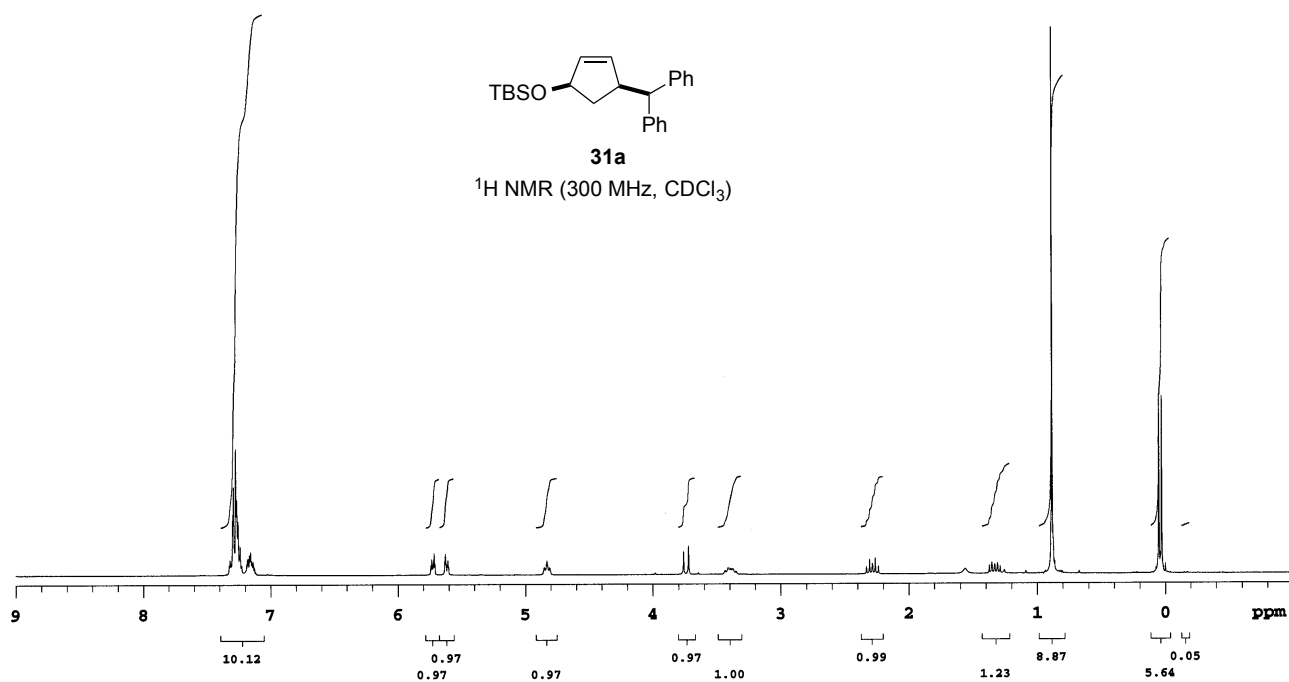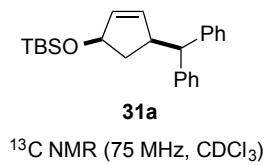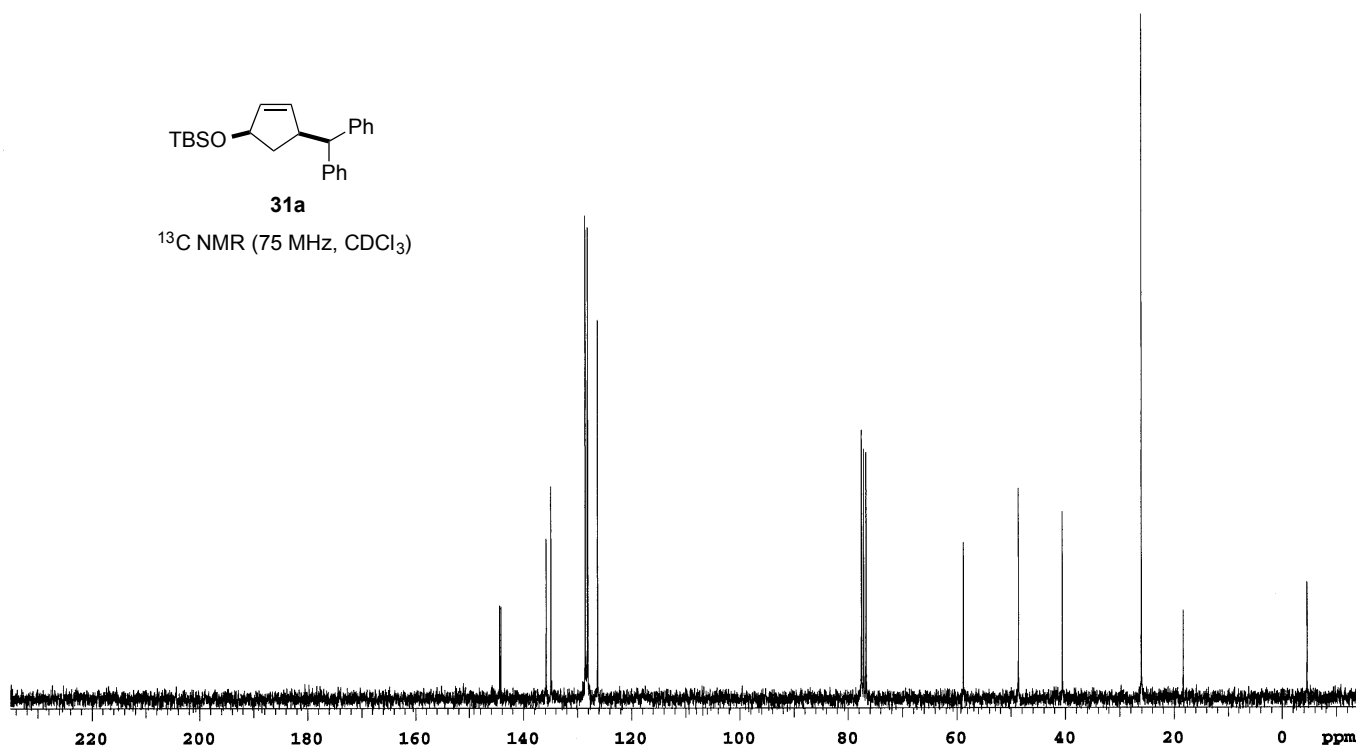

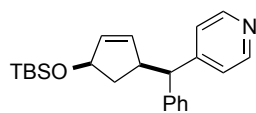

**31e**

<sup>1</sup>H NMR (400 MHz, CDCl<sub>3</sub>)

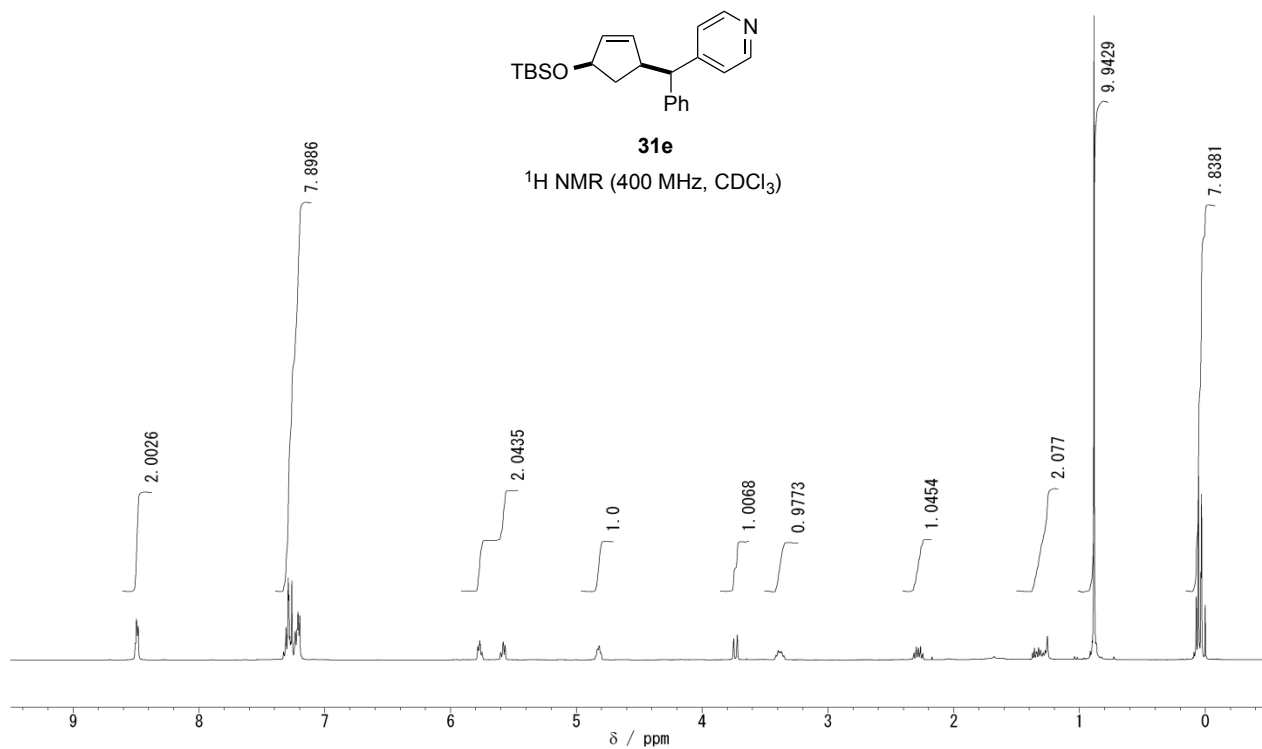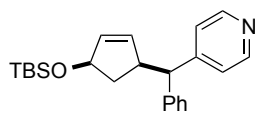

**31a**

<sup>13</sup>C NMR (100 MHz, CDCl<sub>3</sub>)

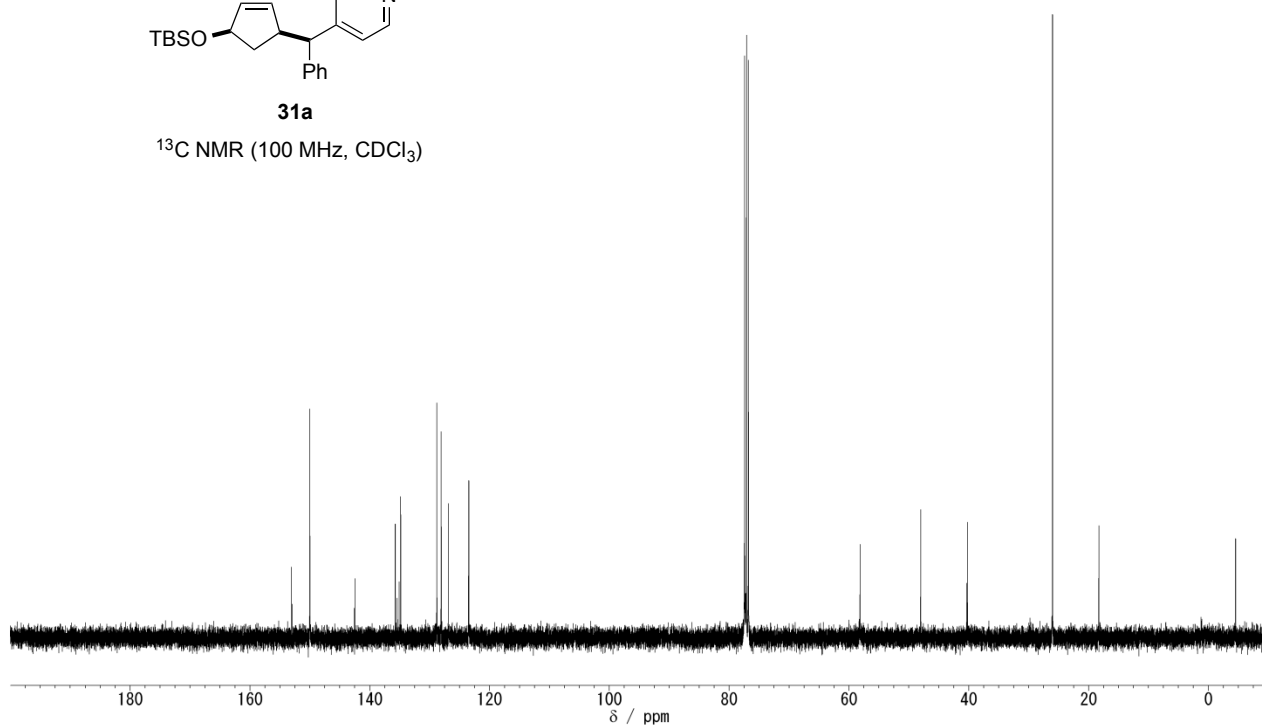

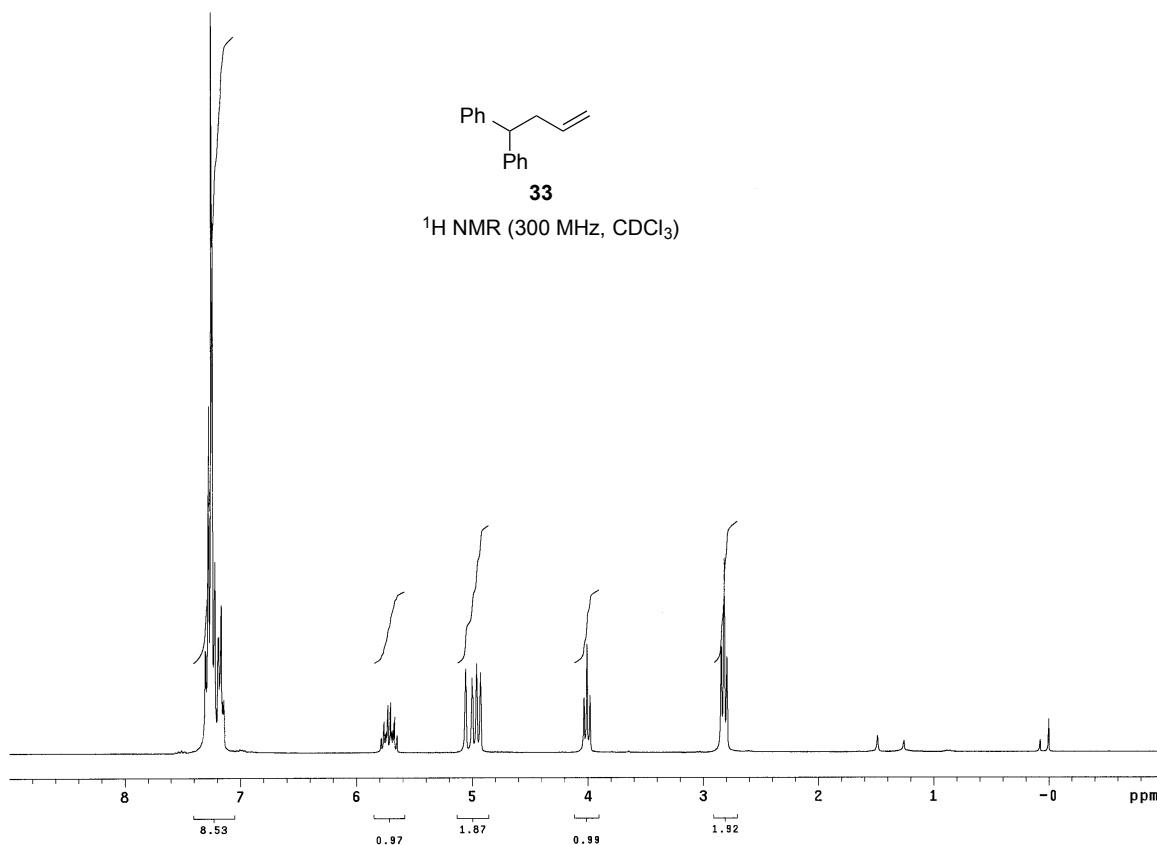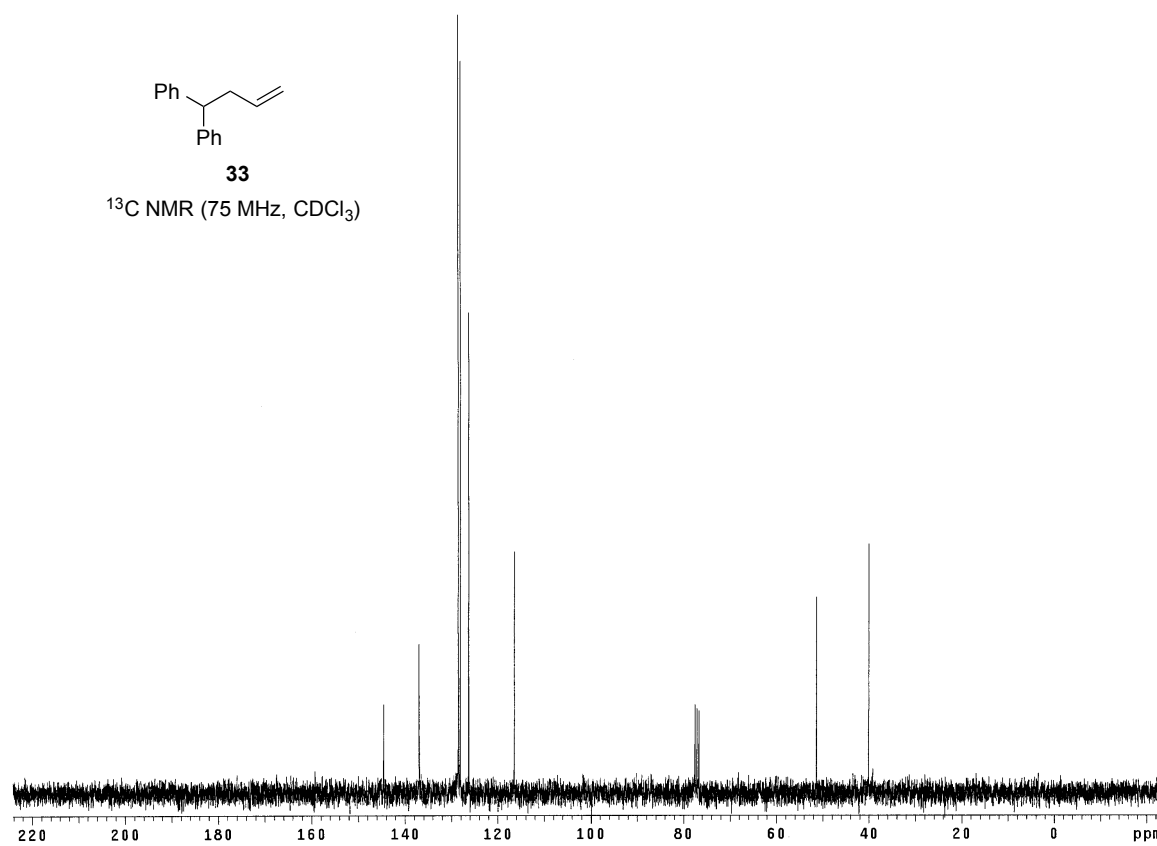



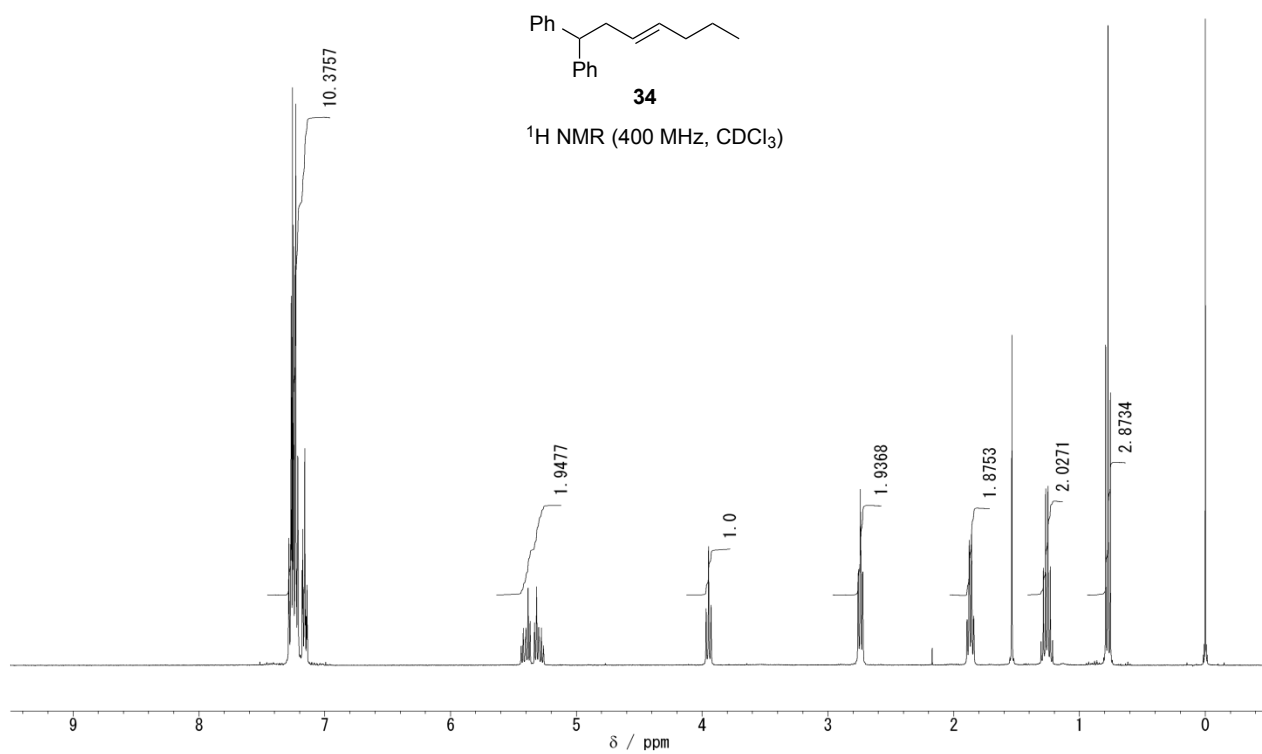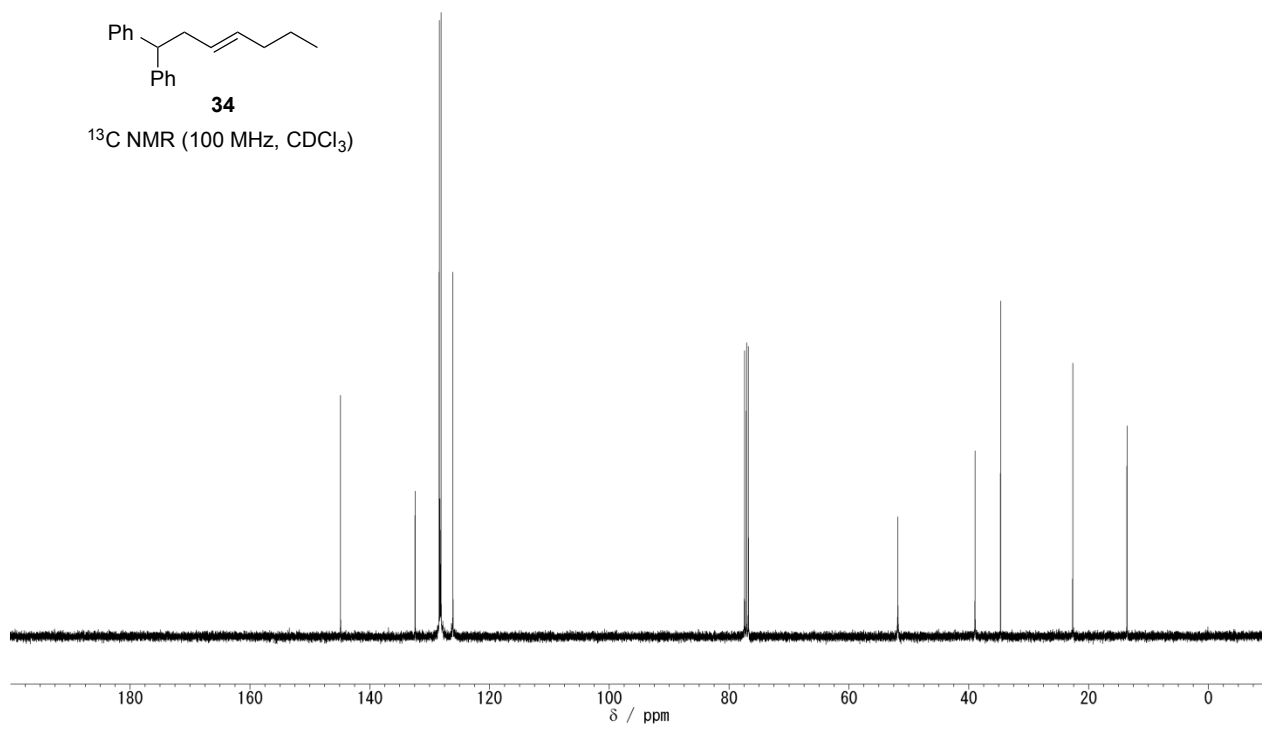

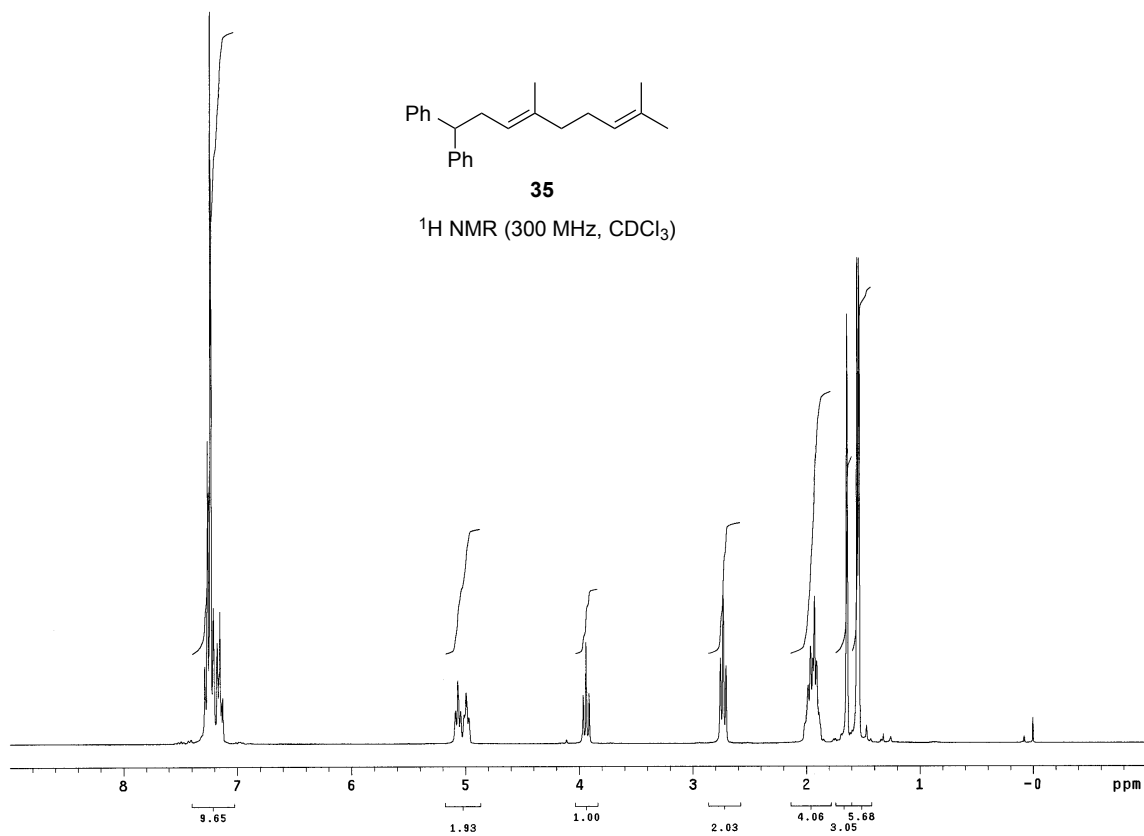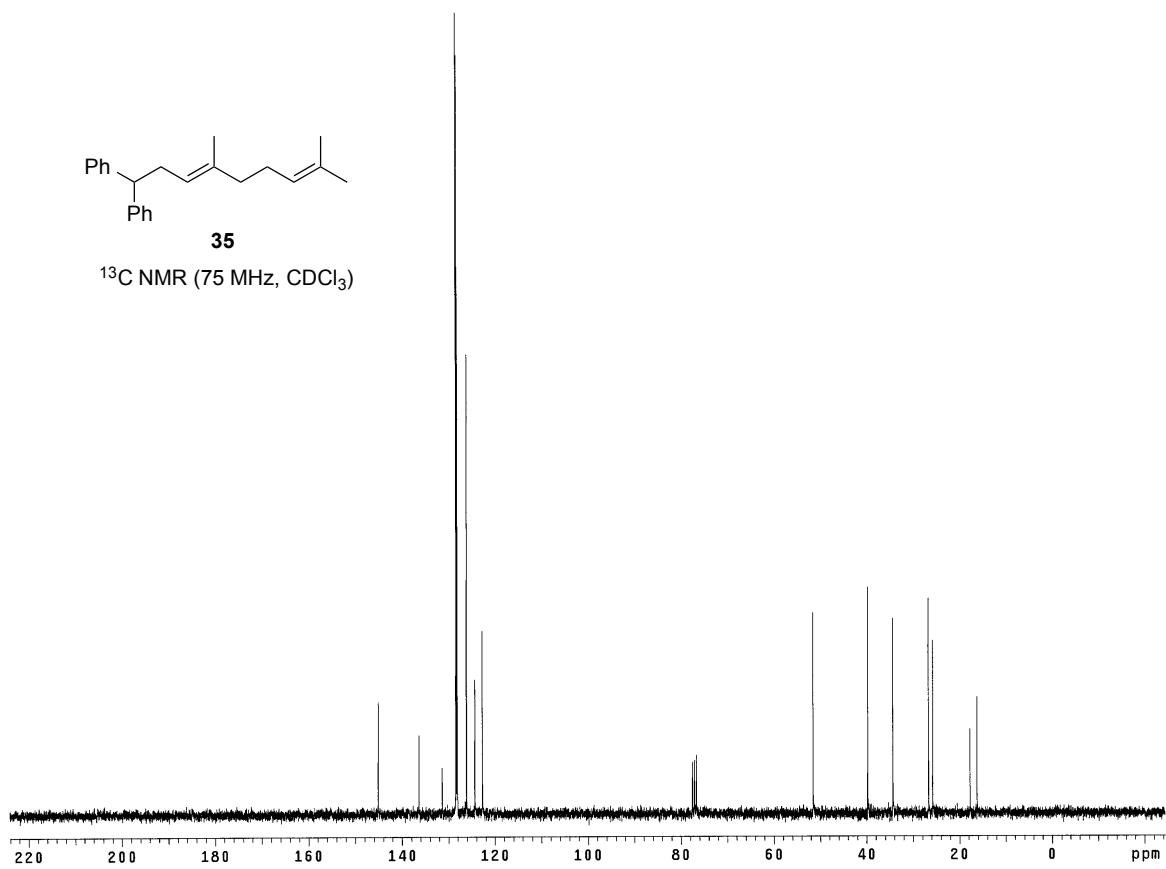

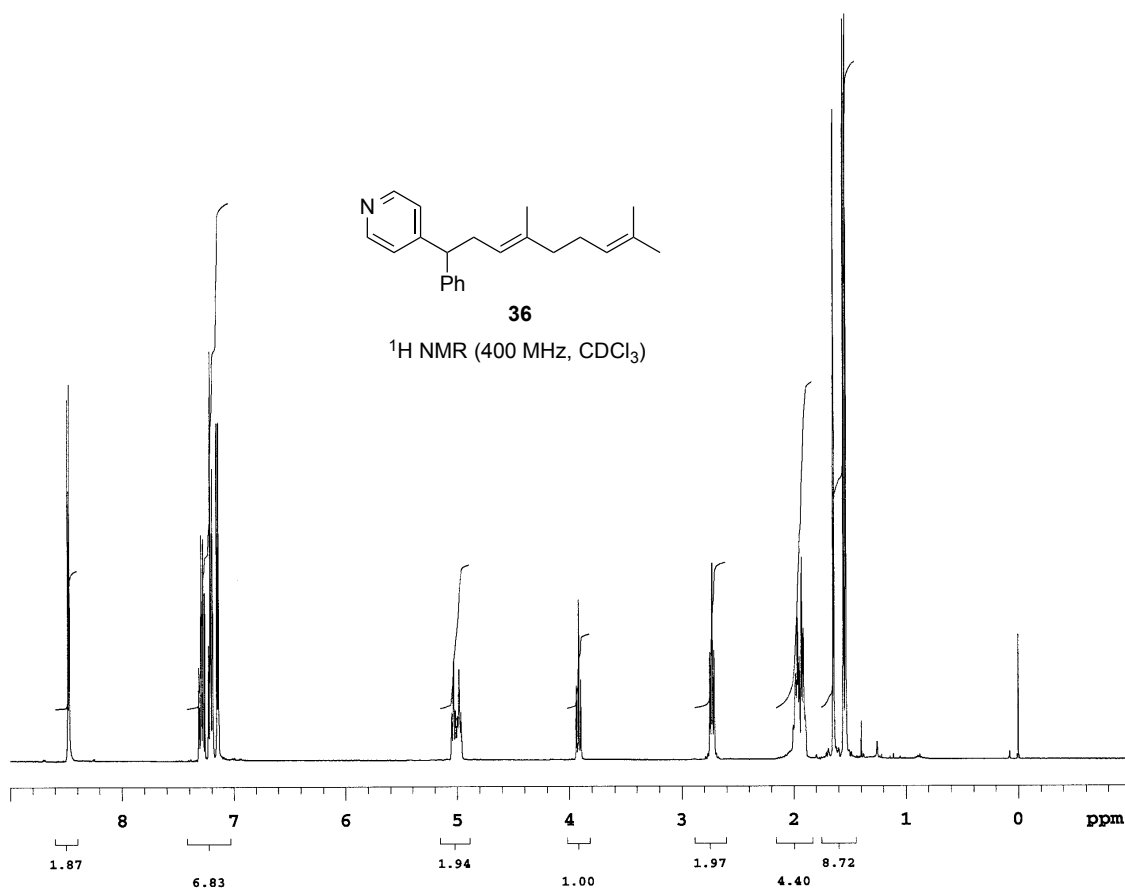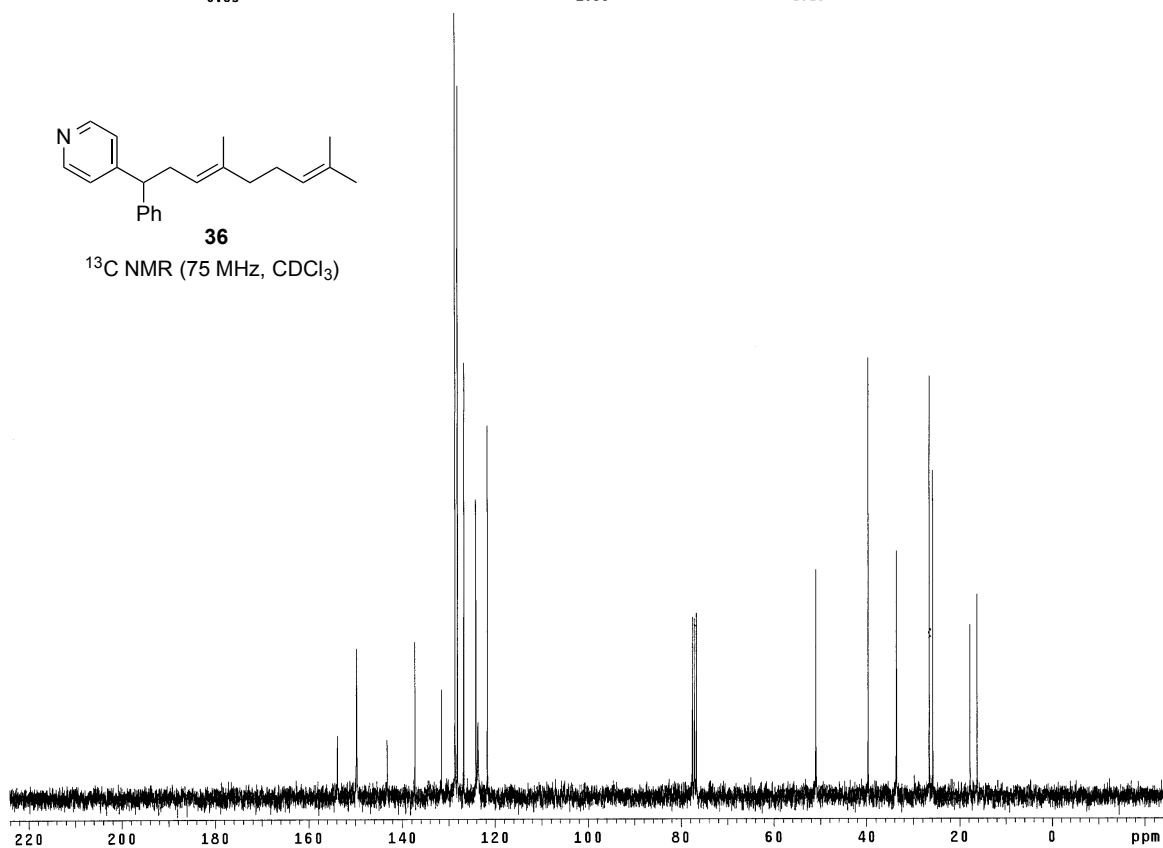

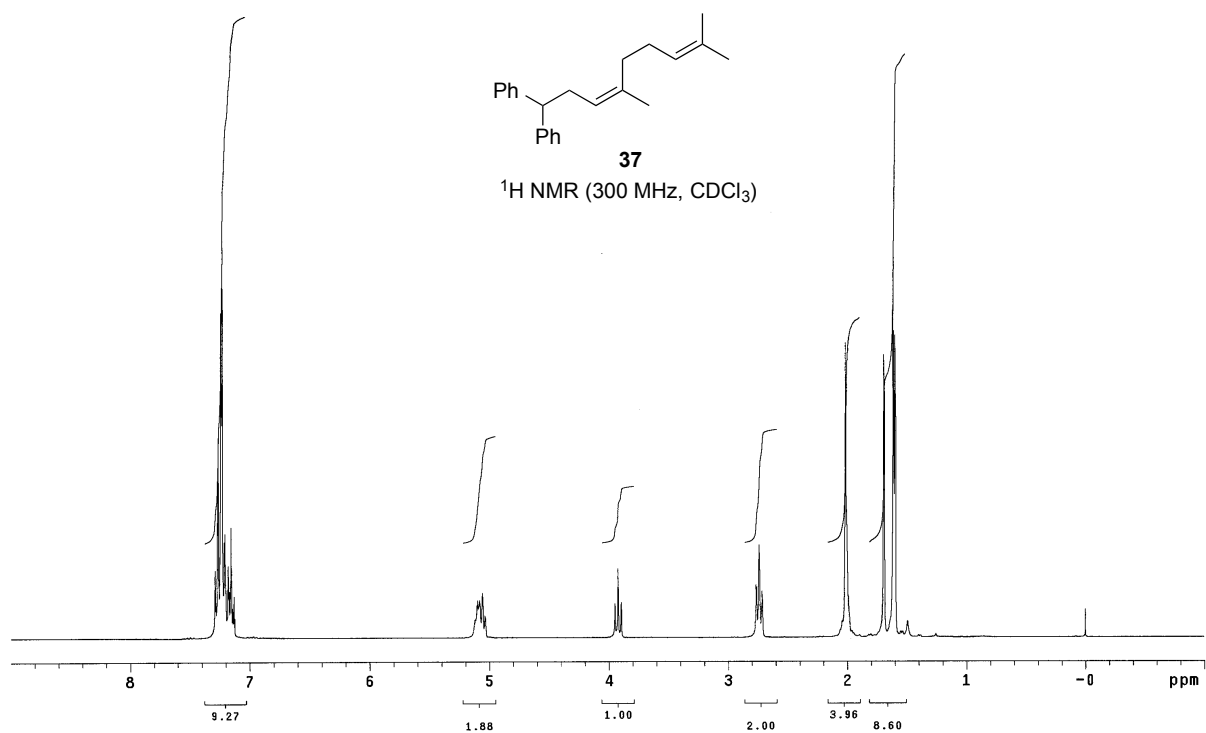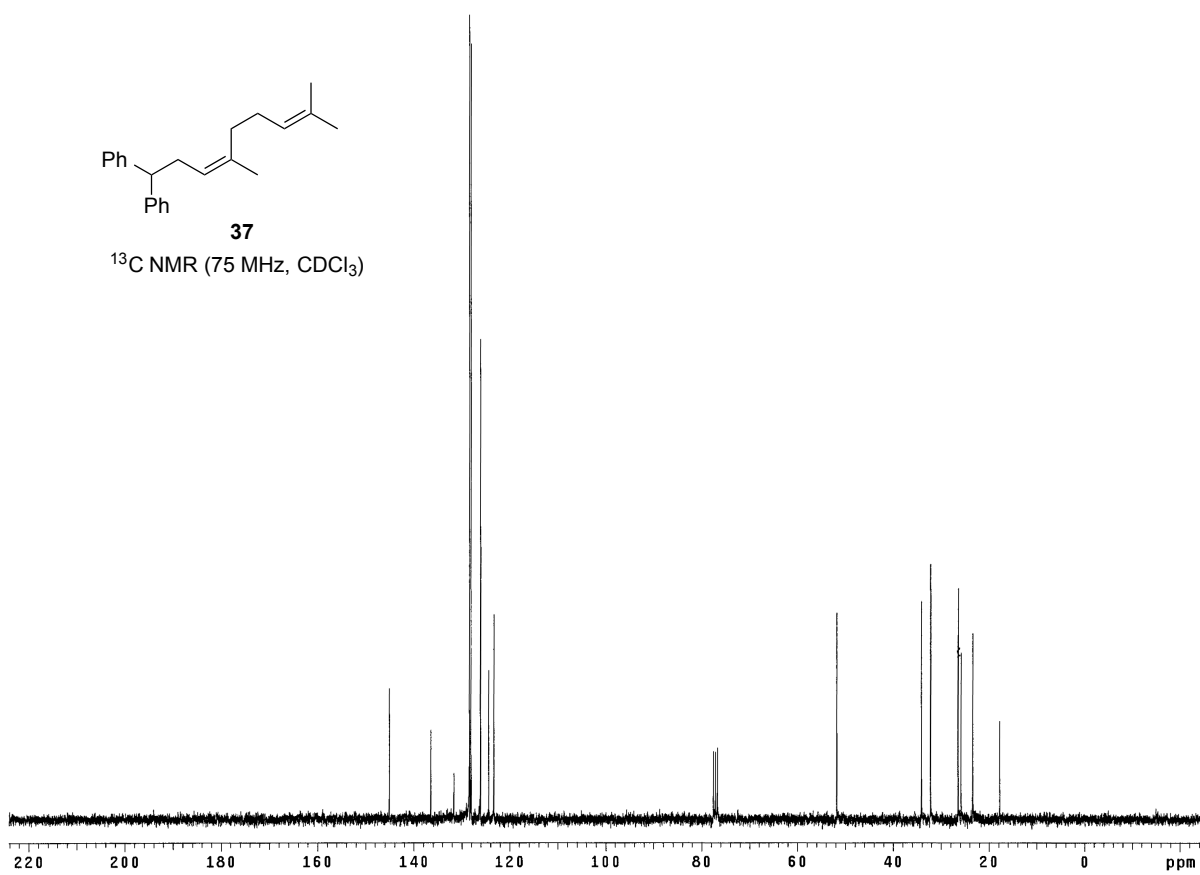

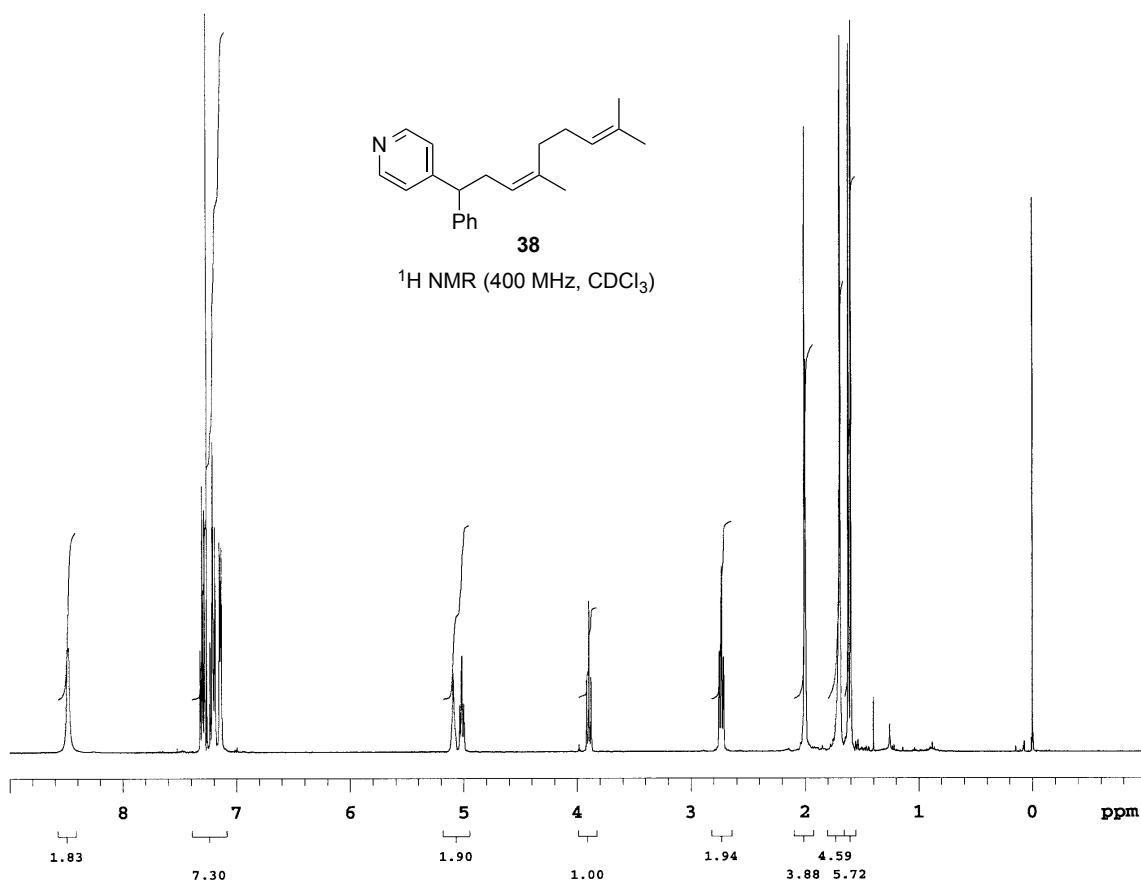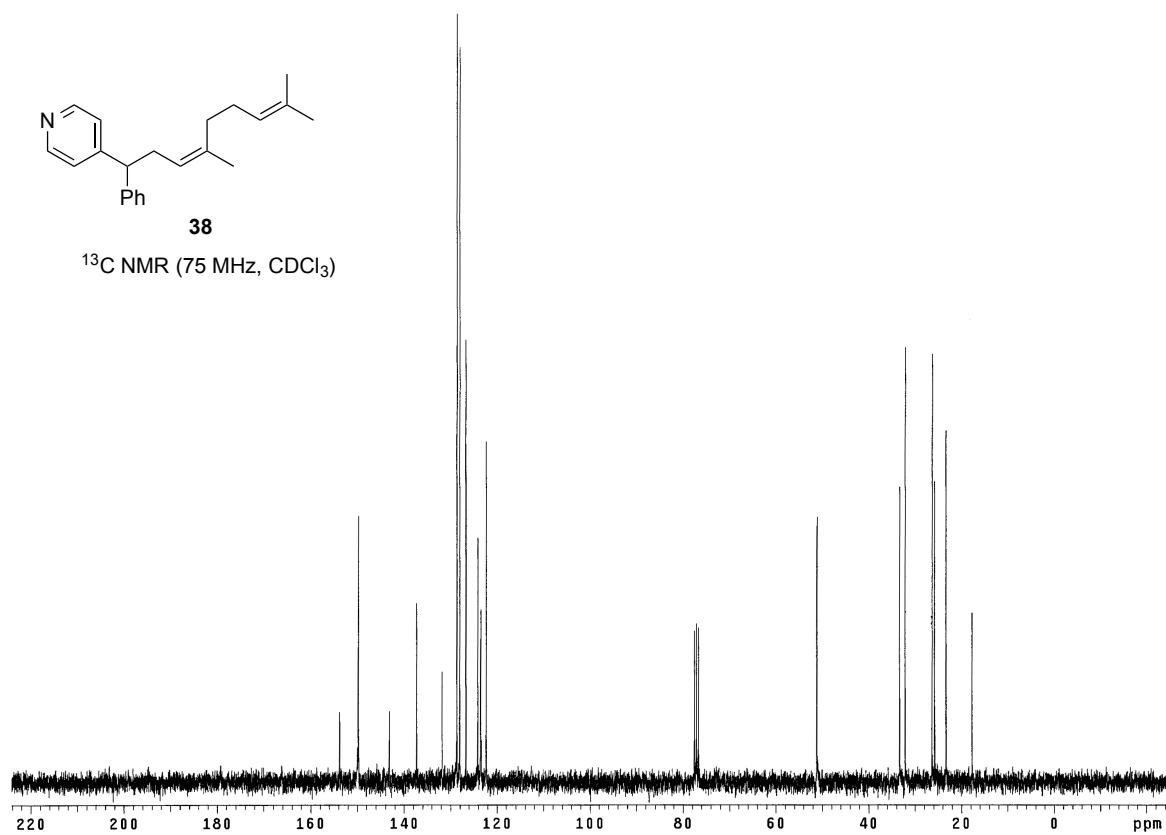

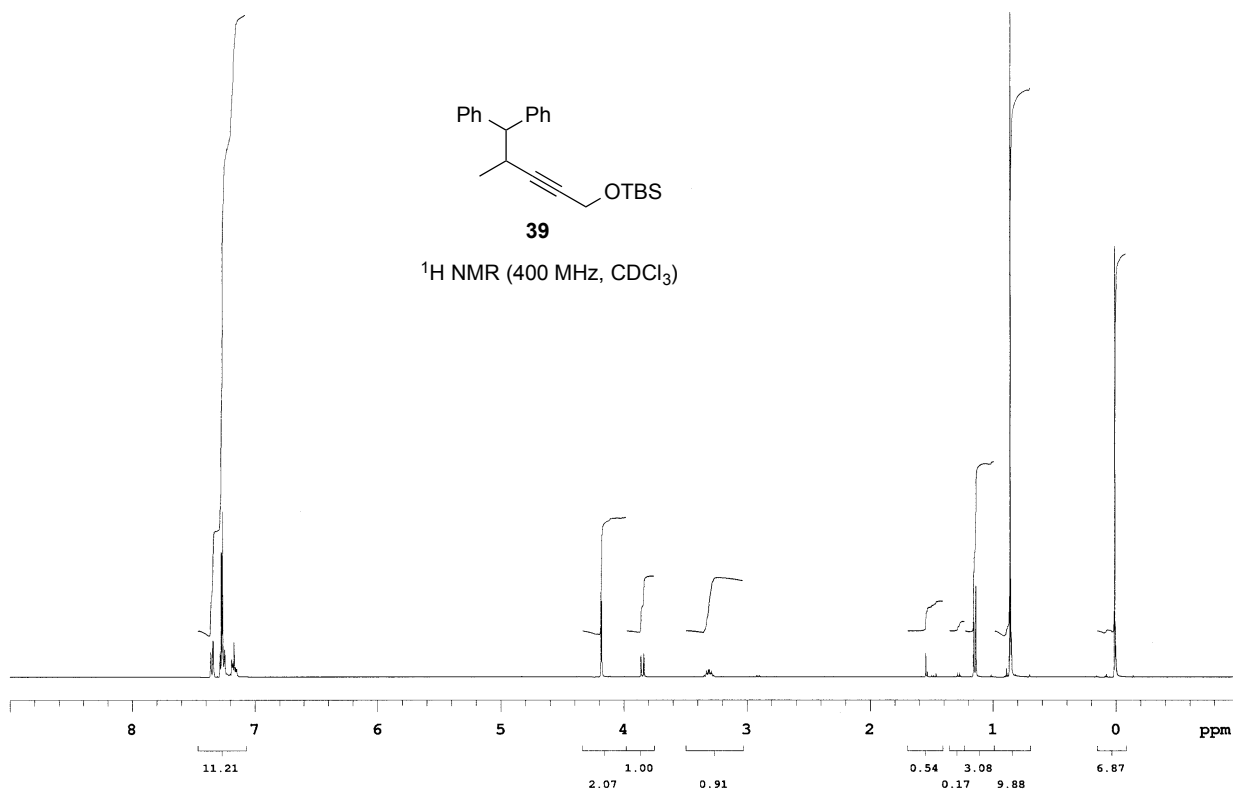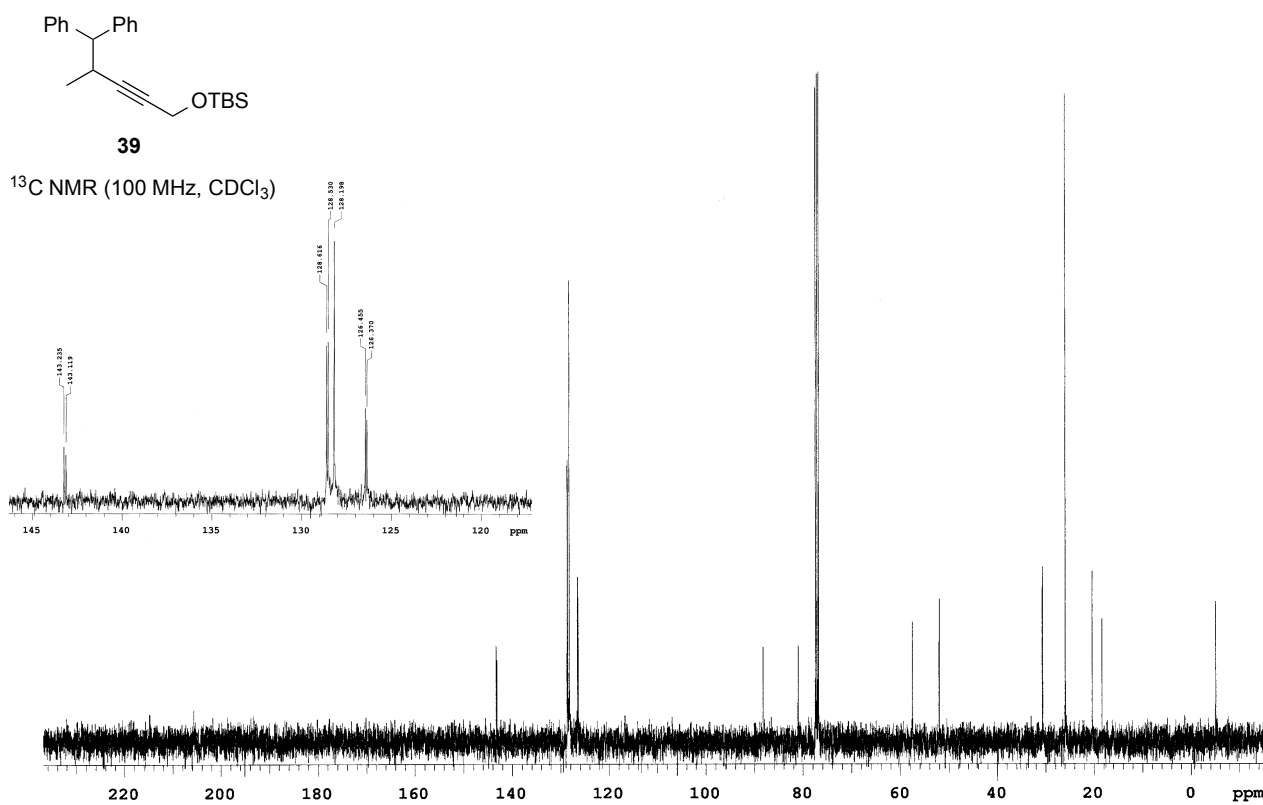

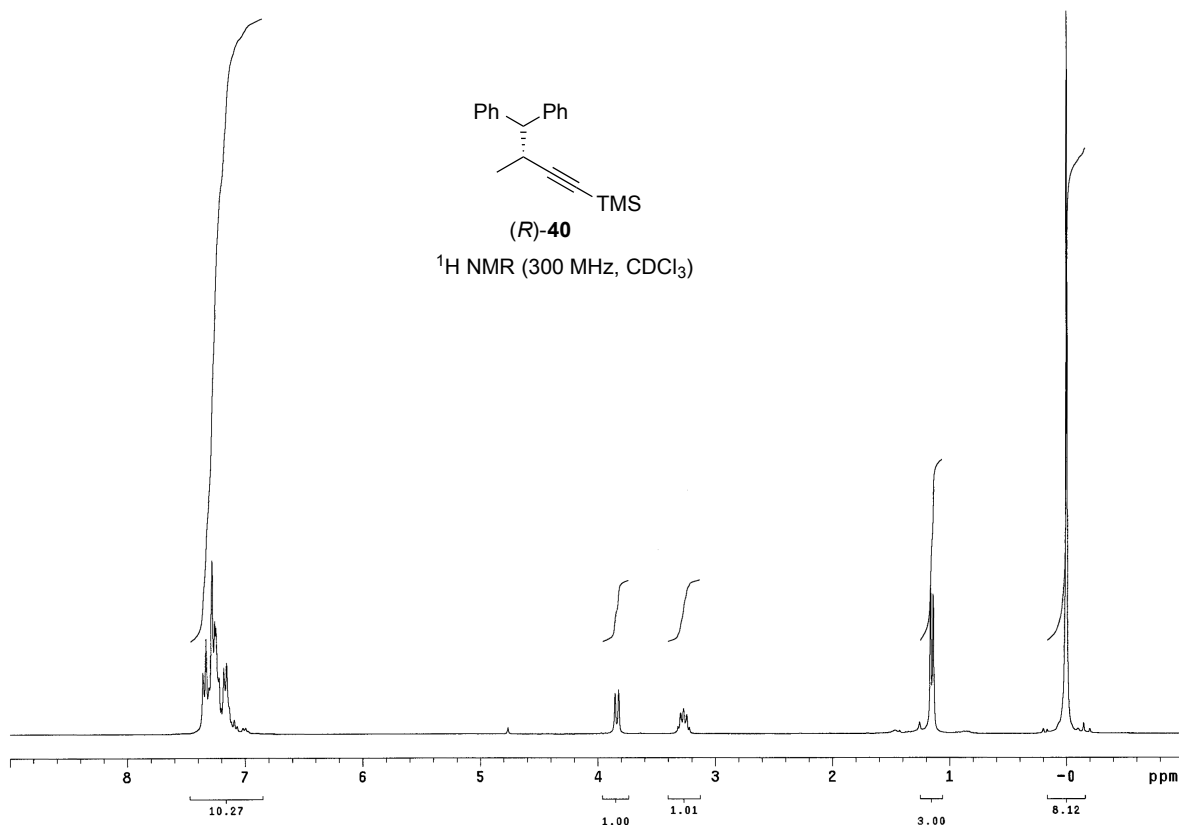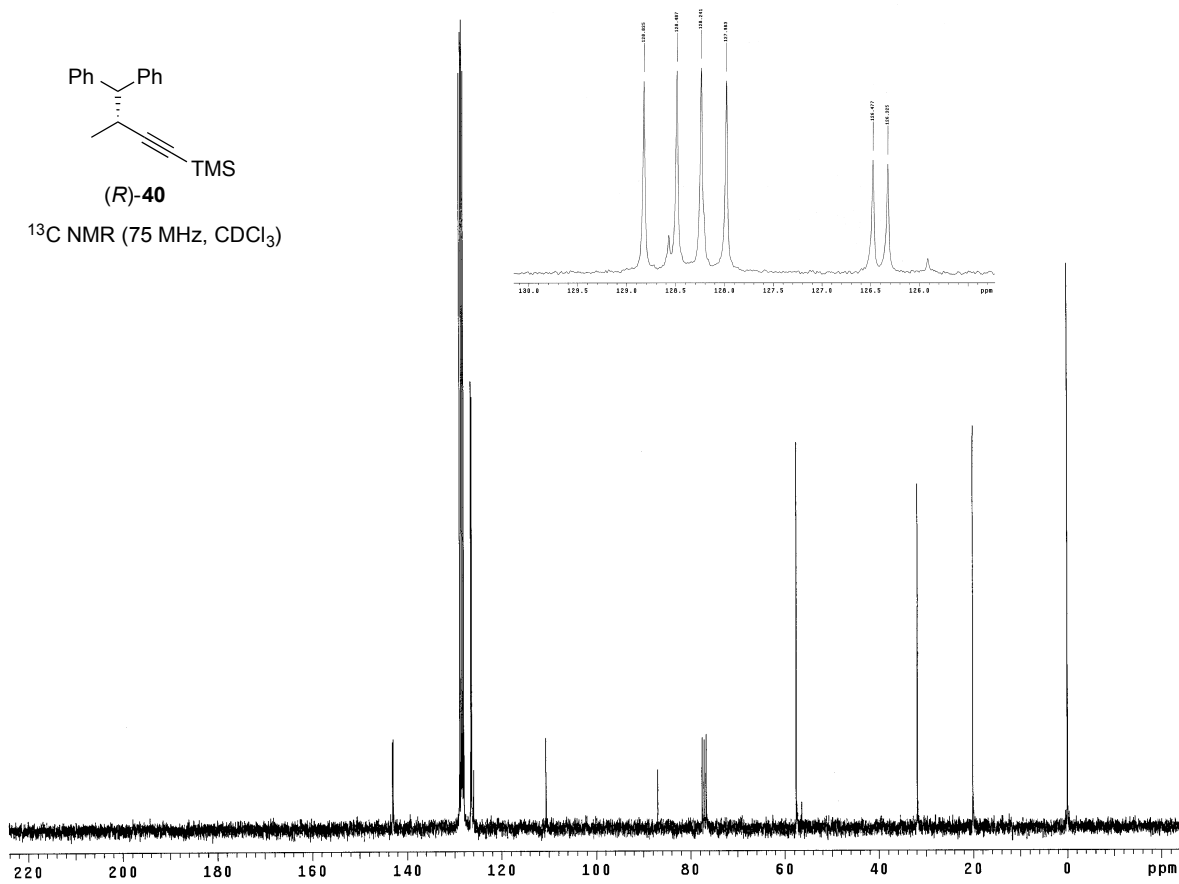

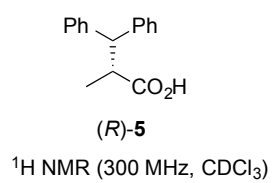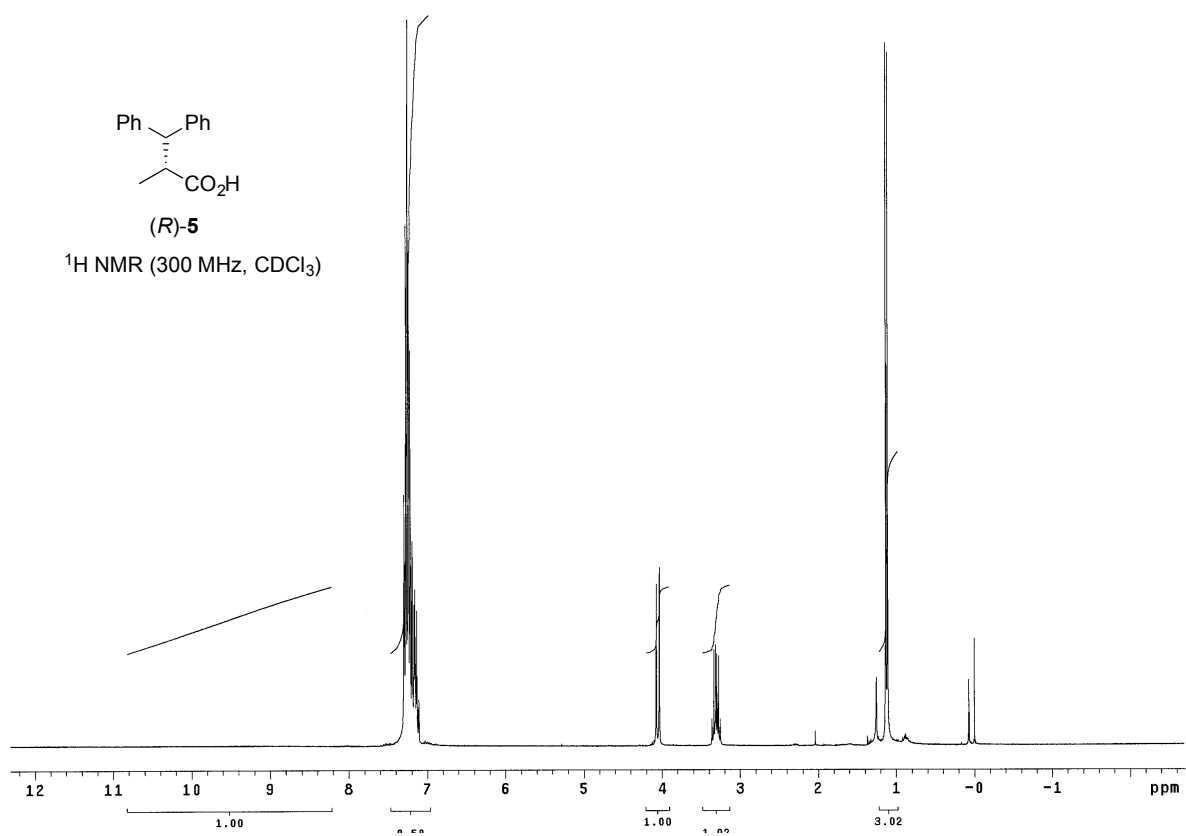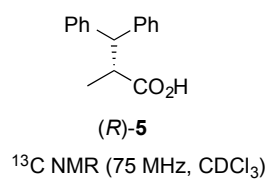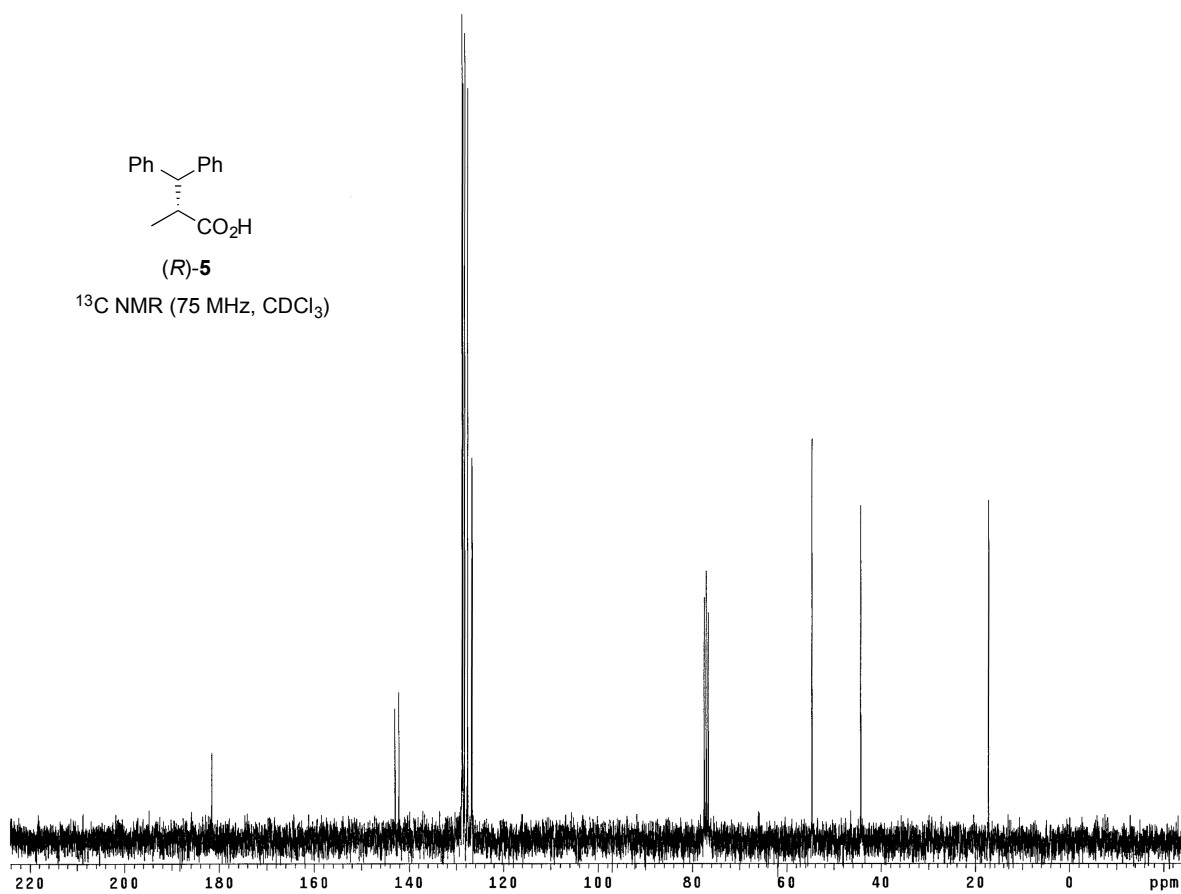



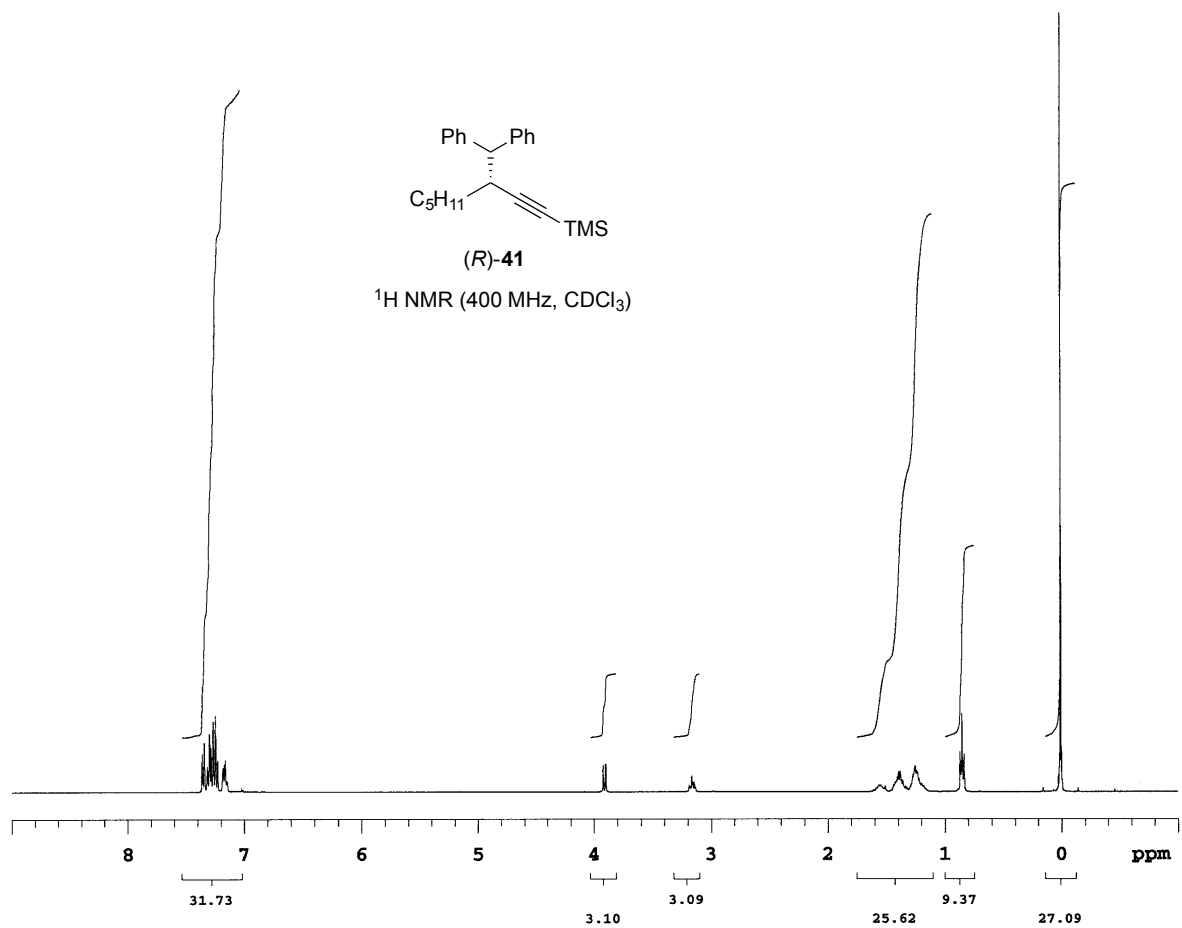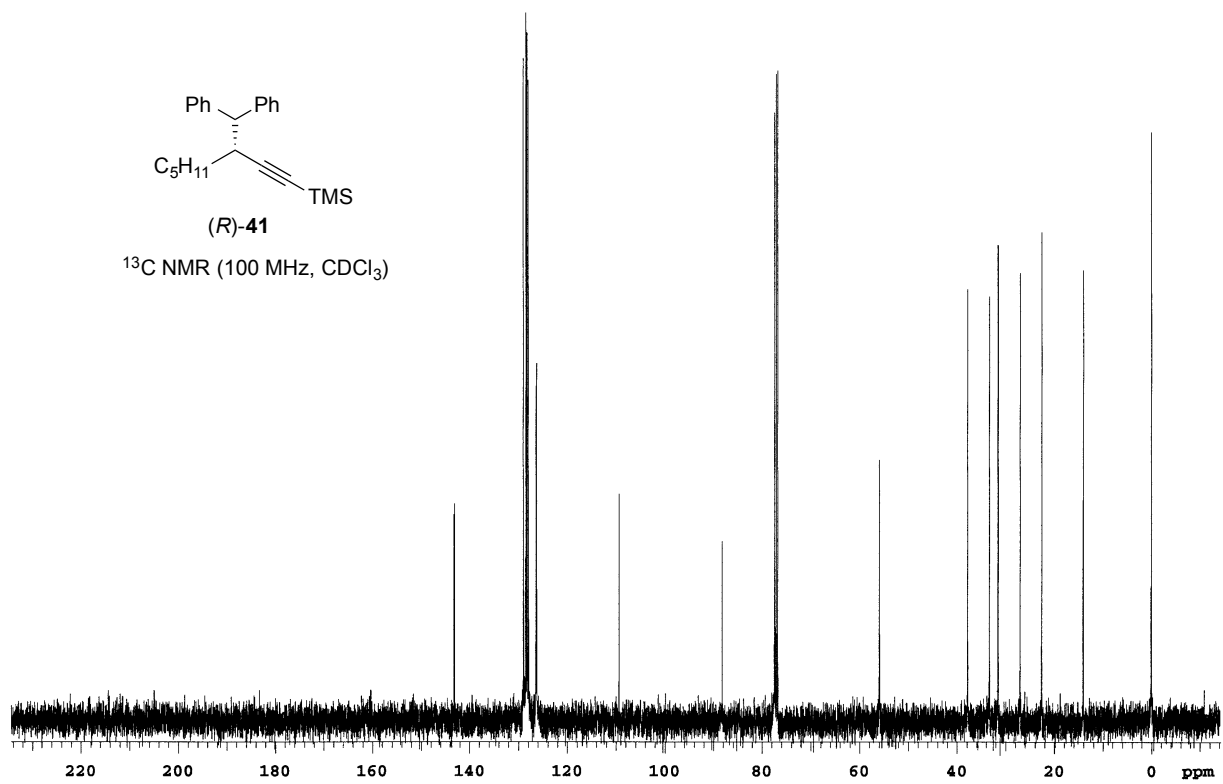

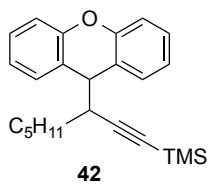

$^1\text{H NMR}$  (400 MHz,  $\text{CDCl}_3$ )

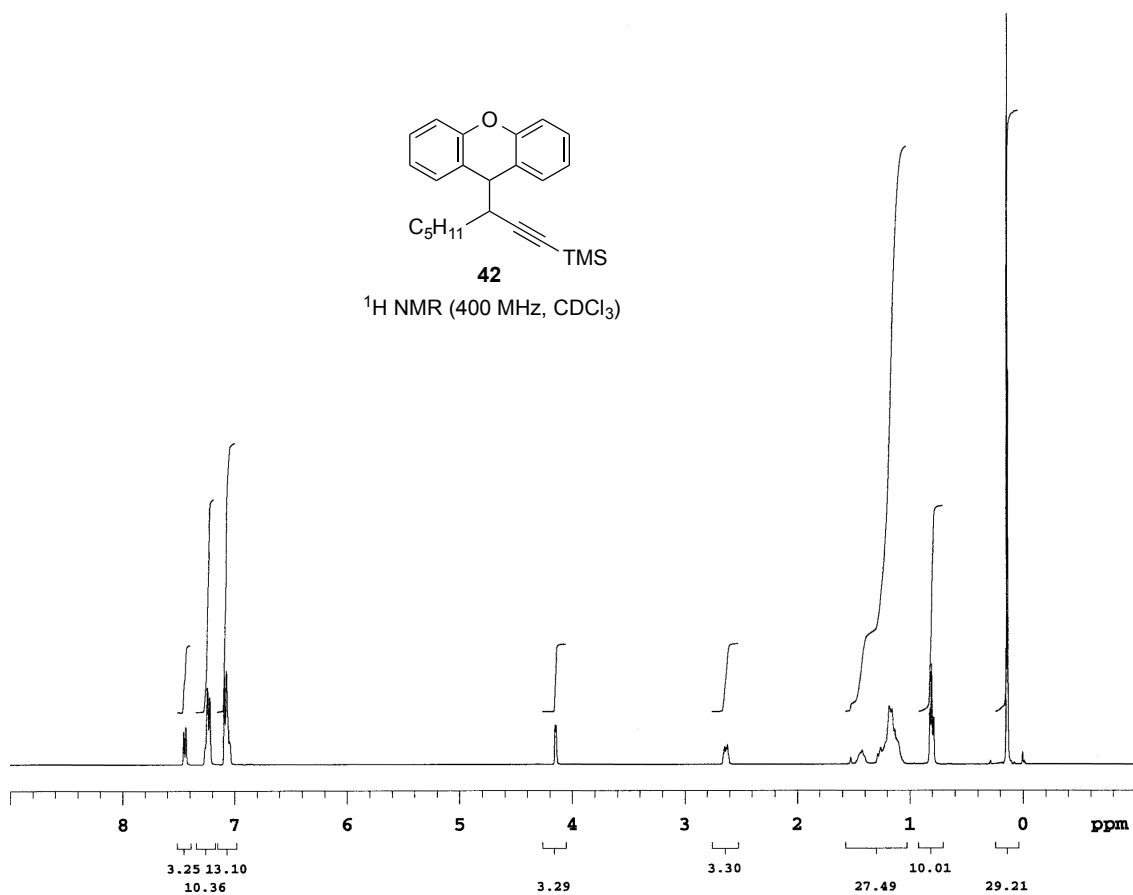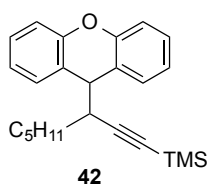

$^{13}\text{C NMR}$  (100 MHz,  $\text{CDCl}_3$ )

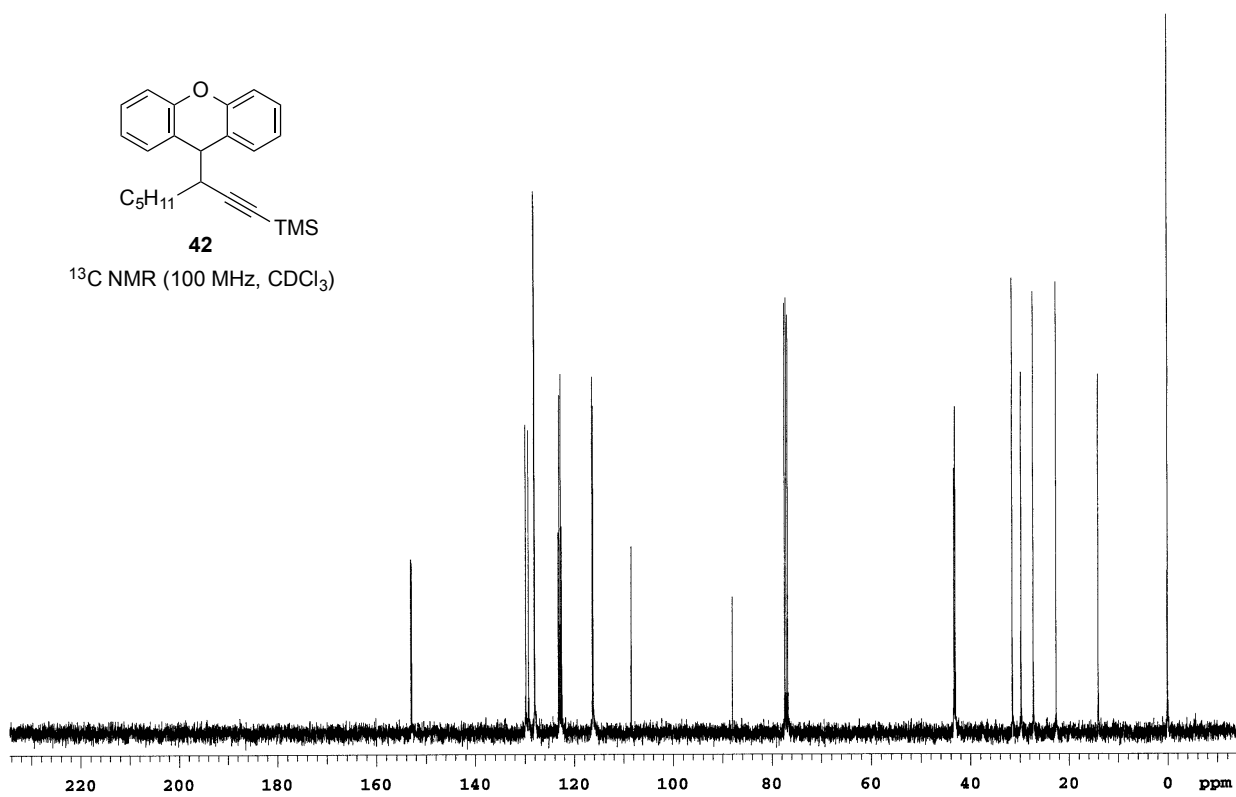

Supplement: c6cc00024j1.pdf [file c6cc00024j1.pdf]
